# Supplementary material for: Global Responses of Resistant and Susceptible Sorghum (Sorghum bicolor) to Sugarcane Aphid (Melanaphis sacchari)
Source: Front Plant Sci. 2019 Feb 22;10:145. doi: 10.3389/fpls.2019.00145 (PMC6396740; doi:10.3389/fpls.2019.00145)
Supplement: Supplementary file 4 [file Table_4.XLSX]

## Sheet: SuppTableControls
Table S4. Basal genotype differences without aphid infestation. Venn Diagram (VD) designation for differentially expressed genes for susceptible (A/BCK60) and resistant (RTx2783) control plants within timepoint.
					Day 5								Day 10								Day 15
					Susceptible (BCK60)				Resistant (RTx2783)				Susceptible (BCK60)				Resistant (RTx2783)				Susceptible (BCK60)				Resistant (RTx2783)
					Control		Infested		Control		Infested		Control		Infested		Control		Infested		Control		Infested		Control		Infested		Gene annotation
Gene	Genotype comparison	Day	Expression	Number of genes in VD	Counts	SE	Counts	SE	Counts	SE	Counts	SE	Counts	SE	Counts	SE	Counts	SE	Counts	SE	Counts	SE	Counts	SE	Counts	SE	Counts	SE	Best hit Arabidopsis gene	Arabidopsis definition	Best hit Oryza sativa	Oryza sativa definition
Sobic.010G084400	Suscepible vs Resistant	10	Higher in Susceptible	115	33	9.84886	152.333	32.6667	50.6667	25.1286	12.3333	1.20185	62	8.0829	100.333	25.7574	20.6667	1.45297	11.3333	2.90593	102.667	16.7066	108.667	41.4782	22.6667	3.84419	19	0.57735	AT1G76680.1	12-oxophytodienoate reductase 1	LOC_Os06g11290.1	12-oxophytodienoate reductase, putative, expressed
Sobic.010G084700	Suscepible vs Resistant	10 15	Higher in Susceptible	200	33.6667	14.4261	130.667	72.5266	165.667	85.1319	15	2.88675	73	7.0946	183.333	44.1752	20.6667	3.1798	15.3333	8.95048	210	17.088	338	176.231	52	7.50555	42	4.93288	AT1G76690.1	12-oxophytodienoate reductase 2	LOC_Os06g11290.1	12-oxophytodienoate reductase, putative, expressed
Sobic.010G084600	Suscepible vs Resistant	5	Lower in Susceptible	131	2	2	40.3333	33.5774	40.6667	28.4976	5.33333	2.90593	2	2	0	0	8	2	5.33333	3.1798	4.33333	2.33333	0	0	21.3333	5.23874	15.3333	1.85592	AT1G76690.1	12-oxophytodienoate reductase 2	LOC_Os06g11290.1	12-oxophytodienoate reductase, putative, expressed
Sobic.006G091800	Suscepible vs Resistant	5 10 15	Lower in Susceptible	289	2	2	6.33333	3.75648	79.6667	5.78312	73	9.45163	0	0	0	0	67.6667	6.17342	56.3333	4.33333	1.66667	1.66667	0	0	36	7.81025	40	2.51661	AT1G76690.1	12-oxophytodienoate reductase 2	LOC_Os02g35310.1	12-oxophytodienoate reductase, putative, expressed
Sobic.003G039400	Suscepible vs Resistant	10 15	Lower in Susceptible	170	11.6667	3.1798	7.66667	0.881917	13.6667	2.4037	6	0	2	2	4.33333	2.18581	23.3333	6.33333	15.6667	4.17665	17.6667	1.85592	7.33333	4.05518	9.66667	2.18581	9.66667	2.18581	AT5G12020.1	17.6 kDa class II heat shock protein	LOC_Os01g08860.1	hsp20/alpha crystallin family protein, putative, expressed
Sobic.002G373300	Suscepible vs Resistant	10	Lower in Susceptible	95	43	5.2915	54	7.50555	91.3333	15.3768	82	1.1547	27	4.04145	36.6667	8.68588	90.3333	4.33333	82.6667	8.66667	48.6667	4.25572	33.6667	2.33333	113.667	10.4775	129	4.58258	AT2G05840.1	20S proteasome subunit PAA2	LOC_Os03g08280.2	peptidase, T1 family, putative, expressed
Sobic.002G213050	Suscepible vs Resistant	5	Lower in Susceptible	131	3	3	2.66667	2.66667	34.6667	29.1681	2	2	4.33333	2.18581	2.33333	2.33333	30.6667	27.7208	1.66667	1.66667	0	0	2.66667	2.66667	2	2	11.6667	8.00694	AT5G53000.1	2A phosphatase associated protein of 46 kD	LOC_Os12g04290.1	PP2A regulatory subunit TAP46, putative, expressed
Sobic.010G059800	Suscepible vs Resistant	10	Higher in Susceptible	115	85.6667	2.96273	98	15.0111	42.3333	5.696	47	3	156.667	46.5988	120.667	19.1514	40	5.56776	44.3333	17.9475	100.333	8.17177	150.333	43.8419	52	3.51188	66	11.2694	AT5G20550.1	2-oxoglutarate (2OG) and Fe(II)-dependent oxygenase superfamily protein	LOC_Os06g08014.1	hydroxylase, putative, expressed
Sobic.002G173700	Suscepible vs Resistant	5 10	Higher in Susceptible	198	1939.33	113.719	2006	252.721	136.333	26.6604	134.667	37.5292	888.667	261.18	1389.67	345.428	70.6667	13.4825	138.667	42.2624	1262	127.017	865.333	68.7055	70	24.5425	77.6667	16.905	AT3G21360.1	2-oxoglutarate (2OG) and Fe(II)-dependent oxygenase superfamily protein	LOC_Os08g29510.1	expressed protein
Sobic.003G143000	Suscepible vs Resistant	5 10	Higher in Susceptible	198	76	1.52753	64	7.2111	3	3	0	0	78.6667	13.6178	37	4.6188	0	0	0	0	46	5.50757	31.3333	8.95048	0	0	0	0	AT1G78550.1	2-oxoglutarate (2OG) and Fe(II)-dependent oxygenase superfamily protein	LOC_Os10g40880.1	flavonol synthase/flavanone 3-hydroxylase, putative, expressed
Sobic.007G070400	Suscepible vs Resistant	5 10 15	Higher in Susceptible	392	340.333	50.4392	519.333	49.3874	65.3333	14.3798	61.3333	7.2188	517.333	100.195	674	79.2549	70.6667	3.1798	59.3333	15.899	162	37.072	524.333	51.8727	32	1.52753	73.3333	13.1318	AT1G06650.2	2-oxoglutarate (2OG) and Fe(II)-dependent oxygenase superfamily protein	LOC_Os03g48430.1	1-aminocyclopropane-1-carboxylate oxidase homolog 4, putative, expressed
Sobic.006G257400	Suscepible vs Resistant	10 15	Lower in Susceptible	170	4	2	5.66667	2.848	20.3333	3.28295	14.3333	4.63081	2.33333	2.33333	8	0.57735	25.6667	6.17342	20.3333	2.4037	10.6667	1.45297	9.66667	1.66667	24.6667	5.696	23.6667	2.90593	AT3G60290.1	2-oxoglutarate (2OG) and Fe(II)-dependent oxygenase superfamily protein	LOC_Os04g57160.2	flavonol synthase/flavanone 3-hydroxylase, putative, expressed
Sobic.009G226100	Suscepible vs Resistant	10 15	Lower in Susceptible	170	26	2.08167	16	1.52753	27.6667	3.28295	24.6667	7.5351	11	6.08276	6.33333	3.1798	35.6667	6.06447	22.3333	3.66667	16	2.08167	7	4.72582	20.3333	2.96273	17.3333	1.66667	AT4G13400.1	2-oxoglutarate (2OG) and Fe(II)-dependent oxygenase superfamily protein	LOC_Os05g48230.1	expressed protein
Sobic.008G002600	Suscepible vs Resistant	5 10 15	Lower in Susceptible	289	2	2	2	2	23.6667	3.38296	42	2.51661	0	0	3.33333	3.33333	42.6667	3.52767	45	6.1101	0	0	0	0	33.6667	2.02759	34	3.51188	AT2G38240.1	2-oxoglutarate (2OG) and Fe(II)-dependent oxygenase superfamily protein	LOC_Os11g25060.1	flavonol synthase/flavanone 3-hydroxylase, putative, expressed
Sobic.010G194100	Suscepible vs Resistant	5 10 15	Lower in Susceptible	289	102	11.7189	138	7.2111	894.333	11.6667	1307.67	64.6692	124	19.6723	192.333	20.5372	783.667	97.0504	1128.33	119.499	107.333	7.31057	197.667	44.6928	518.333	61.6991	699	22.5167	AT5G20400.1	2-oxoglutarate (2OG) and Fe(II)-dependent oxygenase superfamily protein	LOC_Os06g08041.1	iron/ascorbate-dependent oxidoreductase, putative, expressed
Sobic.005G077001	Suscepible vs Resistant	5 10 15	Lower in Susceptible	289	2.66667	2.66667	5.33333	2.66667	114.667	17.5341	119.333	5.20683	0	0	3	3	182.333	20.0028	106.667	18.0954	1.66667	1.66667	0	0	47.6667	8.33333	20.3333	2.96273	AT4G24770.1	31-kDa RNA binding protein	LOC_Os09g39190.2	OsFBO22 - F-box and other domain containing protein, expressed
Sobic.001G343400	Suscepible vs Resistant	5 10 15	Higher in Susceptible	392	69.3333	15.7621	18.3333	4.91031	15.3333	4.66667	11.3333	2.72845	48	2.51661	10.6667	1.45297	8.33333	5.60753	10.6667	3.71184	93.6667	14.8361	4.33333	2.33333	1.66667	1.66667	6.33333	4.09607	AT1G47290.2	3beta-hydroxysteroid-dehydrogenase/decarboxylase isoform 1	LOC_Os03g29170.1	sterol-4-alpha-carboxylate 3-dehydrogenase, decarboxylating, putative, expressed
Sobic.001G343300	Suscepible vs Resistant	5 10	Lower in Susceptible	161	31.3333	6.9602	26	16.5025	191	11.547	102	26.7644	21	14.5029	3.33333	3.33333	166.667	21.0502	136.667	54.5293	132.667	19.0992	2.66667	2.66667	168.667	27.205	134	19.6299	AT1G47290.2	3beta-hydroxysteroid-dehydrogenase/decarboxylase isoform 1	LOC_Os03g29150.1	NAD dependent epimerase/dehydratase family protein, putative, expressed
Sobic.001G343832	Suscepible vs Resistant	5 10 15	Lower in Susceptible	289	2	2	4.66667	4.66667	56	8.0829	92.6667	13.3208	0	0	6.33333	0.333333	59.3333	6.76593	70.3333	6.88799	5.66667	0.666667	1.66667	1.66667	101.333	3.28295	82.6667	19.7005	AT1G47290.1	3beta-hydroxysteroid-dehydrogenase/decarboxylase isoform 1	LOC_Os03g29150.1	NAD dependent epimerase/dehydratase family protein, putative, expressed
Sobic.001G519400	Suscepible vs Resistant	5 10 15	Lower in Susceptible	289	51	20.5508	23.3333	6.43774	774.333	136.15	11023731	11023482	34	4.72582	7.66667	3.84419	409	88.0019	372.333	75.5454	6.66667	1.66667	2	2	127	61.0246	33	10.0167	AT1G47290.2	3beta-hydroxysteroid-dehydrogenase/decarboxylase isoform 1	LOC_Os03g29150.1	NAD dependent epimerase/dehydratase family protein, putative, expressed
Sobic.001G294500	Suscepible vs Resistant	10 15	Lower in Susceptible	170	15	1.1547	8	1.1547	12.3333	3.4801	17.6667	0.666667	2	2	5	2.51661	19.6667	2.90593	16.3333	3.66667	6	3.21455	5.33333	2.90593	10.3333	0.881917	10.3333	2.66667	AT4G33510.1	3-deoxy-d-arabino-heptulosonate 7-phosphate synthase	LOC_Os10g41480.1	phospho-2-dehydro-3-deoxyheptonate aldolase, chloroplast precursor, putative, expressed
Sobic.006G020600	Suscepible vs Resistant	5 10	Lower in Susceptible	161	3	3	2	2	54	16.7033	31.6667	10.1708	5.33333	5.33333	2.33333	2.33333	44	8.0829	29	6.1101	2.33333	2.33333	0	0	58.6667	13.4825	70.6667	6.11919	AT1G68530.1	3-ketoacyl-CoA synthase 6	LOC_Os04g02640.1	3-ketoacyl-CoA synthase 6, putative, expressed
Sobic.006G020500	Suscepible vs Resistant	5 10 15	Lower in Susceptible	289	13	4.50925	12.3333	4.48454	129	46.8615	84.6667	30.1238	18.6667	8.00694	7	3.78594	116.333	33.9231	45.3333	5.84047	45	1.73205	0	0	131	35.949	167	26.6521	AT1G68530.1	3-ketoacyl-CoA synthase 6	LOC_Os04g02640.1	3-ketoacyl-CoA synthase 6, putative, expressed
Sobic.001G102400	Suscepible vs Resistant	10	Lower in Susceptible	95	17.3333	4.25572	24	7.02377	19.6667	0.333333	21	4.6188	5.66667	2.96273	24	4.58258	20.3333	3.71184	18	1.52753	7	3.51188	14.3333	3.4801	20.6667	1.33333	21.6667	4.05518	AT4G34350.1	4-hydroxy-3-methylbut-2-enyl diphosphate reductase	LOC_Os03g52170.1	4-hydroxy-3-methylbut-2-enyl diphosphate reductase, putative, expressed
Sobic.005G043400	Suscepible vs Resistant	5 10 15	Higher in Susceptible	392	238	27.5136	181.667	19.7005	5	5	8.66667	4.91031	156.333	23.5112	89.3333	20.8353	7	1	7.33333	1.85592	252.667	10.8985	150.333	38.0541	0	0	1.66667	1.66667	AT1G75660.1	5\'-3\' exoribonuclease 3	LOC_Os02g28074.1	XRN 5-3 exonuclease N-terminus family protein, expressed
Sobic.010G102900	Suscepible vs Resistant	10	Lower in Susceptible	95	4	2	6	0	12	4.58258	18	2.3094	2.33333	2.33333	3.66667	3.66667	22.3333	0.666667	24.6667	3.4801	6.33333	1.33333	3.33333	3.33333	16.6667	6.06447	17.6667	4.09607	AT3G29575.3	ABI five binding protein 3	LOC_Os03g11550.1	protein of unknown function DUF1675 domain containing protein, expressed
Sobic.001G348100	Suscepible vs Resistant	5 10	Lower in Susceptible	161	66.3333	3.4801	77	6.08276	488	38.1969	417.333	20.0776	36.6667	5.23874	54	12.5831	500.667	60.4906	472	4.6188	61	7.81025	71.3333	17.4865	589	49.339	565.667	29.0077	AT5G48230.2	acetoacetyl-CoA thiolase 2	LOC_Os09g07830.1	acetyl-CoA acetyltransferase, cytosolic, putative, expressed
Sobic.001G262400	Suscepible vs Resistant	5 10 15	Lower in Susceptible	289	13.3333	0.881917	20.6667	7.05534	52.3333	6.17342	37	6.35085	14.3333	1.45297	18.3333	4.91031	42	2.3094	37.6667	3.38296	12.6667	0.333333	53	39.0171	43.3333	7.51295	29	0.57735	AT1G36160.1	acetyl-CoA carboxylase 1	LOC_Os10g21910.1	acetyl-CoA carboxylase, putative, expressed
Sobic.002G316900	Suscepible vs Resistant	10 15	Higher in Susceptible	200	63.3333	9.59745	55.3333	5.33333	25	1.52753	26.3333	4.33333	58.6667	9.9387	66.6667	8.29324	19.6667	4.66667	30.3333	1.76383	80.6667	2.96273	83	14.5717	29.3333	2.02759	24.3333	0.881917	AT2G05710.1	aconitase 3	LOC_Os08g09200.1	aconitate hydratase protein, putative, expressed
Sobic.007G102000	Suscepible vs Resistant	10 15	Lower in Susceptible	170	142.667	15.3768	95	21.2211	234.333	15.1033	256	8.88819	54.6667	23.7791	50	10.9697	241	36.4737	275.333	9.27961	120.667	17.3718	54.3333	12.7715	255.667	14.5182	223	30.3699	AT2G25050.1	Actin-binding FH2 (Formin Homology) protein	LOC_Os04g17130.1	retrotransposon protein, putative, unclassified, expressed
Sobic.007G102300	Suscepible vs Resistant	10 15	Lower in Susceptible	170	48.3333	3.71184	23	2.51661	63	0	60.6667	4.09607	17.6667	3.66667	17.6667	1.45297	56.3333	9.76957	63.3333	8.19214	36	3.21455	18	4.58258	65.3333	1.76383	62.6667	10.2686	AT3G32400.1	Actin-binding FH2/DRF autoregulatory protein	LOC_Os02g55150.2	formin, putative, expressed
Sobic.010G130800	Suscepible vs Resistant	5 10 15	Higher in Susceptible	392	132	22.6053	138.667	16.3435	26	12.5033	25.6667	6.69162	109.333	29.8459	127.667	19.342	19	3	19	3.51188	194.667	28.0614	207.333	55.6247	29.3333	2.72845	39.6667	12.7323	AT1G20560.1	acyl activating enzyme 1	LOC_Os01g24030.1	AMP-binding enzyme, putative, expressed
Sobic.001G515300	Suscepible vs Resistant	5 10 15	Lower in Susceptible	289	17.3333	6.11919	13	2.3094	192.667	51.9882	308.667	35.0254	4.66667	2.33333	7.33333	1.33333	328.667	87.9192	208.667	45.6119	6.66667	0.881917	4	4	148	27.7369	108.667	19.3678	AT1G20560.1	acyl activating enzyme 1	LOC_Os03g04130.1	AMP-binding domain containing protein, expressed
Sobic.010G110700	Suscepible vs Resistant	5 10 15	Higher in Susceptible	392	787	247.186	3152	497.727	112	16.6233	382.667	156.013	509.333	88.6685	3573.67	1050.07	118	29.6142	198	63.5715	1888.67	694.957	6575.67	985.249	435.667	151.941	563.333	64.6899	AT5G16370.1	acyl activating enzyme 5	LOC_Os04g57850.1	AMP-binding enzyme, putative, expressed
Sobic.005G055150	Suscepible vs Resistant	5 10 15	Higher in Susceptible	392	1964.67	159.115	2302.33	297.347	39.3333	18.8355	44.6667	20.6908	1197	450.108	1860	454.72	22.3333	4.40959	37.6667	11.1405	1514.33	95.9311	1205.33	82.7956	9.66667	0.881917	11.6667	4.05518	AT1G03650.1	Acyl-CoA N-acyltransferases (NAT) superfamily protein	LOC_Os10g35680.1	acetyltransferase, GNAT family, putative, expressed
Sobic.001G397200	Suscepible vs Resistant	10	Higher in Susceptible	115	20.6667	1.66667	15.6667	1.45297	14	4.50925	11	1.73205	32	4.04145	19.6667	1.76383	10.3333	2.33333	9.66667	0.333333	31.3333	3.28295	22	3.51188	18.6667	0.881917	13.6667	0.881917	AT3G62550.1	Adenine nucleotide alpha hydrolases-like superfamily protein	LOC_Os03g19270.3	universal stress protein domain containing protein, putative, expressed
Sobic.001G363100	Suscepible vs Resistant	5 10	Higher in Susceptible	198	826.667	313.542	1829.67	701.26	172	63.9557	664.667	196.795	410	61.1583	1340.33	316.999	112.333	19.342	468	49.1155	896.667	239.512	1818.33	277.557	449.333	106.603	521.667	98.4553	AT3G62550.1	Adenine nucleotide alpha hydrolases-like superfamily protein	LOC_Os05g28740.1	universal stress protein domain containing protein, putative, expressed
Sobic.003G067800	Suscepible vs Resistant	5 10 15	Lower in Susceptible	289	11	4.04145	9.66667	0.881917	86.6667	24.0301	248.333	76.7014	4.66667	4.66667	18.3333	14.5182	70	28.5365	126	7.23418	8.66667	1.20185	6.33333	4.09607	55.3333	2.90593	88.6667	4.8074	AT2G47710.1	Adenine nucleotide alpha hydrolases-like superfamily protein	LOC_Os07g47620.1	universal stress protein domain containing protein, putative, expressed
Sobic.006G107700	Suscepible vs Resistant	5 10 15	Higher in Susceptible	392	161.667	5.36449	174.333	7.79601	28	3.60555	36	5.85947	123.333	11.7237	182.667	15.7621	27.3333	3.71184	27	6.65833	138.667	3.75648	109.333	5.48736	64.6667	1.45297	65.3333	7.5351	AT3G57230.1	AGAMOUS-like 16	LOC_Os02g36924.1	OsMADS27 - MADS-box family gene with MIKCc type-box, expressed
Sobic.001G471100	Suscepible vs Resistant	10 15	Higher in Susceptible	200	25.6667	7.83865	61.6667	22.1911	24.6667	10.0885	14	6.1101	40.3333	6.35959	64.6667	10.5251	16.3333	0.333333	13.3333	5.4569	43	19.218	65.6667	23.1325	8.33333	2.02759	27	8.18535	AT2G13810.1	AGD2-like defense response protein 1	LOC_Os03g09910.1	aminotransferase, classes I and II, domain containing protein, expressed
Sobic.001G004600	Suscepible vs Resistant	5	Lower in Susceptible	131	23.6667	4.91031	21	1.52753	71.3333	6.00925	66	9.71253	27	1.1547	15.6667	2.4037	68.3333	16.4553	101.333	10.2686	34.3333	2.96273	23.6667	7.68838	124	7	93	8.02081	AT1G26540.1	Agenet domain-containing protein	LOC_Os11g19730.1	expressed protein
Sobic.010G251900	Suscepible vs Resistant	10 15	Lower in Susceptible	170	8.33333	4.17665	4	2	27	1.52753	43	5.50757	4	4	3	3	27.6667	1.33333	42.3333	3.33333	12	2	11.3333	6.35959	27.3333	3.84419	27	4.3589	AT1G26540.1	Agenet domain-containing protein	LOC_Os11g35060.1	agenet domain containing protein, expressed
Sobic.001G007700	Suscepible vs Resistant	10 15	Higher in Susceptible	200	109.333	4.09607	155	21.5019	55.3333	4.37163	65.6667	5.33333	121.333	33.2081	159.333	32.59	38.6667	8.83805	49.6667	7.17248	102	6.65833	165.667	0.881917	42.6667	3.92994	52.3333	2.60342	AT3G02910.1	AIG2-like (avirulence induced gene) family protein	LOC_Os03g63700.1	AIG2-like family domain containing protein, expressed
Sobic.005G103300	Suscepible vs Resistant	5 10 15	Lower in Susceptible	289	148.667	22.2436	231	31.5647	1317.67	147.856	1510.33	47.6457	262.667	10.4137	354	31.39	1689	442.539	1722.67	183.452	200.667	17.0717	331	20.9841	1289.67	25.4384	1736	115.11	AT1G77120.1	alcohol dehydrogenase 1	LOC_Os11g10510.1	dehydrogenase, putative, expressed
Sobic.006G163300	Suscepible vs Resistant	10 15	Lower in Susceptible	170	139.667	48.7727	75.6667	11.6952	257.333	47.8934	209.333	62.9135	81.3333	11.0504	34.6667	8.41295	324.333	99.1402	331.667	58.7235	172	13.3167	81	43.8634	300.333	52.1227	313	42.9302	AT4G36250.1	aldehyde dehydrogenase 3F1	LOC_Os04g45720.1	aldehyde dehydrogenase, putative, expressed
Sobic.001G056500	Suscepible vs Resistant	5	Lower in Susceptible	131	10.6667	3.28295	79.3333	57.4582	61	22.0076	26.3333	9.38675	15	10.4083	186.333	162.416	26.6667	8.08977	14.6667	5.696	25.3333	11.4649	53.3333	6.76593	95.3333	29.8682	23.3333	6.56591	AT4G02610.1	Aldolase-type TIM barrel family protein	LOC_Os03g58300.1	indole-3-glycerol phosphate lyase, chloroplast precursor, putative, expressed
Sobic.002G066901	Suscepible vs Resistant	5 10 15	Higher in Susceptible	392	106.333	9.02466	112	17.1561	7.66667	4.97773	6	3.4641	66.3333	24.504	114	26.0576	5	2.64575	6	3.4641	105.667	3.52767	160.667	38.9544	0	0	3.33333	1.66667	AT3G11200.1	alfin-like 2	LOC_Os05g07040.1	PHD finger protein, putative, expressed
Sobic.001G063000	Suscepible vs Resistant	10	Higher in Susceptible	115	12.6667	3.1798	33	5.1316	18	2.51661	23	2.88675	22.3333	4.09607	34	1.52753	9	3	20.3333	2.33333	19	5.2915	61.3333	20.8833	16.6667	1.33333	27.3333	5.23874	AT5G06570.2	alpha/beta-Hydrolases superfamily protein	LOC_Os03g57640.1	gibberellin receptor GID1L2, putative, expressed
Sobic.001G103800	Suscepible vs Resistant	10 15	Higher in Susceptible	200	89.3333	16.0139	63.6667	7.5351	35	5.1316	35.3333	6.11919	168.333	61.6559	102.333	23.6807	39	8.3865	39	5.68624	114.333	13.2832	67.6667	15.0591	36	5.1316	81	3.78594	AT1G27480.1	alpha/beta-Hydrolases superfamily protein	LOC_Os03g52010.1	lecithin cholesterol acyltransferase, putative, expressed
Sobic.003G249200	Suscepible vs Resistant	10 15	Higher in Susceptible	200	57	4.16333	48.3333	6.69162	22	2.64575	29	3.60555	69	23.5443	47	9.07377	23.3333	5.17472	25.6667	4.66667	38.6667	5.23874	32	8.3865	18	2	24.3333	5.696	AT5G50890.1	alpha/beta-Hydrolases superfamily protein	LOC_Os01g47610.1	lipase class 3 family protein, putative, expressed
Sobic.008G189200	Suscepible vs Resistant	10 15	Higher in Susceptible	200	196	16.2583	396	51.0131	112	15.695	108.667	15.3768	414.333	29.8068	692.333	57.4582	104	20.5264	136.667	27.8827	355.333	76.3879	1092	347.852	123.667	10.5883	281	46.6083	AT3G51000.1	alpha/beta-Hydrolases superfamily protein	LOC_Os12g43970.1	hydrolase, alpha/beta fold family domain containing protein, expressed
Sobic.001G288200	Suscepible vs Resistant	5 10 15	Higher in Susceptible	392	40	3.05505	48	9.81495	6.33333	3.1798	5.66667	5.66667	36	3.60555	59.6667	5.66667	3.66667	3.66667	8	1.73205	54.3333	2.90593	103.667	15.6241	3.33333	3.33333	5.33333	3.1798	AT1G27480.1	alpha/beta-Hydrolases superfamily protein	LOC_Os01g71800.1	lecithin cholesterol acyltransferase, putative, expressed
Sobic.003G197000	Suscepible vs Resistant	5 10 15	Higher in Susceptible	392	550	39	591	54.8574	15	7.2111	14.6667	8.37324	625.667	72.795	548.333	57.6696	3	3	11	5.56776	314	11.5902	243.667	22.1535	0	0	2.66667	2.66667	AT3G47590.1	alpha/beta-Hydrolases superfamily protein	LOC_Os01g39800.1	esterase, putative, expressed
Sobic.005G213700	Suscepible vs Resistant	5 10 15	Higher in Susceptible	392	24.6667	7.31057	17.3333	3.1798	0	0	2.66667	2.66667	25	6.55744	19	4.72582	4	4	0	0	15	4.04145	15.3333	7.68838	1.66667	1.66667	2.66667	2.66667	AT4G02340.1	alpha/beta-Hydrolases superfamily protein	LOC_Os03g61340.1	hydrolase, alpha/beta fold family domain containing protein, expressed
Sobic.003G038000	Suscepible vs Resistant	5	Lower in Susceptible	131	28.6667	1.20185	39.3333	8.29324	141.333	18.8001	111	41.9325	42	3.51188	32.6667	10.105	103.667	28.2921	95	15.1327	19	1.73205	65.6667	33.2683	62.6667	9.90511	92.3333	11.2002	AT1G06800.1	alpha/beta-Hydrolases superfamily protein	LOC_Os05g32380.1	phospholipase, putative, expressed
Sobic.003G065600	Suscepible vs Resistant	5	Lower in Susceptible	131	109	23.5867	129.667	12.5477	395	46.0905	651.333	42.1004	87.3333	1.66667	160.333	42.5258	282.333	102.03	553.667	28.002	124.667	9.13479	237.333	17.817	889	75.3945	856.667	44.5359	AT5G06570.2	alpha/beta-Hydrolases superfamily protein	LOC_Os01g06060.1	gibberellin receptor GID1L2, putative, expressed
Sobic.010G083300	Suscepible vs Resistant	5	Lower in Susceptible	131	6	0	7.66667	1.66667	28.6667	4.70225	22.6667	4.33333	15.3333	6.00925	4	2	24.3333	3.75648	15.3333	1.66667	9.33333	2.33333	2.66667	2.66667	23.3333	3.28295	22.3333	1.76383	AT1G47480.1	alpha/beta-Hydrolases superfamily protein	LOC_Os06g11130.1	gibberellin receptor GID1L2, putative, expressed
Sobic.003G074600	Suscepible vs Resistant	5 10	Lower in Susceptible	161	40.6667	5.36449	42.3333	6.06447	365	24.8462	134.667	37.9532	58	11.7898	33.3333	8.41295	249	48.0139	102	3.51188	25.3333	5.23874	34.3333	7.88106	98.6667	10.8064	65	1.73205	AT1G27480.1	alpha/beta-Hydrolases superfamily protein	LOC_Os02g37654.1	lecithin:cholesterol acyltransferase, putative, expressed
Sobic.009G048100	Suscepible vs Resistant	5 10	Lower in Susceptible	161	107.333	31.2908	124	73.0205	746	109.318	484	150.639	55.3333	6.66667	68	9.53939	256	60.0528	240.333	32.4465	46	9.29157	103	10.6927	264.333	9.9387	323	37.421	AT5G67050.1	alpha/beta-Hydrolases superfamily protein	LOC_Os05g06140.1	lipase, putative, expressed
Sobic.010G102700	Suscepible vs Resistant	5 10	Lower in Susceptible	161	0	0	4	2	41	11.1355	39.3333	4.33333	0	0	2.66667	2.66667	41.3333	6.56591	40	10.6927	0	0	0	0	23.6667	2.96273	36.3333	6.74125	AT1G47480.1	alpha/beta-Hydrolases superfamily protein	LOC_Os09g28720.1	alpha/beta hydrolase fold, putative, expressed
Sobic.003G065400	Suscepible vs Resistant	5 10 15	Lower in Susceptible	289	38	1	41	6.65833	373	60.2246	290.333	31.0716	48	8.5049	26.3333	2.18581	236.667	12.3873	244	21.9317	24.6667	1.85592	27.6667	4.91031	364.667	27.8109	423	18.037	AT5G06570.1	alpha/beta-Hydrolases superfamily protein	LOC_Os01g06060.1	gibberellin receptor GID1L2, putative, expressed
Sobic.002G190500	Suscepible vs Resistant	5 10 15	Lower in Susceptible	289	21	4.16333	45	7.02377	110	16.8028	166.667	45.2929	28	1.52753	101.333	24.8886	110.667	14.8474	126.333	37.3333	61.6667	15.7092	406.333	257.129	236	45.0814	408.333	55.7564	AT4G25000.1	alpha-amylase-like	LOC_Os06g49970.2	alpha-amylase precursor, putative, expressed
Sobic.008G017300	Suscepible vs Resistant	5 10 15	Lower in Susceptible	289	15.3333	1.85592	11.6667	2.96273	91.6667	10.8372	80.6667	5.78312	2	2	4.66667	2.4037	83	21.2838	79	7.93725	6	1	3.66667	3.66667	44	1	45.3333	4.91031	AT3G10740.1	alpha-L-arabinofuranosidase 1	LOC_Os11g03780.2	alpha-N-arabinofuranosidase, putative, expressed
Sobic.009G023700	Suscepible vs Resistant	5 10 15	Lower in Susceptible	289	85.6667	4.66667	94.6667	2.66667	721.667	400.202	497.667	136.237	253.333	95.6754	87	26.5141	1310.67	417.878	517.667	213.214	50.3333	12.0046	30	4.72582	148.333	67.494	104.667	52.8215	AT2G37330.1	aluminum sensitive 3	LOC_Os05g02750.1	ABC transporter, membrane-spanning/permease subunit, putative, expressed
Sobic.002G301600	Suscepible vs Resistant	5 10	Lower in Susceptible	161	97	7.50555	114.667	11.8509	1000.33	25.5103	903.667	36.9925	97	3.4641	78	4.04145	1067	110.645	909	91.6752	96	12.0968	105	22.301	717.333	16.4958	709	68.7895	AT4G34880.1	Amidase family protein	LOC_Os04g10460.1	amidase, putative, expressed
Sobic.008G059400	Suscepible vs Resistant	5 10 15	Higher in Susceptible	392	207.667	6.74125	459.333	48.254	31.3333	3.4801	59.6667	4.8074	241.667	34.0898	245	57.5007	26.3333	4.48454	28.6667	2.66667	641	110.857	1163.33	240.024	149.333	8.74325	158.667	26.7727	AT1G77380.1	amino acid permease 3	LOC_Os12g08090.1	amino acid transporter, putative, expressed
Sobic.008G058400	Suscepible vs Resistant	5 10 15	Higher in Susceptible	392	126.333	3.66667	89	18.7172	0	0	5.66667	2.848	68.3333	21.8352	55.3333	11.893	5	2.64575	2.66667	2.66667	85	4.16333	29	0.57735	2	2	1.66667	1.66667	AT1G44100.1	amino acid permease 5	LOC_Os12g08090.1	amino acid transporter, putative, expressed
Sobic.007G088500	Suscepible vs Resistant	5 10 15	Higher in Susceptible	392	511.667	38.4028	500.667	38.8215	16.6667	3.75648	20.3333	4.48454	303.667	88.1293	421.667	97.3761	10.3333	1.33333	24.6667	4.70225	373	25.0067	296.667	68.1819	5.66667	2.848	7	1.1547	AT2G25010.1	Aminotransferase-like, plant mobile domain family protein	LOC_Os02g31860.1	expressed protein
Sobic.003G344700	Suscepible vs Resistant	5 10	Higher in Susceptible	198	40.3333	3.84419	33.3333	8.08977	7.33333	3.84419	11	1.73205	32.6667	4.70225	31.6667	1.45297	8.66667	1.45297	10	3.21455	15.3333	1.20185	5	2.88675	2.66667	2.66667	6.66667	0.881917	AT2G38290.1	ammonium transporter 2	LOC_Os01g61550.1	ammonium transporter protein, putative, expressed
Sobic.002G171001	Suscepible vs Resistant	5 10	Lower in Susceptible	161	2	2	2	2	20.3333	2.848	12.3333	1.45297	0	0	0	0	22.3333	1.20185	16	1.52753	7.66667	2.66667	2.66667	2.66667	11.6667	3.1798	9.33333	0.333333	AT4G19010.1	AMP-dependent synthetase and ligase family protein	LOC_Os10g42800.1	AMP-binding enzyme, putative, expressed
Sobic.006G247300	Suscepible vs Resistant	5 10	Lower in Susceptible	161	9	3	11.6667	3.4801	43	6.65833	43	6.02771	7.33333	3.71184	2.66667	2.66667	32.3333	3.52767	20	5	7.33333	1.45297	0	0	34	6.55744	27.3333	2.72845	AT4G23850.1	AMP-dependent synthetase and ligase family protein	LOC_Os01g48910.2	AMP-binding enzyme, putative, expressed
Sobic.001G137600	Suscepible vs Resistant	5	Higher in Susceptible	107	19	8.544	11.3333	1.66667	0	0	2	2	4.33333	4.33333	6.33333	3.1798	0	0	4.66667	2.4037	18.3333	2.72845	13.6667	5.54777	0	0	0	0	AT3G04710.2	ankyrin repeat family protein	LOC_Os03g47686.1	ankyrin, putative, expressed
Sobic.008G025200	Suscepible vs Resistant	10	Higher in Susceptible	115	8.66667	4.91031	23.3333	5.04425	0	0	0	0	14.3333	0.333333	26.3333	7.79601	0	0	0	0	7.66667	3.92994	17.6667	1.85592	0	0	0	0	AT3G04710.3	ankyrin repeat family protein	LOC_Os02g29140.1	ankyrin, putative, expressed
Sobic.004G149400	Suscepible vs Resistant	5 10	Higher in Susceptible	198	106.333	15.1694	131	18.1475	24	1.52753	20.3333	1.76383	92.6667	3.92994	124.333	9.82061	22	3.78594	17.3333	3.52767	145.333	4.17665	181	33.0454	32	11.5902	20.3333	3.75648	AT3G04710.1	ankyrin repeat family protein	LOC_Os08g13640.1	ankyrin, putative, expressed
Sobic.005G172100	Suscepible vs Resistant	5 10	Higher in Susceptible	198	21.6667	3.28295	9.33333	0.881917	0	0	0	0	18.6667	0.881917	7	0.57735	0	0	0	0	17.6667	2.848	11.3333	0.666667	1.66667	1.66667	5	2.51661	AT1G03670.1	ankyrin repeat family protein	LOC_Os07g09530.1	ankyrin repeat family protein, putative, expressed
Sobic.008G156500	Suscepible vs Resistant	5 10	Higher in Susceptible	198	65.3333	15.5063	37.6667	8.41295	3	3	2	2	41.6667	6.56591	12	4.16333	0	0	2.66667	2.66667	59	0.57735	31	11.8462	0	0	0	0	AT3G04710.3	ankyrin repeat family protein	LOC_Os12g40770.1	ankyrin-1, putative, expressed
Sobic.010G004500	Suscepible vs Resistant	5 10	Higher in Susceptible	198	24.3333	4.05518	52.6667	3.1798	2	2	2.66667	2.66667	25	4.50925	66	7.23418	4	2	6	3.4641	274	59.0706	705	92.4356	1.66667	1.66667	0	0	AT4G03460.1	Ankyrin repeat family protein	LOC_Os07g31070.1	expressed protein
Sobic.001G432500	Suscepible vs Resistant	10 15	Higher in Susceptible	200	85.3333	15.9199	177	37.9781	69.6667	14.8586	68.3333	3.84419	212.333	21.3099	360.333	122.38	64	8.544	76.6667	17.1497	115	9.53939	350	50.362	48.6667	8.08977	80	17.7858	AT4G11000.1	Ankyrin repeat family protein	LOC_Os03g15080.1	expressed protein
Sobic.001G432600	Suscepible vs Resistant	10 15	Higher in Susceptible	200	17.6667	2.33333	28.3333	11.6094	19.3333	2.33333	10.3333	2.96273	25.6667	4.91031	54	11.5326	10	2.08167	11.6667	4.40959	20	3.78594	74.3333	8.17177	12	3.78594	18.6667	2.33333	AT4G11000.1	Ankyrin repeat family protein	LOC_Os03g15080.1	expressed protein
Sobic.001G418400	Suscepible vs Resistant	5 10 15	Higher in Susceptible	392	75.6667	32.426	254	56.9298	8	4.04145	6	6	291.333	108.864	514	114	10	4	13.6667	4.09607	165	23.0651	403	67.0249	7.66667	4.33333	6.33333	0.666667	AT4G11000.1	Ankyrin repeat family protein	LOC_Os06g19110.1	cadmium tolerance factor, putative, expressed
Sobic.004G148600	Suscepible vs Resistant	5 10 15	Higher in Susceptible	392	97	7.37111	126.667	4.66667	4.66667	2.60342	4	2	71.6667	9.40449	119	15.5242	8.33333	4.63081	10	2.64575	131	14.7422	164.333	37.4448	0	0	3.33333	1.66667	AT3G04710.3	ankyrin repeat family protein	LOC_Os02g29140.1	ankyrin, putative, expressed
Sobic.005G208500	Suscepible vs Resistant	5	Lower in Susceptible	131	48	9.53939	72	24.7049	367.667	109.112	286.333	24.1684	146	54.7936	155	59.0706	442.667	91.6048	339.667	71.7085	77	13.5277	80	27.0062	237.667	35.648	379	38.9744	AT4G03440.1	Ankyrin repeat family protein	LOC_Os11g08020.1	ankyrin repeat family protein, putative, expressed
Sobic.002G324900	Suscepible vs Resistant	5 10	Lower in Susceptible	161	40.6667	5.23874	58	3.21455	187	24.0069	155.667	23.3333	41.3333	1.20185	58	8.32666	182.333	6.76593	146.333	5.17472	47.3333	5.60753	60.3333	7.2188	132.667	7.5351	151.333	15.3442	AT4G03460.1	Ankyrin repeat family protein	LOC_Os07g34830.1	ankyrin repeat family protein, putative, expressed
Sobic.005G229800	Suscepible vs Resistant	5 10	Lower in Susceptible	161	49	6.65833	67.6667	12.1974	231.333	25.4056	261.333	13.2204	37	3.4641	62.6667	8.74325	232	9.45163	232	14.5717	36.3333	2.96273	42.6667	10.651	221.333	7.83865	215	16.7432	AT4G03500.1	Ankyrin repeat family protein	LOC_Os09g15370.1	expressed protein
Sobic.004G132700	Suscepible vs Resistant	10 15	Lower in Susceptible	170	13.6667	2.90593	12.3333	3.75648	29.3333	3.75648	33	5.7735	12.6667	1.33333	2.66667	2.66667	37.6667	7.88106	37	2.3094	13.6667	1.76383	8	3	50.3333	3.71184	50.3333	4.8074	AT4G03500.1	Ankyrin repeat family protein	LOC_Os09g16160.1	ankyrin repeat family protein, putative, expressed
Sobic.005G063900	Suscepible vs Resistant	5 10 15	Lower in Susceptible	289	0	0	0	0	34	7.57188	18.6667	4.66667	0	0	0	0	22.3333	4.63081	23.6667	13.4205	1.66667	1.66667	0	0	17	4.93288	70.6667	23.9606	AT4G03500.1	Ankyrin repeat family protein	LOC_Os11g08020.1	ankyrin repeat family protein, putative, expressed
Sobic.004G172800	Suscepible vs Resistant	5 10 15	Lower in Susceptible	289	6	3.4641	7.33333	4.05518	102.333	11.1405	125	10.6927	0	0	5.66667	2.848	119.333	14.3798	123.667	4.17665	7.33333	1.20185	0	0	127.333	10.3333	131.667	10.8372	AT2G41370.1	Ankyrin repeat family protein / BTB/POZ domain-containing protein	LOC_Os07g33200.1	expressed protein
Sobic.001G489150	Suscepible vs Resistant	5 10 15	Higher in Susceptible	392	51.6667	5.84047	51.6667	8.33333	1.66667	1.66667	2	2	41.3333	1.33333	52.3333	3.1798	0	0	0	0	43	6.50641	47	6.245	0	0	1.66667	1.66667	AT1G35720.1	annexin 1	LOC_Os06g11800.1	annexin, putative, expressed
Sobic.001G367900	Suscepible vs Resistant	5 10 15	Higher in Susceptible	392	82.6667	9.9387	75.3333	3.84419	29.3333	2.02759	27.3333	4.66667	77	5.2915	55.6667	4.25572	25.3333	2.18581	28	5.03322	71.6667	3.28295	67.3333	8.25295	24.3333	1.85592	26.3333	4.37163	AT2G38760.1	annexin 3	LOC_Os05g31760.1	annexin, putative, expressed
Sobic.001G165000	Suscepible vs Resistant	5 10 15	Higher in Susceptible	392	311	24.7857	327.333	26.4218	12.3333	8.64741	8	5.2915	285	34.0196	352.333	64.7311	9.33333	2.02759	16.6667	8.41295	270	4.58258	256.333	21.5432	3.66667	1.85592	0	0	AT3G18990.1	AP2/B3-like transcriptional factor family protein	LOC_Os03g42410.1	B3 DNA binding domain containing protein
Sobic.008G148700	Suscepible vs Resistant	10	Lower in Susceptible	95	0	0	0	0	12.3333	4.05518	8.66667	1.76383	0	0	0	0	12.6667	1.66667	11.6667	0.881917	0	0	0	0	7.66667	3.92994	17	3	AT4G33280.1	AP2/B3-like transcriptional factor family protein	LOC_Os12g40080.1	B3 DNA binding domain containing protein, expressed
Sobic.002G314300	Suscepible vs Resistant	10 15	Higher in Susceptible	200	3130	625.709	1617.33	294.189	1900	252	873	354.898	6089.33	2925.86	2021	200.726	1403.67	326.814	644	55.3444	1831.33	30.0684	656.333	202.933	986.667	218.709	993.333	51.7472	AT4G21990.1	APS reductase 3	LOC_Os07g32570.1	OsAPRL1 adenosine 5\'-phosphosulfate reductase-like OsAPRL1, expressed
Sobic.005G099500	Suscepible vs Resistant	10	Higher in Susceptible	115	992.667	348.28	1056.33	399.985	1703.33	1049.84	458.333	139.196	3106.33	655.229	1476	838.057	738.667	214.736	1168.67	225.389	478	18.0093	1879.67	938.277	480.333	127.755	384.333	133.388	AT3G04080.1	apyrase 1	LOC_Os11g03290.1	nucleoside-triphosphatase, putative, expressed
Sobic.007G021200	Suscepible vs Resistant	5 10 15	Lower in Susceptible	289	17.6667	2.4037	28	6.245	47.6667	2.96273	57	10.9697	17.6667	4.17665	26	4.04145	50.3333	7.68838	61.6667	2.66667	22.6667	5.23874	22.3333	3.84419	57.6667	9.02466	49.6667	4.63081	AT2G17080.1	Arabidopsis protein of unknown function (DUF241)	LOC_Os08g43980.1	carrier, putative, expressed
Sobic.007G174900	Suscepible vs Resistant	5 10 15	Lower in Susceptible	289	22	1	20	2.08167	62.3333	3.84419	56.6667	12.1701	13.3333	3.1798	16	2.64575	63.3333	4.40959	69.6667	8.45248	19.6667	2.18581	24	5.2915	70.3333	2.848	80.6667	5.66667	AT2G17070.1	Arabidopsis protein of unknown function (DUF241)	LOC_Os08g43960.1	carrier, putative, expressed
Sobic.001G467700	Suscepible vs Resistant	5 10 15	Higher in Susceptible	392	195.667	31.866	270.333	66.0816	6.66667	1.20185	8.33333	4.40959	103.667	8.83805	207	35.0286	8	4.04145	9	0.57735	367.333	29.0765	320.667	77.9879	0	0	3.33333	1.66667	AT4G26300.1	Arginyl-tRNA synthetase, class Ic	LOC_Os05g07030.1	arginyl-tRNA synthetase, putative, expressed
Sobic.001G272900	Suscepible vs Resistant	10 15	Higher in Susceptible	200	15.3333	2.72845	24.6667	2.4037	5	2.64575	9.33333	1.76383	27	4.6188	36.6667	13.5442	6	3	3	3	17	2	79.6667	48.2367	4.33333	2.33333	8.66667	2.02759	AT5G37490.1	ARM repeat superfamily protein	LOC_Os10g03440.1	avr9/Cf-9 rapidly elicited protein 74, putative, expressed
Sobic.008G139000	Suscepible vs Resistant	5 10 15	Higher in Susceptible	392	718	35.5293	857.667	38.0102	166	2.88675	192	11.9304	856	98.3582	1115.33	82.6041	207.667	5.4569	229.667	18.5233	497	19.6977	797.667	182.305	241	29.3655	187.667	11.5662	AT5G18980.1	ARM repeat superfamily protein	LOC_Os12g18729.4	expressed protein
Sobic.003G366850	Suscepible vs Resistant	10 15	Lower in Susceptible	170	40	6	59.6667	7.83865	113.667	17.6761	118	12.3423	25	5.85947	49.3333	12.1701	104.667	22.1685	112.667	22.0177	48.3333	2.60342	65.3333	26.2953	142	9.53939	120	6.80686	AT3G05040.1	ARM repeat superfamily protein	LOC_Os11g31430.1	expressed protein
Sobic.010G105400	Suscepible vs Resistant	10 15	Lower in Susceptible	170	137	60.4759	48.3333	15.6241	83	44.2267	92.3333	42.4513	39	11.3578	18.3333	5.23874	136	57.7148	170.667	37.1319	177.667	9.52774	60.3333	24.9355	192.333	76.9964	169.667	22.9226	AT5G37630.1	ARM repeat superfamily protein	LOC_Os06g14460.1	chromosome condensation protein like, putative, expressed
Sobic.002G234900	Suscepible vs Resistant	10	Lower in Susceptible	95	0	0	0	0	16	1.52753	15.3333	2.4037	0	0	0	0	16.6667	2.4037	17.6667	0.333333	0	0	0	0	16.3333	1.85592	14.3333	0.881917	AT1G49670.2	ARP protein (REF)	LOC_Os09g28570.1	zinc-binding alcohol dehydrogenase domain-containing protein 2, putative, expressed
Sobic.004G114000	Suscepible vs Resistant	5 10	Higher in Susceptible	198	60.3333	3.28295	59.3333	5.4569	3	3	3	3	54.6667	7.4461	49.3333	4.63081	2	2	2.66667	2.66667	58.3333	1.66667	54	13.0128	0	0	1.66667	1.66667	AT2G17380.1	associated protein 19	LOC_Os03g57040.1	clathrin adaptor complex small chain domain containing protein, expressed
Sobic.003G103701	Suscepible vs Resistant	10	Lower in Susceptible	95	82.3333	24.7678	59.3333	12.7715	79.6667	8.29324	102	24.0069	20	5.19615	36.3333	12.3468	86	23.3524	120.333	34.3818	118.667	18.6756	133	32.7159	186.333	43.9596	219.667	24.6599	AT3G48190.1	ataxia-telangiectasia mutated	LOC_Os01g01689.1	phosphatidylinositol 3- and 4-kinase family protein, expressed
Sobic.003G267700	Suscepible vs Resistant	5	Lower in Susceptible	131	25.6667	3.1798	46	4.58258	89	15.9478	61.6667	7.51295	39	10.0664	144	41.0528	77.3333	16.9738	61.3333	2.4037	46.6667	4.91031	417.333	320.418	91.3333	5.20683	84.3333	1.45297	AT2G47000.1	ATP binding cassette subfamily B4	LOC_Os01g50160.1	MDR-like ABC transporter, putative, expressed
Sobic.010G265500	Suscepible vs Resistant	5 10 15	Higher in Susceptible	392	311.667	22.9298	287	26.3502	59	6.35085	70.3333	3.75648	371.667	126.856	269.667	81.405	48	4.72582	30	8.32666	132.333	5.696	138.333	24.037	18	2.08167	34	4.72582	AT4G00895.1	ATPase, F1 complex, OSCP/delta subunit protein	LOC_Os06g50070.1	expressed protein
Sobic.002G253800	Suscepible vs Resistant	10	Lower in Susceptible	95	35.3333	6.22718	29.3333	4.40959	54.3333	5.81187	53.6667	4.70225	16.3333	6.98411	47.6667	14.7686	50.3333	2.60342	58.6667	4.91031	27.3333	6.38575	51	5.50757	47.3333	1.85592	52	7.50555	AT3G21180.1	autoinhibited Ca(2+)-ATPase 9	LOC_Os04g51610.1	calcium-transporting ATPase, plasma membrane-type, putative, expressed
Sobic.004G102301	Suscepible vs Resistant	5 10 15	Higher in Susceptible	392	42.6667	8.98765	28.3333	4.05518	0	0	2	2	35.6667	11.4649	23	3.05505	2	2	0	0	38.3333	4.05518	38.3333	3.28295	1.66667	1.66667	0	0	AT2G28350.1	auxin response factor 10	LOC_Os04g43910.1	auxin response factor, putative, expressed
Sobic.002G361500	Suscepible vs Resistant	5	Higher in Susceptible	107	253.667	97.907	382	105.841	52	14	270.333	49.4177	126.333	22.063	540.333	138.398	47	12.49	52	14.4222	90.6667	5.04425	437.667	66.9735	34	12.53	57.3333	1.45297	AT4G37390.1	Auxin-responsive GH3 family protein	LOC_Os07g40290.1	OsGH3.8 - Probable indole-3-acetic acid-amido synthetase, expressed
Sobic.001G331200	Suscepible vs Resistant	10 15	Higher in Susceptible	200	21	6.08276	16.3333	4.40959	13.3333	0.881917	22.6667	9.68389	21.3333	3.4801	41.3333	17.3237	3	3	15.3333	2.60342	16	4.6188	32	11.9304	10	2.88675	7.33333	0.333333	AT4G37390.1	Auxin-responsive GH3 family protein	LOC_Os07g40290.1	OsGH3.8 - Probable indole-3-acetic acid-amido synthetase, expressed
Sobic.001G488600	Suscepible vs Resistant	5 10 15	Lower in Susceptible	289	33	3.51188	28.3333	0.666667	106.667	5.17472	99	11.9304	19.6667	2.33333	18.6667	2.72845	87.6667	16.7962	105.333	3.66667	30.3333	4.63081	25.3333	6.93622	87.3333	3.28295	97.3333	14.0752	AT3G47710.1	BANQUO 3	LOC_Os10g26460.1	bHLH family protein, putative, expressed
Sobic.004G094600	Suscepible vs Resistant	10	Higher in Susceptible	115	12	2.51661	19.3333	3.4801	16.3333	3.4801	9	4.58258	14	8.7178	19.3333	3.38296	2	2	7.66667	0.881917	15.3333	0.666667	13.3333	2.848	6	0.57735	18	10.5987	AT5G56960.1	basic helix-loop-helix (bHLH) DNA-binding family protein	LOC_Os02g12820.1	helix-loop-helix DNA-binding domain containing protein, expressed
Sobic.009G073500	Suscepible vs Resistant	10 15	Higher in Susceptible	200	26.3333	6.33333	51	11.5326	23	5.1316	7	3.78594	39	9.86577	61.3333	20.8513	14	2.08167	17	2.64575	209	75.7452	164	61.825	30.3333	4.25572	51.3333	5.36449	AT5G56960.1	basic helix-loop-helix (bHLH) DNA-binding family protein	LOC_Os05g11070.1	helix-loop-helix DNA-binding domain containing protein, expressed
Sobic.007G183200	Suscepible vs Resistant	10 15	Lower in Susceptible	170	11.3333	1.66667	13	1.52753	21.3333	3.66667	19	3.51188	14.6667	2.18581	18.3333	1.76383	39.3333	7.2188	15.6667	2.4037	13.3333	2.02759	14	1.52753	21.3333	6.11919	23	1.52753	AT1G32640.1	Basic helix-loop-helix (bHLH) DNA-binding family protein	LOC_Os09g34330.1	helix-loop-helix DNA-binding domain containing protein, expressed
Sobic.001G271100	Suscepible vs Resistant	5 10	Higher in Susceptible	198	44.3333	2.72845	53.3333	13.3458	0	0	2	2	32.3333	11.2891	40.6667	5.48736	0	0	0	0	42	6.02771	36.3333	2.4037	0	0	0	0	AT1G68810.1	basic helix-loop-helix (bHLH) DNA-binding superfamily protein	LOC_Os08g33590.1	basic helix-loop-helix, putative, expressed
Sobic.004G270900	Suscepible vs Resistant	5 10	Higher in Susceptible	198	47.6667	3.75648	45.3333	3.84419	11.6667	2.66667	9.33333	4.66667	27.6667	10.4775	33	11.6762	7	1	9.33333	4.70225	36.6667	4.91031	27.6667	2.72845	15.3333	1.85592	10	1	AT1G06170.1	basic helix-loop-helix (bHLH) DNA-binding superfamily protein	LOC_Os04g51070.1	helix-loop-helix DNA-binding domain containing protein, expressed
Sobic.003G273200	Suscepible vs Resistant	10 15	Higher in Susceptible	200	85	16.6533	121	22.5389	31.3333	3.1798	33.3333	0.333333	136.333	19.5306	220.667	38.2201	34.3333	3.52767	36	4	53	4.16333	164.333	15.5599	29.3333	2.33333	26.6667	4.70225	AT3G21330.1	basic helix-loop-helix (bHLH) DNA-binding superfamily protein	LOC_Os01g51140.2	helix-loop-helix DNA-binding domain containing protein, expressed
Sobic.010G152700	Suscepible vs Resistant	10	Lower in Susceptible	95	14.6667	7.88106	2.66667	2.66667	8.66667	5.92546	9.33333	5.81187	0	0	2	2	14.3333	7.83865	21.3333	4.63081	12.3333	1.33333	11.6667	5.84047	18	10.3923	11.6667	1.33333	AT5G53210.1	basic helix-loop-helix (bHLH) DNA-binding superfamily protein	LOC_Os06g33450.2	helix-loop-helix DNA-binding domain containing protein, expressed
Sobic.001G095700	Suscepible vs Resistant	5	Lower in Susceptible	131	58.6667	10.7134	1071	599.287	340.667	96.7632	316.667	118.339	114	68.0098	1755	1526.07	108.333	14.4029	83	5.1316	139.333	55.2338	418.667	75.4593	592.333	215.172	242.667	57.5162	AT5G43650.1	basic helix-loop-helix (bHLH) DNA-binding superfamily protein	LOC_Os03g53020.1	helix-loop-helix DNA-binding domain containing protein, expressed
Sobic.003G428800	Suscepible vs Resistant	5	Lower in Susceptible	131	168.333	51.1935	2483	1866.17	8725.67	5821.13	3392.33	2267.88	8216	6781.86	4248	2446.8	15903.7	1516.89	4063.33	2942.58	1786.33	554.333	405.667	243.211	4153.33	2343.14	1796	1390.28	AT3G56970.1	basic helix-loop-helix (bHLH) DNA-binding superfamily protein	LOC_Os01g72370.2	helix-loop-helix DNA-binding domain containing protein, expressed
Sobic.007G051800	Suscepible vs Resistant	5	Lower in Susceptible	131	28	5.50757	269.667	116.006	210.333	38.1678	173.667	77.9537	40.3333	8.56997	441	379.513	44.6667	12.3333	15	2.51661	68.6667	31.6877	126.333	29.4637	457.333	141.238	71.6667	8.51143	AT5G57150.1	basic helix-loop-helix (bHLH) DNA-binding superfamily protein	LOC_Os04g23550.1	basic helix-loop-helix family protein, putative, expressed
Sobic.009G187900	Suscepible vs Resistant	5 10	Lower in Susceptible	161	11.6667	2.848	25.6667	3.84419	37.6667	1.45297	46.3333	6.9602	5.33333	2.90593	25.3333	8.00694	35.6667	19.6497	39.3333	7.26483	17.3333	1.33333	24.6667	2.848	37	2.51661	38.6667	11.0504	AT1G61660.1	basic helix-loop-helix (bHLH) DNA-binding superfamily protein	LOC_Os05g42180.1	ethylene-responsive protein related, putative, expressed
Sobic.001G476500	Suscepible vs Resistant	10 15	Lower in Susceptible	170	15	8.96289	8.66667	1.45297	18.6667	4.70225	14.3333	3.1798	8.66667	4.37163	2.33333	2.33333	28	4.04145	18.6667	0.666667	10	5.50757	5.33333	5.33333	15	4.72582	8.66667	0.333333	AT1G72210.1	basic helix-loop-helix (bHLH) DNA-binding superfamily protein	LOC_Os03g08930.1	helix-loop-helix DNA-binding protein, putative, expressed
Sobic.006G259800	Suscepible vs Resistant	5 10 15	Lower in Susceptible	289	7.66667	3.84419	9.33333	4.8074	203.667	9.90511	169.333	9.02466	4	4	5.33333	2.90593	194	10.5357	207.333	8.11035	6.33333	3.1798	1.66667	1.66667	220.333	5.78312	207.333	10.4934	AT3G26744.2	basic helix-loop-helix (bHLH) DNA-binding superfamily protein	LOC_Os01g70310.1	inducer of CBF expression 2, putative, expressed
Sobic.002G114000	Suscepible vs Resistant	5	Higher in Susceptible	107	279.667	88.2522	108.667	62.1727	54	5.2915	70	13.6504	68.3333	8.45248	48.6667	6.00925	89	4.04145	49.3333	7.17248	67	15.5242	234	179.093	75.6667	7.17248	53.6667	2.4037	AT2G01930.1	basic pentacysteine1	LOC_Os10g02584.3	GAGA-binding protein, putative, expressed
Sobic.004G200866	Suscepible vs Resistant	5 10 15	Higher in Susceptible	392	179	18	185.333	26.3965	12	1.52753	12	3.21455	106.667	14.0989	147	25.0067	8	4.3589	9.66667	4.84195	175.333	7.85988	154.333	5.4569	11	3	10	1.73205	AT3G56660.1	basic region/leucine zipper motif protein 49	LOC_Os05g34050.1	bZIP transcription factor domain containing protein, expressed
Sobic.006G068400	Suscepible vs Resistant	5 10	Higher in Susceptible	198	421.667	30.5632	538.667	37.8609	30.6667	8.29324	38.6667	9.17121	296	149.617	474.667	148.282	23.3333	2.90593	32.3333	4.70225	362	48.5833	392.667	53.2989	31.3333	2.60342	23.3333	5.36449	AT1G17450.2	B-block binding subunit of TFIIIC	LOC_Os02g42200.1	transcription factor-related, putative, expressed
Sobic.004G116300	Suscepible vs Resistant	10	Lower in Susceptible	95	402.333	45.9577	560	143.628	1450.67	54.6636	1358.67	45.7323	310.333	34.2264	344	47.2899	1937.67	178.645	1712.67	121.806	336.667	38.7356	490	137.42	2129	46.2925	1282.33	112.609	AT2G46240.1	BCL-2-associated athanogene 6	LOC_Os02g15930.1	expressed protein
Sobic.002G190400	Suscepible vs Resistant	5 10	Higher in Susceptible	198	47	7.37111	39.6667	0.881917	0	0	2	2	36.3333	3.84419	17.3333	3.71184	0	0	0	0	33.3333	4.25572	13	3.21455	0	0	0	0	AT3G42170.1	BED zinc finger ;hAT family dimerisation domain	LOC_Os09g21420.1	transposon protein, putative, unclassified, expressed
Sobic.009G102000	Suscepible vs Resistant	5 10	Higher in Susceptible	198	264.333	20.4315	268.667	7.9652	8.33333	6.00925	11.3333	7.31057	287.667	28.591	329.667	33.9329	6.66667	3.38296	12.6667	2.60342	272.667	13.691	260.667	29.3844	0	0	0	0	AT3G42170.1	BED zinc finger ;hAT family dimerisation domain	LOC_Os01g32640.1	OsFBX9 - F-box domain containing protein, expressed
Sobic.002G190200	Suscepible vs Resistant	5 10 15	Lower in Susceptible	289	3	3	0	0	35.6667	4.40959	38.3333	8.95048	2	2	5.66667	2.848	28.3333	7.9652	63	18.23	0	0	0	0	50.3333	13.5442	38.3333	13.9084	AT3G42170.1	BED zinc finger ;hAT family dimerisation domain	LOC_Os09g21420.1	transposon protein, putative, unclassified, expressed
Sobic.006G117400	Suscepible vs Resistant	10 15	Higher in Susceptible	200	12	6	57.3333	8.21246	7.66667	0.881917	6	0	28	9.86577	51.3333	3.84419	6.66667	3.38296	3.66667	3.66667	76.3333	23.9537	46.3333	7.17248	8.33333	6.00925	15.3333	0.333333	AT5G42260.1	beta glucosidase 12	LOC_Os04g39880.1	Os4bglu12 - beta-glucosidase, exo-beta-glucanase, expressed
Sobic.006G117100	Suscepible vs Resistant	5 10 15	Higher in Susceptible	392	34.6667	2.66667	36.6667	4.25572	10	4.50925	10.6667	2.4037	71	6.4291	45.6667	8.41295	10	4	10	2	53.6667	8.41295	37.3333	4.70225	5	2.88675	11	2.3094	AT5G44640.1	beta glucosidase 13	LOC_Os04g39880.1	Os4bglu12 - beta-glucosidase, exo-beta-glucanase, expressed
Sobic.010G132400	Suscepible vs Resistant	5	Higher in Susceptible	107	27.6667	3.1798	13	1.73205	9.33333	0.881917	8.33333	1.20185	10	3.51188	12.3333	4.84195	8.66667	4.48454	13	2.64575	29.3333	3.92994	7.66667	4.97773	6	3.05505	8.33333	3.33333	AT2G44480.1	beta glucosidase 17	LOC_Os06g21570.1	Os6bglu24 - beta-glucosidase homologue, similar to G. max isohydroxyurate hydrolase, expressed
Sobic.006G145300	Suscepible vs Resistant	10	Lower in Susceptible	95	10	1	11.6667	1.85592	21.6667	5.54777	25.3333	4.48454	10.6667	2.90593	6.33333	3.28295	29.6667	4.91031	22	4.58258	9.33333	0.881917	14.3333	4.40959	39	8.14453	39.3333	4.05518	AT1G61820.1	beta glucosidase 46	LOC_Os04g43360.1	Os4bglu14 - monolignol beta-glucoside homologue without catalytic acid/base, expressed
Sobic.006G145600	Suscepible vs Resistant	5	Lower in Susceptible	131	74.6667	6.43774	60	33.5311	294.333	129.079	263.333	62.2075	94.3333	13.8363	24	2.88675	233.667	19.936	231.333	29.1795	64	6.4291	22.3333	5.78312	191.667	22.1008	141.333	21.682	AT1G61820.1	beta glucosidase 46	LOC_Os04g43390.2	Os4bglu16 - monolignol beta-glucoside homologue, expressed
Sobic.006G145700	Suscepible vs Resistant	5	Lower in Susceptible	131	16	5.56776	32.3333	8.25295	75	29.023	50	12.4231	50.3333	2.848	75	10.116	84.6667	19.1949	70	14.4684	50.6667	3.28295	32	4.58258	85.6667	24.0093	72.3333	4.66667	AT1G61820.1	beta glucosidase 46	LOC_Os04g43360.1	Os4bglu14 - monolignol beta-glucoside homologue without catalytic acid/base, expressed
Sobic.003G421500	Suscepible vs Resistant	5 10 15	Lower in Susceptible	289	11.3333	3.1798	11	1.52753	83.3333	11.2151	64	4.04145	9	1	8	0.57735	49	8.5049	57.6667	12.6798	2.33333	2.33333	4.66667	2.4037	87.6667	27.7148	133.667	68.0817	AT3G57240.1	beta-1,3-glucanase 3	LOC_Os01g71340.1	glycosyl hydrolases family 17, putative, expressed
Sobic.006G255500	Suscepible vs Resistant	5	Lower in Susceptible	131	17.3333	4.40959	29.6667	3.75648	70.3333	10.3976	140.667	20.5372	12	2.64575	43.3333	15.899	25.6667	4.05518	57.6667	7.5351	32	2.64575	137.333	37.8432	264	45.5302	220.667	40.1345	AT1G55120.1	beta-fructofuranosidase 5	LOC_Os09g08072.1	glycosyl hydrolases, putative, expressed
Sobic.006G255400	Suscepible vs Resistant	5 10 15	Lower in Susceptible	289	15.3333	0.881917	11.3333	0.881917	50.3333	0.881917	52.6667	4.48454	11.6667	2.60342	27.3333	1.20185	50.6667	6.00925	45.3333	3.1798	14.3333	0.666667	35	3.78594	42.3333	6.48931	40.3333	1.76383	AT1G55120.1	beta-fructofuranosidase 5	LOC_Os04g56920.1	glycosyl hydrolases, putative, expressed
Sobic.005G222400	Suscepible vs Resistant	10 15	Lower in Susceptible	170	14	0.57735	14	4.16333	30.6667	7.05534	33.3333	5.54777	15	2.64575	0	0	39.3333	11.9768	37.6667	6.64162	37.6667	1.76383	11	2.08167	51.3333	20.407	36	9.84886	AT5G65940.1	beta-hydroxyisobutyryl-CoA hydrolase 1	LOC_Os12g16350.1	enoyl-CoA hydratase/isomerase family protein, putative, expressed
Sobic.010G124900	Suscepible vs Resistant	5 10 15	Higher in Susceptible	392	196.667	11.2002	98	23.5018	49	10.5987	46	8.18535	244.333	113.76	29.3333	3.84419	49	6.02771	26	3.21455	159.333	9.20748	19	9.50438	30	7.0946	36	3.60555	AT1G67730.1	beta-ketoacyl reductase 1	LOC_Os04g02620.1	oxidoreductase, short chain dehydrogenase/reductase family, putative, expressed
Sobic.003G422400	Suscepible vs Resistant	10	Higher in Susceptible	115	25	7.54983	55	3.60555	12.3333	3.71184	14	4	41	2.08167	59.3333	1.45297	11.6667	3.4801	11	1.73205	63.3333	3.28295	92.3333	7.17248	16	2.08167	21	1.52753	AT2G01170.1	bidirectional amino acid transporter 1	LOC_Os01g71740.1	amino acid permease family protein, putative, expressed
Sobic.009G221900	Suscepible vs Resistant	10	Higher in Susceptible	115	1204.33	158.453	1017.67	118.102	491	124.069	383	131.196	1834	290.128	385.667	58.2132	317	52.5484	243.333	14.9481	866.667	42.4356	413.667	193.77	350	36.9098	355	8.32666	AT3G18280.1	Bifunctional inhibitor/lipid-transfer protein/seed storage 2S albumin superfamily protein	LOC_Os05g47700.1	LTPL152 - Protease inhibitor/seed storage/LTP family protein precursor, expressed
Sobic.006G211701	Suscepible vs Resistant	10 15	Higher in Susceptible	200	1852	158.324	1293.33	288.777	498.333	113.329	706.333	187.777	1086	485.346	469	234.429	243.667	42.9819	347.667	71.8896	3485.67	526.966	2175	1071.03	1914.67	97.3727	2011.67	405.973	AT3G22142.1	Bifunctional inhibitor/lipid-transfer protein/seed storage 2S albumin superfamily protein	LOC_Os04g52260.1	LTPL124 - Protease inhibitor/seed storage/LTP family protein precursor, expressed
Sobic.010G159500	Suscepible vs Resistant	5 10 15	Higher in Susceptible	392	242	56.0446	376	70.5053	30	2.51661	56.6667	0.666667	455.667	84.2958	669.667	202.172	32	5.68624	45	6.02771	496.667	98.0142	678	76.6312	38.6667	3.84419	58	7.81025	AT2G18370.1	Bifunctional inhibitor/lipid-transfer protein/seed storage 2S albumin superfamily protein	LOC_Os06g34840.1	LTPL5 - Protease inhibitor/seed storage/LTP family protein precursor, putative, expressed
Sobic.009G180100	Suscepible vs Resistant	10	Lower in Susceptible	95	9.66667	2.02759	29.3333	6.98411	15.3333	5.36449	36.3333	7.05534	6.66667	3.75648	36.6667	12.7192	24.3333	4.40959	32	9.16515	18.3333	3.84419	46.6667	2.4037	23.6667	4.91031	26.6667	6.88799	AT1G03103.1	Bifunctional inhibitor/lipid-transfer protein/seed storage 2S albumin superfamily protein	LOC_Os02g49280.1	LTPL50 - Protease inhibitor/seed storage/LTP family protein precursor, putative, expressed
Sobic.005G046700	Suscepible vs Resistant	5 10 15	Lower in Susceptible	289	55	7.2111	31	14.1892	185	81.5864	429.667	211.852	28.3333	8.00694	15	12.1244	116	55.6776	111	1	64.6667	25.2477	13	4.16333	160	63.7887	104	23.4592	AT5G46900.1	Bifunctional inhibitor/lipid-transfer protein/seed storage 2S albumin superfamily protein	LOC_Os10g40460.1	LTPL141 - Protease inhibitor/seed storage/LTP family protein precursor, expressed
Sobic.008G123400	Suscepible vs Resistant	5	Higher in Susceptible	107	182.667	66.799	63.3333	19.8018	40.6667	16.3333	42	10.116	61.6667	9.76957	24.3333	2.60342	55.3333	19.7174	68.6667	14.9034	194.667	22.5856	55.3333	19.0992	73	23.6925	66.3333	13.2204	AT4G15890.1	binding	LOC_Os12g36170.1	HEAT repeat family protein, putative, expressed
Sobic.003G420600	Suscepible vs Resistant	5	Higher in Susceptible	107	45	1.52753	59.3333	6.64162	17	0	14.3333	4.91031	36.6667	8.41295	50	11.5036	18.6667	1.85592	14	1.52753	47.6667	3.84419	48.3333	5.23874	25.6667	6.74125	15.3333	3.4801	AT4G03130.1	BRCT domain-containing DNA repair protein	LOC_Os01g71256.1	expressed protein
Sobic.001G504700	Suscepible vs Resistant	5 10 15	Higher in Susceptible	392	27	1.1547	36.6667	1.20185	3	3	0	0	27	7.50555	49.6667	9.68389	0	0	0	0	25.3333	4.25572	40.6667	11.2002	0	0	0	0	AT1G69030.1	BSD domain-containing protein	LOC_Os02g49450.1	BSD domain-containing protein, putative, expressed
Sobic.001G181800	Suscepible vs Resistant	5 10	Higher in Susceptible	198	49.6667	4.97773	35.6667	1.76383	3.66667	3.66667	2.66667	2.66667	32.6667	5.78312	20.6667	1.20185	0	0	0	0	46.6667	2.90593	40.3333	6.43774	0	0	0	0	AT5G19000.1	BTB-POZ and MATH domain 1	LOC_Os10g29230.1	MBTB49 - Bric-a-Brac, Tramtrack, Broad Complex BTB domain with Meprin and TRAF Homology MATH domain, expressed
Sobic.005G190900	Suscepible vs Resistant	5 10 15	Higher in Susceptible	392	171.667	34.3624	530.333	93.8231	22.6667	4.25572	104	14.7422	135	11.1355	461	220.35	17.3333	3.1798	72.3333	20.1853	77	8.18535	212	75.6593	19.6667	7.12585	27	11.1355	AT5G19000.1	BTB-POZ and MATH domain 1	LOC_Os11g40680.1	MBTB64 - Bric-a-Brac, Tramtrack, Broad Complex BTB domain with Meprin and TRAF Homology MATH domain, expressed
Sobic.001G246200	Suscepible vs Resistant	5 10 15	Lower in Susceptible	289	2	2	2	2	40.6667	3.1798	47.6667	5.4569	3.33333	3.33333	0	0	40.6667	6.76593	48.6667	6.35959	1.66667	1.66667	7.33333	2.33333	66	8.0829	69	12.49	AT5G19000.1	BTB-POZ and MATH domain 1	LOC_Os10g29230.1	MBTB49 - Bric-a-Brac, Tramtrack, Broad Complex BTB domain with Meprin and TRAF Homology MATH domain, expressed
Sobic.007G080900	Suscepible vs Resistant	5 10 15	Higher in Susceptible	392	65.3333	1.85592	61.3333	10.8985	0	0	7.33333	0.666667	66	14	68	9.29157	2	2	7.66667	4.09607	62.3333	0.666667	37	6.65833	6	3.05505	8.66667	0.881917	AT3G06190.1	BTB-POZ and MATH domain 2	LOC_Os08g13070.1	MBTB23 - Bric-a-Brac, Tramtrack, Broad Complex BTB domain with Meprin and TRAF Homology MATH domain, expressed
Sobic.009G197300	Suscepible vs Resistant	5 10 15	Higher in Susceptible	392	4315.67	1135.42	4956.33	679.119	98.3333	56.8692	63.3333	33.1981	3194	1029.01	2232.67	678.56	76	33.8575	72.3333	15.3768	10457	1367.36	4701	2168.2	11	5.85947	14.3333	2.848	AT5G25610.1	BURP domain-containing protein	LOC_Os06g17000.1	BURP domain containing protein, expressed
Sobic.008G157500	Suscepible vs Resistant	10 15	Lower in Susceptible	170	6	0	5.66667	3.1798	21	4.72582	29.6667	8.95048	4.33333	2.18581	4	2	36	7.50555	23	3.78594	3.33333	1.66667	8	1.1547	20.6667	5.17472	20	5.19615	AT5G25610.1	BURP domain-containing protein	LOC_Os01g53240.1	BURP domain containing protein, expressed
Sobic.008G157700	Suscepible vs Resistant	10 15	Lower in Susceptible	170	24.3333	0.333333	19.3333	2.60342	53.3333	5.36449	65.6667	3.38296	26.3333	6.83943	29	1.52753	75.6667	10.3333	67.6667	3.92994	19.6667	1.76383	6	3.4641	57.6667	4.97773	56	5.50757	AT5G25610.1	BURP domain-containing protein	LOC_Os08g38810.1	BURP domain containing protein, expressed
Sobic.002G247300	Suscepible vs Resistant	10	Higher in Susceptible	115	14	7.0946	31.6667	10.651	12.6667	4.33333	13	3.51188	26.6667	5.4569	42.6667	4.66667	8.66667	1.45297	14.6667	1.76383	33.6667	8.56997	76.6667	22.7327	11.6667	0.881917	15.6667	2.18581	AT5G06839.3	bZIP transcription factor family protein	LOC_Os09g31390.1	transcription factor, putative, expressed
Sobic.006G015600	Suscepible vs Resistant	10 15	Higher in Susceptible	200	45.6667	0.881917	46.6667	2.848	26.3333	5.84047	26	2.64575	57.3333	2.4037	40.6667	4.97773	20.3333	4.17665	17.3333	1.20185	48.6667	2.96273	40.6667	6.88799	16.6667	2.18581	19.3333	0.881917	AT5G03510.1	C2H2-type zinc finger family protein	LOC_Os04g08060.1	ZOS4-03 - C2H2 zinc finger protein, expressed
Sobic.003G106600	Suscepible vs Resistant	5 10	Lower in Susceptible	161	7.66667	4.97773	6.66667	4.05518	146	3.4641	206	9.45163	3.33333	3.33333	9.66667	5.23874	176.667	20.8353	266	45.2806	8.33333	2.02759	1.66667	1.66667	191	21.9621	216	15.5242	AT1G20050.1	C-8,7 sterol isomerase	LOC_Os01g01369.1	3-beta-hydroxysteroid-Delta-isomerase, putative, expressed
Sobic.010G064500	Suscepible vs Resistant	5 10 15	Higher in Susceptible	392	146	5.2915	167.333	11.8369	15	2.64575	18	0.57735	132.333	2.02759	179.667	3.71184	13	1.52753	14	1.73205	146	2	168	22.5906	14	3.78594	13	3.05505	AT5G58200.2	Calcineurin-like metallo-phosphoesterase superfamily protein	LOC_Os06g08390.1	Ser/Thr protein phosphatase family protein, putative, expressed
Sobic.007G214600	Suscepible vs Resistant	10	Higher in Susceptible	115	26.3333	5.81187	13.6667	2.33333	4	4	7.66667	1.66667	30.3333	9.83757	6	3.4641	10.6667	0.881917	9.66667	1.20185	23.6667	3.38296	8.66667	4.37163	9	1	7.33333	1.45297	AT2G44310.1	Calcium-binding EF-hand family protein	LOC_Os09g31040.1	EF hand family protein, putative, expressed
Sobic.002G376900	Suscepible vs Resistant	10 15	Higher in Susceptible	200	597.333	113.357	867	28.3784	313	52.5738	430.667	60.3112	801.667	231.15	820.667	194.471	194	61.3705	261.667	13.9084	417	39.8873	740	109.275	276.667	27.3882	292.333	29.9017	AT3G59440.1	Calcium-binding EF-hand family protein	LOC_Os03g27790.1	EF hand family protein, putative
Sobic.004G146100	Suscepible vs Resistant	5 10 15	Higher in Susceptible	392	168	10.583	170.333	11.2891	6.66667	4.40959	4.66667	4.66667	107.333	20.1853	116.667	22.3632	2	2	7	3.78594	118.667	7.35603	104.333	9.35117	0	0	0	0	AT3G19830.1	Calcium-dependent lipid-binding (CaLB domain) family protein	LOC_Os02g58230.1	C2 domain containing protein, putative, expressed
Sobic.005G029400	Suscepible vs Resistant	5 10 15	Lower in Susceptible	289	13.3333	2.18581	7.66667	0.881917	80.3333	2.96273	54	8.3865	11.3333	0.881917	11.3333	0.881917	53.6667	2.4037	56.6667	1.33333	9.33333	0.666667	1.66667	1.66667	50.6667	1.45297	39.3333	1.85592	AT3G57030.1	Calcium-dependent phosphotriesterase superfamily protein	LOC_Os11g04660.1	strictosidine synthase, putative, expressed
Sobic.001G283900	Suscepible vs Resistant	5 10	Lower in Susceptible	161	0	0	2	2	27.6667	0.881917	33	5.19615	0	0	0	0	28.6667	1.66667	30.3333	2.96273	0	0	0	0	46	2.51661	43	2	AT4G38230.3	calcium-dependent protein kinase 26	LOC_Os04g49510.1	CAMK_CAMK_like.27 - CAMK includes calcium/calmodulin depedent protein kinases, expressed
Sobic.010G104600	Suscepible vs Resistant	5 10	Higher in Susceptible	198	24.3333	4.84195	60.3333	21.1844	3	3	4	2	57	15.5242	458.333	137.71	9.33333	2.02759	5.66667	2.848	55.6667	8.56997	616	354.03	9.33333	4.33333	8.33333	2.4037	AT1G70670.1	Caleosin-related family protein	LOC_Os06g14324.1	caleosin related protein, putative, expressed
Sobic.001G452200	Suscepible vs Resistant	10 15	Higher in Susceptible	200	14.3333	3.52767	12	6.02771	6	3.4641	0	0	16.6667	2.96273	30	9.84886	2	2	0	0	9	2.64575	19.6667	5.78312	0	0	0	0	AT2G33380.1	Caleosin-related family protein	LOC_Os03g12230.1	caleosin related protein, putative, expressed
Sobic.001G383800	Suscepible vs Resistant	5 10	Lower in Susceptible	161	7	1	6.33333	3.28295	37.6667	3.28295	40.6667	8.35331	8	4.16333	7	3.51188	35	1.73205	32	6.50641	8	4.04145	5.33333	2.66667	23.6667	1.20185	40.3333	8.21246	AT4G20780.1	calmodulin like 42	LOC_Os03g21380.1	OsCML27 - Calmodulin-related calcium sensor protein, expressed
Sobic.004G187000	Suscepible vs Resistant	5 10 15	Lower in Susceptible	289	10	1	16	5.50757	175	8.73689	195.333	8.95048	8	4.16333	11.6667	2.4037	259.333	33.7359	234.667	23.3548	14.3333	1.76383	9.33333	2.18581	195.667	17.3333	187	12.4231	AT4G25800.2	Calmodulin-binding protein	LOC_Os11g44310.1	calmodulin binding protein, putative, expressed
Sobic.009G136300	Suscepible vs Resistant	5 10 15	Lower in Susceptible	289	9.33333	0.881917	8	4.6188	38	8.5049	34	13.0512	2.33333	2.33333	7	3.51188	34	1.52753	23	2.64575	6	3.78594	8.66667	1.76383	34	3	33	4.72582	AT5G16080.1	carboxyesterase 17	LOC_Os05g33940.1	alpha/beta hydrolase fold, putative, expressed
Sobic.002G168700	Suscepible vs Resistant	10 15	Higher in Susceptible	200	16.6667	1.20185	8.33333	2.33333	1.66667	1.66667	2	2	20.3333	2.60342	16.6667	4.91031	0	0	2.66667	2.66667	19	4.16333	9.33333	1.33333	0	0	1.66667	1.66667	AT3G63520.1	carotenoid cleavage dioxygenase 1	LOC_Os09g15240.1	carotenoid cleavage dioxygenase, putative, expressed
Sobic.005G002500	Suscepible vs Resistant	5 10 15	Lower in Susceptible	289	25.6667	4.70225	23.6667	3.75648	92.6667	0.666667	108	17.7858	23.6667	2.90593	19.6667	5.36449	84.6667	6.11919	95.6667	3.4801	17	1.1547	12.3333	2.18581	68.6667	4.70225	79	1.1547	AT4G32810.1	carotenoid cleavage dioxygenase 8	LOC_Os01g38580.2	beta,beta-carotene 9,10-dioxygenase, putative, expressed
Sobic.003G376300	Suscepible vs Resistant	5 10	Lower in Susceptible	161	2	2	9	4.50925	20.3333	3.1798	16	7.50555	7	3.51188	7	0.57735	25.6667	6.56591	15.6667	2.33333	8	4.3589	8.66667	0.666667	27	4.93288	25	7.50555	AT4G15093.1	catalytic LigB subunit of aromatic ring-opening dioxygenase family	LOC_Os01g65680.1	4,5-DOPA dioxygenase extradiol, putative, expressed
Sobic.001G027900	Suscepible vs Resistant	10	Higher in Susceptible	115	34.6667	4.8074	35	10.3923	14.3333	3.92994	14.6667	3.1798	53	6	24	4.3589	11	5.85947	12	3.60555	24.6667	2.848	20.3333	4.09607	10	1.1547	14.6667	0.666667	AT3G17630.1	cation/H+ exchanger 19	LOC_Os03g61290.1	ATCHX, putative, expressed
Sobic.008G016200	Suscepible vs Resistant	10	Lower in Susceptible	95	789.667	70.3144	669.333	43.5367	2452.67	310.165	2125.33	284.405	562	233.123	430.667	132.471	3072.33	500.528	2651.67	84.1315	378.667	9.56266	244.667	66.2328	1142	110.49	871.667	8.45248	AT2G26980.4	CBL-interacting protein kinase 3	LOC_Os12g03810.2	CAMK_KIN1/SNF1/Nim1_like.37 - CAMK includes calcium/calmodulin depedent protein kinases, expressed
Sobic.002G237900	Suscepible vs Resistant	5 10 15	Lower in Susceptible	289	1078.33	227.208	1582	109.092	8139	1447.01	6154.33	308.913	1644	316.64	2575	584.365	12333.7	1653.76	6560	579.532	912.333	187.262	639.333	198.227	3501	376.24	1403.67	227.171	AT1G55850.1	cellulose synthase like E1	LOC_Os09g30130.1	CSLE6 - cellulose synthase-like family E, expressed
Sobic.010G146000	Suscepible vs Resistant	5 10	Higher in Susceptible	198	55.6667	34.2604	113.333	55.3785	1.66667	1.66667	2.66667	2.66667	29.6667	5.20683	222.667	128.043	0	0	0	0	13	3	58	11.0151	0	0	0	0	AT2G33100.1	cellulose synthase-like D1	LOC_Os06g22980.1	CSLD5 - cellulose synthase-like family D, expressed
Sobic.004G179000	Suscepible vs Resistant	5	Higher in Susceptible	107	32.3333	5.23874	28.6667	2.848	11.3333	2.02759	11.6667	0.881917	24.3333	4.8074	30	10.116	10	2.08167	19.3333	7.51295	23	2.08167	35	2.88675	10.3333	2.02759	11	1.1547	AT5G13930.1	Chalcone and stilbene synthase family protein	LOC_Os07g31770.1	chalcone synthase, putative, expressed
Sobic.005G102100	Suscepible vs Resistant	10	Higher in Susceptible	115	255.333	33.2282	114.333	36.5574	106.333	25.0954	89.6667	20.9152	427	58.8756	20.3333	10.5883	121.667	8.83805	76.3333	9.33333	128.333	6.11919	19.6667	4.91031	81.3333	28.0852	54.3333	4.33333	AT5G13930.1	Chalcone and stilbene synthase family protein	LOC_Os04g01354.1	chalcone synthase, putative, expressed
Sobic.007G058900	Suscepible vs Resistant	10 15	Higher in Susceptible	200	1041.67	324.49	2879.67	896.039	399.667	154.766	159.333	27.8468	2001.33	565.888	2556.67	480.635	277.333	49.7873	137.333	34.5656	1064.67	356.437	1124	489.451	47.3333	5.78312	78.3333	18.7824	AT5G13930.1	Chalcone and stilbene synthase family protein	LOC_Os11g32650.1	chalcone synthase, putative, expressed
Sobic.003G118266	Suscepible vs Resistant	5 10 15	Lower in Susceptible	289	2	2	2	2	39.3333	2.96273	102	11.8462	2	2	5	2.64575	34	11.3725	99	6.65833	4	2.08167	0	0	96.6667	6.83943	174.333	11.5518	AT5G13930.1	Chalcone and stilbene synthase family protein	LOC_Os10g07616.1	chalcone synthase, putative, expressed
Sobic.007G148000	Suscepible vs Resistant	10	Lower in Susceptible	95	31	1.1547	32.6667	5.36449	41	7.37111	118.333	14.2634	8	1.52753	27.6667	9.33333	25.6667	8.98765	88.6667	10.3655	27.6667	10.0885	32	8.544	49.6667	2.4037	159.667	25.4384	AT3G14200.1	Chaperone DnaJ-domain superfamily protein	LOC_Os08g35160.1	heat shock protein DnaJ, putative, expressed
Sobic.002G055700	Suscepible vs Resistant	5 10	Higher in Susceptible	198	156	80.4073	972	258.258	33.6667	2.33333	53.6667	5.78312	206	28.931	1968	503.975	38.3333	9.38675	33.6667	3.4801	124.667	14.1696	2311.33	323.188	32.3333	11.3333	55	9.07377	AT5G24090.1	chitinase A	LOC_Os11g47580.1	glycosyl hydrolase, putative, expressed
Sobic.002G052000	Suscepible vs Resistant	5	Lower in Susceptible	131	50.3333	6.76593	161.333	124.526	163.667	54.1428	52.3333	9.02466	64	7.50555	36.6667	4.33333	160	77.2722	47.6667	4.91031	33.3333	4.17665	22	2.64575	34.6667	7.79601	33.3333	6.38575	AT3G22840.1	Chlorophyll A-B binding family protein	LOC_Os07g08160.1	early light-induced protein, chloroplast precursor, putative, expressed
Sobic.002G052100	Suscepible vs Resistant	5	Lower in Susceptible	131	9.66667	2.72845	43.6667	35.5074	47	17.8979	9	2.08167	3.66667	3.66667	6.33333	3.1798	23	12.3423	4.66667	4.66667	1.66667	1.66667	9	2.08167	21	5.1316	6.66667	3.75648	AT3G22840.1	Chlorophyll A-B binding family protein	LOC_Os07g08160.1	early light-induced protein, chloroplast precursor, putative, expressed
Sobic.007G168000	Suscepible vs Resistant	5	Lower in Susceptible	131	12	3.51188	24	14.1539	54.6667	22.0025	16.3333	4.63081	40.6667	13.3832	73	40.8412	50	21.9621	35.6667	4.17665	13.3333	2.33333	270.667	167.895	57.6667	18.3697	51.3333	7.88106	AT1G19670.1	chlorophyllase 1	LOC_Os10g28370.1	chlorophyllase-2, chloroplast precursor, putative, expressed
Sobic.004G132600	Suscepible vs Resistant	5 10	Higher in Susceptible	198	309.333	13.5933	320.667	19.4622	4.66667	2.60342	11.3333	8.51143	133.667	36.8299	234	83.5783	7.33333	3.84419	7.66667	4.09607	205	20.5508	164	9.86577	4.66667	2.4037	3.33333	1.66667	AT1G08490.1	chloroplastic NIFS-like cysteine desulfurase	LOC_Os12g18900.1	aminotransferase, putative, expressed
Sobic.007G055000	Suscepible vs Resistant	5 10 15	Higher in Susceptible	392	56.3333	0.333333	68.3333	6.06447	2	2	5.66667	3.1798	46.3333	12.4544	68	13	0	0	2	2	65.6667	5.81187	62	5.56776	0	0	0	0	AT2G47910.1	chlororespiratory reduction 6	LOC_Os08g07060.1	CRR6, putative, expressed
Sobic.010G248301	Suscepible vs Resistant	5 10	Higher in Susceptible	198	3934	1229.8	6778	1547.72	63.6667	19.5306	153	77.7367	1765.33	356.095	6165.67	1767.75	46	15.5885	102.667	12.8625	1460.33	154.506	3000	212.015	17.6667	1.45297	23	3.51188	AT4G29890.1	choline monooxygenase, putative (CMO-like)	LOC_Os06g48510.1	choline monooxygenase, chloroplast precursor, putative, expressed
Sobic.002G021200	Suscepible vs Resistant	10 15	Lower in Susceptible	170	145	74.505	43.6667	17.9753	104	39.6611	69	25.9808	35.6667	12.9142	16	2.51661	115	45.9384	148.667	45.0346	153.333	12.252	64.6667	34.7003	185.667	82.7453	121.333	17.3333	AT5G66750.1	chromatin remodeling 1	LOC_Os09g27060.1	SNF2 family N-terminal domain containing protein, expressed
Sobic.004G037000	Suscepible vs Resistant	5	Lower in Susceptible	131	19	3.78594	52	9.07377	63	8.0829	67.6667	15.6773	41	11.0151	60.6667	15.7621	63.3333	10.8679	52	11.9304	34.3333	7.35603	62.6667	9.27961	61.3333	16.5965	126.333	24.127	AT4G31180.2	Class II aminoacyl-tRNA and biotin synthetases superfamily protein	LOC_Os02g04700.1	tRNA synthetases class II domain containing protein, expressed
Sobic.001G485700	Suscepible vs Resistant	10	Lower in Susceptible	95	10	7.2111	6.33333	3.1798	40.6667	5.78312	33.3333	7.88106	4.33333	2.18581	10.6667	2.18581	45	2.51661	41.6667	4.09607	11.6667	0.881917	9.66667	2.72845	63.3333	4.66667	59	10.504	AT3G15000.1	cobalt ion binding	LOC_Os09g33480.1	DAG protein, chloroplast precursor, putative, expressed
Sobic.005G075200	Suscepible vs Resistant	5 10 15	Higher in Susceptible	392	44.3333	1.20185	49.6667	13.3458	2	2	0	0	46	2	49.6667	6.9602	0	0	0	0	52.6667	5.696	53.3333	6.69162	5	2.64575	1.66667	1.66667	AT5G10530.1	Concanavalin A-like lectin protein kinase family protein	LOC_Os12g26940.1	CHASE domain containing protein, expressed
Sobic.005G181200	Suscepible vs Resistant	5 10 15	Higher in Susceptible	392	50	4.04145	110.333	28.6026	8.66667	4.48454	12.3333	1.85592	99	14.1774	146.333	21.458	13.3333	0.881917	15.3333	4.66667	111.333	4.66667	195.667	4.33333	18	4.04145	21.6667	1.76383	AT5G10530.1	Concanavalin A-like lectin protein kinase family protein	LOC_Os09g16540.1	protein kinase, putative, expressed
Sobic.005G075400	Suscepible vs Resistant	10	Lower in Susceptible	95	17.6667	3.28295	16.6667	0.881917	31.3333	8.76229	28.6667	12.441	10.3333	0.333333	21	4	27.6667	7.31057	18	4.58258	17.6667	2.33333	19	4.72582	32.3333	9.02466	25.6667	2.02759	AT5G10530.1	Concanavalin A-like lectin protein kinase family protein	LOC_Os12g26940.1	CHASE domain containing protein, expressed
Sobic.002G269400	Suscepible vs Resistant	5 10 15	Lower in Susceptible	289	7693815	7693468	881	79.3494	2289.67	147.857	2336	183.764	334.333	113.67	693	175.745	1582.67	156.09	636.667	25.7186	230	103.737	284	61.5386	975.333	93.4172	443.667	44.8788	AT4G25470.1	C-repeat/DRE binding factor 2	LOC_Os09g35030.1	dehydration-responsive element-binding protein, putative, expressed
Sobic.009G125600	Suscepible vs Resistant	5	Higher in Susceptible	107	97	15.3079	117.667	12.1974	28	1.52753	39.6667	1.66667	108	19.5533	150	22.5019	39	6.08276	39.6667	2.848	96.3333	2.60342	115.333	13.8724	45	4.58258	49	3.05505	AT5G58003.1	C-terminal domain phosphatase-like 4	LOC_Os05g32430.1	NLI interacting factor-like phosphatase, putative, expressed
Sobic.010G004600	Suscepible vs Resistant	5 10	Higher in Susceptible	198	89.3333	14.6553	75.3333	14.6211	10.3333	5.78312	0	0	51.3333	15.3442	63.6667	11.348	5	2.64575	15.3333	2.02759	92	4.3589	53.3333	6.35959	7.66667	4.97773	6	3.78594	AT3G13200.1	Cwf15 / Cwc15 cell cycle control family protein	LOC_Os06g01700.1	CWC15 homolog A, putative, expressed
Sobic.001G442700	Suscepible vs Resistant	5 10 15	Higher in Susceptible	392	34.6667	2.848	32.3333	3.33333	12.3333	2.4037	14.3333	3.1798	32	2.51661	26	6.50641	11.3333	1.45297	15	2.08167	38	2.08167	36.3333	6.35959	18	3.21455	11	2.64575	AT2G01905.1	cyclin J18	LOC_Os03g13480.1	cyclin-J18-like, putative, expressed
Sobic.004G037300	Suscepible vs Resistant	5 10	Higher in Susceptible	198	30.6667	5.20683	22.6667	0.333333	2	2	0	0	24.6667	4.33333	11.3333	6.11919	0	0	1.66667	1.66667	29	2	22.3333	2.72845	3.66667	1.85592	3.33333	1.66667	AT2G07050.1	cycloartenol synthase 1	LOC_Os11g35710.1	cycloartenol synthase, putative, expressed
Sobic.007G043100	Suscepible vs Resistant	5 10 15	Higher in Susceptible	392	825	62.554	631.333	98.3977	41.6667	15.5599	37.3333	7.26483	934.333	25.6212	350.667	32.5849	76.3333	41.0257	49	10.0167	1974.33	106.509	300.667	93.1832	154.333	52.1099	123	19.6977	AT2G07050.1	cycloartenol synthase 1	LOC_Os11g18194.1	cycloartenol synthase, putative, expressed
Sobic.008G167100	Suscepible vs Resistant	5 10 15	Higher in Susceptible	392	173.667	15.7621	111.333	33.3783	0	0	6	3.4641	129.333	9.02466	27	7.2111	2	2	5.33333	2.90593	87.6667	4.91031	72.6667	47.5722	0	0	0	0	AT2G07050.1	cycloartenol synthase 1	LOC_Os11g18194.1	cycloartenol synthase, putative, expressed
Sobic.004G038300	Suscepible vs Resistant	5 10	Lower in Susceptible	161	147	28.2194	176.667	102.522	1346	251.197	803.667	232.612	79.3333	31.3812	26	8.5049	1342.67	667.531	814	192.486	124.667	15.3007	15.3333	6.35959	431	82.1361	382	39.8873	AT2G07050.1	cycloartenol synthase 1	LOC_Os11g35710.1	cycloartenol synthase, putative, expressed
Sobic.001G110701	Suscepible vs Resistant	5 10 15	Higher in Susceptible	392	79.6667	9.59745	53.6667	4.91031	0	0	2	2	58.3333	17.9475	61.6667	6.83943	0	0	5.33333	2.90593	46	2.51661	42.6667	6.00925	0	0	0	0	AT3G01480.2	cyclophilin 38	LOC_Os08g29370.1	peptidyl-prolyl cis-trans isomerase, chloroplast precursor, putative, expressed
Sobic.005G218000	Suscepible vs Resistant	10	Lower in Susceptible	95	404.333	218.817	96.6667	45.2008	241.333	115.121	214.667	87.4382	61	17.4356	30.3333	7.68838	637	458.661	677.667	253.982	483.667	91.0354	316.667	212.707	723.667	106.315	505.667	241.375	AT3G23530.1	Cyclopropane-fatty-acyl-phospholipid synthase	LOC_Os12g16650.1	Cyclopropane-fatty-acyl-phospholipid synthase, putative, expressed
Sobic.001G327300	Suscepible vs Resistant	5 10	Lower in Susceptible	161	24.6667	4.33333	19.6667	1.20185	76.6667	3.92994	99.3333	8.41295	17	6.80686	17.6667	3.92994	54.3333	6.35959	94	15.5349	37.6667	2.33333	33	5.2915	71.6667	3.38296	92.6667	8.17177	AT3G23510.1	Cyclopropane-fatty-acyl-phospholipid synthase	LOC_Os12g16650.1	Cyclopropane-fatty-acyl-phospholipid synthase, putative, expressed
Sobic.003G354700	Suscepible vs Resistant	10	Higher in Susceptible	115	8.33333	1.20185	12.3333	1.85592	0	0	0	0	12.6667	3.1798	20	4.3589	0	0	0	0	10.3333	1.20185	18.6667	4.40959	0	0	0	0	AT5G60190.1	Cysteine proteinases superfamily protein	LOC_Os12g01290.1	ulp1 protease family protein, putative, expressed
Sobic.006G007100	Suscepible vs Resistant	5 10 15	Higher in Susceptible	392	208	35.171	642.667	259.869	39	10.2144	22	3.60555	599	162.263	4223.33	1790.91	72	19.975	125.333	68.4527	821.333	94.4287	11739.3	4836.3	188.667	155.18	394.667	227.967	AT3G49340.1	Cysteine proteinases superfamily protein	LOC_Os09g21370.1	cysteine proteinase EP-B 1 precursor, putative, expressed
Sobic.008G161500	Suscepible vs Resistant	5 10 15	Higher in Susceptible	392	36.6667	0.333333	33.6667	5.60753	0	0	2	2	35.3333	10.1708	71	10.0167	11.6667	1.76383	11.6667	1.66667	32.3333	4.84195	79	33.7095	14.6667	1.45297	13.6667	1.33333	AT1G10570.1	Cysteine proteinases superfamily protein	LOC_Os12g41380.1	ulp1 protease family protein, putative, expressed
Sobic.008G099600	Suscepible vs Resistant	5 10 15	Higher in Susceptible	392	470.333	91.6157	1263.67	430.435	16	4.58258	17.6667	13.4205	2270.67	343.539	2696	551.112	33.6667	11.0202	44.3333	20.0028	1479.67	125.975	1957.33	237.587	5	2.88675	6	1	AT4G23180.1	cysteine-rich RLK (RECEPTOR-like protein kinase) 10	LOC_Os11g39450.1	cysteine-rich receptor-like protein kinase 7 precursor, putative, expressed
Sobic.002G329000	Suscepible vs Resistant	5	Lower in Susceptible	131	44.3333	4.91031	113.333	22.8206	150.667	17.5721	182.333	23.9467	63.6667	22.1836	151.667	29.0593	149.667	26.9959	185.333	27.3882	53.3333	2.4037	148.667	11.0504	115.333	23.5961	167.333	27.3394	AT4G23180.1	cysteine-rich RLK (RECEPTOR-like protein kinase) 10	LOC_Os07g35790.1	TKL_IRAK_DUF26-ld.5 - DUF26 kinases have homology to DUF26 containing loci, expressed
Sobic.003G314200	Suscepible vs Resistant	5	Lower in Susceptible	131	26.6667	3.75648	38.6667	5.89727	76.3333	3.52767	106.667	10.4137	31.6667	2.66667	59.6667	15.6027	45.3333	8.87568	112.667	20.6263	37	2	68	2.88675	77	2.08167	178.667	27.9662	AT4G23200.1	cysteine-rich RLK (RECEPTOR-like protein kinase) 12	LOC_Os04g12080.1	TKL_IRAK_DUF26-lc.7 - DUF26 kinases have homology to DUF26 containing loci, expressed
Sobic.005G210200	Suscepible vs Resistant	5 10	Higher in Susceptible	198	284	50.9215	282	37.8197	19.3333	7.88106	19.6667	9.52774	186.333	63.9436	441.333	104.614	8	4.04145	13.6667	6.69162	651.667	54.8614	529.667	64.3333	5.33333	2.66667	4.33333	2.33333	AT4G23230.1	cysteine-rich RLK (RECEPTOR-like protein kinase) 15	LOC_Os06g47530.1	TKL_IRAK_DUF26-lh.6 - DUF26 kinases have homology to DUF26 containing loci, expressed
Sobic.001G277500	Suscepible vs Resistant	5 10 15	Lower in Susceptible	289	2	2	0	0	23.6667	2.33333	41	8.32666	3.33333	3.33333	0	0	19.3333	3.84419	49	6.50641	5	2.88675	7.66667	1.45297	52	16.3707	72.3333	18.8886	AT4G23310.1	cysteine-rich RLK (RECEPTOR-like protein kinase) 23	LOC_Os10g04730.1	TKL_IRAK_DUF26-la.6 - DUF26 kinases have homology to DUF26 containing loci, expressed
Sobic.005G209400	Suscepible vs Resistant	5 10 15	Lower in Susceptible	289	133	8.5049	165.667	12.6007	731.667	106.39	590.667	29.492	117	23.8118	193	27.3008	514.667	38.3942	521.667	29.2423	118.333	7.2188	144.667	29.5541	558	53.7773	614	68.5493	AT4G05200.1	cysteine-rich RLK (RECEPTOR-like protein kinase) 25	LOC_Os06g47530.1	TKL_IRAK_DUF26-lh.6 - DUF26 kinases have homology to DUF26 containing loci, expressed
Sobic.005G207000	Suscepible vs Resistant	5 10 15	Lower in Susceptible	289	17.3333	6.43774	12.6667	5.696	359.333	56.9512	437.667	44.3672	7	4.04145	11.3333	7.31057	400.667	56.0278	506.333	48.7932	7.66667	1.45297	4.33333	2.33333	283.667	20.6101	478.333	50.3863	AT4G04540.1	cysteine-rich RLK (RECEPTOR-like protein kinase) 39	LOC_Os12g14699.1	protein kinase domain containing protein, expressed
Sobic.008G099300	Suscepible vs Resistant	5 10 15	Higher in Susceptible	392	72.3333	9.76957	127	7.50555	0	0	6	6	131.333	24.3059	169.667	39.3715	4	2	6	3.4641	109	8.66025	144.667	19.4279	0	0	0	0	AT4G00970.1	cysteine-rich RLK (RECEPTOR-like protein kinase) 41	LOC_Os11g39450.1	cysteine-rich receptor-like protein kinase 7 precursor, putative, expressed
Sobic.004G035400	Suscepible vs Resistant	5 10 15	Higher in Susceptible	392	224.667	13.3832	265.667	43.2371	34.3333	12.9915	80.3333	17.3429	193.333	18.8886	305	41.8609	33.6667	11.348	40.3333	1.85592	268.667	6.22718	401	41.7892	66.3333	18.2696	52.6667	21.0502	AT4G23150.1	cysteine-rich RLK (RECEPTOR-like protein kinase) 7	LOC_Os09g13610.1	PFT1, putative, expressed
Sobic.002G328800	Suscepible vs Resistant	10 15	Higher in Susceptible	200	550.333	107.73	596.667	68.46	212.667	21.881	211	33.5609	738.333	86.5454	784	119.453	193.667	32.9916	229.667	30.5632	477.333	13.9084	388.667	69.1408	83	14.2244	141	31.5013	AT4G23160.1	cysteine-rich RLK (RECEPTOR-like protein kinase) 8	LOC_Os07g35330.1	TKL_IRAK_DUF26-lc.13 - DUF26 kinases have homology to DUF26 containing loci, expressed
Sobic.003G275300	Suscepible vs Resistant	5 10 15	Higher in Susceptible	392	145.333	23.6807	114.333	8.56997	47.3333	4.37163	30	5	144.667	9.76957	181.667	35.5918	44.3333	4.25572	39.6667	0.333333	94.6667	7.12585	134	42.1426	23	1.52753	26	3.78594	AT2G19570.1	cytidine deaminase 1	LOC_Os01g51540.1	cytidine/deoxycytidylate deaminase, putative, expressed
Sobic.002G379000	Suscepible vs Resistant	5 10	Lower in Susceptible	161	0	0	2.66667	2.66667	26	3.05505	22.6667	0.881917	0	0	4.33333	4.33333	26.3333	5.20683	20	1.1547	1.66667	1.66667	0	0	25	2.08167	22	2.08167	AT1G22450.1	cytochrome C oxidase 6B	LOC_Os07g42910.1	cytochrome c oxidase subunit, putative, expressed
Sobic.004G342100	Suscepible vs Resistant	10 15	Lower in Susceptible	170	64.3333	7.51295	37	7.2111	173	33.2315	160.333	29.9852	36.3333	3.4801	20.6667	5.60753	127	23.1805	140.333	23.3119	57.6667	2.90593	25.3333	7.5351	170	37.6076	198.667	22.1911	AT3G27240.1	Cytochrome C1 family	LOC_Os02g56940.2	expressed protein
Sobic.003G231300	Suscepible vs Resistant	5	Higher in Susceptible	107	36	5.68624	15.3333	3.1798	8.33333	1.76383	4	2	21.3333	6.00925	17.3333	3.92994	4.66667	4.66667	0	0	31	6.65833	29.3333	17.9475	10.3333	1.85592	6.66667	0.881917	AT1G11680.1	CYTOCHROME P450 51G1	LOC_Os02g21810.1	cytochrome P450 51, putative, expressed
Sobic.005G162300	Suscepible vs Resistant	5 10 15	Lower in Susceptible	289	6.33333	3.1798	4	2	68.3333	12.9915	38	12.0139	2.33333	2.33333	2.33333	2.33333	27	4.50925	24	3.05505	9.33333	1.33333	0	0	24.3333	8.35331	24	6.35085	AT1G11680.1	CYTOCHROME P450 51G1	LOC_Os05g34325.1	cytochrome P450 51, putative, expressed
Sobic.002G216500	Suscepible vs Resistant	10	Higher in Susceptible	115	111.667	30.9049	372	99.5707	140.667	17.7983	83.6667	17.3718	341	47.0319	1071	132.035	95.3333	18.7646	129.667	77.2924	134.333	13.1698	1197.67	116.356	60.3333	14.1931	214	72.1133	AT5G07990.1	Cytochrome P450 superfamily protein	LOC_Os09g26960.1	cytochrome P450, putative, expressed
Sobic.004G086400	Suscepible vs Resistant	10	Higher in Susceptible	115	28.6667	8.37324	35.6667	10.2035	25	7.50555	14	1	47.3333	7.75314	56	9.07377	16.6667	3.4801	12.6667	4.05518	62	15.5027	131.333	84.44	20.3333	5.54777	46	9.0185	AT2G26710.1	Cytochrome P450 superfamily protein	LOC_Os02g11020.1	cytochrome P450 72A1, putative, expressed
Sobic.010G197700	Suscepible vs Resistant	5 10	Higher in Susceptible	198	183	33.3067	126.333	47.0331	9.66667	2.33333	10.3333	2.18581	120.333	23.6807	34.6667	7.12585	4	2	9.66667	5.23874	192.333	11.921	18.3333	6.69162	2.33333	2.33333	1.66667	1.66667	AT2G12190.1	Cytochrome P450 superfamily protein	LOC_Os07g26870.1	cytochrome P450, putative, expressed
Sobic.002G040400	Suscepible vs Resistant	5	Lower in Susceptible	131	5.66667	3.1798	12.3333	4.48454	31.3333	8.11035	13	0.57735	23	3.60555	35.3333	12.0324	20.3333	3.66667	13.3333	1.20185	22	3.51188	22.3333	6.11919	20.6667	5.04425	21.3333	5.4569	AT5G07990.1	Cytochrome P450 superfamily protein	LOC_Os03g44740.1	cytochrome P450, putative, expressed
Sobic.002G216400	Suscepible vs Resistant	5	Lower in Susceptible	131	106.667	32.2972	213.667	46.763	502	104.5	250	85.1019	372	26.8514	626.333	89.3016	486	71.2905	276.333	33.4182	199.667	34.1679	528	81.6272	334.667	57.0536	379.667	58.359	AT5G07990.1	Cytochrome P450 superfamily protein	LOC_Os09g26960.1	cytochrome P450, putative, expressed
Sobic.010G019500	Suscepible vs Resistant	10 15	Higher in Susceptible	200	47.6667	11.2596	72	10.3923	21	3.05505	28.6667	7.12585	62.3333	9.20748	84	8.96289	20.3333	5.20683	23	3.78594	58.3333	4.05518	121.667	13.7154	20.3333	1.45297	27.6667	7.5351	AT2G45510.1	cytochrome P450, family 704, subfamily A, polypeptide 2	LOC_Os06g03930.1	cytochrome P450 86A1, putative, expressed
Sobic.002G389000	Suscepible vs Resistant	5	Lower in Susceptible	131	11.3333	2.72845	32.6667	23.1828	38.6667	8.51143	12	1.73205	16.3333	0.333333	16	5.50757	20.6667	4.97773	5.33333	2.90593	10.3333	1.85592	25	11	14.3333	5.84047	3.33333	1.66667	AT2G46950.1	cytochrome P450, family 709, subfamily B, polypeptide 2	LOC_Os07g23570.1	cytochrome P450 72A1, putative, expressed
Sobic.002G388900	Suscepible vs Resistant	5 10	Lower in Susceptible	161	12	1.52753	64	48.0035	71	28.0238	14.6667	4.8074	6.33333	3.75648	42.3333	23.9745	36.3333	15.899	5	2.64575	18	2.51661	26	7.0946	22.3333	6.9602	14	3.60555	AT2G46950.1	cytochrome P450, family 709, subfamily B, polypeptide 2	LOC_Os07g23570.1	cytochrome P450 72A1, putative, expressed
Sobic.001G176400	Suscepible vs Resistant	5 10	Higher in Susceptible	198	66.6667	16.0139	55	13.6504	5.66667	2.848	9	1.52753	60	8.73689	51.6667	12.9142	5.66667	5.66667	0	0	66	6.35085	73	12.7671	9.66667	1.45297	9	3.05505	AT1G13110.1	cytochrome P450, family 71 subfamily B, polypeptide 7	LOC_Os03g39650.1	cytochrome P450, putative, expressed
Sobic.001G176600	Suscepible vs Resistant	10 15	Higher in Susceptible	200	715	178.371	697.333	166.199	198.333	39.9388	145.667	34.4787	560	94.8543	626	206.428	131.333	39.918	94.6667	26.5225	754	98.5038	927.667	75.0585	238.333	11.348	121	12.2202	AT1G13110.1	cytochrome P450, family 71 subfamily B, polypeptide 7	LOC_Os03g39650.1	cytochrome P450, putative, expressed
Sobic.001G338900	Suscepible vs Resistant	10	Lower in Susceptible	95	23.3333	9.13479	31.6667	7.31057	30	6.1101	30.3333	1.85592	12.6667	1.76383	41.3333	26.8721	41.6667	2.96273	25.6667	7.4461	15	2.64575	18.3333	10.4775	35.6667	4.37163	43	5.7735	AT1G13110.1	cytochrome P450, family 71 subfamily B, polypeptide 7	LOC_Os04g10160.1	cytochrome P450, putative, expressed
Sobic.002G065800	Suscepible vs Resistant	5	Lower in Susceptible	131	21	2	54.3333	26.4092	63	25.482	49	22.8692	54.3333	3.28295	82	22.5019	50.6667	17.9382	22.6667	3.4801	118.333	36.1032	89.6667	53.0859	33.6667	10.8372	115.667	30.683	AT1G13110.1	cytochrome P450, family 71 subfamily B, polypeptide 7	LOC_Os10g30380.1	cytochrome P450, putative, expressed
Sobic.007G071800	Suscepible vs Resistant	10 15	Lower in Susceptible	170	7.66667	0.881917	8.66667	5.92546	7	4.3589	19.6667	4.17665	4.33333	4.33333	12	1.73205	22.6667	3.38296	14	3.4641	5	2.51661	14.3333	2.60342	20.3333	0.333333	16.6667	4.25572	AT3G48310.1	cytochrome P450, family 71, subfamily A, polypeptide 22	LOC_Os06g22020.1	cytochrome P450, putative, expressed
Sobic.009G196700	Suscepible vs Resistant	5	Higher in Susceptible	107	22.6667	4.48454	19.3333	5.17472	3.66667	1.85592	9	3	17.3333	5.36449	15.3333	8.95048	2	2	3	3	18.6667	1.33333	16.6667	12.8755	1.66667	1.66667	0	0	AT3G48280.1	cytochrome P450, family 71, subfamily A, polypeptide 25	LOC_Os05g43910.1	cytochrome P450, putative, expressed
Sobic.003G009900	Suscepible vs Resistant	5 10	Lower in Susceptible	161	4.66667	2.4037	4	2	52	15.0997	128.333	12.7061	4	4	4.33333	2.18581	42.6667	11.2891	98.6667	35.3192	4.33333	2.33333	0	0	134.667	21.957	210	29.2973	AT3G48280.1	cytochrome P450, family 71, subfamily A, polypeptide 25	LOC_Os01g12740.1	cytochrome P450, putative, expressed
Sobic.001G229500	Suscepible vs Resistant	5 10 15	Higher in Susceptible	392	60.6667	6.43774	42	1.52753	3	3	7.66667	4.33333	79.6667	18.2239	11	6.65833	5	2.64575	3.33333	3.33333	18.6667	1.45297	11.6667	5.84047	0	0	1.66667	1.66667	AT1G13080.1	cytochrome P450, family 71, subfamily B, polypeptide 2	LOC_Os03g39650.1	cytochrome P450, putative, expressed
Sobic.005G158000	Suscepible vs Resistant	5 10	Higher in Susceptible	198	40	8.73689	33	1.52753	3.66667	3.66667	2.66667	2.66667	76	20.2567	39.6667	8.64741	0	0	2	2	40.3333	5.20683	17.6667	9.06152	0	0	0	0	AT3G26300.1	cytochrome P450, family 71, subfamily B, polypeptide 34	LOC_Os03g63310.1	cytochrome P450 71E1, putative, expressed
Sobic.002G065700	Suscepible vs Resistant	10 15	Higher in Susceptible	200	26.3333	2.4037	75	18.5023	14.3333	5.33333	16	4.04145	74	15.5027	123	17.5214	12.3333	4.09607	10.3333	0.881917	70.3333	20.5778	181.333	102.389	15.3333	3.1798	41.6667	7.5351	AT3G26300.1	cytochrome P450, family 71, subfamily B, polypeptide 34	LOC_Os10g30380.1	cytochrome P450, putative, expressed
Sobic.003G269500	Suscepible vs Resistant	5 10 15	Higher in Susceptible	392	17.6667	2.4037	11.3333	0.881917	0	0	5	2.64575	20	2.64575	12	1.52753	5	2.64575	2	2	21	1	9.33333	5.81187	6.66667	1.20185	5	0	AT2G26170.1	cytochrome P450, family 711, subfamily A, polypeptide 1	LOC_Os01g50590.1	cytochrome P450, putative, expressed
Sobic.005G015600	Suscepible vs Resistant	5 10	Higher in Susceptible	198	108	21.3854	122.667	4.70225	22	0.57735	14	2.51661	127.333	4.63081	169.333	35.983	18.6667	1.85592	22.3333	2.90593	112.333	15.6241	140	6.80686	18.6667	0.666667	20	1.52753	AT5G24910.1	cytochrome P450, family 714, subfamily A, polypeptide 1	LOC_Os12g02640.1	cytochrome P450 72A1, putative, expressed
Sobic.005G192500	Suscepible vs Resistant	5 10 15	Lower in Susceptible	289	50	4.93288	50.6667	7.5351	433.667	95.9728	374	87.0689	65.6667	6.43774	76	11.1505	518.667	70.5912	410	20.4042	54	3.51188	41.3333	5.23874	399	14.7986	264.667	17.1302	AT5G36110.1	cytochrome P450, family 716, subfamily A, polypeptide 1	LOC_Os07g33580.1	cytochrome P450, putative, expressed
Sobic.009G133100	Suscepible vs Resistant	5	Higher in Susceptible	107	59.6667	0.881917	65.3333	7.88106	21	3.78594	21.3333	3.1798	39.6667	6.35959	52	6	19.3333	5.36449	31.3333	0.881917	81	6.50641	77.6667	1.76383	45.3333	4.33333	38.6667	4.09607	AT1G75130.1	cytochrome P450, family 721, subfamily A, polypeptide 1	LOC_Os05g33600.1	cytochrome P450 72A1, putative, expressed
Sobic.009G000700	Suscepible vs Resistant	5 10	Higher in Susceptible	198	47	15.1438	34.6667	6.69162	17.3333	1.45297	22.6667	2.66667	48	6.65833	21.3333	4.09607	18.3333	3.71184	19.6667	2.02759	70.3333	5.89727	40	8.02081	9.66667	2.90593	11.3333	2.02759	AT1G19630.1	cytochrome P450, family 722, subfamily A, polypeptide 1	LOC_Os05g01120.1	cytochrome P450, putative, expressed
Sobic.005G206601	Suscepible vs Resistant	5	Lower in Susceptible	131	12	1.52753	9	5.50757	50.3333	6.22718	18.3333	6.69162	16.3333	5.36449	2	2	21	3.51188	19.3333	2.33333	10	2	0	0	17.6667	2.33333	16.3333	3.1798	AT2G45570.1	cytochrome P450, family 76, subfamily C, polypeptide 2	LOC_Os09g27500.1	cytochrome P450, putative, expressed
Sobic.005G115800	Suscepible vs Resistant	5 10 15	Lower in Susceptible	289	7.66667	0.881917	4.66667	2.4037	39	11.2694	29.3333	13.3708	4.33333	2.18581	2.66667	2.66667	49.6667	7.35603	56	14.1067	11.6667	0.666667	4.33333	2.33333	10.6667	3.1798	9.66667	5.48736	AT1G74110.1	cytochrome P450, family 78, subfamily A, polypeptide 10	LOC_Os11g29720.1	cytochrome P450, putative, expressed
Sobic.008G144300	Suscepible vs Resistant	5 10	Higher in Susceptible	198	95.3333	4.70225	69.3333	15.857	26	0.57735	24.3333	1.33333	118.333	12.9915	23.3333	8.83805	28.6667	1.45297	25.3333	6.74125	95.3333	4.37163	31.3333	4.66667	29.3333	6.11919	21	2	AT4G37340.1	cytochrome P450, family 81, subfamily D, polypeptide 3	LOC_Os12g39300.1	cytochrome P450, putative, expressed
Sobic.003G360900	Suscepible vs Resistant	10	Higher in Susceptible	115	139.333	6.00925	260	26.6896	56	9.71253	50.6667	3.75648	183.333	3.4801	452.667	57.7764	49	13.4536	43.3333	3.84419	164.333	25.8736	501.667	203.213	54.3333	8.35331	49	2.88675	AT4G37330.1	cytochrome P450, family 81, subfamily D, polypeptide 4	LOC_Os03g55240.1	cytochrome P450, putative, expressed
Sobic.003G360600	Suscepible vs Resistant	10	Higher in Susceptible	115	34	5.03322	25.6667	7.5351	24.6667	1.66667	21.6667	3.71184	44.3333	9.59745	0	0	15.6667	1.85592	15.6667	3.92994	26	6.02771	17.6667	9.59745	15.6667	0.881917	11.6667	1.45297	AT5G58860.1	cytochrome P450, family 86, subfamily A, polypeptide 1	LOC_Os01g63540.1	cytochrome P450, putative, expressed
Sobic.004G283900	Suscepible vs Resistant	10 15	Lower in Susceptible	170	6.33333	3.75648	2	2	17.3333	8.33333	23.6667	3.66667	0	0	2	2	16.3333	2.02759	22	4.3589	0	0	0	0	9.66667	2.02759	10	3	AT1G12740.1	cytochrome P450, family 87, subfamily A, polypeptide 2	LOC_Os02g45280.1	cytochrome P450, putative, expressed
Sobic.001G195300	Suscepible vs Resistant	10	Higher in Susceptible	115	254.333	42.6393	310.333	51.4922	110.333	38.7399	70.3333	7.17248	354.667	73.6938	292	62.9153	76	13.0512	90.3333	20.9152	386.333	20.8833	619.333	65.9832	74.6667	8.11035	218.333	24.2647	AT1G64940.1	cytochrome P450, family 87, subfamily A, polypeptide 6	LOC_Os10g36980.1	transposon protein, putative, unclassified, expressed
Sobic.001G195100	Suscepible vs Resistant	5	Lower in Susceptible	131	98.6667	22.5265	541.667	237.727	402.333	123.641	305	47.2476	152.333	24.504	893.333	492.335	153.333	10.8679	175.333	60.0342	353.333	18.7824	1904	569.105	658.333	168.446	752.333	228.845	AT1G64940.1	cytochrome P450, family 87, subfamily A, polypeptide 6	LOC_Os10g37110.1	transposon protein, putative, unclassified, expressed
Sobic.001G195200	Suscepible vs Resistant	5	Lower in Susceptible	131	0	0	4	2	27	19.0788	6	0	0	0	16	16	0	0	0	0	0	0	0	0	2	2	0	0	AT1G64940.1	cytochrome P450, family 87, subfamily A, polypeptide 6	LOC_Os10g37110.1	transposon protein, putative, unclassified, expressed
Sobic.001G195500	Suscepible vs Resistant	5	Lower in Susceptible	131	29.6667	8.29324	30	10.0167	103	21.2211	88	1	24.3333	14.7686	23.3333	7.4461	78.3333	13.9801	77.3333	13.8363	34.3333	5.36449	21.6667	2.18581	75	13.2288	141.333	23.2116	AT1G64940.1	cytochrome P450, family 87, subfamily A, polypeptide 6	LOC_Os10g36980.1	transposon protein, putative, unclassified, expressed
Sobic.003G058600	Suscepible vs Resistant	5 10	Lower in Susceptible	161	2	2	0	0	61.3333	7.2188	29.6667	7.5351	5.66667	2.96273	4	2	42.6667	6.35959	29	1	1.66667	1.66667	0	0	8.66667	4.33333	5	5	AT1G64940.1	cytochrome P450, family 87, subfamily A, polypeptide 6	LOC_Os02g01890.1	cytochrome P450, putative, expressed
Sobic.008G014200	Suscepible vs Resistant	5 10	Lower in Susceptible	161	2.66667	2.66667	9.33333	4.66667	59	18.8237	45	7.76745	8.66667	4.37163	6.33333	3.75648	50.6667	2.33333	54	9	21.6667	6.00925	4.33333	2.33333	99.3333	7.5351	136.333	7.9652	AT3G03470.1	cytochrome P450, family 87, subfamily A, polypeptide 9	LOC_Os07g26870.1	cytochrome P450, putative, expressed
Sobic.009G074300	Suscepible vs Resistant	10 15	Higher in Susceptible	200	345	31.0859	438.667	4.05518	108	23.0651	180.333	61.298	410	25.7747	458.333	26.9093	105.333	11.9768	226	39.6274	279	9.29157	209	26.7644	160.333	18.2239	311	41.2957	AT3G13730.1	cytochrome P450, family 90, subfamily D, polypeptide 1	LOC_Os05g11130.1	cytochrome P450, putative, expressed
Sobic.005G037000	Suscepible vs Resistant	5	Lower in Susceptible	131	5.33333	2.90593	48.3333	21.4269	43.6667	7.88106	61	20	13	1.73205	69	47.2476	14	5.2915	11	2.51661	9	9	26.3333	4.48454	38.3333	10.9899	21.3333	1.33333	AT2G27690.1	cytochrome P450, family 94, subfamily C, polypeptide 1	LOC_Os11g05380.1	cytochrome P450, putative, expressed
Sobic.008G036000	Suscepible vs Resistant	5	Lower in Susceptible	131	2	2	34.6667	10.5251	56.3333	1.76383	71	20.0333	9	4.50925	136.667	102.85	23.3333	1.76383	17	5.50757	7	4.72582	18.3333	6.00925	54.3333	20.0859	20.6667	3.4801	AT2G27690.1	cytochrome P450, family 94, subfamily C, polypeptide 1	LOC_Os11g05380.1	cytochrome P450, putative, expressed
Sobic.003G036700	Suscepible vs Resistant	10 15	Higher in Susceptible	200	26	3.51188	43	8.96289	29.6667	5.696	18.3333	0.881917	74.3333	25.1484	61	11.1355	22.3333	4.48454	31	11.5326	45.6667	13.5442	43	18.8768	18.3333	6.64162	22	2.88675	AT4G29740.2	cytokinin oxidase 4	LOC_Os01g09260.1	cytokinin dehydrogenase precursor, putative, expressed
Sobic.009G118700	Suscepible vs Resistant	10 15	Lower in Susceptible	170	34.6667	4.91031	49.6667	11.7237	63	17.0392	27	4.3589	30	3.51188	43.3333	6.11919	91.3333	13.8604	49.6667	10.7134	83.6667	8.17177	43	4.93288	86.3333	11.4066	53.6667	0.881917	AT2G41510.1	cytokinin oxidase/dehydrogenase 1	LOC_Os05g31040.1	cytokinin dehydrogenase precursor, putative, expressed
Sobic.006G126800	Suscepible vs Resistant	10	Lower in Susceptible	95	28.6667	8.68588	16	6.02771	25.6667	11.6094	25	8.3865	12	3.60555	9.33333	1.45297	32.3333	9.76957	34.6667	8.83805	43	3.78594	19	2.64575	37	12.49	40.6667	11.0504	AT1G27880.1	DEAD/DEAH box RNA helicase family protein	LOC_Os04g40970.1	DEAD-box ATP-dependent RNA helicase, putative, expressed
Sobic.010G146100	Suscepible vs Resistant	5 10 15	Lower in Susceptible	289	100.667	35.3569	99	36.0555	3704.67	1622.31	6306.33	754.543	53.3333	24.5787	104.333	13.3208	2098.33	302.028	3807	846.856	34.6667	7.31057	47.6667	9.27961	2982	712.278	3653.33	572.924	AT3G16240.1	delta tonoplast integral protein	LOC_Os06g22960.1	aquaporin protein, putative, expressed
Sobic.010G144000	Suscepible vs Resistant	5 10	Higher in Susceptible	198	38.3333	2.33333	39.6667	1.45297	0	0	0	0	51	5.1316	54.3333	10.105	2	2	0	0	42.3333	2.90593	43	2.88675	0	0	1.66667	1.66667	AT1G48760.2	delta-adaptin	LOC_Os01g32880.1	AP-3 complex subunit delta, putative, expressed
Sobic.007G020000	Suscepible vs Resistant	5 10 15	Higher in Susceptible	392	28.3333	5.696	31.6667	1.20185	0	0	0	0	33.6667	4.17665	41.3333	0.881917	0	0	0	0	32.3333	2.18581	31.6667	4.09607	0	0	0	0	AT1G48760.1	delta-adaptin	LOC_Os01g32880.1	AP-3 complex subunit delta, putative, expressed
Sobic.010G184900	Suscepible vs Resistant	5 10 15	Higher in Susceptible	392	19	5.68624	20.6667	4.66667	0	0	0	0	20.6667	3.75648	25	3.78594	0	0	0	0	22.3333	3.33333	21	2	1.66667	1.66667	3.33333	1.66667	AT1G48760.3	delta-adaptin	LOC_Os01g32880.1	AP-3 complex subunit delta, putative, expressed
Sobic.002G064700	Suscepible vs Resistant	5 10	Lower in Susceptible	161	10.3333	5.17472	18.3333	7.83865	62.6667	6.22718	46.3333	11.348	7	4.04145	20.6667	3.4801	67.3333	7.62306	36.6667	3.1798	15.6667	2.60342	24	0.57735	40.6667	3.52767	37	7	AT4G15560.1	Deoxyxylulose-5-phosphate synthase	LOC_Os07g09190.1	transketolase, putative, expressed
Sobic.001G201900	Suscepible vs Resistant	10	Lower in Susceptible	95	80.3333	4.25572	59	2.88675	237.667	29.6329	233	9.81495	43	7.2111	53	9.29157	187	4.04145	221	26.5769	88.6667	6.33333	74.3333	11.0202	216	26.3122	228.667	14.6211	AT5G05980.1	DHFS-FPGS homolog B	LOC_Os10g35940.1	folylpolyglutamate synthetase, putative, expressed
Sobic.008G049000	Suscepible vs Resistant	5 10	Lower in Susceptible	161	0	0	0	0	30	5.56776	23.3333	4.63081	0	0	5.33333	2.90593	21.6667	6.35959	17.3333	10.7445	1.66667	1.66667	2	2	26	5	18	2.88675	AT3G51520.1	diacylglycerol acyltransferase family	LOC_Os02g48350.1	diacylglycerol O-acyltransferase, putative, expressed
Sobic.007G226700	Suscepible vs Resistant	5 10 15	Lower in Susceptible	289	27	2.88675	42.3333	5.4569	144.667	8.25295	177	13.6504	22	5	46.3333	5.78312	145.333	20.3333	199.333	12.7061	25.6667	2.60342	48	9.16515	176.667	16.6966	220.333	21.9874	AT5G64290.1	dicarboxylate transport 2.1	LOC_Os08g37600.1	citrate transporter, putative, expressed
Sobic.001G214000	Suscepible vs Resistant	10	Lower in Susceptible	95	20.3333	5.84047	20	2.51661	32.3333	2.18581	32.6667	5.696	12.3333	6.17342	24	5.50757	36.6667	8.83805	42.6667	9.24362	16.3333	1.76383	13.6667	4.48454	38.3333	6.11919	40	5.50757	AT3G43920.2	dicer-like 3	LOC_Os10g34430.1	Dicer, putative, expressed
Sobic.003G100500	Suscepible vs Resistant	5 10	Lower in Susceptible	161	0	0	2	2	30.3333	7.75314	35.6667	8.83805	2.33333	2.33333	7.33333	0.881917	32	6.02771	43.6667	2.96273	4	4	1.66667	1.66667	29.3333	5.48736	56	5.7735	AT2G34930.1	disease resistance family protein / LRR family protein	LOC_Os11g35490.1	leucine rich repeat protein, putative, expressed
Sobic.003G193000	Suscepible vs Resistant	5 10	Higher in Susceptible	198	422	46.0145	307.667	17.0522	109	15.6312	117.667	19.8354	703.333	40.523	547.333	72.8385	183.667	40.769	140.667	9.90511	318	59.7523	342.333	40.2175	151	17.1561	194.667	6.43774	AT2G34930.1	disease resistance family protein / LRR family protein	LOC_Os02g17400.1	leucine rich repeat protein, putative, expressed
Sobic.003G210801	Suscepible vs Resistant	5 10 15	Higher in Susceptible	392	101.333	10.2686	91	10.1489	7.33333	3.84419	8.33333	4.25572	180.333	23.0241	140.333	16.4553	6	0	5	5	133.333	30.2453	68.3333	8.45248	7.66667	1.45297	5	2.88675	AT2G34930.1	disease resistance family protein / LRR family protein	LOC_Os01g41770.1	leucine rich repeat protein, putative, expressed
Sobic.003G435900	Suscepible vs Resistant	5 10 15	Lower in Susceptible	289	21.6667	3.28295	20	0.57735	226.333	37.8168	235.667	12.1701	33.6667	9.83757	14.6667	2.60342	284.333	15.5063	194	29.023	36.3333	8.25295	7.33333	3.71184	127.333	10.3655	115.667	8.37324	AT5G43740.2	Disease resistance protein (CC-NBS-LRR class) family	LOC_Os01g72680.1	disease resistance protein RPS2, putative, expressed
Sobic.005G060900	Suscepible vs Resistant	5 10 15	Higher in Susceptible	392	16	3.78594	33.6667	6.35959	0	0	2	2	29	3.21455	45.6667	7.83865	2	2	5	2.64575	24.3333	1.66667	52	11.5902	2.66667	2.66667	1.66667	1.66667	AT2G34930.1	disease resistance family protein / LRR family protein	LOC_Os01g41770.1	leucine rich repeat protein, putative, expressed
Sobic.005G127800	Suscepible vs Resistant	10 15	Higher in Susceptible	200	153.667	32.8853	472.333	146.174	74	20.6478	48.6667	8.83805	499	103.558	843.667	163.306	69.6667	9.56266	87	21.0317	337.667	41.8343	809.667	49.7639	58.3333	9.33333	127.333	30.3223	AT2G34930.1	disease resistance family protein / LRR family protein	LOC_Os11g35840.1	expressed protein
Sobic.005G154300	Suscepible vs Resistant	5 10 15	Higher in Susceptible	392	184	28.8444	172.667	16.4958	0	0	4	4	186	47.184	253	44.5234	5.66667	5.66667	5.33333	2.90593	225.667	22.8206	241	30.2379	3.33333	1.66667	1.66667	1.66667	AT1G58410.1	Disease resistance protein (CC-NBS-LRR class) family	LOC_Os11g34920.1	stripe rust resistance protein Yr10, putative, expressed
Sobic.005G154400	Suscepible vs Resistant	5 10 15	Higher in Susceptible	392	366.667	57.2024	396.333	30.168	9	5.19615	10	5.1316	512	56.5066	647	35.0048	16.3333	2.02759	17	2.88675	618.333	15.9409	629	70.8896	1.66667	1.66667	6	3.78594	AT1G58410.1	Disease resistance protein (CC-NBS-LRR class) family	LOC_Os11g34920.1	stripe rust resistance protein Yr10, putative, expressed
Sobic.005G167500	Suscepible vs Resistant	5 10	Lower in Susceptible	161	73.6667	33.5128	61	17.4738	2428	62.8198	3896	348.907	21.3333	9.40449	42.3333	16.3843	3154	306.941	4294.67	154.862	29.6667	11.893	9.66667	6.11919	2283.33	244.126	1311	142.717	AT1G59620.1	Disease resistance protein (CC-NBS-LRR class) family	LOC_Os08g42670.2	resistance protein, putative, expressed
Sobic.005G203500	Suscepible vs Resistant	5 10 15	Higher in Susceptible	392	49.3333	2.848	31	1.52753	0	0	0	0	55.3333	4.84195	39.3333	5.48736	2	2	0	0	51	1.52753	62	15.9478	0	0	0	0	AT1G58400.1	Disease resistance protein (CC-NBS-LRR class) family	LOC_Os11g43420.1	LZ-NBS-LRR class RGA, putative, expressed
Sobic.005G218700	Suscepible vs Resistant	5 10	Lower in Susceptible	161	63.3333	7.88106	65.3333	3.52767	421	21.3854	400.667	25.5365	48	4.16333	58.6667	1.45297	559.667	63.8131	435.333	33.5278	264.333	167.349	87.6667	31.5401	459	37.2872	373.667	25.0355	AT5G43470.1	Disease resistance protein (CC-NBS-LRR class) family	LOC_Os10g04180.1	NB-ARC domain containing protein, expressed
Sobic.006G017400	Suscepible vs Resistant	5 10	Lower in Susceptible	161	3.33333	3.33333	9.66667	5.48736	172	25.1064	161.667	19.8522	4.66667	4.66667	4.33333	2.18581	236	27.5015	239.667	24.6329	6.66667	0.881917	0	0	269	38.0307	217.667	13.8604	AT5G51630.1	Disease resistance protein (TIR-NBS-LRR class) family	LOC_Os04g08390.1	Leucine Rich Repeat family protein, expressed
Sobic.006G017500	Suscepible vs Resistant	10	Lower in Susceptible	95	89.6667	9.9387	53	7.50555	207	17.5024	175	18.9033	68.3333	7.42369	42.3333	6.11919	307.333	37.8829	253.333	8.87568	75.6667	6.17342	50.6667	8.96908	337.333	31.2214	274.667	22.9807	AT1G63350.1	Disease resistance protein (CC-NBS-LRR class) family	LOC_Os04g08390.1	Leucine Rich Repeat family protein, expressed
Sobic.008G023300	Suscepible vs Resistant	5 10 15	Lower in Susceptible	289	14.3333	2.66667	11.3333	5.696	39.6667	4.84195	42.6667	13.1698	13.3333	3.1798	7.33333	0.881917	64.6667	15.899	66.6667	7.68838	16.3333	2.02759	4.33333	2.33333	74.6667	12.252	64.3333	11.4649	AT1G58807.1	Disease resistance protein (CC-NBS-LRR class) family	LOC_Os11g37759.1	stripe rust resistance protein Yr10, putative, expressed
Sobic.008G026100	Suscepible vs Resistant	5 10 15	Lower in Susceptible	289	117.333	6.69162	142.667	12.1289	914.333	25.9765	1311.33	61.5909	77.6667	20.6989	101.667	33.7458	1044	107.406	1731.33	38.6839	104	11.0604	67	8.7178	763.333	16.1898	723.333	106.774	AT1G69550.1	disease resistance protein (TIR-NBS-LRR class)	LOC_Os02g16270.2	xa1, putative, expressed
Sobic.008G027300	Suscepible vs Resistant	10	Lower in Susceptible	95	3	3	2	2	12.6667	7.2188	9.33333	5.20683	5.66667	2.96273	10.6667	1.85592	24.6667	2.72845	10.3333	6.38575	1.66667	1.66667	4.66667	4.66667	20	2.88675	23	2.51661	AT1G69550.1	disease resistance protein (TIR-NBS-LRR class)	LOC_Os01g57310.2	rp1, putative, expressed
Sobic.010G125300	Suscepible vs Resistant	10	Lower in Susceptible	95	30	6.245	13	1	53	5.03322	59.3333	8.00694	23.3333	2.848	16	4.3589	70.6667	7.62306	70	9.53939	23	3.4641	19.3333	4.66667	83	4.04145	72.6667	6.43774	AT1G63350.1	Disease resistance protein (CC-NBS-LRR class) family	LOC_Os04g08390.1	Leucine Rich Repeat family protein, expressed
Sobic.010G130700	Suscepible vs Resistant	10 15	Higher in Susceptible	200	22.6667	1.76383	31.6667	7.85988	10.6667	1.45297	9	0.57735	39.6667	4.33333	52.6667	5.4569	2	2	8.33333	0.333333	43.6667	6.33333	64.6667	4.33333	17	3.4641	14.3333	2.4037	AT2G34930.1	disease resistance family protein / LRR family protein	LOC_Os11g35450.1	leucine-rich repeat receptor protein kinase EXS precursor, putative, expressed
Sobic.005G102300	Suscepible vs Resistant	10	Higher in Susceptible	115	39	17.0098	21.6667	6.35959	37.6667	30.6884	9.66667	2.72845	59	18.1475	21.3333	0.333333	14	4.93288	14.6667	5.17472	32	3.21455	20.3333	3.38296	8.33333	0.881917	8.33333	4.17665	AT5G42510.1	Disease resistance-responsive (dirigent-like protein) family protein	LOC_Os11g10850.1	dirigent, putative, expressed
Sobic.009G021300	Suscepible vs Resistant	5 10 15	Lower in Susceptible	289	3.66667	3.66667	4.66667	2.4037	38	12.1244	38	13.7477	0	0	0	0	21	3	28.3333	2.33333	1.66667	1.66667	4.66667	2.4037	31.6667	6.69162	25.3333	3.66667	AT5G42510.1	Disease resistance-responsive (dirigent-like protein) family protein	LOC_Os12g09700.1	Jacalin-like lectin domain containing protein, putative, expressed
Sobic.008G015400	Suscepible vs Resistant	5 10	Higher in Susceptible	198	181.333	24.8752	127	2.08167	9.33333	6.98411	6.66667	4.05518	182.333	7.35603	97.6667	17.6761	2	2	7.33333	1.20185	172.667	8.87568	95.3333	12.4141	2	2	2.33333	2.33333	AT3G47680.1	DNA binding	LOC_Os06g42890.1	DNA binding protein, putative, expressed
Sobic.006G209600	Suscepible vs Resistant	5 10 15	Higher in Susceptible	392	35	1	36	4.04145	4.66667	2.4037	2	2	30.6667	5.89727	35.6667	1.45297	2	2	7	3.78594	31.3333	2.72845	43	5.68624	4.33333	2.33333	3.33333	1.66667	AT3G47680.1	DNA binding	LOC_Os10g24040.1	transposon protein, putative, Pong sub-class, expressed
Sobic.005G142200	Suscepible vs Resistant	5 10 15	Lower in Susceptible	289	4.66667	2.4037	3.66667	3.66667	124	7.63763	137.667	22.7621	0	0	2.66667	2.66667	134.667	4.8074	148.333	4.37163	4.33333	2.33333	0	0	136	4.6188	141	3.78594	AT3G47680.1	DNA binding	LOC_Os11g14160.1	transposon protein, putative, Pong sub-class, expressed
Sobic.008G095900	Suscepible vs Resistant	5	Higher in Susceptible	107	34.3333	7.42369	10	1.52753	8.66667	0.333333	12.3333	0.333333	20	2.64575	14.6667	2.33333	16.3333	1.66667	17.3333	5.696	50.3333	5.20683	32	4.04145	23.6667	2.848	22.6667	2.848	AT3G48770.1	DNA binding;ATP binding	LOC_Os12g29350.1	ATP binding protein, putative, expressed
Sobic.004G107000	Suscepible vs Resistant	10	Higher in Susceptible	115	32	1.1547	37	6.65833	19	0.57735	13	1	42.6667	2.72845	39	3	8	4.04145	13.6667	1.85592	45.6667	4.17665	84.6667	29.6329	23.3333	0.333333	17.3333	1.20185	AT3G22880.1	DNA repair (Rad51) family protein	LOC_Os11g04954.1	DNA repair protein Rad51, putative, expressed
Sobic.005G002300	Suscepible vs Resistant	10 15	Lower in Susceptible	170	48	1.52753	27	4.16333	100.333	12.1701	102.333	10.0388	27.6667	3.28295	32.6667	6.11919	110.667	17.7044	124	8.0829	44.6667	0.881917	31.6667	7.75314	125.333	14.0989	109.667	10.0885	AT5G60410.5	DNA-binding protein with MIZ/SP-RING zinc finger, PHD-finger and SAP domain	LOC_Os03g50980.1	ATSIZ1/SIZ1, putative, expressed
Sobic.003G060400	Suscepible vs Resistant	5 10 15	Lower in Susceptible	289	26.6667	3.92994	37.3333	4.09607	333	30.6649	330.333	37.2216	25.3333	5.54777	25	6	332	35.2467	341	4.93288	24.3333	3.38296	24	1.52753	263	18.0278	261	25.1595	AT5G28040.1	DNA-binding storekeeper protein-related transcriptional regulator	LOC_Os01g14720.1	transcription regulator, putative, expressed
Sobic.005G110200	Suscepible vs Resistant	5	Higher in Susceptible	107	927.667	49.0793	1006.67	101.804	182	17.3877	185.333	10.1708	556	248.057	649.333	174.196	179.667	6.35959	181.333	3.28295	800.667	64.2115	418	29.7377	185	6.80686	149	6.1101	AT4G21710.1	DNA-directed RNA polymerase family protein
Sobic.007G104600	Suscepible vs Resistant	10 15	Lower in Susceptible	170	2	2	7.66667	0.881917	8.33333	1.20185	10	5.7735	0	0	19.3333	6.17342	16.3333	5.4569	10	5.2915	3.33333	1.66667	43.6667	33.7161	9.66667	1.85592	1.66667	1.66667	AT5G25530.1	DNAJ heat shock family protein	LOC_Os08g28700.1	dnaJ domain containing protein, expressed
Sobic.003G285400	Suscepible vs Resistant	5 10 15	Higher in Susceptible	392	26.3333	5.78312	33.6667	5.696	0	0	0	0	22.6667	3.75648	43	13.0128	0	0	0	0	24	4.50925	30	5.50757	1.66667	1.66667	0	0	AT2G42750.1	DNAJ heat shock N-terminal domain-containing protein	LOC_Os05g45350.1	dnaJ domain containing protein, expressed
Sobic.002G113400	Suscepible vs Resistant	10	Lower in Susceptible	95	55.6667	16.7962	20.6667	6.17342	33.6667	16.231	29.3333	8.00694	19.3333	5.89727	10	5.1316	58.6667	16.5865	63.6667	14.3101	62.6667	4.40959	16.6667	9.26163	66.3333	22.2586	61.6667	11.893	AT5G27240.1	DNAJ heat shock N-terminal domain-containing protein	LOC_Os01g27740.3	dnaJ domain containing protein, expressed
Sobic.003G407700	Suscepible vs Resistant	10 15	Lower in Susceptible	170	11	3.21455	6.33333	3.75648	32.6667	5.4569	32	5.68624	11	6.65833	5.66667	2.848	41.3333	0.881917	35.3333	4.91031	26.3333	3.71184	10	3.60555	48.6667	1.20185	37	2.51661	AT5G53150.1	DNAJ heat shock N-terminal domain-containing protein	LOC_Os01g69930.1	dnaJ domain containing protein, expressed
Sobic.002G239900	Suscepible vs Resistant	10 15	Lower in Susceptible	170	22.3333	3.92994	16.6667	3.1798	33	2.88675	38.3333	6.88799	14	3.51188	14	5.56776	41.3333	4.37163	38.3333	2.33333	25	3.78594	22	3.60555	55.6667	7.83865	37.3333	6.56591	AT1G55790.1	Domain of unknown function (DUF2431)	LOC_Os09g30210.1	expressed protein
Sobic.001G458100	Suscepible vs Resistant	10 15	Lower in Susceptible	170	44.6667	3.4801	38.6667	5.4569	105.333	8.25295	114.333	19.342	35	3.78594	41.3333	9.38675	119.333	19.5306	113	15	37.3333	3.75648	47.3333	4.66667	76.3333	6.06447	88.6667	9.13479	AT5G14620.1	domains rearranged methyltransferase 2	LOC_Os03g02010.4	DNA methyltransferase protein, putative, expressed
Sobic.010G091100	Suscepible vs Resistant	10 15	Higher in Susceptible	200	230.333	19.3764	437.667	33.7458	83	23.1157	85.6667	6.76593	393.667	5.04425	852	171.082	90	32.2335	91.6667	25.7574	298	23.7136	1609	885.299	95.6667	25.4384	202	30.5014	AT2G36800.1	don-glucosyltransferase 1	LOC_Os03g24430.1	cytokinin-O-glucosyltransferase 3, putative, expressed
Sobic.006G009100	Suscepible vs Resistant	10 15	Higher in Susceptible	200	172.667	39.5699	619	202.111	152	15.1767	175.667	10.2686	616	126.808	1164	65.5159	165	38.6566	198.667	61.7099	258	19.0526	2071.33	129.654	118.667	24.8819	257.667	57.5336	AT1G21680.1	DPP6 N-terminal domain-like protein	LOC_Os03g28980.1	WD40-like Beta Propeller Repeat family protein, expressed
Sobic.004G134700	Suscepible vs Resistant	5 10 15	Lower in Susceptible	289	143	2.51661	129	17.088	693.667	12.8755	693	12.8582	204	0.57735	186	30.1054	748	64.221	790	20.8806	66	14.7422	45	7.93725	631.667	34.6426	550.667	2.96273	AT3G06760.1	Drought-responsive family protein	LOC_Os02g20170.1	drought induced 19 protein, putative, expressed
Sobic.002G396600	Suscepible vs Resistant	5 10	Higher in Susceptible	198	90.3333	6.33333	86.6667	23.877	13.6667	4.17665	27.6667	4.17665	92.3333	27.4246	87	17.0392	14	2.64575	14	3.05505	71.3333	17.5246	70.3333	19.342	11.6667	3.38296	17.6667	4.91031	AT3G21520.1	DUF679 domain membrane protein 1	LOC_Os07g45080.1	expressed protein
Sobic.001G430500	Suscepible vs Resistant	5 10 15	Higher in Susceptible	392	242.333	38.6839	145.333	18.4872	6.33333	6.33333	9.66667	6.88799	364.333	78.5988	59.3333	12.8106	7	3.60555	7	4.3589	204.333	6.9602	87.6667	7.51295	1.66667	1.66667	1.66667	1.66667	AT1G60500.1	Dynamin related protein 4C	LOC_Os03g15420.1	dynamin family protein, putative, expressed
Sobic.004G138450	Suscepible vs Resistant	5 10	Higher in Susceptible	198	159	5.2915	150.333	10.5883	4.66667	2.4037	4.66667	2.4037	113	27.5379	151	20.8167	5.66667	3.1798	1.66667	1.66667	100.333	2.33333	100.333	3.92994	0	0	2.66667	2.66667	AT1G10290.1	dynamin-like protein 6	LOC_Os02g50550.1	dynamin, putative, expressed
Sobic.005G118300	Suscepible vs Resistant	10 15	Lower in Susceptible	170	13.3333	3.38296	12	2.08167	32	3	34	2.08167	11	0.57735	13.6667	3.4801	42.6667	4.91031	33	7.93725	5.66667	2.96273	1.66667	1.66667	16.3333	1.20185	14.3333	3.33333	AT1G08500.1	early nodulin-like protein 18	LOC_Os11g29910.1	plastocyanin-like domain containing protein, putative, expressed
Sobic.009G083600	Suscepible vs Resistant	5 10 15	Higher in Susceptible	392	44.6667	11.348	54	3.51188	15.6667	1.76383	17	2.51661	63	2.51661	67	7.0946	12.6667	3.38296	7.66667	4.33333	48.3333	4.70225	58	4.6188	18	1.52753	17	2	AT5G37770.1	EF hand calcium-binding protein family	LOC_Os05g13580.1	OsCML18 - Calmodulin-related calcium sensor protein, expressed
Sobic.003G265600	Suscepible vs Resistant	10	Higher in Susceptible	115	15	2.88675	33.6667	7.88106	9	2.08167	6	0	32	9.53939	61.3333	14.746	6.33333	3.75648	7	3.78594	37.6667	3.52767	58.6667	13.2958	8	4.16333	17.6667	3.75648	AT5G20480.1	EF-TU receptor	LOC_Os11g47290.1	receptor kinase, putative, expressed
Sobic.006G244400	Suscepible vs Resistant	5	Lower in Susceptible	131	30.6667	2.848	47	4.6188	96.3333	5.23874	128.667	33.6171	30	6.65833	133.333	41.297	83	11.1355	93	11.0151	40.6667	8.00694	263	199.021	87.3333	11.6667	108	7.93725	AT1G68290.1	endonuclease 2	LOC_Os04g55850.1	nuclease PA3, putative, expressed
Sobic.003G112600	Suscepible vs Resistant	5 10	Lower in Susceptible	161	2	2	4.66667	2.4037	37.6667	4.8074	22.6667	1.33333	0	0	2	2	44.6667	5.89727	40.6667	3.92994	1.66667	1.66667	0	0	41.3333	4.48454	37.3333	4.63081	AT1G72280.1	endoplasmic reticulum oxidoreductins 1	LOC_Os03g52340.1	endoplasmic oxidoreductin-1 precursor, putative, expressed
Sobic.003G060300	Suscepible vs Resistant	5 10 15	Lower in Susceptible	289	0	0	6.66667	4.05518	86	10.1489	72.3333	10.5251	2	2	2	2	77	8.5049	79.3333	10.8985	1.66667	1.66667	2.66667	2.66667	62.3333	5.36449	69	6.02771	AT1G72280.1	endoplasmic reticulum oxidoreductins 1	LOC_Os03g52340.1	endoplasmic oxidoreductin-1 precursor, putative, expressed
Sobic.005G086300	Suscepible vs Resistant	5	Lower in Susceptible	131	12	0.57735	32.3333	2.33333	37	6.02771	37	5.85947	24.6667	3.66667	17.3333	0.333333	57.3333	14.8586	45	5.50757	15.6667	2.18581	36	8.32666	39.3333	5.92546	43	10.504	AT1G33340.1	ENTH/ANTH/VHS superfamily protein	LOC_Os11g14000.1	ANTH domain containing protein, expressed
Sobic.004G189100	Suscepible vs Resistant	10 15	Higher in Susceptible	200	2	2	24.3333	9.70109	0	0	0	0	8	4.16333	76.3333	11.6094	0	0	0	0	11.3333	3.84419	88.6667	13.1951	0	0	1.66667	1.66667	AT5G10120.1	Ethylene insensitive 3 family protein	LOC_Os02g36510.1	ethylene-insensitive 3, putative, expressed
Sobic.002G243000	Suscepible vs Resistant	10	Higher in Susceptible	115	40	3.78594	43.3333	14.0752	18.3333	3.33333	16.3333	4.09607	54	20.5183	59.6667	13.5319	16.3333	5.23874	11.6667	4.40959	23.3333	3.28295	55.3333	23.9745	9.66667	2.18581	17.6667	3.71184	AT5G10770.1	Eukaryotic aspartyl protease family protein	LOC_Os09g30414.1	aspartic proteinase nepenthesin-2 precursor, putative, expressed
Sobic.010G126400	Suscepible vs Resistant	10	Higher in Susceptible	115	17.3333	3.84419	21.3333	1.85592	9.33333	0.881917	7.66667	0.881917	19.3333	2.02759	13.6667	2.4037	2	2	2	2	18.3333	2.848	14.3333	2.848	2.66667	2.66667	2.66667	2.66667	AT5G10770.1	Eukaryotic aspartyl protease family protein	LOC_Os02g48860.1	aspartic proteinase nepenthesin-2 precursor, putative, expressed
Sobic.008G145200	Suscepible vs Resistant	5 10	Lower in Susceptible	161	15.6667	4.09607	24.6667	7.12585	197.333	59.2659	82	14.1774	25.6667	3.75648	35.3333	12.9142	205	16.6233	83	13.0512	23	1.1547	24.6667	4.09607	83	12.7017	107.667	1.33333	AT2G03200.1	Eukaryotic aspartyl protease family protein	LOC_Os12g39360.1	aspartic proteinase nepenthesin precursor, putative, expressed
Sobic.007G144100	Suscepible vs Resistant	10 15	Lower in Susceptible	170	10.3333	2.18581	9.66667	6.88799	29	2.64575	37.6667	11.8369	10	3.51188	5.66667	3.1798	35	2.51661	26	4	9.33333	0.666667	10.6667	3.4801	35.6667	8.25295	29	4.72582	AT3G56150.2	eukaryotic translation initiation factor 3C	LOC_Os07g03230.1	eukaryotic translation initiation factor 3 subunit C, putative, expressed
Sobic.002G265100	Suscepible vs Resistant	5 10	Higher in Susceptible	198	23.6667	2.02759	22	2.08167	0	0	0	0	37	6.80686	24.3333	5.23874	2	2	1.66667	1.66667	26	1	34.3333	9.38675	0	0	0	0	AT3G11400.2	eukaryotic translation initiation factor 3G1	LOC_Os05g23790.1	retrotransposon, putative, centromere-specific, expressed
Sobic.006G181500	Suscepible vs Resistant	10 15	Higher in Susceptible	200	52	15.695	73.3333	9.33333	23	1.1547	23.3333	6.98411	75.3333	9.82061	75.3333	9.17121	24.3333	5.23874	18.3333	8.41295	72.6667	6.33333	76.3333	17.1691	21.6667	7.66667	28	4.50925	AT3G11400.1	eukaryotic translation initiation factor 3G1	LOC_Os02g54700.2	RNA recognition motif containing protein, putative, expressed
Sobic.002G264900	Suscepible vs Resistant	5 10 15	Higher in Susceptible	392	112.333	9.02466	107	6.35085	4.33333	4.33333	6.66667	6.66667	131.667	17.6289	98	13.5031	2	2	0	0	135.333	4.25572	128.667	5.17472	0	0	0	0	AT3G11400.1	eukaryotic translation initiation factor 3G1	LOC_Os05g23800.1	RNA recognition motif containing protein, putative, expressed
Sobic.004G265200	Suscepible vs Resistant	10 15	Lower in Susceptible	170	28.3333	9.6148	17.6667	2.4037	65.3333	12.9915	70	25.7941	20	1.52753	11.3333	5.78312	51.6667	12.1974	94.6667	30.6938	13.3333	3.4801	10.3333	1.45297	20.6667	3.84419	25.3333	1.85592	AT3G27970.1	Exonuclease family protein	LOC_Os02g47920.1	ZOS2-16 - C2H2 zinc finger protein, expressed
Sobic.005G043100	Suscepible vs Resistant	5 10	Higher in Susceptible	198	110.667	5.89727	80.6667	0.881917	4.66667	2.60342	2	2	74.6667	8.81917	44.6667	10.2035	4	2	5.66667	3.1798	110.333	10.1708	71	14.8436	0	0	0	0	AT5G42540.1	exoribonuclease 2	LOC_Os02g28074.1	XRN 5-3 exonuclease N-terminus family protein, expressed
Sobic.004G213500	Suscepible vs Resistant	5 10 15	Higher in Susceptible	392	37	2.64575	30.6667	0.666667	0	0	0	0	31	8.0829	27.6667	0.881917	0	0	0	0	29.6667	2.4037	13.3333	4.63081	0	0	0	0	AT5G20260.1	Exostosin family protein	LOC_Os02g39960.1	exostosin family protein, putative, expressed
Sobic.004G121900	Suscepible vs Resistant	10	Higher in Susceptible	115	8.66667	1.45297	7.66667	1.66667	6	3	2.66667	2.66667	22.6667	3.38296	8.66667	4.48454	4	2	2	2	13.6667	2.33333	0	0	2.66667	2.66667	0	0	AT1G20190.1	expansin 11	LOC_Os02g16809.1	expansin precursor, putative, expressed
Sobic.003G128800	Suscepible vs Resistant	10 15	Lower in Susceptible	170	106.333	14.1696	71.6667	11.1405	156.333	11.7237	129.667	19.342	39	11.0151	30.3333	6.69162	138.667	27.7208	144.667	15.592	104.667	9.6148	31.3333	10.3976	136	13.3167	134.333	14.4491	AT5G56320.1	expansin A14	LOC_Os01g16770.1	expansin precursor, putative, expressed
Sobic.003G112100	Suscepible vs Resistant	10 15	Lower in Susceptible	170	0	0	2	2	8.33333	4.25572	5.33333	2.66667	0	0	0	0	19.6667	5.4569	8.66667	4.37163	0	0	0	0	9	2.08167	4.33333	2.33333	AT4G01630.1	expansin A17	LOC_Os01g14660.1	expansin precursor, putative, expressed
Sobic.001G301600	Suscepible vs Resistant	10	Higher in Susceptible	115	274.333	95.9415	113.667	29.2935	119.333	13.2958	67.6667	5.92546	440.667	88.5933	53	5.68624	93.6667	11.865	80	7.37111	268.333	50.7488	45	14.9778	50.3333	4.91031	69	14.1067	AT1G65680.1	expansin B2	LOC_Os10g40720.1	expansin precursor, putative, expressed
Sobic.007G048200	Suscepible vs Resistant	10 15	Higher in Susceptible	200	114.333	14.6211	77.3333	17.9103	59.3333	18.9854	33.6667	5.81187	330.333	72.4346	167	21.3776	36.3333	11.8369	34	10.0167	93	22.942	60	7.76745	22.3333	6.11919	65.6667	12.3333	AT1G30760.1	FAD-binding Berberine family protein	LOC_Os08g06170.1	berberine and berberine like domain containing protein, expressed
Sobic.010G162700	Suscepible vs Resistant	10 15	Higher in Susceptible	200	4.66667	2.4037	8	4.6188	0	0	6	3.4641	23	8.5049	4.33333	4.33333	0	0	0	0	1.66667	1.66667	6.33333	4.09607	0	0	2.33333	2.33333	AT5G44410.1	FAD-binding Berberine family protein	LOC_Os06g35590.1	reticuline oxidase-like protein precursor, putative, expressed
Sobic.003G149700	Suscepible vs Resistant	10	Higher in Susceptible	115	6	3	7.33333	1.33333	6	3.78594	9	0.57735	13.3333	1.76383	17.3333	2.72845	2	2	8.33333	0.333333	15	2.51661	15.6667	7.83865	10.3333	1.85592	14.6667	3.4801	AT2G24580.1	FAD-dependent oxidoreductase family protein	LOC_Os01g21380.1	FAD dependent oxidoreductase domain containing protein, expressed
Sobic.002G253400	Suscepible vs Resistant	5 10	Higher in Susceptible	198	87.3333	19.2036	137	21.9621	23.6667	9.13479	27.3333	11.1405	165.333	21.0739	222.667	22.3408	20.3333	4.17665	21.3333	6.76593	139.667	27.2906	243	69.7591	14.3333	2.02759	26	5.85947	AT2G24580.1	FAD-dependent oxidoreductase family protein	LOC_Os09g32290.2	FAD dependent oxidoreductase domain containing protein, expressed
Sobic.001G343700	Suscepible vs Resistant	5 10	Lower in Susceptible	161	0	0	6.66667	3.52767	54	6.02771	53.6667	6.69162	0	0	7	3.51188	46	1.73205	54.3333	2.18581	6.66667	1.66667	0	0	68.3333	6.69162	76	7.63763	AT2G27110.2	FAR1-related sequence 3	LOC_Os08g33270.1	transposon protein, putative, unclassified, expressed
Sobic.001G195550	Suscepible vs Resistant	5 10 15	Lower in Susceptible	289	2	2	2.66667	2.66667	38.3333	5.92546	44.6667	1.45297	0	0	0	0	39	4.04145	35	1.52753	0	0	0	0	52.6667	11.348	41.6667	7.17248	AT4G38180.1	FAR1-related sequence 5	LOC_Os08g20486.1	transposon protein, putative, unclassified, expressed
Sobic.007G115300	Suscepible vs Resistant	5 10	Lower in Susceptible	161	0	0	0	0	23.6667	2.18581	27	3.05505	2	2	0	0	23	4.04145	21.6667	1.20185	3.33333	1.66667	0	0	17.3333	2.848	26.6667	1.76383	AT2G35860.1	FASCICLIN-like arabinogalactan protein 16 precursor	LOC_Os03g57460.1	fasciclin domain containing protein, expressed
Sobic.008G076200	Suscepible vs Resistant	5	Lower in Susceptible	131	8.33333	1.20185	13	4.04145	33.6667	15.4524	36.3333	12.9142	10.6667	1.85592	4	2	18.6667	8.68588	10.6667	2.96273	1.66667	1.66667	1.66667	1.66667	17	8.5049	23	4.16333	AT1G02205.1	Fatty acid hydroxylase superfamily	LOC_Os02g56920.1	WAX2, putative, expressed
Sobic.007G170700	Suscepible vs Resistant	5 10 15	Higher in Susceptible	392	444.333	51.8406	440.667	32.6871	20.3333	7.42369	10	6.08276	298.667	23.877	379.333	10.1708	7.33333	3.66667	13.3333	3.52767	309.333	20.7873	294.333	28.0852	6.66667	0.881917	8.66667	1.20185	AT5G22500.1	fatty acid reductase 1	LOC_Os08g44360.1	male sterility protein 2, putative, expressed
Sobic.005G166000	Suscepible vs Resistant	5 10	Lower in Susceptible	161	0	0	3.33333	3.33333	96.3333	8.25295	85	3.21455	2.33333	2.33333	0	0	84	10.1489	79	6.65833	0	0	0	0	83.6667	6.35959	85.3333	7.66667	AT2G04230.1	FBD, F-box and Leucine Rich Repeat domains containing protein	LOC_Os07g36520.1	OsFBX248 - F-box domain containing protein, expressed
Sobic.010G124133	Suscepible vs Resistant	5 10 15	Higher in Susceptible	392	506.333	42.3884	769	97.0773	15.3333	7.5351	20.6667	7.2188	503.333	62.6906	878	57.4572	8.66667	4.48454	7.33333	1.33333	476.667	21.6128	751.667	22.7621	1.66667	1.66667	7.33333	4.33333	AT3G07870.1	F-box and associated interaction domains-containing protein	LOC_Os09g27570.1	OsFBA3 - F-box and FBA domain containing protein, expressed
Sobic.010G150325	Suscepible vs Resistant	10	Lower in Susceptible	95	9	1.73205	2	2	23.3333	3.33333	21	2	3.33333	3.33333	2	2	30.3333	4.66667	22.3333	5.20683	5	2.88675	7	1	28.6667	1.20185	26	1.73205	AT1G53370.1	F-box and associated interaction domains-containing protein	LOC_Os03g46140.1	OsFBX101 - F-box domain containing protein, expressed
Sobic.008G178000	Suscepible vs Resistant	5 10	Lower in Susceptible	161	10.6667	3.28295	14.3333	7.83865	173.333	6.17342	198.333	6.88799	3.33333	3.33333	7.66667	3.84419	194	9.07377	219.667	12.7061	7.66667	3.92994	0	0	226.333	12.4677	230	13.5277	AT3G22870.1	F-box and associated interaction domains-containing protein	LOC_Os11g37340.1	OsFBX426 - F-box domain containing protein, expressed
Sobic.008G178400	Suscepible vs Resistant	5 10	Lower in Susceptible	161	5.66667	3.1798	4	2	127.667	3.28295	113.333	17.61	0	0	8.66667	1.33333	138	3.51188	135.667	18.415	6.33333	1.33333	1.66667	1.66667	148.333	7.33333	132	7.57188	AT3G22350.1	F-box and associated interaction domains-containing protein	LOC_Os07g02910.1	OsFBL33 - F-box domain and LRR containing protein, expressed
Sobic.003G405400	Suscepible vs Resistant	5 10 15	Lower in Susceptible	289	0	0	0	0	16.6667	2.72845	21.6667	3.38296	0	0	0	0	22.3333	2.33333	17.3333	2.848	1.66667	1.66667	0	0	19	3.51188	11.6667	2.4037	AT3G07870.1	F-box and associated interaction domains-containing protein	LOC_Os06g07380.1	OsFBX188 - F-box domain containing protein, expressed
Sobic.008G178533	Suscepible vs Resistant	5 10 15	Lower in Susceptible	289	2	2	0	0	20.3333	1.20185	14.6667	3.75648	0	0	0	0	13	3.60555	15.6667	2.33333	0	0	0	0	19	1	19	1.52753	AT4G19940.1	F-box and associated interaction domains-containing protein	LOC_Os07g02890.1	OsFBX209 - F-box domain containing protein, expressed
Sobic.007G072800	Suscepible vs Resistant	5	Higher in Susceptible	107	30	3.60555	42.6667	6.48931	10	0.57735	9.66667	1.20185	13.3333	4.91031	25.6667	2.90593	12	1.73205	11.3333	2.66667	28	4.04145	18.6667	3.84419	9	2.08167	9.66667	2.90593	AT1G32020.1	F-box family protein	LOC_Os08g09720.1	OsFBX272 - F-box domain containing protein, expressed
Sobic.006G091850	Suscepible vs Resistant	5 10	Higher in Susceptible	198	164.667	5.4569	191	9.64365	5	2.64575	10.6667	4.66667	184	23.1805	180.333	41.91	5.66667	3.1798	10.6667	2.18581	136.333	9.82061	176	17.9536	0	0	7.66667	3.92994	AT5G49610.1	F-box family protein	LOC_Os07g35070.1	OsFBX239 - F-box domain containing protein, expressed
Sobic.003G326400	Suscepible vs Resistant	5	Lower in Susceptible	131	9	3	21	10.504	158.333	105.024	23.3333	13.5688	107.333	70.5699	27.6667	11.2596	340	112.147	56.6667	28.9501	23.6667	12.7845	0	0	47	25.1595	11.6667	11.6667	AT5G04010.1	F-box family protein	LOC_Os01g58670.1	expressed protein
Sobic.001G324000	Suscepible vs Resistant	5 10	Lower in Susceptible	161	3.33333	3.33333	6.66667	4.05518	99.3333	10.9291	83.6667	8.45248	0	0	2.33333	2.33333	94	9.45163	90.3333	2.96273	1.66667	1.66667	0	0	96	9.2376	64.3333	10.3494	AT5G07610.1	F-box family protein	LOC_Os07g35050.1	OsFBX237 - F-box domain containing protein, expressed
Sobic.005G022700	Suscepible vs Resistant	5 10 15	Lower in Susceptible	289	2.66667	2.66667	9	2.08167	95	3.60555	134	7	4	4	2	2	93.6667	11.4649	121	9.45163	3.33333	1.66667	0	0	95.3333	13.0937	126	17.8979	AT5G07610.1	F-box family protein	LOC_Os02g15160.1	OsFBX40 - F-box domain containing protein, expressed
Sobic.005G170900	Suscepible vs Resistant	5 10 15	Higher in Susceptible	392	159.667	9.70109	189	20.5183	42	5.1316	60	4	195.667	10.729	176.667	21.458	59.6667	4.70225	60.6667	7.85988	172	23.0072	187.333	20.0194	74.6667	1.76383	86	7	AT5G25290.1	F-box family protein with a domain of unknown function (DUF295)	LOC_Os11g39609.1	OsFBDUF64 - F-box and DUF domain containing protein
Sobic.007G005900	Suscepible vs Resistant	5 10 15	Lower in Susceptible	289	0	0	0	0	32.6667	4.84195	16.6667	3.28295	0	0	2	2	32.6667	6.88799	15.6667	5.23874	1.66667	1.66667	2	2	25.6667	0.666667	10.6667	2.18581	AT4G22180.1	F-box family protein with a domain of unknown function (DUF295)	LOC_Os07g31680.1	OsFBL38 - F-box domain and LRR containing protein, expressed
Sobic.003G381500	Suscepible vs Resistant	5	Higher in Susceptible	107	23.3333	0.881917	11.6667	6.00925	0	0	0	0	10.6667	1.85592	10	5	0	0	0	0	26.6667	0.666667	25.6667	2.848	0	0	0	0	AT4G14096.1	F-box/RNI-like superfamily protein	LOC_Os11g09970.1	OsFBX411 - F-box domain containing protein, expressed
Sobic.003G118500	Suscepible vs Resistant	10	Higher in Susceptible	115	19	2	28.3333	3.1798	7.66667	4.33333	3.33333	3.33333	30.3333	3.33333	16.3333	2.4037	5	2.64575	1.66667	1.66667	21.6667	2.66667	14.6667	0.881917	3	3	4.66667	2.33333	AT3G28410.1	F-box/RNI-like superfamily protein	LOC_Os02g06520.1	OsFBLD1 - F-box, LRR and FBD domain containing protein, expressed
Sobic.006G088820	Suscepible vs Resistant	5 10	Higher in Susceptible	198	29	6.245	27.6667	2.90593	0	0	0	0	12.3333	3.1798	19.6667	6.56591	0	0	0	0	40.6667	2.848	30.3333	6.43774	0	0	0	0	AT1G78750.1	F-box/RNI-like superfamily protein	LOC_Os04g35990.1	OsFBX136 - F-box domain containing protein, expressed
Sobic.007G027601	Suscepible vs Resistant	5 10 15	Higher in Susceptible	392	76	6.02771	55.6667	8.98765	20.6667	3.38296	15.3333	3.84419	45.6667	4.37163	33.6667	8.08977	15.6667	4.05518	19	3.21455	76	6.9282	51.3333	5.48736	24.6667	6.17342	19.3333	2.02759	AT3G58900.4	F-box/RNI-like superfamily protein	LOC_Os06g49930.1	OsFBX207 - F-box domain containing protein, expressed
Sobic.008G094800	Suscepible vs Resistant	5 10 15	Higher in Susceptible	392	176.333	10.3976	185.667	22.8059	26	7.37111	37	7	168.333	4.40959	211.333	16.8259	51	16.6533	39.6667	7.05534	213	28.931	168	62.7933	37.3333	17.5341	53.6667	5.36449	AT1G69630.1	F-box/RNI-like superfamily protein	LOC_Os04g13150.1	OsFBX125 - F-box domain containing protein, expressed
Sobic.004G062600	Suscepible vs Resistant	5 10 15	Lower in Susceptible	289	5	2.64575	7.33333	4.66667	108.667	4.66667	111.667	23.2116	5.66667	2.96273	3	3	107.333	12.8366	112.667	4.48454	5	2.88675	11	8.62168	119.333	2.66667	118	9.07377	AT1G13570.1	F-box/RNI-like superfamily protein	LOC_Os04g57920.1	OsFBX154 - F-box domain containing protein, expressed
Sobic.007G072300	Suscepible vs Resistant	5 10 15	Lower in Susceptible	289	0	0	5.66667	3.1798	55.3333	6.17342	53.3333	3.52767	2	2	4.33333	2.18581	60.6667	7.85988	73.6667	17.4579	3.33333	3.33333	0	0	81	9.71253	89.6667	5.92546	AT3G58860.1	F-box/RNI-like superfamily protein	LOC_Os08g09750.1	OsFBL44 - F-box domain and LRR containing protein, expressed
Sobic.010G235600	Suscepible vs Resistant	5 10 15	Lower in Susceptible	289	20	0.57735	30.6667	0.881917	122.667	5.78312	165.667	3.92994	19.3333	4.17665	27	1.1547	132	16.8226	165.333	16.8358	19	2.64575	30	13.5031	154	11.7898	165	7.54983	AT5G18780.1	F-box/RNI-like superfamily protein	LOC_Os06g47100.1	OsFBX203 - F-box domain containing protein, expressed
Sobic.005G163200	Suscepible vs Resistant	10 15	Higher in Susceptible	200	25	4.16333	24.3333	6.00925	8.33333	4.91031	13.3333	2.90593	26.6667	1.45297	25.6667	1.76383	6.33333	3.75648	10.3333	5.17472	30	7.63763	29	7.2111	9.33333	1.33333	9	2.3094	AT1G32375.1	F-box/RNI-like/FBD-like domains-containing protein	LOC_Os07g36530.1	OsFBX249 - F-box domain containing protein, expressed
Sobic.006G088740	Suscepible vs Resistant	5 10 15	Higher in Susceptible	392	67	5.19615	78.6667	10.2686	0	0	2	2	39.6667	5.92546	68.6667	13.6423	0	0	1.66667	1.66667	55.6667	8.11035	47.3333	3.28295	0	0	0	0	AT5G56440.1	F-box/RNI-like/FBD-like domains-containing protein	LOC_Os04g35990.1	OsFBX136 - F-box domain containing protein, expressed
Sobic.003G321800	Suscepible vs Resistant	10 15	Lower in Susceptible	170	25.3333	4.17665	11	2.51661	15.6667	4.8074	16.3333	3.38296	0	0	0	0	20.3333	3.71184	18	7.23418	29.6667	4.25572	14	8.0829	24	4.04145	20	6.80686	AT5G53840.1	F-box/RNI-like/FBD-like domains-containing protein	LOC_Os01g57920.1	OsFBL3 - F-box domain and LRR containing protein, expressed
Sobic.006G012200	Suscepible vs Resistant	5 10 15	Higher in Susceptible	392	142.667	12.8106	116.333	12.1289	33.3333	12.3468	38.6667	4.63081	123.667	14.8137	85.6667	8.66667	33	5.56776	39	6	67.3333	6.38575	122.333	12.7845	28.3333	7.31057	22.3333	1.76383	AT4G28720.1	Flavin-binding monooxygenase family protein	LOC_Os04g03980.1	flavin monooxygenase, putative, expressed
Sobic.001G302732	Suscepible vs Resistant	5 10 15	Higher in Susceptible	392	234	26.5141	263	28.0238	45.3333	0.881917	62.3333	3.84419	159.667	23.6737	195.333	12.9786	38.6667	6.00925	54.6667	1.76383	194.667	17.7044	194.333	17.6761	38.3333	3.1798	41.6667	5.696	AT1G62560.1	flavin-monooxygenase glucosinolate S-oxygenase 3	LOC_Os10g40610.1	flavin-containing monooxygenase family protein, putative, expressed
Sobic.002G074400	Suscepible vs Resistant	5 10	Higher in Susceptible	198	37.6667	5.17472	33	5.85947	3.66667	3.66667	10.3333	2.33333	44.3333	6.17342	47	3.51188	4	2	3.66667	1.85592	31.6667	1.20185	40.3333	6.98411	2	2	5	2.88675	AT5G54500.1	flavodoxin-like quinone reductase 1	LOC_Os05g42190.1	NADPH-dependent FMN reductase domain containing protein, expressed
Sobic.001G132200	Suscepible vs Resistant	5 10	Lower in Susceptible	161	8.33333	4.25572	11.6667	6.17342	165.667	5.23874	207.667	11.865	10.3333	5.36449	7.66667	4.97773	207.333	14.6211	217	11.3725	10.6667	0.666667	2	2	292	51.6817	297.667	44.2807	AT3G12680.1	floral homeotic protein (HUA1)	LOC_Os12g21700.1	zinc finger C-x8-C-x5-C-x3-H type family protein, expressed
Sobic.001G100800	Suscepible vs Resistant	5 10 15	Higher in Susceptible	392	54	4.72582	49.6667	6.88799	8.33333	1.45297	5.66667	3.1798	40	10.0167	59.6667	11.8509	8.66667	1.45297	11.3333	2.66667	55.6667	1.85592	64	14.0475	12.3333	0.333333	12.6667	0.666667	AT5G66380.1	folate transporter 1	LOC_Os03g52430.1	mitochondrial carrier protein, putative, expressed
Sobic.008G177850	Suscepible vs Resistant	5 10	Lower in Susceptible	161	103.667	14.6211	96.3333	12.0046	819.333	29.8068	1755	376.833	90.3333	19.2296	82	14	493.667	67.3902	1568.67	128.777	89	3.21455	57	6	2627	220.636	3836.67	165.177	AT5G41480.1	Folylpolyglutamate synthetase family protein	LOC_Os12g42870.2	Mur ligase family protein, putative, expressed
Sobic.001G287101	Suscepible vs Resistant	5 10 15	Lower in Susceptible	289	7	3.51188	11	2.51661	166.333	7.83865	194.333	9.49269	6	6	8.33333	4.25572	203.667	15.857	163.333	19.4022	8.33333	1.76383	6.33333	0.881917	177.333	11.1405	180	9.45163	AT1G70140.1	formin 8	LOC_Os02g50570.1	retrotransposon protein, putative, unclassified, expressed
Sobic.003G319100	Suscepible vs Resistant	5 10 15	Higher in Susceptible	392	107	8.32666	117.333	8.08977	33	2.64575	35.6667	1.76383	113	1.52753	101.333	8.45248	32.3333	2.66667	34	5.1316	111	12	140.333	11.2891	36.6667	4.17665	33.6667	2.4037	AT4G03240.1	frataxin homolog	LOC_Os01g57460.1	frataxin, putative, expressed
Sobic.001G177400	Suscepible vs Resistant	10 15	Lower in Susceptible	170	30	1.1547	16	2.51661	32	4.72582	23.3333	1.76383	11.6667	2.96273	4.33333	2.18581	32.3333	7.68838	25.6667	1.76383	42.6667	5.84047	30	4.6188	43	4.16333	33.6667	2.90593	AT5G48385.1	FRIGIDA-like protein	LOC_Os03g39129.1	frigida, putative, expressed
Sobic.001G177200	Suscepible vs Resistant	5 10 15	Lower in Susceptible	289	13.3333	2.18581	13	2.51661	44	5.2915	61	5.85947	11.6667	5.89727	10	2.64575	48	10.8167	47.3333	2.02759	13.3333	1.85592	9.33333	2.18581	68.3333	9.95546	70.6667	0.881917	AT5G48385.1	FRIGIDA-like protein	LOC_Os03g39160.1	frigida, putative, expressed
Sobic.004G169966	Suscepible vs Resistant	5 10 15	Lower in Susceptible	289	0	0	2.66667	2.66667	38	2.51661	47.3333	3.92994	0	0	0	0	33.6667	8.21246	36	2.08167	0	0	1.66667	1.66667	37.3333	6.00925	36	1	AT4G15090.1	FRS (FAR1 Related Sequences) transcription factor family	LOC_Os11g41380.1	transposon protein, putative, unclassified, expressed
Sobic.002G225900	Suscepible vs Resistant	10 15	Lower in Susceptible	170	2.66667	2.66667	6	3.4641	13.3333	1.20185	19.6667	3.28295	3.33333	3.33333	14	1.73205	21.3333	3.71184	25.6667	4.25572	0	0	14	4.58258	12.6667	2.60342	19.6667	2.33333	AT2G03220.1	fucosyltransferase 1	LOC_Os09g28460.1	xyloglucan fucosyltransferase, putative, expressed
Sobic.006G105100	Suscepible vs Resistant	5 10	Lower in Susceptible	161	2	2	8	4.04145	29	2.3094	44.3333	7.62306	2	2	2.66667	2.66667	27	2.64575	26.3333	2.02759	8	1.52753	3.66667	1.85592	15	1.52753	24.3333	5.48736	AT3G47800.1	Galactose mutarotase-like superfamily protein	LOC_Os04g38540.1	aldose 1-epimerase, putative, expressed
Sobic.006G105200	Suscepible vs Resistant	5 10	Lower in Susceptible	161	68.3333	4.33333	116.333	17.8357	462.667	97.9546	547.667	156.317	70	11.1505	85.3333	12.6798	533.667	107.161	456	42.5323	40	1.52753	68.6667	25.6407	446	107.593	308.667	50.0877	AT5G15140.1	Galactose mutarotase-like superfamily protein	LOC_Os04g38540.1	aldose 1-epimerase, putative, expressed
Sobic.002G082000	Suscepible vs Resistant	10 15	Higher in Susceptible	200	44.3333	8.21246	44	3.05505	23	2.64575	19.6667	2.60342	80.6667	8.21246	42.3333	2.18581	24.6667	3.71184	17.6667	1.76383	90.3333	5.92546	51	8.5049	21	1.52753	24.6667	3.66667	AT3G07720.1	Galactose oxidase/kelch repeat superfamily protein	LOC_Os09g07460.1	kelch repeat protein, putative, expressed
Sobic.005G204100	Suscepible vs Resistant	10 15	Lower in Susceptible	170	219.667	26.6729	137.667	28.0139	695.333	46.5916	696.333	22.9298	104	13.3167	47.6667	7.62306	591	50.6491	755.333	53.3677	251	9.29157	111.333	59.2799	599.333	31.2748	568	51.3258	AT5G18590.1	Galactose oxidase/kelch repeat superfamily protein	LOC_Os11g43590.4	kelch repeat protein, putative, expressed
Sobic.002G210401	Suscepible vs Resistant	5 10	Higher in Susceptible	198	54.3333	10.0885	24.6667	3.28295	17.6667	0.333333	8.33333	1.20185	91.3333	19.7005	19.6667	2.66667	16	1.52753	12.3333	2.02759	41	5.1316	14.3333	1.85592	9	2.51661	8.33333	1.76383	AT5G57500.1	Galactosyltransferase family protein	LOC_Os09g26310.1	hypro1, putative, expressed
Sobic.002G206900	Suscepible vs Resistant	10	Lower in Susceptible	95	41.6667	2.33333	30	6.4291	67.3333	8.37324	65	15.3079	18	3.60555	21.3333	7.4461	64.3333	11.1405	60	8.96289	71	4.58258	27	6.02771	114.333	17.9103	107.667	16.4756	AT5G49150.1	gamete expressed 2	LOC_Os09g25650.1	GEX2, putative, expressed
Sobic.009G199100	Suscepible vs Resistant	5 10 15	Lower in Susceptible	289	0	0	10	1.52753	30	2.3094	34.3333	0.881917	0	0	4	2	33	1.73205	28.6667	4.66667	9.66667	2.60342	5.33333	2.90593	49	4.50925	38.6667	2.33333	AT1G78680.1	gamma-glutamyl hydrolase 2	LOC_Os05g44130.1	gamma-glutamyl hydrolase precursor, putative, expressed
Sobic.004G132100	Suscepible vs Resistant	5 10 15	Higher in Susceptible	392	56	2	90	13.6137	2	2	0	0	38	10.116	61	16.0728	0	0	3.33333	3.33333	69.6667	8.95048	86.6667	25.0089	0	0	0	0	AT5G24280.1	gamma-irradiation and mitomycin c induced 1	LOC_Os01g13404.1	ATP binding protein, putative, expressed
Sobic.001G182500	Suscepible vs Resistant	10	Higher in Susceptible	115	98	18.61	158	7.54983	38.6667	10.5883	38.3333	9.49269	217.667	12.9915	382.333	112.399	49.6667	6.11919	44.3333	5.89727	270.667	28.1089	933.667	605.306	73.6667	12.9142	80.6667	6.56591	AT5G55050.1	GDSL-like Lipase/Acylhydrolase superfamily protein	LOC_Os03g38470.1	GDSL-like lipase/acylhydrolase, putative, expressed
Sobic.008G124000	Suscepible vs Resistant	10	Higher in Susceptible	115	95.3333	9.02466	82	25.865	121.667	41.3938	50.3333	16.7365	124	18.735	48.6667	10.1708	33	7.37111	32.3333	4.17665	77.6667	9.20748	78	43.2936	22.6667	2.33333	27	2.51661	AT1G28650.1	GDSL-like Lipase/Acylhydrolase superfamily protein	LOC_Os10g25380.1	GDSL-like lipase/acylhydrolase, putative, expressed
Sobic.001G182300	Suscepible vs Resistant	5 10	Higher in Susceptible	198	142.333	4.70225	118.667	18.4962	19.3333	2.66667	16.6667	3.28295	180	10.2632	89.3333	26.5225	24.6667	3.71184	16.6667	1.45297	173.667	5.36449	152	73.8986	23.3333	2.848	19	2.08167	AT4G28780.1	GDSL-like Lipase/Acylhydrolase superfamily protein	LOC_Os03g38390.1	GDSL-like lipase/acylhydrolase, putative, expressed
Sobic.003G020500	Suscepible vs Resistant	10 15	Higher in Susceptible	200	41	5	34.6667	4.40959	23	1.1547	16.6667	3.75648	57	4.50925	51	9.07377	21.3333	1.76383	30.6667	6.69162	49	6	53.6667	19.9109	18	2.51661	26	2.88675	AT1G28670.1	GDSL-like Lipase/Acylhydrolase superfamily protein	LOC_Os01g11750.1	GDSL-like lipase/acylhydrolase, putative, expressed
Sobic.008G048501	Suscepible vs Resistant	10 15	Higher in Susceptible	200	72.3333	18.6756	41	1.73205	26.6667	7.68838	13.3333	5.4569	101	13.2288	23	3.05505	10	2.08167	17.6667	1.20185	37	6.50641	19.3333	10.4775	7.66667	0.333333	11	3.05505	AT1G28580.1	GDSL-like Lipase/Acylhydrolase superfamily protein	LOC_Os01g12320.1	GDSL-like lipase/acylhydrolase, putative, expressed
Sobic.010G270500	Suscepible vs Resistant	5 10 15	Higher in Susceptible	392	30.6667	1.76383	40	4.72582	0	0	2	2	28.3333	9.06152	39.3333	3.28295	2	2	0	0	34.3333	1.76383	113.667	50.1941	0	0	0	0	AT5G55050.1	GDSL-like Lipase/Acylhydrolase superfamily protein	LOC_Os06g50940.1	GDSL-like lipase/acylhydrolase, putative, expressed
Sobic.009G078500	Suscepible vs Resistant	5 10	Lower in Susceptible	161	2474.33	522.489	3838.33	1296.3	16000.7	3452.44	33791	8432.61	2219.67	322.574	7806	2132.88	10228.7	2538.4	18798.7	2887.41	2185.67	339.62	7004	1352.7	9900.67	2296.08	13394.7	785.269	AT5G45910.1	GDSL-like Lipase/Acylhydrolase superfamily protein	LOC_Os05g11910.1	GDSL-like lipase/acylhydrolase, putative, expressed
Sobic.010G001700	Suscepible vs Resistant	10 15	Lower in Susceptible	170	4.33333	4.33333	10	1.52753	20.3333	4.97773	27.6667	3.28295	3.33333	3.33333	8	1.52753	19.3333	2.4037	25.6667	2.60342	8.33333	0.333333	6.33333	0.881917	19.3333	5.696	18.3333	3.84419	AT5G45950.1	GDSL-like Lipase/Acylhydrolase superfamily protein	LOC_Os02g01980.1	GDSL-like lipase/acylhydrolase, putative, expressed
Sobic.003G136200	Suscepible vs Resistant	10	Higher in Susceptible	115	476	99.3596	1191.33	67.8732	206.333	15.7621	202.667	30.6014	821	73.6365	1870	392.016	171	6.08276	164.333	12.252	436.333	21.458	1659.67	200.853	159.333	13.3832	239.333	26.2953	AT1G09560.1	germin-like protein 5	LOC_Os01g18170.1	Cupin domain containing protein, expressed
Sobic.003G060000	Suscepible vs Resistant	5 10 15	Higher in Susceptible	392	76	12.0968	34	10.6927	27.3333	1.45297	28.3333	6.38575	103.667	54.1736	13	5.1316	26	4.16333	27.3333	1.45297	81.3333	2.66667	12	2.3094	32.6667	4.25572	37.6667	5.04425	AT1G09560.1	germin-like protein 5	LOC_Os01g14670.1	Cupin domain containing protein, expressed
Sobic.003G112200	Suscepible vs Resistant	5 10	Lower in Susceptible	161	124.667	9.56266	53.3333	15.1694	513.333	52.8215	404	81.0329	139	31.88	25	3.60555	551	104.806	367.667	42.4356	109.667	10.0388	16.3333	5.23874	535.333	68.1281	483.667	51.4015	AT1G09560.1	germin-like protein 5	LOC_Os01g14670.1	Cupin domain containing protein, expressed
Sobic.006G110850	Suscepible vs Resistant	5	Higher in Susceptible	107	103.667	32.2714	72.6667	22.8498	32.6667	9.82061	48.3333	11.2002	67.6667	17.5721	25.6667	10.2035	56	13.0512	59.3333	7.68838	107	6.55744	121.333	56.5459	65.6667	19.785	60.6667	6.00925	AT5G14920.1	Gibberellin-regulated family protein	LOC_Os04g39110.1	GASR4 - Gibberellin-regulated GASA/GAST/Snakin family protein precursor, expressed
Sobic.002G201500	Suscepible vs Resistant	5 10	Higher in Susceptible	198	74.6667	6.43774	46	9.64365	24.6667	0.881917	21.3333	1.66667	88	22.3681	27.3333	5.23874	28	4.3589	31.3333	4.63081	60.3333	2.96273	49.3333	23.3975	32.6667	3.84419	23.6667	7.68838	AT1G74670.1	Gibberellin-regulated family protein	LOC_Os09g24840.1	GASR10 - Gibberellin-regulated GASA/GAST/Snakin family protein precursor, expressed
Sobic.001G170301	Suscepible vs Resistant	10 15	Lower in Susceptible	170	13.3333	2.02759	3	3	27	8.544	17	1.52753	6.66667	0.333333	2	2	31.6667	4.33333	24.6667	3.1798	10	3.60555	2	2	18.3333	3.4801	19.3333	0.881917	AT2G39540.1	Gibberellin-regulated family protein	LOC_Os03g41060.1	GASR2 - Gibberellin-regulated GASA/GAST/Snakin family protein precursor, putative, expressed
Sobic.004G007133	Suscepible vs Resistant	5 10 15	Higher in Susceptible	392	170	3.51188	153.667	13.3458	6.33333	3.75648	5	5	78.3333	27.9543	107	27.9344	7	1	6.66667	4.05518	132.667	13.1698	116	3.05505	1.66667	1.66667	0	0	AT4G10710.1	global transcription factor C	LOC_Os04g25550.1	FACT complex subunit SPT16, putative, expressed
Sobic.007G089600	Suscepible vs Resistant	5 10 15	Higher in Susceptible	392	135.667	4.66667	100	5.50757	5.33333	3.1798	6.66667	4.05518	67.6667	22.7621	81.3333	22.0177	4	2	8.33333	0.333333	85	5.1316	63.3333	2.96273	0	0	0	0	AT3G15660.1	glutaredoxin 4	LOC_Os01g34620.1	OsGrx_S15.1 - glutaredoxin subgroup II, expressed
Sobic.005G110442	Suscepible vs Resistant	5	Higher in Susceptible	107	33	12.5033	15	6.02771	2	2	0	0	15.6667	9.90511	11.3333	1.85592	8	4.3589	4	2	9	0.57735	15.6667	9.56266	6	1	3.33333	1.66667	AT2G31570.1	glutathione peroxidase 2	LOC_Os11g18170.1	glutathione peroxidase, putative, expressed
Sobic.003G264500	Suscepible vs Resistant	10	Higher in Susceptible	115	29.6667	5.36449	64.6667	6.06447	25.3333	5.36449	20.6667	3.52767	46.3333	4.48454	90.6667	18.7735	12.3333	3.4801	21.3333	4.48454	44.3333	6.33333	82	11.2398	20.6667	10.3494	44.3333	11.6237	AT1G10370.1	Glutathione S-transferase family protein	LOC_Os01g49720.1	glutathione S-transferase, putative, expressed
Sobic.001G514300	Suscepible vs Resistant	5	Higher in Susceptible	107	370.667	87.7902	150	30.6649	74	10.6927	66	20.0749	377	135.094	57.6667	25.5365	129	42.72	121	22.3681	542	83.0983	166.667	75.8339	198.333	43.0362	213.333	31.1359	AT2G47730.1	glutathione S-transferase phi 8	LOC_Os03g04240.1	glutathione S-transferase, putative, expressed
Sobic.001G318500	Suscepible vs Resistant	10	Higher in Susceptible	115	78	9.0185	142	15.5671	33.6667	9.02466	25	4.16333	89.6667	3.84419	287.667	14.1461	26.6667	3.1798	34.3333	8.51143	109.667	3.4801	449.667	152.915	16.6667	4.66667	39	4.58258	AT1G10360.1	glutathione S-transferase TAU 18	LOC_Os10g38470.1	glutathione S-transferase, putative, expressed
Sobic.005G017801	Suscepible vs Resistant	10 15	Higher in Susceptible	200	61.6667	26.3586	203.333	44.5808	23.3333	8.33333	29	3.78594	88.3333	27.8348	214.333	57.3798	18.6667	7.75314	26	4.16333	150.333	30.7752	271	59.6518	15.6667	2.18581	33.3333	3.4801	AT2G29440.1	glutathione S-transferase tau 6	LOC_Os09g29200.1	glutathione S-transferase, putative, expressed
Sobic.007G168800	Suscepible vs Resistant	5 10	Lower in Susceptible	161	2	2	4	2	22.6667	2.848	23	0	0	0	2.66667	2.66667	26	8.18535	20	5	2.33333	2.33333	0	0	25.3333	0.881917	26.3333	3.4801	AT5G41220.1	glutathione S-transferase THETA 3	LOC_Os10g24040.1	transposon protein, putative, Pong sub-class, expressed
Sobic.008G070350	Suscepible vs Resistant	5 10 15	Lower in Susceptible	289	28.3333	2.02759	19.3333	3.92994	124	13.6137	207	7.23418	37.3333	7.83865	21	3.05505	142	32.3471	158	28.5715	33	3.60555	33.3333	6.69162	117	22.4796	163	25.865	AT1G09830.1	Glycinamide ribonucleotide (GAR) synthetase	LOC_Os12g09540.1	phosphoribosylamine--glycine ligase, putative, expressed
Sobic.004G154000	Suscepible vs Resistant	5	Higher in Susceptible	107	50.3333	22.6004	285	182.083	11.6667	2.66667	31.3333	14.4376	41	5.50757	2267.67	304.134	16	10.9697	14.3333	1.85592	18.3333	1.33333	1144.33	415.311	8.33333	3.33333	8.66667	2.02759	AT1G58370.1	glycosyl hydrolase family 10 protein / carbohydrate-binding domain-containing protein	LOC_Os01g04300.1	glycosyl hydrolase family 10 protein, putative, expressed
Sobic.009G119200	Suscepible vs Resistant	10 15	Lower in Susceptible	170	6395.67	3641.74	11500.7	5340.89	15468.3	2902.96	32734.7	10008.5	1456.33	260.856	13527	2730.77	11782.3	1502.46	17026	1528.16	1313	333.155	13200.3	2323.62	7508	1499.13	9961	847.502	AT4G16260.1	Glycosyl hydrolase superfamily protein	LOC_Os05g31140.1	glycosyl hydrolases family 17, putative, expressed
Sobic.009G119400	Suscepible vs Resistant	5 10 15	Lower in Susceptible	289	49.6667	13.1698	55.6667	21.1371	1108.33	72.2065	632.667	215.048	26.6667	7.83865	19.3333	2.60342	675.667	109.065	486.333	49.3772	22	7.37111	7.66667	4.97773	545.333	40.354	405	56.359	AT4G16260.1	Glycosyl hydrolase superfamily protein	LOC_Os05g31140.1	glycosyl hydrolases family 17, putative, expressed
Sobic.003G108500	Suscepible vs Resistant	5 10 15	Lower in Susceptible	289	10	0.57735	7.66667	1.66667	42.6667	10.7134	39.6667	8.08977	13	0.57735	2.33333	2.33333	34	7.81025	33	5.56776	9.66667	1.66667	5.33333	0.333333	23	0.57735	36.6667	1.76383	AT2G41640.1	Glycosyltransferase family 61 protein	LOC_Os01g72610.1	glycosyltransferase, putative, expressed
Sobic.004G127600	Suscepible vs Resistant	5 10 15	Lower in Susceptible	289	15.3333	6.98411	60.3333	33.0118	1114.33	24.6667	604.667	85.0497	12.3333	6.48931	17	1.1547	1243	248.601	838.333	146.606	14	4.58258	10.3333	1.45297	641.667	100.506	563.667	47.0225	AT1G67280.1	Glyoxalase/Bleomycin resistance protein/Dioxygenase superfamily protein	LOC_Os02g17920.1	glyoxalase family protein, putative, expressed
Sobic.005G230100	Suscepible vs Resistant	5	Lower in Susceptible	131	5	2.64575	4.66667	2.4037	23.3333	0.881917	21	0.57735	2.33333	2.33333	2	2	15.3333	0.881917	16	2.51661	0	0	4	4	15.6667	4.25572	16.3333	2.4037	AT2G37650.1	GRAS family transcription factor	LOC_Os11g47870.1	GRAS family transcription factor domain containing protein, expressed
Sobic.005G230300	Suscepible vs Resistant	5	Lower in Susceptible	131	11.3333	2.848	44.3333	17.4005	45	13.8684	51	11.6762	20.6667	6.66667	38.6667	14.1931	31.6667	2.4037	29	3.4641	17.6667	8.68588	48	2.64575	28.6667	7.62306	35	1.1547	AT2G37650.1	GRAS family transcription factor	LOC_Os11g47900.1	SCARECROW, putative, expressed
Sobic.005G229600	Suscepible vs Resistant	5 10	Lower in Susceptible	161	14.6667	6.33333	16.6667	3.1798	197.333	16.3435	194.667	31.0609	4	4	8.33333	2.33333	211	17.9536	186	6.1101	11	1	10.3333	3.1798	203.333	4.33333	178.667	1.33333	AT2G37650.1	GRAS family transcription factor	LOC_Os11g47890.1	GRAS family transcription factor domain containing protein, expressed
Sobic.001G139800	Suscepible vs Resistant	10	Lower in Susceptible	95	85.3333	43.5903	32.6667	11.6094	64.3333	18.5592	55	5.50757	22.6667	0.881917	21.6667	4.8074	62.6667	13.5688	70.6667	30.9318	67.6667	14.881	74.3333	45.8597	91.3333	36.7982	69.3333	9.17121	AT4G37740.1	growth-regulating factor 2	LOC_Os03g47140.1	growth regulating factor protein, putative, expressed
Sobic.007G071700	Suscepible vs Resistant	5 10 15	Higher in Susceptible	392	157	8.88819	162.333	10.8372	11	4.16333	12.3333	5.36449	181.333	13.1698	180.333	21.4269	8.33333	2.33333	11.6667	6.38575	206.667	8.83805	196.333	10.5251	2.33333	2.33333	5	2.88675	AT1G30580.1	GTP binding	LOC_Os08g09940.1	GTP-binding protein, putative, expressed
Sobic.K024000	Suscepible vs Resistant	5 10	Higher in Susceptible	198	174.333	5.04425	192.333	29.4637	14.3333	4.37163	11	3	125.333	36.2691	158.667	16.4756	6.66667	3.38296	12.6667	1.45297	139.667	14.8361	114	14.2244	7.33333	4.33333	5.66667	2.848	AT1G07930.1	GTP binding Elongation factor Tu family protein	LOC_Os03g08010.1	elongation factor Tu, putative, expressed
Sobic.009G070700	Suscepible vs Resistant	5	Lower in Susceptible	131	280.333	120.131	145.333	56.36	1616.67	778.812	650.333	188.282	611.333	87.1805	60.6667	19.3592	832.333	100.602	827	41.7253	284.667	52.362	62.6667	27.3394	559.667	41.1515	434.333	47.6807	AT4G29260.1	HAD superfamily, subfamily IIIB acid phosphatase	LOC_Os05g10210.1	HAD superfamily phosphatase, putative, expressed
Sobic.003G061200	Suscepible vs Resistant	5	Lower in Susceptible	131	15.6667	3.71184	19.6667	0.333333	57.6667	2.96273	51.3333	4.48454	26.3333	6.35959	26	5.50757	57	2	61.3333	2.60342	19.3333	5.66667	19.3333	3.52767	48	2	60.3333	0.881917	AT5G48960.1	HAD-superfamily hydrolase, subfamily IG, 5\'-nucleotidase	LOC_Os01g14810.1	5-nucleotidase domain-containing protein, putative, expressed
Sobic.010G074432	Suscepible vs Resistant	5 10	Lower in Susceptible	161	20.3333	3.52767	21	4.16333	73.3333	7.83865	81.3333	0.333333	15.3333	1.85592	17	4.72582	81.3333	9.70109	82.3333	7.68838	16.3333	4.09607	11.6667	2.02759	71	3.51188	81.3333	5.33333	AT3G18030.1	HAL3-like protein A	LOC_Os06g09910.2	phosphopantothenoylcysteine decarboxylase, putative, expressed
Sobic.007G095300	Suscepible vs Resistant	5 10 15	Lower in Susceptible	289	25.6667	1.33333	43	4.6188	403.333	48.447	439	35.0286	29	7.76745	29.6667	7.83865	410	52.8867	444.333	16.905	21.6667	2.96273	19	4.93288	393.333	15.0148	376.667	22.7327	AT5G45170.1	Haloacid dehalogenase-like hydrolase (HAD) superfamily protein	LOC_Os12g43520.1	cbbY protein-related, putative, expressed
Sobic.009G064200	Suscepible vs Resistant	5 10	Lower in Susceptible	161	2	2	8	4.16333	97.3333	8.35331	95.6667	5.92546	2.33333	2.33333	4	4	86	9.07377	101.333	4.91031	1.66667	1.66667	3.66667	1.85592	72.3333	1.45297	74	3.21455	AT1G15460.1	HCO3- transporter family	LOC_Os05g08430.1	boron transporter protein, putative, expressed
Sobic.008G098500	Suscepible vs Resistant	10	Lower in Susceptible	95	33	4.58258	30.3333	5.78312	75.3333	9.9387	77	2.51661	19.3333	3.4801	29	5.7735	63.3333	4.8074	64.6667	2.72845	32	2.08167	22.3333	2.33333	64.3333	4.05518	61	7.02377	AT5G40290.1	HD domain-containing metal-dependent phosphohydrolase family protein	LOC_Os01g01920.2	HD domain containing protein 2, putative, expressed
Sobic.003G082100	Suscepible vs Resistant	5 10 15	Higher in Susceptible	392	32	9.53939	15.3333	3.4801	3	3	2	2	25	6.4291	12	2.08167	2	2	5	5	15	7.50555	18	3.51188	3.33333	1.66667	1.66667	1.66667	AT5G59720.1	heat shock protein 18.2	LOC_Os01g04360.1	hsp20/alpha crystallin family protein, putative, expressed
Sobic.006G005600	Suscepible vs Resistant	10	Lower in Susceptible	95	12	2.51661	32.6667	21.2158	28	3.78594	20	1.73205	11.6667	5.84047	14	0.57735	68.3333	22.8133	25.6667	7.5351	8.33333	0.881917	11	3.21455	11.6667	1.20185	3.33333	1.66667	AT5G52640.1	heat shock protein 90.1	LOC_Os04g01740.1	heat shock protein, putative, expressed
Sobic.010G164400	Suscepible vs Resistant	10	Higher in Susceptible	115	21.6667	1.45297	23.6667	9.24362	19.6667	5.36449	15.6667	4.33333	56.6667	26.2953	48	31.5119	17.3333	3.4801	18.3333	3.84419	16.3333	1.45297	21.3333	1.85592	12	1.1547	24	3.78594	AT3G24520.1	heat shock transcription factor C1	LOC_Os06g35960.1	HSF-type DNA-binding domain containing protein, expressed
Sobic.003G256500	Suscepible vs Resistant	5	Lower in Susceptible	131	8.66667	1.45297	14	1.1547	47.6667	4.05518	47	2.08167	31	2.51661	26.6667	4.97773	61.6667	1.76383	71.6667	6.83943	14.6667	2.90593	16.6667	1.45297	38	4.93288	51	3.78594	AT5G26690.1	Heavy metal transport/detoxification superfamily protein	LOC_Os01g48710.1	heavy metal-associated domain containing protein, expressed
Sobic.002G420200	Suscepible vs Resistant	5 10 15	Lower in Susceptible	289	0	0	0	0	17.3333	6.35959	10	5.2915	0	0	0	0	22.6667	5.48736	19.6667	4.66667	1.66667	1.66667	0	0	19	2.51661	17.3333	3.84419	AT5G03380.1	Heavy metal transport/detoxification superfamily protein	LOC_Os07g48390.1	proline-rich protein, putative, expressed
Sobic.006G029300	Suscepible vs Resistant	10 15	Lower in Susceptible	170	80.3333	46.1531	16	3.51188	46.3333	28.1681	38	15.3948	19.3333	2.848	9.66667	5.48736	64.3333	22.8789	66.3333	13.6667	89.6667	11.1405	18.6667	10.4137	93	38.9744	65	13.5277	AT5G43530.1	Helicase protein with RING/U-box domain	LOC_Os04g09800.1	SWI/SNF-related matrix-associated actin-dependent regulator of chromatin subfamily A, putative, expressed
Sobic.001G184300	Suscepible vs Resistant	10 15	Higher in Susceptible	200	547	154.696	923	302.318	270.333	96.0579	120.333	16.0451	1293.33	269.528	1510.33	310.113	253	38.9401	145	26.6646	1499.33	79.2661	1156	111.355	325.667	74.1717	248.667	40.3994	AT4G13420.1	high affinity K+ transporter 5	LOC_Os03g37830.1	potassium transporter, putative, expressed
Sobic.010G251700	Suscepible vs Resistant	10	Higher in Susceptible	115	132	7.63763	47	9.16515	71.6667	11.6952	33.6667	3.84419	221.667	38.5242	88	15.0111	57	10.2144	49.6667	5.84047	33.3333	3.1798	6	3.05505	19.3333	1.85592	12	1.52753	AT4G10310.1	high-affinity K+ transporter 1	LOC_Os06g48800.1	OsHKT2;4 - Na+ transporter, expressed
Sobic.010G255400	Suscepible vs Resistant	10 15	Lower in Susceptible	170	34.6667	3.1798	23	0.57735	56.6667	5.17472	64.3333	2.90593	20	5.03322	21	6.08276	56.6667	3.1798	51.3333	6.76593	27	1.1547	40.6667	14.8474	53	7.76745	40.3333	2.33333	AT1G79000.2	histone acetyltransferase of the CBP family 1	LOC_Os02g04490.1	histone acetyltransferase HAC1, putative, expressed
Sobic.004G188000	Suscepible vs Resistant	5 10 15	Lower in Susceptible	289	93	7.63763	139	12.5831	998	38.1051	995.333	21.9874	78.3333	21.3646	157	23.6925	903.333	46.52	1023.33	50.3466	81	8.62168	113.667	5.23874	907	6.02771	942.667	74.093	AT4G40030.2	Histone superfamily protein	LOC_Os06g04030.1	histone H3, putative, expressed
Sobic.007G036550	Suscepible vs Resistant	5 10	Lower in Susceptible	161	7.66667	4.09607	10	5.03322	249.333	18.0216	218.667	20.8992	2	2	5.33333	2.90593	218	18.61	208.667	40.0097	1.66667	1.66667	4.33333	2.33333	204.333	39.9054	196.333	35.0919	AT4G32880.1	homeobox gene 8	LOC_Os01g10320.1	class III HD-Zip protein 8, putative, expressed
Sobic.010G146200	Suscepible vs Resistant	5 10 15	Higher in Susceptible	392	119.667	15.9199	175.667	35.0492	3.66667	1.85592	5	5	88	11	130.667	12.6798	0	0	1.66667	1.66667	84.6667	4.05518	105.333	19.4622	0	0	0	0	AT4G16780.1	homeobox protein 2	LOC_Os06g04870.1	homeobox associated leucine zipper, putative, expressed
Sobic.001G468400	Suscepible vs Resistant	5	Higher in Susceptible	107	72	29.5127	187.667	101.076	19	2.08167	86.3333	39.3503	67.3333	12.8625	691.667	247.63	33	10.1489	51.6667	4.91031	84.3333	22.2436	537	86.9329	94.6667	14.1931	85.6667	9.83757	AT2G18550.1	homeobox protein 21	LOC_Os03g10210.1	homeobox domain containing protein, expressed
Sobic.003G064200	Suscepible vs Resistant	10 15	Higher in Susceptible	200	43.3333	9.59745	77.3333	2.96273	9.66667	9.66667	0	0	45.3333	2.66667	101	13.8684	2	2	2	2	13	1.73205	14.6667	3.38296	2	2	0	0	AT3G09600.1	Homeodomain-like superfamily protein	LOC_Os01g06320.1	MYB family transcription factor, putative, expressed
Sobic.001G150650	Suscepible vs Resistant	10	Lower in Susceptible	95	36.3333	4.33333	32	0.57735	33	4.50925	42.6667	8.08977	9	4.58258	60.6667	25.1816	45.6667	5.54777	40	8.0829	36.3333	10.4775	45.3333	21.2786	48.3333	5.92546	42.6667	5.92546	AT4G13640.2	Homeodomain-like superfamily protein	LOC_Os03g45194.1	oxidoreductase, short chain dehydrogenase/reductase family domain containing protein, expressed
Sobic.006G271900	Suscepible vs Resistant	5 10 15	Lower in Susceptible	289	46	17.3494	29.6667	5.23874	154.333	12.3333	164.333	30.0241	10.3333	6.06447	33.6667	10.4775	121.667	13.1191	173.667	10.8372	102	15.1767	119	12.1244	365.667	10.1708	413.667	37.7374	AT4G25540.1	homolog of DNA mismatch repair protein MSH3	LOC_Os04g58630.2	DNA mismatch repair protein MSH3, putative, expressed
Sobic.008G094300	Suscepible vs Resistant	5 10 15	Higher in Susceptible	392	247.333	25.5103	272.333	66.6692	8	2	8.33333	1.20185	301.333	63.8079	370	15.0997	11	2.51661	6.33333	3.28295	227	34.5977	148	14.1774	7	1.52753	5.66667	3.4801	AT5G23660.1	homolog of Medicago truncatula MTN3	LOC_Os12g29220.1	nodulin MtN3 family protein, putative, expressed
Sobic.008G119600	Suscepible vs Resistant	5 10	Higher in Susceptible	198	121.333	20.0194	107.667	19.0555	10	1.52753	4.66667	2.4037	79.3333	11.392	52.3333	5.78312	11.6667	2.848	8.66667	4.66667	135	10.3923	61.6667	12.4141	13.6667	0.881917	11.6667	2.4037	AT3G50950.1	HOPZ-ACTIVATED RESISTANCE 1	LOC_Os06g16450.1	Leucine Rich Repeat family protein, expressed
Sobic.010G087500	Suscepible vs Resistant	5 10 15	Higher in Susceptible	392	46.3333	9.20748	29.6667	4.63081	12	3	9.66667	5.04425	32	7.37111	17.6667	2.4037	10.6667	1.66667	6.66667	1.20185	30.6667	1.45297	29.6667	9.02466	8.66667	2.72845	1.66667	1.66667	AT5G51440.1	HSP20-like chaperones superfamily protein	LOC_Os06g11610.1	heat shock 22 kDa protein, mitochondrial precursor, putative, expressed
Sobic.001G520500	Suscepible vs Resistant	10 15	Lower in Susceptible	170	23.3333	3.38296	16.3333	1.76383	29.6667	3.38296	25.3333	2.33333	9	1	16	2.08167	26	0.57735	34.3333	2.96273	19.3333	1.66667	25	4.16333	31	9.71253	28	4.04145	AT5G53400.1	HSP20-like chaperones superfamily protein	LOC_Os06g12530.1	CS domain containing protein, putative, expressed
Sobic.002G221800	Suscepible vs Resistant	5 10 15	Lower in Susceptible	289	0	0	0	0	21.3333	3.38296	19.3333	0.666667	0	0	0	0	19	4.6188	30	1.52753	0	0	0	0	26.6667	4.25572	28	2.3094	AT4G24960.1	HVA22 homologue D	LOC_Os08g36440.1	HVA22, putative, expressed
Sobic.007G076100	Suscepible vs Resistant	5	Higher in Susceptible	107	40.6667	15.2133	19.6667	5.20683	13	2.3094	16.3333	1.85592	32.3333	5.4569	5.33333	2.90593	14.6667	5.66667	10.3333	2.60342	38.6667	3.84419	21	6.65833	14.6667	2.33333	19	2.08167	AT4G24510.1	HXXXD-type acyl-transferase family protein	LOC_Os04g52164.1	transferase family protein, putative, expressed
Sobic.010G238600	Suscepible vs Resistant	10	Higher in Susceptible	115	64.6667	13.1698	108.333	29.762	63.3333	3.52767	40	8.3865	72	13.6504	81	33.126	25	6.02771	26	4.04145	65.3333	15.8149	48.6667	5.20683	32	2.64575	43.3333	4.91031	AT3G29590.1	HXXXD-type acyl-transferase family protein	LOC_Os04g51660.1	transferase family protein, putative, expressed
Sobic.010G179900	Suscepible vs Resistant	10 15	Higher in Susceptible	200	28.3333	0.333333	16.3333	4.40959	11.3333	2.848	7	3.60555	38	8.5049	10	3.51188	13	3.05505	13	0.57735	56.6667	4.17665	8.33333	2.02759	16.3333	2.02759	16.3333	5.48736	AT3G62160.1	HXXXD-type acyl-transferase family protein	LOC_Os06g39390.1	transferase family protein, putative, expressed
Sobic.006G020200	Suscepible vs Resistant	5	Lower in Susceptible	131	126.333	33.4182	93.3333	30.2343	832.667	178.535	536.333	189.512	264.667	74.7024	96.6667	6.56591	663.667	189.452	599	259.356	69.3333	7.83865	29.3333	8.29324	470	148.956	409	96.3967	AT3G62160.1	HXXXD-type acyl-transferase family protein	LOC_Os04g09260.1	transferase family protein, putative, expressed
Sobic.001G273200	Suscepible vs Resistant	10 15	Lower in Susceptible	170	12	1.52753	9	2.08167	25	2.51661	24	2.51661	11	2.08167	4.33333	2.18581	29	5.56776	23	2.64575	30	2.3094	2	2	35.6667	1.76383	36.3333	8.08977	AT5G17540.1	HXXXD-type acyl-transferase family protein	LOC_Os10g11980.1	transferase family protein, putative, expressed
Sobic.006G020300	Suscepible vs Resistant	5 10 15	Lower in Susceptible	289	186.333	12.8366	183.667	13.4205	1537	374.725	1133	412.253	298.333	40.4818	233	69.0966	1380.33	410.895	1441	681.066	205.667	11.2596	112.667	29.6723	979.333	403.931	879.333	171.597	AT3G62160.1	HXXXD-type acyl-transferase family protein	LOC_Os04g11810.1	transferase family protein, putative, expressed
Sobic.003G068900	Suscepible vs Resistant	5 10	Higher in Susceptible	198	40.3333	8.66667	44.3333	22.5856	9	5.19615	12	6.02771	108.333	36.6848	17	8.73689	7.33333	3.84419	12.3333	6.48931	49.6667	28.4273	14.6667	6.11919	46.3333	28.7073	45.6667	26.8597	AT5G48930.1	hydroxycinnamoyl-CoA shikimate/quinate hydroxycinnamoyl transferase	LOC_Os08g43040.1	transferase family protein, putative, expressed
Sobic.002G062000	Suscepible vs Resistant	5	Higher in Susceptible	107	145.667	23.4473	64	3.51188	40	6.4291	24	3.51188	89	11.5036	42.6667	12.252	33	4.6188	23.6667	1.45297	137.667	19.7512	36	6	42	10.4083	29.6667	3.71184	AT3G25690.1	Hydroxyproline-rich glycoprotein family protein	LOC_Os07g09040.1	peptidyl-prolyl cis-trans isomerase, FKBP-type, putative, expressed
Sobic.002G030650	Suscepible vs Resistant	10	Lower in Susceptible	95	74.3333	6.98411	62.3333	19.2209	194	71.3583	113	45.2143	154	47.1734	53	14.1774	808.667	386.441	216.333	153.004	86	1.52753	24	6.50641	230.333	125.339	114.667	47.4213	AT5G09530.1	hydroxyproline-rich glycoprotein family protein	LOC_Os07g04950.1	retrotransposon protein, putative, unclassified, expressed
Sobic.009G078200	Suscepible vs Resistant	5 10 15	Lower in Susceptible	289	86.6667	9.38675	103.667	4.97773	902.333	27.6426	1054.67	60.1674	64.3333	10.8372	92	12.5033	830	79.0084	986.667	4.37163	67	1	73.6667	6.11919	977.333	2.18581	914.333	62.5282	AT5G58210.1	hydroxyproline-rich glycoprotein family protein	LOC_Os02g42550.1	expressed protein
Sobic.010G179000	Suscepible vs Resistant	5 10 15	Lower in Susceptible	289	0	0	0	0	27	7.37111	37	8.73689	0	0	0	0	19.3333	2.848	33	4.58258	0	0	0	0	23.6667	6.48931	35.3333	1.45297	AT4G15550.1	indole-3-acetate beta-D-glucosyltransferase	LOC_Os06g39270.1	UDP-glucoronosyl and UDP-glucosyl transferase domain containing protein, expressed
Sobic.010G179150	Suscepible vs Resistant	5 10 15	Lower in Susceptible	289	5.33333	2.90593	6	0	142.667	10.9899	101	4.93288	0	0	0	0	125	24.5425	89	1	0	0	0	0	47	3.05505	47.3333	7.88106	AT4G15550.1	indole-3-acetate beta-D-glucosyltransferase	LOC_Os06g39330.1	UDP-glucoronosyl and UDP-glucosyl transferase domain containing protein, expressed
Sobic.006G075700	Suscepible vs Resistant	5 10	Higher in Susceptible	198	46.3333	4.91031	35	8.32666	15	1.1547	14.6667	1.45297	51.3333	9.9387	12.6667	4.40959	9.33333	2.02759	13.6667	4.09607	28	1	19.6667	5.84047	10	3.51188	11	1.52753	AT5G64667.1	inflorescence deficient in abscission (IDA)-like 2	LOC_Os04g58940.1	expressed protein
Sobic.004G169700	Suscepible vs Resistant	5 10	Higher in Susceptible	198	53	4.3589	105	19.2873	19.3333	1.45297	23	3.51188	88.6667	5.54777	152	8.62168	17.3333	2.33333	18	2.64575	62.3333	6.69162	330.333	199.12	18.6667	1.20185	22.3333	2.72845	AT3G18715.1	inflorescence deficient in abscission (IDA)-like 4
Sobic.009G133900	Suscepible vs Resistant	5 10 15	Lower in Susceptible	289	9.33333	0.881917	9	4.72582	98	13.0512	104	11.2694	10	1.52753	10.3333	3.84419	85	8.96289	101	10.504	9.66667	2.4037	8.66667	0.666667	117.333	18.5502	107.667	9.38675	AT5G18860.1	inosine-uridine preferring nucleoside hydrolase family protein	LOC_Os05g33644.1	inosine-uridine preferring nucleoside hydrolase family protein, putative, expressed
Sobic.004G359800	Suscepible vs Resistant	5 10	Higher in Susceptible	198	79.6667	5.84047	95	16.0104	0	0	4	4	37.3333	18.8886	70.6667	17.7044	3	3	2	2	74	7.57188	64.3333	3.84419	1.66667	1.66667	4.66667	2.60342	AT3G02870.1	Inositol monophosphatase family protein	LOC_Os03g39000.1	inositol-1-monophosphatase, putative, expressed
Sobic.009G151600	Suscepible vs Resistant	10 15	Higher in Susceptible	200	7	1	23.6667	5.78312	3	3	13.3333	2.33333	14	4.93288	48	10.7858	0	0	6.33333	3.28295	7	2	48.3333	32.6616	7.66667	2.18581	5	2.88675	AT5G61890.1	Integrase-type DNA-binding superfamily protein	LOC_Os05g36100.1	AP2 domain containing protein, expressed
Sobic.007G077300	Suscepible vs Resistant	5 10 15	Higher in Susceptible	392	90.3333	22.9298	192.333	64.9521	3	3	8.66667	5.92546	103	19.4679	333	238.563	8.33333	8.33333	3.66667	1.85592	83.3333	2.4037	97	19.6554	0	0	0	0	AT1G12980.1	Integrase-type DNA-binding superfamily protein	LOC_Os04g52090.1	AP2 domain containing protein, expressed
Sobic.006G184700	Suscepible vs Resistant	5	Lower in Susceptible	131	2	2	4.33333	4.33333	23	7.50555	8.33333	1.20185	4	4	35.3333	28.8348	9.66667	1.85592	9.33333	3.84419	5	2.51661	0	0	9	2.64575	7	4.04145	AT2G36450.1	Integrase-type DNA-binding superfamily protein	LOC_Os02g45420.1	AP2 domain containing protein, expressed
Sobic.003G390600	Suscepible vs Resistant	5 10 15	Lower in Susceptible	289	8.33333	1.45297	10	5.03322	29.6667	3.66667	33.3333	3.52767	2.33333	2.33333	5.33333	2.90593	37.3333	5.48736	31.3333	2.33333	12	2.51661	7.33333	2.33333	25.6667	4.97773	25	3.21455	AT5G17430.1	Integrase-type DNA-binding superfamily protein	LOC_Os01g67410.1	AP2/EREBP transcription factor BABY BOOM, putative, expressed
Sobic.005G036600	Suscepible vs Resistant	5 10 15	Lower in Susceptible	289	59	9.71253	72.3333	9.49269	318.667	25.208	357.667	61.7639	54.3333	4.40959	70.6667	7.88106	319.667	35.6339	322.333	27.7869	61.3333	7.51295	51.6667	2.33333	238.667	20.7311	241	28.5715	AT3G52870.1	IQ calmodulin-binding motif family protein	LOC_Os12g05420.1	calmodulin-binding protein, putative, expressed
Sobic.001G514500	Suscepible vs Resistant	5 10 15	Higher in Susceptible	392	27.6667	5.20683	42	8.544	5.66667	0.333333	3.66667	3.66667	29.3333	9.20748	56.6667	16.5764	3	3	7.66667	4.97773	33	1.52753	26	5.85947	0	0	6.33333	1.33333	AT3G51380.1	IQ-domain 20	LOC_Os03g04210.1	IQ calmodulin-binding motif family protein, putative, expressed
Sobic.002G407800	Suscepible vs Resistant	10 15	Lower in Susceptible	170	17.6667	3.52767	15.3333	3.71184	24.3333	2.33333	25.3333	5.92546	6.33333	3.75648	16	1.52753	22.6667	4.97773	25.6667	2.4037	27.6667	5.23874	25	6.55744	54	1.52753	57.6667	1.45297	AT5G20040.1	isopentenyltransferase 9	LOC_Os06g51350.1	IPP transferase, putative, expressed
Sobic.001G482600	Suscepible vs Resistant	5	Lower in Susceptible	131	87	32.1299	347	163.698	300.667	46.5093	101.333	23.3833	102.333	24.7678	454.333	357.438	73.3333	20.7873	28.3333	4.05518	108.667	25.1816	181.667	4.70225	198	56.7891	70.3333	4.33333	AT1G19180.1	jasmonate-zim-domain protein 1	LOC_Os03g08330.1	ZIM domain containing protein, putative, expressed
Sobic.001G259600	Suscepible vs Resistant	5	Lower in Susceptible	131	0	0	41.3333	20.3825	22	3.51188	21.6667	6.98411	3.66667	3.66667	37.6667	19.785	7.33333	3.66667	0	0	9.66667	6.11919	17	1.52753	30.6667	4.05518	13.6667	1.45297	AT3G43440.1	jasmonate-zim-domain protein 11	LOC_Os03g08330.1	ZIM domain containing protein, putative, expressed
Sobic.001G259700	Suscepible vs Resistant	5	Lower in Susceptible	131	4.66667	2.4037	115.667	47.1887	55	9.64365	90.6667	32.6309	11.6667	6.64162	80.6667	35.6199	18	4.04145	7.33333	5.04425	15	5.50757	41.6667	18.8532	92.3333	20.955	27	2	AT3G43440.1	jasmonate-zim-domain protein 11	LOC_Os10g25230.1	ZIM domain containing protein, putative, expressed
Sobic.004G144200	Suscepible vs Resistant	10 15	Lower in Susceptible	170	23.3333	8.96908	11.6667	5.89727	43	2.08167	34.6667	9.8714	17	3.21455	12.6667	2.33333	44.3333	11.893	35.3333	0.881917	27	2	13	4.04145	56.6667	5.92546	53.3333	1.66667	AT3G11980.1	Jojoba acyl CoA reductase-related male sterility protein	LOC_Os03g07140.1	male sterility protein, putative, expressed
Sobic.003G276901	Suscepible vs Resistant	10 15	Higher in Susceptible	200	43.6667	7.4461	50.3333	6.11919	26	4.58258	27.3333	1.76383	50.3333	7.68838	49.6667	6.22718	14.6667	4.91031	25.3333	4.37163	52.3333	2.96273	78.3333	8.17177	32.6667	4.91031	39.3333	0.881917	AT4G10070.1	KH domain-containing protein	LOC_Os08g01930.1	KH domain-containing protein, putative, expressed
Sobic.009G030200	Suscepible vs Resistant	10 15	Lower in Susceptible	170	24	16.0416	13.6667	2.66667	6	3.4641	8.66667	4.37163	3.33333	3.33333	19	1.1547	18.6667	2.33333	21.6667	3.84419	12.6667	0.881917	101.333	82.3657	12	3.05505	11	1.52753	AT1G23380.1	KNOTTED1-like homeobox gene 6	LOC_Os05g03884.1	homeobox protein knotted-1-like 6, putative, expressed
Sobic.001G106200	Suscepible vs Resistant	10 15	Lower in Susceptible	170	29.6667	29.6667	0	0	0	0	3.33333	3.33333	0	0	0	0	16.3333	2.72845	16	3.05505	11.6667	2.90593	95	95	0	0	0	0	AT4G08150.1	KNOTTED-like from Arabidopsis thaliana	LOC_Os03g51690.2	Homeobox domain containing protein, expressed
Sobic.004G236000	Suscepible vs Resistant	5	Lower in Susceptible	131	7	3.60555	31.3333	9.82061	43.6667	32.6871	25.3333	12.9786	45.6667	25.0954	413.333	52.9224	71.6667	43.2448	17.3333	5.20683	20.6667	3.71184	799.333	746.296	16.6667	1.76383	27.3333	13.9324	AT5G09360.1	laccase 14	LOC_Os02g51440.1	laccase precursor protein, putative, expressed
Sobic.001G392500	Suscepible vs Resistant	5 10 15	Higher in Susceptible	392	53	6.9282	46.6667	3.52767	2	2	2.66667	2.66667	33.3333	1.66667	29	2.88675	2	2	2	2	41.6667	1.76383	24	2.3094	0	0	0	0	AT1G36280.1	L-Aspartase-like family protein	LOC_Os03g19930.1	adenylosuccinate lyase, putative, expressed
Sobic.003G366200	Suscepible vs Resistant	10 15	Higher in Susceptible	200	41.6667	13.4825	96	21.362	29.6667	5.78312	25	1.52753	60	6.9282	114	34.4287	21.6667	2.33333	26.3333	5.60753	72.3333	12.0324	170	29.5014	22.6667	6.38575	62.6667	5.48736	AT2G35460.1	Late embryogenesis abundant (LEA) hydroxyproline-rich glycoprotein family	LOC_Os01g64450.1	harpin-induced protein 1 domain containing protein, expressed
Sobic.005G021800	Suscepible vs Resistant	10 15	Higher in Susceptible	200	31.6667	5.92546	39.3333	10.6823	19.3333	3.52767	14.6667	4.8074	50.6667	5.04425	59	10.2632	17.3333	3.1798	17.6667	3.1798	51	6.4291	79	22.5019	16.3333	1.20185	29.3333	4.37163	AT2G27080.2	Late embryogenesis abundant (LEA) hydroxyproline-rich glycoprotein family	LOC_Os12g03370.1	harpin-induced protein 1 domain containing protein, expressed
Sobic.003G331500	Suscepible vs Resistant	5 10 15	Lower in Susceptible	289	2	2	2.66667	2.66667	28	6.55744	49.3333	0.666667	2.33333	2.33333	10.6667	6.35959	20	5.68624	20	3.05505	0	0	3.33333	3.33333	13.6667	2.02759	20	2	AT2G27080.2	Late embryogenesis abundant (LEA) hydroxyproline-rich glycoprotein family	LOC_Os01g59680.1	NHL25, putative, expressed
Sobic.003G251600	Suscepible vs Resistant	10 15	Higher in Susceptible	200	26.6667	1.66667	47.6667	2.90593	13.3333	2.02759	18.6667	3.1798	52.3333	4.70225	73.3333	12.0046	18.3333	1.20185	16	1	44.3333	8.29324	76.3333	18.3515	21	1.73205	38	2.51661	AT1G34300.1	lectin protein kinase family protein	LOC_Os01g48000.1	S-locus-like receptor protein kinase, putative, expressed
Sobic.002G176700	Suscepible vs Resistant	10 15	Lower in Susceptible	170	31	2.08167	15	1.52753	37.3333	1.76383	34.3333	2.02759	14	2.51661	15.6667	2.33333	38	12.5831	50	2.51661	28.6667	1.45297	27	9.0185	45.6667	1.45297	49	9.29157	AT1G07650.1	Leucine-rich repeat transmembrane protein kinase	LOC_Os09g17630.1	receptor-like protein kinase 2, putative, expressed
Sobic.003G069700	Suscepible vs Resistant	5 10	Lower in Susceptible	161	4.66667	2.4037	4.66667	2.4037	80.6667	4.8074	79.6667	3.84419	0	0	2	2	90	9.53939	74.6667	4.33333	1.66667	1.66667	0	0	99.6667	2.02759	80.3333	3.71184	AT3G47570.1	Leucine-rich repeat protein kinase family protein	LOC_Os01g05960.1	receptor kinase, putative, expressed
Sobic.003G069875	Suscepible vs Resistant	5 10	Higher in Susceptible	198	93	6.08276	144.667	4.91031	5.66667	3.1798	4.66667	2.4037	114	24.1109	148	11.6762	7	4.3589	1.66667	1.66667	92.6667	12.441	136.667	15.5599	1.66667	1.66667	1.66667	1.66667	AT3G47570.1	Leucine-rich repeat protein kinase family protein	LOC_Os01g05960.1	receptor kinase, putative, expressed
Sobic.003G070025	Suscepible vs Resistant	5 10	Higher in Susceptible	198	665	71.1407	1013.33	30.7806	167.667	15.6027	204	5.50757	862.333	52.7015	1249.33	219.466	140	21.166	207.667	31.6667	632.667	95.8407	1040.67	26.4344	241	25.5408	249.667	46.8413	AT3G47570.1	Leucine-rich repeat protein kinase family protein	LOC_Os01g05960.1	receptor kinase, putative, expressed
Sobic.003G265701	Suscepible vs Resistant	10	Higher in Susceptible	115	22	3.21455	32	2.08167	5	2.64575	4.66667	2.4037	43.6667	5.20683	70.3333	22.0479	5	2.64575	1.66667	1.66667	50.3333	4.40959	72	22.3681	1.66667	1.66667	4.66667	2.60342	AT2G24130.1	Leucine-rich receptor-like protein kinase family protein	LOC_Os01g49910.1	expressed protein
Sobic.003G265900	Suscepible vs Resistant	5 10 15	Higher in Susceptible	392	317.333	14.1107	262	19.5021	72.3333	7.51295	66.6667	6.17342	632	24.0069	483.333	49.0045	81.3333	3.71184	88	5.68624	222.667	1.20185	214.333	48.502	128.667	5.81187	129.333	9.02466	AT5G46330.1	Leucine-rich receptor-like protein kinase family protein	LOC_Os11g46980.1	receptor-like protein kinase 2 precursor, putative, expressed
Sobic.004G045000	Suscepible vs Resistant	10	Higher in Susceptible	115	44.6667	10.2686	55	10.4403	14	6.1101	12	2.08167	59	4.93288	51.3333	7.31057	19	3.21455	12.6667	1.45297	50.3333	6.43774	77	6.245	13.6667	4.25572	14.6667	0.333333	AT1G72300.1	Leucine-rich receptor-like protein kinase family protein	LOC_Os02g05980.1	phytosulfokine receptor precursor, putative, expressed
Sobic.004G045500	Suscepible vs Resistant	5 10 15	Higher in Susceptible	392	112.333	30.1901	45	5.2915	17.6667	2.90593	19	6.65833	80.3333	3.38296	19	7	25	5	23.3333	7.2188	105.667	6.17342	18.6667	7.4461	21.6667	5.78312	19.3333	2.33333	AT1G72300.1	Leucine-rich receptor-like protein kinase family protein	LOC_Os02g06180.1	phytosulfokine receptor precursor, putative, expressed
Sobic.004G214900	Suscepible vs Resistant	5 10	Lower in Susceptible	161	124	36.2537	299.333	130.07	15705.3	5310.28	9430	905.838	77.3333	29.5879	148	30.6649	16367.3	3492.36	11561.7	1717.29	119	46.0036	33	11.5902	14996.7	3635.98	15468.3	1567.51	AT3G47570.1	Leucine-rich repeat protein kinase family protein	LOC_Os02g40240.2	receptor kinase, putative, expressed
Sobic.004G217500	Suscepible vs Resistant	5	Lower in Susceptible	131	196.667	51.8213	376	136.236	890.667	368.488	781.667	125.372	411	147.959	1.06761e+07	1.0675e+07	1543	250.189	857	154.068	441	100.539	816	399.184	988	215.282	1087.33	133.744	AT3G47570.1	Leucine-rich repeat protein kinase family protein	LOC_Os02g40180.1	receptor-like protein kinase 5 precursor, putative, expressed
Sobic.005G019300	Suscepible vs Resistant	5 10 15	Higher in Susceptible	392	42.6667	2.848	62	11.9304	8.33333	4.40959	6.66667	4.05518	45	10.4083	85.6667	8.45248	5	2.64575	6.66667	4.05518	72.3333	5.78312	114.333	35.2341	12	1.1547	12	2.64575	AT3G47570.1	Leucine-rich repeat protein kinase family protein	LOC_Os11g29790.1	receptor kinase, putative, expressed
Sobic.005G038800	Suscepible vs Resistant	5 10 15	Lower in Susceptible	289	6	0	2.66667	2.66667	40	4.50925	39.6667	2.90593	0	0	2	2	36	4.04145	43.3333	6.69162	4	2.08167	1.66667	1.66667	52	5.50757	44	2.88675	AT3G47570.1	Leucine-rich repeat protein kinase family protein	LOC_Os07g03000.1	receptor-like protein kinase precursor, putative, expressed
Sobic.005G055900	Suscepible vs Resistant	10	Lower in Susceptible	95	1182.67	175.029	2123.67	86.7954	4306.33	407.035	8010.67	165.913	1722	356.926	2963.67	186.689	6848	222.469	7974.67	218.267	1103.33	124.495	2120.67	176.033	4923	638.217	5706.67	235.124	AT3G47570.1	Leucine-rich repeat protein kinase family protein	LOC_Os11g07260.1	expressed protein
Sobic.005G065000	Suscepible vs Resistant	5 10 15	Lower in Susceptible	289	8.33333	4.17665	11	5.68624	271.667	84.2938	191	43.2666	0	0	9.33333	1.20185	292.333	32.2197	217	84.5005	6.66667	3.38296	1.66667	1.66667	273.333	85.7406	432.667	120.832	AT3G47570.1	Leucine-rich repeat protein kinase family protein	LOC_Os11g07260.1	expressed protein
Sobic.005G094500	Suscepible vs Resistant	5 10	Lower in Susceptible	161	10	5.50757	11.6667	2.18581	280.667	14.4261	320	15.2753	2.33333	2.33333	6.33333	3.28295	270.667	15.857	310	14.9778	6.66667	3.75648	7.66667	1.45297	267.667	15.836	308.333	10.3976	AT2G37050.3	Leucine-rich repeat protein kinase family protein	LOC_Os11g01200.2	senescence-induced receptor-like serine/threonine-protein kinase precursor, putative, expressed
Sobic.005G205100	Suscepible vs Resistant	5 10	Higher in Susceptible	198	332.667	102.17	638.333	204.084	50.6667	17.477	41	10.2632	898.333	285.443	1428.67	502.968	60.6667	11.6094	35.6667	11.2891	874.333	139.691	993	173.564	33.6667	5.17472	30.6667	2.4037	AT3G47570.1	Leucine-rich repeat protein kinase family protein	LOC_Os11g41100.1	expressed protein
Sobic.005G205300	Suscepible vs Resistant	5 10	Higher in Susceptible	198	373.667	131.555	688.333	243.171	47.6667	21.4035	41.3333	7.79601	1060	290.007	1743.67	637.564	48.6667	10.9899	34.6667	12.3468	1042	195.679	1160.33	192.738	23.3333	7.68838	26.3333	1.85592	AT3G47570.1	Leucine-rich repeat protein kinase family protein	LOC_Os11g41100.1	expressed protein
Sobic.007G080840	Suscepible vs Resistant	5 10 15	Higher in Susceptible	392	158.667	2.02759	170	29.5466	5	2.64575	8.33333	4.25572	193.333	23.3833	170.333	37.9576	2	2	4.66667	2.4037	145.333	8.95048	157.667	3.75648	0	0	0	0	AT4G36180.1	Leucine-rich receptor-like protein kinase family protein	LOC_Os10g03100.1	Cf2/Cf5 disease resistance protein, putative, expressed
Sobic.008G053000	Suscepible vs Resistant	5 10	Higher in Susceptible	198	142.667	11.348	101.667	13.0427	17.6667	2.66667	18.3333	2.96273	91.3333	25.4384	76	18.5203	23.6667	6.35959	27	2.64575	94.6667	11.7804	58.6667	14.8361	16	1	17	3.51188	AT3G47570.1	Leucine-rich repeat protein kinase family protein	LOC_Os11g46970.1	receptor-like protein kinase 5 precursor, putative, expressed
Sobic.008G108200	Suscepible vs Resistant	5 10 15	Higher in Susceptible	392	136.333	7.2188	121.667	2.72845	18	1	13.6667	0.881917	161.667	20.1025	129.333	22.6151	23.6667	2.72845	18	3	114	6.50641	103.333	31.1198	15.6667	1.76383	13.3333	7.05534	AT3G47570.1	Leucine-rich repeat protein kinase family protein	LOC_Os11g07230.1	receptor kinase, putative, expressed
Sobic.008G175032	Suscepible vs Resistant	5 10 15	Higher in Susceptible	392	146.333	9.17121	152.667	32.5696	30.6667	1.20185	21	1.52753	138	13.6504	202.333	12.9142	29.6667	5.33333	27.6667	8.08977	229	31	240.667	6.33333	29.3333	3.75648	17	3.60555	AT3G47570.1	Leucine-rich repeat protein kinase family protein	LOC_Os12g42520.1	receptor kinase, putative, expressed
Sobic.010G067200	Suscepible vs Resistant	5 10 15	Lower in Susceptible	289	30.3333	7.79601	26	2.08167	201.333	32.0017	238.667	19.8858	13.3333	3.4801	22.6667	4.97773	103	12.53	116.667	24.4563	17	0	8	1.1547	136	30.5014	85.6667	12.4677	AT2G24130.1	Leucine-rich receptor-like protein kinase family protein	LOC_Os06g08710.1	receptor-like protein kinase precursor, putative, expressed
Sobic.010G170500	Suscepible vs Resistant	5 10 15	Higher in Susceptible	392	38	2	52.6667	3.38296	0	0	6.66667	4.05518	65.3333	8.08977	63	12.7671	0	0	0	0	28.6667	2.72845	50	7.0946	0	0	1.66667	1.66667	AT5G45520.1	Leucine-rich repeat (LRR) family protein	LOC_Os11g42100.1	Leucine Rich Repeat family protein, expressed
Sobic.004G286250	Suscepible vs Resistant	10 15	Lower in Susceptible	170	0	0	0	0	11.3333	1.20185	19	4.3589	0	0	0	0	19.3333	5.17472	17.6667	1.76383	0	0	0	0	13.6667	0.333333	13.3333	1.76383	AT1G01220.1	L-fucokinase/GDP-L-fucose pyrophosphorylase	LOC_Os03g02410.1	GHMP kinases ATP-binding protein, putative, expressed
Sobic.008G096900	Suscepible vs Resistant	10	Higher in Susceptible	115	71	4.72582	88.6667	4.25572	27.3333	5.36449	17.6667	2.02759	93.3333	8.00694	92	5.1316	22	8.02081	25	1.52753	55	0.57735	55	9.29157	26	1.1547	13.6667	6.83943	AT2G18460.1	like COV 3	LOC_Os12g29750.1	protein of unknown function DUF502 domain containing protein, expressed
Sobic.005G118500	Suscepible vs Resistant	5 10 15	Higher in Susceptible	392	120	18.9033	128	20.502	27	2.88675	23	2.51661	113.333	4.91031	142	5.50757	25.3333	1.85592	26.3333	3.66667	95	13.2288	69.6667	6.76593	22.3333	5.23874	22.3333	1.20185	AT1G55280.1	Lipase/lipooxygenase, PLAT/LH2 family protein	LOC_Os11g29900.1	expressed protein
Sobic.003G385500	Suscepible vs Resistant	5 10	Higher in Susceptible	198	631.333	101.902	790.333	156.333	153.667	50.6798	1552	1357.33	836	199.502	3523.67	1350.85	163	31.7228	183	37.027	532	73.1049	4728.33	1282.19	115.667	21.458	161.333	35.8763	AT1G55020.1	lipoxygenase 1	LOC_Os03g52860.1	lipoxygenase, putative, expressed
Sobic.003G385900	Suscepible vs Resistant	5 10 15	Higher in Susceptible	392	1138.33	15.5063	920.333	240.573	67	13.1149	77	16.6533	1979.33	300.982	1004	380.991	58	10.3923	73.6667	14.5182	1402.67	60.0342	2425.67	1160.88	28.3333	0.333333	35.6667	1.76383	AT1G55020.1	lipoxygenase 1	LOC_Os03g52860.1	lipoxygenase, putative, expressed
Sobic.003G351300	Suscepible vs Resistant	5 10 15	Higher in Susceptible	392	23.3333	3.1798	31.6667	3.33333	2	2	4	2	36.6667	4.91031	37	5.50757	0	0	6	3.05505	26.3333	1.20185	33.6667	5.04425	4.33333	2.33333	1.66667	1.66667	AT5G23670.2	long chain base2	LOC_Os01g70380.1	serine palmitoyltransferase 2, putative, expressed
Sobic.001G272600	Suscepible vs Resistant	5	Higher in Susceptible	107	55.3333	3.1798	60.6667	4.33333	15.6667	3.71184	16.6667	0.881917	44	13.2288	51.6667	4.91031	26.3333	4.17665	25.3333	6.22718	71.3333	5.36449	74.6667	10.4775	31.3333	8.64741	26.6667	3.84419	AT3G14460.1	LRR and NB-ARC domains-containing disease resistance protein	LOC_Os10g04060.1	powdery mildew resistance protein PM3b, putative, expressed
Sobic.005G019400	Suscepible vs Resistant	5 10 15	Higher in Susceptible	392	56.6667	8.19214	92.3333	13.2204	17.6667	4.17665	12.3333	1.45297	58	15.8219	94.3333	21.6744	13.6667	2.18581	10.3333	2.60342	73.3333	11.2002	132.667	4.48454	9	2.08167	11.3333	2.18581	AT3G14460.1	LRR and NB-ARC domains-containing disease resistance protein	LOC_Os05g23990.1	rp3 protein, putative, expressed
Sobic.005G094001	Suscepible vs Resistant	10 15	Higher in Susceptible	200	749	48.2321	1003.33	21.3411	308	16.0104	364.667	58.766	1349	132.274	1655.33	48.0185	334	75.8441	478.333	91.7648	994.333	48.3195	1248.33	127.494	2509	261.764	2526	202.741	AT1G58602.1	LRR and NB-ARC domains-containing disease resistance protein	LOC_Os11g11940.1	MLA10, putative, expressed
Sobic.005G208000	Suscepible vs Resistant	5 10 15	Higher in Susceptible	392	81.6667	22.8206	107.333	18.0216	11.3333	1.20185	24.3333	2.60342	93	11.9304	177.333	11.6237	19	6.08276	19.6667	2.96273	73.6667	4.05518	108.333	19.6751	12	3.05505	14.6667	4.17665	AT1G58602.1	LRR and NB-ARC domains-containing disease resistance protein	LOC_Os08g07330.2	RGH1A, putative, expressed
Sobic.005G220200	Suscepible vs Resistant	5 10 15	Lower in Susceptible	289	30	15	28.6667	9.20748	1075	24.0278	1556.67	78.5585	17	12.3423	34.3333	7.51295	1747	304.107	1675.67	141.492	27	7.02377	10	2.88675	1692.33	199.995	1184.33	29.1567	AT3G14460.1	LRR and NB-ARC domains-containing disease resistance protein	LOC_Os11g10550.1	NBS-LRR disease resistance protein, putative, expressed
Sobic.007G188800	Suscepible vs Resistant	5	Higher in Susceptible	107	458.667	68.5428	487.333	62.3173	106.667	6.11919	122	6.80686	391.333	39.7674	595.333	25.6667	140	7.50555	109	7.50555	358	22.8108	408	18.0831	116	5.19615	98	6.65833	AT3G14460.1	LRR and NB-ARC domains-containing disease resistance protein	LOC_Os08g43000.1	CC-NBS-LRR, putative, expressed
Sobic.008G026200	Suscepible vs Resistant	5 10 15	Lower in Susceptible	289	433.667	74.7893	613	39.0512	1754	90.5888	2432	165.597	248	103.471	594.333	167.564	1936	182.215	3149.67	180.053	408.667	39.5573	435.667	58.2647	1394	54.9303	1265.33	226.401	AT3G14460.1	LRR and NB-ARC domains-containing disease resistance protein	LOC_Os02g16270.2	xa1, putative, expressed
Sobic.008G027200	Suscepible vs Resistant	10	Higher in Susceptible	115	10.6667	1.45297	14.3333	3.84419	28	12.49	28.6667	4.66667	48	29.6142	33.3333	11.2891	13.6667	2.18581	26	11.3725	21.6667	10.8064	40.6667	19.6751	25	5.68624	17.6667	2.18581	AT3G14460.1	LRR and NB-ARC domains-containing disease resistance protein	LOC_Os01g57340.1	rp1, putative, expressed
Sobic.008G027400	Suscepible vs Resistant	5	Higher in Susceptible	107	359.333	29.3844	432.667	43.8571	83	8	91.6667	13.1951	368.667	98.3537	472.333	92.708	132.667	36.7393	117.333	15.8149	323	14.7986	288	6.9282	101.667	8.56997	80	7.2111	AT3G14460.1	LRR and NB-ARC domains-containing disease resistance protein	LOC_Os01g57340.1	rp1, putative, expressed
Sobic.008G101100	Suscepible vs Resistant	5 10 15	Lower in Susceptible	289	9.66667	4.84195	9.66667	2.72845	52.6667	0.333333	57.3333	3.66667	2	2	5	2.64575	62.6667	6.33333	61.6667	2.848	1.66667	1.66667	5.66667	3.4801	80.6667	0.881917	74.3333	10.8679	AT3G14460.1	LRR and NB-ARC domains-containing disease resistance protein	LOC_Os03g63150.1	powdery mildew resistance protein PM3b, putative, expressed
Sobic.008G166400	Suscepible vs Resistant	10 15	Lower in Susceptible	170	1153.67	14.8586	1268.67	133.698	3632	406.198	3264.67	52.3365	913.667	287.272	1205	312.66	4046	485.816	4220.33	126.17	1047.33	72.3425	843.333	57.1732	3966.33	90.3352	3699.67	213.043	AT3G14460.1	LRR and NB-ARC domains-containing disease resistance protein	LOC_Os06g49380.4	NBS-LRR disease resistance protein, putative, expressed
Sobic.008G178200	Suscepible vs Resistant	5 10	Lower in Susceptible	161	62.3333	8.95048	66.6667	8.68588	717	26.6333	805	83.3727	55.6667	6.17342	37.3333	3.92994	746	51.9711	763	19.5192	63.6667	6.93622	38.3333	0.881917	814.667	14.8922	669.333	134.642	AT3G14460.1	LRR and NB-ARC domains-containing disease resistance protein	LOC_Os12g29710.1	NBS-LRR disease resistance protein, putative, expressed
Sobic.008G178600	Suscepible vs Resistant	5	Lower in Susceptible	131	22	2	21.6667	1.76383	61.6667	5.84047	71.6667	4.05518	26.3333	4.66667	25	2.51661	55	6.65833	75	5.85947	23.3333	1.45297	16	2.51661	99	13.6504	78	17.8979	AT3G14460.1	LRR and NB-ARC domains-containing disease resistance protein	LOC_Os12g29710.1	NBS-LRR disease resistance protein, putative, expressed
Sobic.009G221200	Suscepible vs Resistant	5 10	Higher in Susceptible	198	259.333	29.4637	397.333	25.3333	7.66667	1.33333	14.3333	3.4801	288	48.5077	437	20.5994	11	3.60555	12.6667	6.43774	405.667	50.6041	565.333	21.6205	5	5	6	1	AT3G14460.1	LRR and NB-ARC domains-containing disease resistance protein	LOC_Os04g53160.1	NBS-LRR disease resistance protein, putative, expressed
Sobic.001G004500	Suscepible vs Resistant	5 10 15	Higher in Susceptible	392	926	294.388	602.667	153.432	76	19.0088	38.6667	9.66667	1302	301.856	280.333	54.3824	41	6.65833	49.3333	4.97773	995.667	281.364	376.333	187.284	41	6.1101	36	5.56776	AT2G37210.2	lysine decarboxylase family protein	LOC_Os02g41770.1	uncharacterized protein PA4923, putative, expressed
Sobic.001G515500	Suscepible vs Resistant	5 10 15	Lower in Susceptible	289	108	12.1655	383.333	87.4554	521.667	5.81187	849.667	73.8835	173.667	89.2979	829.333	439.879	699	55.6447	919.333	111.837	99.6667	20.6989	191.333	16.1898	441	93.874	829	328.617	AT2G17120.1	lysm domain GPI-anchored protein 2 precursor	LOC_Os03g04110.1	lysM domain-containing GPI-anchored protein precursor, putative, expressed
Sobic.008G112100	Suscepible vs Resistant	5 10	Higher in Susceptible	198	126.333	18.4872	141.667	7.85988	17	1.1547	16	3.05505	107.333	18.9062	146.333	24.6667	10.3333	2.33333	10.3333	3.38296	125.667	11.4649	127	5.1316	7.66667	1.45297	7	3.60555	AT3G57650.1	lysophosphatidyl acyltransferase 2	LOC_Os11g41900.1	acyltransferase, putative, expressed
Sobic.006G130501	Suscepible vs Resistant	5	Higher in Susceptible	107	279.333	49.5625	418.333	85.3411	75.6667	3.84419	88.6667	10.6823	151.333	33.3533	494.667	93.8622	59.6667	5.48736	95.3333	12.3333	343.333	25.1816	1.96717e+07	1.96707e+07	93.3333	1.45297	86.3333	6.00925	AT1G59740.1	Major facilitator superfamily protein	LOC_Os04g41400.1	peptide transporter PTR2, putative, expressed
Sobic.001G136300	Suscepible vs Resistant	10	Higher in Susceptible	115	192.667	31.1198	179.667	20.2841	89.3333	30.0241	83.3333	5.4569	370.333	63.98	228.667	64.0529	87	16.0935	52.6667	15.592	246.333	24.127	173.333	26.5853	56	10.0167	90.3333	19.2036	AT2G39210.1	Major facilitator superfamily protein	LOC_Os03g47810.1	nodulin family protein, putative, expressed
Sobic.006G003700	Suscepible vs Resistant	10 15	Higher in Susceptible	200	28	1	40.6667	5.36449	13.6667	9.52774	6	3.4641	52.6667	5.84047	68.3333	19.5477	19	5.1316	10.6667	6.06447	91.6667	10.105	105.667	40.5969	24.6667	9.27961	25	5.03322	AT1G18000.1	Major facilitator superfamily protein	LOC_Os04g01520.1	expressed protein
Sobic.008G097300	Suscepible vs Resistant	10 15	Higher in Susceptible	200	62.6667	1.20185	93.6667	13.1951	43.6667	11.6237	55.3333	6.35959	126.333	32.9865	92	4.58258	39	5.1316	34.6667	6.69162	70	2.88675	88	15.1767	40.6667	4.70225	60.3333	10.4775	AT2G28120.1	Major facilitator superfamily protein	LOC_Os12g29950.2	nodulin, putative, expressed
Sobic.009G136500	Suscepible vs Resistant	10 15	Higher in Susceptible	200	34.3333	7.68838	30.3333	9.24362	11	5.50757	8.33333	0.333333	84	19.1572	37	26.5141	9	4.72582	9.66667	2.72845	7.66667	0.333333	8.66667	1.76383	2	2	0	0	AT1G68570.1	Major facilitator superfamily protein	LOC_Os05g33960.1	peptide transporter PTR2, putative, expressed
Sobic.006G102300	Suscepible vs Resistant	5 10 15	Higher in Susceptible	392	35.6667	2.18581	24.3333	3.38296	2	2	4.66667	2.4037	46.3333	8.21246	36	8.5049	3	3	10.6667	2.96273	26.3333	1.20185	26.6667	6.56591	8.33333	0.881917	5.66667	3.4801	AT1G34580.1	Major facilitator superfamily protein	LOC_Os04g38010.1	transporter family protein, putative, expressed
Sobic.008G180300	Suscepible vs Resistant	5 10 15	Higher in Susceptible	392	72	9.84886	54.6667	7.83865	17	0	10	3.05505	122	35.8376	63.6667	26.6729	7.66667	1.66667	11.3333	1.85592	35.3333	4.97773	31	10.0664	5.33333	2.90593	3.33333	1.66667	AT5G62680.1	Major facilitator superfamily protein	LOC_Os12g44110.2	ligA, putative, expressed
Sobic.009G101800	Suscepible vs Resistant	5 10 15	Higher in Susceptible	392	1234.67	118.695	1499.67	122.121	73.6667	22.4227	85.6667	17.7044	1509.33	116.711	1410.67	142.502	58	8.32666	68.3333	25.3136	936.667	14.8922	957.333	89.1634	70.3333	8.64741	92	11.5036	AT2G40460.1	Major facilitator superfamily protein	LOC_Os05g27010.1	peptide transporter PTR3-A, putative, expressed
Sobic.003G371000	Suscepible vs Resistant	5	Lower in Susceptible	131	229.333	33.7853	1172	500.83	3358.67	1755.13	2134.67	1073.86	2357	969.873	1456	563.877	6845.33	374.781	2060	1208.11	469	143.949	282.667	59.3024	1357.33	611.12	556.667	323.671	AT1G22540.1	Major facilitator superfamily protein	LOC_Os01g65100.1	peptide transporter, putative, expressed
Sobic.003G371100	Suscepible vs Resistant	5	Lower in Susceptible	131	39.3333	9.33333	152.667	68.1673	1780.67	1302.88	696.333	351.264	975.333	843.405	194	125.108	4445.67	2225.55	838.667	593.393	126.667	89.3427	35.3333	17.9753	689.667	579.287	161	145.507	AT1G22540.1	Major facilitator superfamily protein	LOC_Os01g65110.1	POT family protein, expressed
Sobic.005G037300	Suscepible vs Resistant	5	Lower in Susceptible	131	252.333	67.9371	1142	602.263	3603	2221.5	2339	1278.88	3817.67	2110.35	2830.67	1252.81	10862	1814.8	3156.33	1350.05	620.333	173.724	359.333	94.969	1839	748.487	778.667	445.356	AT2G16980.2	Major facilitator superfamily protein	LOC_Os11g05390.1	transporter, major facilitator family, putative, expressed
Sobic.005G171200	Suscepible vs Resistant	5 10	Lower in Susceptible	161	5.66667	3.1798	9.66667	2.02759	39.6667	8.87568	42	3.21455	2.33333	2.33333	14.3333	1.76383	44	11.6762	33	8.62168	16.6667	1.85592	37.6667	12.3333	53.3333	9.49269	105	19.6554	AT5G61520.1	Major facilitator superfamily protein	LOC_Os11g38160.1	transporter family protein, putative, expressed
Sobic.002G337100	Suscepible vs Resistant	10 15	Lower in Susceptible	170	26.6667	5.23874	13	4.04145	53.3333	0.333333	66.6667	2.4037	8.33333	5.60753	12.3333	2.90593	42	14	54.6667	2.96273	19.6667	4.05518	13.6667	3.1798	61	3.60555	50.3333	2.33333	AT4G05120.1	Major facilitator superfamily protein	LOC_Os07g37110.1	nucleoside transporter, putative, expressed
Sobic.010G028950	Suscepible vs Resistant	5 10	Lower in Susceptible	161	4	2	0	0	48.3333	20.3005	41.3333	3.84419	4.66667	4.66667	2	2	51	9.53939	47	1.1547	3.33333	1.66667	0	0	50.6667	3.75648	48.6667	8.83805	AT3G51550.1	Malectin/receptor-like protein kinase family protein	LOC_Os11g35290.1	OsWAK119 - OsWAK receptor-like cytoplasmic kinase OsWAK-RLCK, expressed
Sobic.005G017700	Suscepible vs Resistant	10	Lower in Susceptible	95	0	0	2	2	3.66667	1.85592	11	3.60555	0	0	2	2	17	6.1101	9	1.52753	0	0	0	0	8.33333	1.66667	16.3333	4.66667	AT1G19715.1	Mannose-binding lectin superfamily protein	LOC_Os04g03360.1	jacalin-like lectin domain containing protein, expressed
Sobic.010G185000	Suscepible vs Resistant	10 15	Higher in Susceptible	200	7	1	9.33333	0.881917	2.66667	2.66667	6.33333	3.1798	8.66667	8.66667	30.3333	3.84419	0	0	6.66667	0.666667	5.66667	2.96273	47	27.3922	9.33333	0.666667	3.33333	1.66667	AT3G18690.1	MAP kinase substrate 1	LOC_Os06g40090.1	VQ domain containing protein, putative, expressed
Sobic.001G273000	Suscepible vs Resistant	5 10	Higher in Susceptible	198	239.333	16.1692	207.333	19.0117	9	2.3094	9	4.50925	125.333	40.3416	142	33.5609	7.33333	3.84419	8.33333	4.17665	180	3.4641	111.667	1.45297	0	0	0	0	AT1G47530.1	MATE efflux family protein	LOC_Os10g11860.1	MATE efflux family protein, putative, expressed
Sobic.001G454900	Suscepible vs Resistant	5 10 15	Higher in Susceptible	392	149.333	23.0241	136	13.2035	37.6667	7.68838	29.3333	7.68838	165	23.1157	205	12.2202	36.6667	2.02759	20	1.52753	120.667	11.1405	98	8.32666	26.6667	3.71184	30	2.08167	AT1G51340.2	MATE efflux family protein	LOC_Os03g11734.2	MATE efflux protein, putative, expressed
Sobic.009G106960	Suscepible vs Resistant	10 15	Lower in Susceptible	170	15	3.78594	7.33333	3.84419	22.3333	3.1798	24	3.4641	2.33333	2.33333	2	2	18.3333	1.45297	14.3333	2.66667	7	2	0	0	22.3333	2.18581	18.6667	1.33333	AT5G52450.1	MATE efflux family protein	LOC_Os10g20470.1	MATE efflux family protein, putative, expressed
Sobic.001G185400	Suscepible vs Resistant	5 10 15	Lower in Susceptible	289	34.3333	3.1798	36.3333	3.66667	373.333	45.3738	277.667	7.88106	33.3333	3.4801	26	2.08167	367.333	78.531	267.333	68.8485	26.6667	4.05518	14.3333	1.45297	170.333	19.6158	163.667	45.4325	AT3G21690.1	MATE efflux family protein	LOC_Os03g37640.1	MATE efflux family protein, putative, expressed
Sobic.001G283000	Suscepible vs Resistant	10 15	Lower in Susceptible	170	67.6667	12.7323	50	11.5326	158.667	10.2686	139.333	5.36449	27	2.51661	27.3333	2.96273	145	6.65833	137.667	27.7389	46.3333	5.66667	26.6667	6.69162	113.667	22.1836	107.667	8.74325	AT1G32080.1	membrane protein, putative	LOC_Os10g42780.1	lrgB-like family protein, expressed
Sobic.001G383100	Suscepible vs Resistant	5 10	Lower in Susceptible	161	161.333	7.9652	176.667	8.83805	697.333	45.2855	688	84.5715	132.333	25.0355	139	33.6056	700.333	48.4195	648.667	13.7396	262.667	7.26483	255.667	26.015	637	23.8607	624.333	25.3925	AT3G10850.1	Metallo-hydrolase/oxidoreductase superfamily protein	LOC_Os03g21460.1	metallo-beta-lactamase family protein, putative, expressed
Sobic.003G321000	Suscepible vs Resistant	10 15	Higher in Susceptible	200	22	2.51661	28.3333	2.96273	17.3333	4.25572	15	3.21455	30.3333	6.56591	31	7	12	2.08167	13.6667	2.18581	23	2.64575	32	6.02771	10.6667	1.76383	13.3333	2.848	AT2G23620.1	methyl esterase 1	LOC_Os01g57770.1	OsPOP4 - Putative Prolyl Oligopeptidase homologue, expressed
Sobic.009G132400	Suscepible vs Resistant	10 15	Higher in Susceptible	200	14.6667	1.85592	13.6667	2.96273	0	0	0	0	15.3333	2.02759	8.66667	0.881917	0	0	0	0	24.6667	2.848	16	4.93288	0	0	0	0	AT5G51600.1	Microtubule associated protein (MAP65/ASE1) family protein	LOC_Os01g49200.1	microtubule associated protein, putative, expressed
Sobic.004G024800	Suscepible vs Resistant	10 15	Lower in Susceptible	170	5	2.64575	2.66667	2.66667	17.3333	2.848	16.6667	8.41295	2.33333	2.33333	4.66667	2.4037	19	7	20.6667	2.90593	7.66667	0.333333	0	0	16.3333	2.4037	15.3333	4.66667	AT5G51600.1	Microtubule associated protein (MAP65/ASE1) family protein	LOC_Os02g03400.1	microtubule associated protein, putative, expressed
Sobic.006G087500	Suscepible vs Resistant	10 15	Lower in Susceptible	170	12.3333	6.33333	0	0	15.3333	9.33333	15	4.04145	4.33333	2.18581	4.33333	2.18581	24.6667	2.33333	21.3333	5.78312	9.33333	2.33333	8.66667	3.1798	23.6667	8.08977	19.3333	0.666667	AT5G46280.1	Minichromosome maintenance (MCM2/3/5) family protein	LOC_Os05g39850.1	MCM3 - Putative minichromosome maintenance MCM complex subunit 3, expressed
Sobic.001G396900	Suscepible vs Resistant	5 10	Lower in Susceptible	161	4	2	13.3333	2.90593	28.3333	3.92994	28	3.78594	5.66667	2.96273	6	3.05505	24.6667	6.17342	21.6667	1.85592	5	2.51661	2	2	20	2	22	2	AT4G16160.2	Mitochondrial import inner membrane translocase subunit Tim17/Tim22/Tim23 family protein	LOC_Os03g19290.1	mitochondrial import inner membrane translocase subunit Tim17, putative, expressed
Sobic.006G183301	Suscepible vs Resistant	5 10	Higher in Susceptible	198	50.3333	3.84419	48	5.2915	17	5.50757	15.3333	4.37163	49	7.76745	45.6667	2.96273	11	2	16.6667	2.18581	56	1.1547	35.3333	8.00694	15.3333	1.33333	17	1.52753	AT1G21150.1	Mitochondrial transcription termination factor family protein	LOC_Os11g10000.1	mTERF family protein, expressed
Sobic.005G094332	Suscepible vs Resistant	5 10 15	Lower in Susceptible	289	3	3	2	2	47	4.3589	54.3333	3.4801	2	2	2.66667	2.66667	55.6667	7.51295	67.6667	15.6773	0	0	0	0	65.3333	3.38296	98.3333	8.56997	AT1G51660.1	mitogen-activated protein kinase kinase 4	LOC_Os06g09180.1	OsMKK5 - putative MAPKK based on amino acid sequence homology, expressed
Sobic.009G217500	Suscepible vs Resistant	5	Lower in Susceptible	131	12.6667	2.60342	106.333	77.2881	83	30.0888	13	6.80686	12.6667	4.40959	158.667	122.831	13.3333	1.20185	8.66667	2.02759	29.3333	6.33333	58	23.3524	64.6667	41.9894	21.3333	6.38575	AT5G55090.1	mitogen-activated protein kinase kinase kinase 15	LOC_Os05g46750.1	STE_MEKK_ste11_MAP3K.18 - STE kinases include homologs to sterile 7, sterile 11 and sterile 20 from yeast, expressed
Sobic.003G268900	Suscepible vs Resistant	5	Lower in Susceptible	131	12	3.78594	94.6667	46.9657	43.6667	9.95546	18	1	18.6667	3.75648	132.667	99.288	14.3333	2.72845	8.33333	4.25572	23	7.63763	90.6667	31.2001	48.6667	15.9199	25.3333	4.33333	AT4G26890.1	mitogen-activated protein kinase kinase kinase 16	LOC_Os01g50410.1	STE_MEKK_ste11_MAP3K.6 - STE kinases include homologs to sterile 7, sterile 11 and sterile 20 from yeast, expressed
Sobic.002G064750	Suscepible vs Resistant	5 10 15	Higher in Susceptible	392	145.333	12.2384	125.667	16.1898	4.66667	2.60342	7	3.51188	84.3333	18.0216	98.6667	14.4376	4	2	5.66667	3.1798	119.667	12.1152	78.3333	5.92546	5.33333	0.333333	0	0	AT1G53570.1	mitogen-activated protein kinase kinase kinase 3
Sobic.004G235801	Suscepible vs Resistant	10 15	Lower in Susceptible	170	38	10.6927	36.6667	8.68588	97	29.1376	118	12.5831	21.6667	9.20748	35	11.2398	80.6667	30.6014	108.667	49.1878	24	1.73205	22.6667	5.60753	66	17.3494	48.3333	14.4376	AT5G47540.1	Mo25 family protein	LOC_Os03g07600.1	calcium-binding protein, putative, expressed
Sobic.010G088600	Suscepible vs Resistant	5 10	Lower in Susceptible	161	165.333	2.72845	213.333	6.88799	662.667	41.1515	609.667	20.7953	176.667	38.8344	235.333	33.8936	658.333	29.2935	626.667	45.6119	177	3.05505	297.333	52.4479	629	24.0278	678	23.4307	AT5G08290.1	mRNA splicing factor, thioredoxin-like U5 snRNP	LOC_Os07g10256.1	mitosis protein dim1, putative, expressed
Sobic.010G093800	Suscepible vs Resistant	5 10	Higher in Susceptible	198	160	4.04145	140	9.53939	3.66667	1.85592	6.66667	4.05518	79.6667	18.5502	125.333	29.3561	4	2	3.66667	1.85592	149.667	4.37163	111.333	8.81917	0	0	1.66667	1.66667	AT1G30420.1	multidrug resistance-associated protein 12	LOC_Os04g52900.2	ABC transporter family protein, putative, expressed
Sobic.006G021900	Suscepible vs Resistant	5	Lower in Susceptible	131	76.3333	24.7678	335	88.5965	314.333	94.7494	243.667	36.9519	194	103.812	685.667	223.692	238	38.6825	260.667	62.8817	179.333	56.8927	652.667	47.7226	215.667	30.8995	522.667	135.376	AT2G47800.1	multidrug resistance-associated protein 4	LOC_Os04g13220.1	ABC transporter family protein, putative, expressed
Sobic.004G123200	Suscepible vs Resistant	10 15	Lower in Susceptible	170	14	1.73205	4.66667	2.4037	13	1.1547	17.3333	1.45297	2.33333	2.33333	5	5	17	4	20	1.52753	8.66667	5.20683	11.3333	5.696	22.3333	4.63081	23	2.08167	AT5G11510.1	myb domain protein 3r-4	LOC_Os12g13570.1	MYB family transcription factor, putative, expressed
Sobic.005G224700	Suscepible vs Resistant	5 10 15	Higher in Susceptible	392	801.333	96.8062	700.667	49.0793	37008.7	36917.2	85	3.78594	942.667	151.235	606.667	108.352	144.667	18.6667	120.333	15.857	658	6.55744	441	115.846	62	7.63763	53	9.07377	AT3G46130.3	myb domain protein 48	LOC_Os11g47460.2	MYB family transcription factor, putative, expressed
Sobic.003G119900	Suscepible vs Resistant	10 15	Lower in Susceptible	170	138	11.5902	94.3333	7.68838	320.333	101.088	236.667	73.739	119	10.2144	77.6667	7.9652	554.333	306.28	225.333	34.3527	149.667	22.1836	114	3.21455	259.333	47.9595	223.333	16.8259	AT4G39120.1	myo-inositol monophosphatase like 2	LOC_Os07g09330.1	inositol-1-monophosphatase, putative, expressed
Sobic.001G326100	Suscepible vs Resistant	5 10 15	Higher in Susceptible	392	254.667	25.0754	361	15.5349	27.6667	8.68588	29.6667	3.52767	194	49.339	385.333	110.333	27.6667	2.90593	25	3.21455	228	11.3725	305.333	61.7909	24	4.16333	28.3333	1.20185	AT2G14680.1	myosin heavy chain-related	LOC_Os03g31730.1	expressed protein
Sobic.006G019100	Suscepible vs Resistant	5 10 15	Higher in Susceptible	392	422.667	40.1926	393.333	37.9576	46.3333	0.881917	80	12.0968	465.333	30.9318	455	93.3113	57.6667	3.84419	71.3333	4.70225	360.667	22.3408	445	71.6543	59.3333	3.84419	63.3333	1.20185	AT1G32010.1	myosin heavy chain-related	LOC_Os06g06950.1	expressed protein
Sobic.009G142200	Suscepible vs Resistant	5 10 15	Lower in Susceptible	289	6.66667	3.38296	28.6667	6.35959	114	57.492	41	9.0185	9.66667	3.1798	167.667	58.9133	241.333	84.7375	36.6667	8.83805	32.3333	19.4108	309.667	259.552	38.3333	10.5883	31.3333	3.71184	AT1G01720.1	NAC (No Apical Meristem) domain transcriptional regulator superfamily protein	LOC_Os05g34830.1	No apical meristem protein, putative, expressed
Sobic.006G107400	Suscepible vs Resistant	10 15	Higher in Susceptible	200	79	10.2632	98.6667	17.6761	45	2.08167	50	6.1101	88.6667	19.5391	157.333	41.9139	31	5.56776	36.6667	2.33333	51.6667	9.59745	128	30.3535	26.3333	1.66667	28.3333	1.66667	AT5G61430.1	NAC domain containing protein 100	LOC_Os04g38720.1	no apical meristem protein, putative, expressed
Sobic.002G080100	Suscepible vs Resistant	5	Lower in Susceptible	131	201	78.5133	942	355.476	963.333	146.23	808.333	118.668	311.667	88.0536	744.667	408.408	424	88.1608	264	29.6873	262.333	25.0754	687.667	125.255	528	177.094	488.667	52.2632	AT5G63790.1	NAC domain containing protein 102	LOC_Os07g12340.1	NAC domain-containing protein 67, putative, expressed
Sobic.002G342100	Suscepible vs Resistant	10	Lower in Susceptible	95	0	0	0	0	4	4	9.66667	1.66667	2.33333	2.33333	2.33333	2.33333	16.3333	4.84195	13	0.57735	9.33333	1.85592	2.66667	2.66667	8.66667	1.85592	3.33333	1.66667	AT1G61110.1	NAC domain containing protein 25	LOC_Os07g37920.1	no apical meristem protein, putative, expressed
Sobic.001G515800	Suscepible vs Resistant	5	Lower in Susceptible	131	13.6667	3.4801	61.6667	13.2958	43.3333	4.40959	35.3333	10.651	36.6667	13.2455	77.3333	38.7485	52	6.55744	37	1.73205	25.3333	4.97773	73.3333	9.59745	27.3333	4.05518	37	10.2632	AT2G17040.1	NAC domain containing protein 36	LOC_Os03g04070.1	no apical meristem protein, putative, expressed
Sobic.005G018500	Suscepible vs Resistant	5	Higher in Susceptible	107	135	38.9401	718.667	73.3424	41.6667	1.20185	150	65.1178	322.333	112.452	2313	444.572	106.333	30.1128	112	15.3731	212.333	78.3418	3684	2452.93	76	33.7095	73	4.50925	AT1G69490.1	NAC-like, activated by AP3/PI	LOC_Os11g03300.1	NAC domain transcription factor, putative, expressed
Sobic.002G366100	Suscepible vs Resistant	10	Higher in Susceptible	115	1234.33	159.412	1875.33	118.679	441.667	89.0437	626.667	127.261	873.333	8.76229	1664	211.126	225	70.6847	435.333	124.816	2156.67	55.0464	4044.33	980.624	704.667	56.0664	1435.33	94.8092	AT4G27250.1	NAD(P)-binding Rossmann-fold superfamily protein	LOC_Os07g40986.1	NAD dependent epimerase/dehydratase family protein, putative, expressed
Sobic.005G202600	Suscepible vs Resistant	10	Higher in Susceptible	115	11.3333	1.45297	6.66667	0.666667	0	0	0	0	23.3333	5.89727	5.66667	2.848	0	0	0	0	12	1	3.33333	3.33333	0	0	1.66667	1.66667	AT1G07450.1	NAD(P)-binding Rossmann-fold superfamily protein	LOC_Os11g25160.2	tropinone reductase 2, putative, expressed
Sobic.006G227000	Suscepible vs Resistant	10	Higher in Susceptible	115	232.667	115.657	110.667	53.0702	113	80.0521	22	7.2111	298	60.6987	20	10.0167	29	8.73689	25	7.02377	223	18.5023	20	5.85947	14.6667	4.91031	12.6667	2.18581	AT1G61720.1	NAD(P)-binding Rossmann-fold superfamily protein	LOC_Os04g53920.1	leucoanthocyanidin reductase, putative, expressed
Sobic.001G307300	Suscepible vs Resistant	5 10	Higher in Susceptible	198	34.3333	2.02759	23.6667	4.48454	2	2	2	2	32.6667	3.1798	15.3333	1.85592	2	2	1.66667	1.66667	45	4.3589	14	4.58258	0	0	1.66667	1.66667	AT4G11410.1	NAD(P)-binding Rossmann-fold superfamily protein	LOC_Os10g40030.2	short chain dehydrogenase/reductase protein, putative, expressed
Sobic.001G231400	Suscepible vs Resistant	10 15	Higher in Susceptible	200	49.6667	15.1914	66.6667	16.1898	63.3333	22.8059	30.3333	2.02759	87.3333	10.5251	75.6667	4.91031	29.3333	2.4037	37	6.50641	70.6667	9.73539	116	18.61	41.3333	8.68588	89.6667	12.8366	AT4G13180.1	NAD(P)-binding Rossmann-fold superfamily protein	LOC_Os10g31780.1	oxidoreductase, short chain dehydrogenase/reductase family domain containing protein, expressed
Sobic.001G307600	Suscepible vs Resistant	10	Lower in Susceptible	95	28.3333	8.41295	16.6667	3.1798	51.3333	5.17472	39	9.2376	10.3333	2.02759	14.6667	1.20185	43	3.60555	52.6667	9.02466	23.3333	2.848	20	6.50641	45.6667	1.85592	44	4.3589	AT4G11410.1	NAD(P)-binding Rossmann-fold superfamily protein	LOC_Os10g40020.2	oxidoreductase, short chain dehydrogenase/reductase family domain containing family, expressed
Sobic.005G203000	Suscepible vs Resistant	5 10	Lower in Susceptible	161	0	0	0	0	17.6667	4.25572	15.3333	4.97773	0	0	0	0	18.3333	4.91031	20.3333	6.33333	0	0	0	0	9.66667	1.85592	3.33333	1.66667	AT2G29150.1	NAD(P)-binding Rossmann-fold superfamily protein	LOC_Os11g43360.1	tropinone reductase 2, putative, expressed
Sobic.005G203300	Suscepible vs Resistant	5 10	Lower in Susceptible	161	23	0.57735	46.3333	4.40959	116.333	26.308	84	4.93288	13	3	38.3333	9.40449	69.6667	7.68838	84.3333	9.9387	34.6667	5.4569	36.6667	20.2841	83.6667	10.1708	66	6.50641	AT2G29360.1	NAD(P)-binding Rossmann-fold superfamily protein	LOC_Os11g43360.1	tropinone reductase 2, putative, expressed
Sobic.006G226400	Suscepible vs Resistant	5 10	Lower in Susceptible	161	13.3333	3.66667	14.6667	1.20185	40.6667	1.45297	88	43.6157	6.33333	3.4801	34.6667	8.74325	50.6667	8.96908	48.3333	11.8369	14.3333	2.60342	42.3333	28.4273	32.6667	5.54777	53.3333	2.66667	AT1G61720.1	NAD(P)-binding Rossmann-fold superfamily protein	LOC_Os04g53850.1	leucoanthocyanidin reductase, putative, expressed
Sobic.006G096200	Suscepible vs Resistant	10 15	Higher in Susceptible	200	15.3333	1.20185	12	3.05505	0	0	0	0	25	3.05505	17	4.16333	0	0	0	0	17.6667	1.20185	18.6667	4.8074	0	0	1.66667	1.66667	AT1G59960.1	NAD(P)-linked oxidoreductase superfamily protein	LOC_Os04g37470.1	oxidoreductase, aldo/keto reductase family protein, putative, expressed
Sobic.004G209300	Suscepible vs Resistant	5 10 15	Lower in Susceptible	289	23	2	21	2.08167	216	21.1975	211.333	18.2605	11	2.08167	16	3.05505	182	31.9427	182	4.04145	12	2.64575	8.66667	0.666667	154.667	21.7281	138	15.2753	AT5G53460.3	NADH-dependent glutamate synthase 1	LOC_Os01g48960.1	glutamate synthase, chloroplast precursor, putative, expressed
Sobic.003G429300	Suscepible vs Resistant	10 15	Higher in Susceptible	200	10.6667	0.333333	32.3333	3.52767	16.3333	3.84419	15	3.21455	24	1.73205	40.3333	2.4037	7.33333	3.84419	16.6667	5.20683	18.3333	1.20185	62.6667	21.3255	6.66667	3.33333	16	5.1316	AT3G27890.1	NADPH:quinone oxidoreductase	LOC_Os01g72460.1	NADPH quinone oxidoreductase, putative, expressed
Sobic.005G154850	Suscepible vs Resistant	5 10 15	Lower in Susceptible	289	33.3333	1.20185	33.3333	12.252	220.667	18.2605	216	26.1024	18.3333	7.31057	25.3333	6.22718	171	27.0986	195	11.7898	33.6667	1.20185	19.6667	4.91031	153.333	17.901	142.333	5.84047	AT5G11670.1	NADP-malic enzyme 2	LOC_Os01g52500.4	NADP-dependent malic enzyme, putative, expressed
Sobic.003G280900	Suscepible vs Resistant	5 10 15	Higher in Susceptible	392	5135	515.923	8401.67	252.712	1262	155.087	1665.33	73.687	5981.67	550.49	9857.67	717.304	1294	259.405	1824.67	209.896	6162	147.564	8633.67	475.975	2011.67	377.368	2736	349.159	AT5G25880.1	NADP-malic enzyme 3	LOC_Os01g52500.3	NADP-dependent malic enzyme, putative, expressed
Sobic.001G182700	Suscepible vs Resistant	5 10	Lower in Susceptible	161	10	1.52753	9	4.50925	108.333	7.88106	101.667	17.1691	10.3333	0.333333	11	2.08167	98.6667	11.392	111	4.16333	13.3333	0.881917	13.3333	6.88799	113	3	94	6.245	AT3G14470.1	NB-ARC domain-containing disease resistance protein	LOC_Os03g38330.1	disease resistance RPP13-like protein 1, putative, expressed
Sobic.001G459600	Suscepible vs Resistant	5 10 15	Lower in Susceptible	289	10.6667	3.28295	23	8.0829	380.333	23.2116	397	33.4863	7	4.04145	15	1.1547	445.667	26.8225	395	20.2237	11.3333	3.1798	8.66667	1.85592	367	32.3316	344	7.23418	AT3G14470.1	NB-ARC domain-containing disease resistance protein	LOC_Os05g45690.1	expressed protein
Sobic.002G050600	Suscepible vs Resistant	5 10 15	Higher in Susceptible	392	57	3.78594	65	9.53939	0	0	6.66667	4.05518	60	6.65833	62.6667	2.96273	0	0	2	2	62	4.04145	88	17.9536	0	0	0	0	AT3G07040.1	NB-ARC domain-containing disease resistance protein	LOC_Os10g41900.1	mla1, putative, expressed
Sobic.002G071850	Suscepible vs Resistant	5	Higher in Susceptible	107	142.333	23.2546	71.3333	8.08977	38.3333	3.92994	50	6.4291	101	7.54983	34.3333	0.881917	44.6667	7.68838	54.3333	3.84419	186	13.5769	88	38.553	58	4.93288	65.6667	12.3468	AT3G07040.1	NB-ARC domain-containing disease resistance protein	LOC_Os08g42670.1	resistance protein, putative, expressed
Sobic.002G240500	Suscepible vs Resistant	5 10	Lower in Susceptible	161	6.66667	0.666667	3.33333	3.33333	28	1	27	3.4641	6.66667	3.33333	2.66667	2.66667	26	1	35.3333	2.33333	4.33333	4.33333	6.33333	3.28295	39.3333	0.881917	33.6667	1.66667	AT3G07040.1	NB-ARC domain-containing disease resistance protein	LOC_Os09g30220.1	disease resistance protein RPM1, putative, expressed
Sobic.002G321100	Suscepible vs Resistant	5 10 15	Higher in Susceptible	392	437	53.0126	556.333	47.3369	15.6667	7.05534	15.6667	5.23874	464.667	45.6995	834.333	152.879	8	4.04145	10.6667	6.06447	538.333	15.3225	829.333	142.684	1.66667	1.66667	1.66667	1.66667	AT3G14470.1	NB-ARC domain-containing disease resistance protein	LOC_Os07g33730.2	NB-ARC domain containing protein, expressed
Sobic.002G321200	Suscepible vs Resistant	5 10	Higher in Susceptible	198	102.333	3.84419	144.667	2.33333	6	3.78594	4	2	169.333	25.7833	220	33.0454	6.33333	3.75648	6	3.4641	159.333	10.8064	277	28.7286	1.66667	1.66667	0	0	AT3G14470.1	NB-ARC domain-containing disease resistance protein	LOC_Os07g33740.1	vrga1, putative, expressed
Sobic.002G393800	Suscepible vs Resistant	5 10 15	Lower in Susceptible	289	11	8.18535	22	7.23418	410.333	70.5912	400.333	15.857	8.66667	8.66667	17	5.2915	476.667	81.6748	496	57.7437	10.3333	1.20185	10.3333	2.18581	506.667	43.5137	732.667	58.7717	AT3G07040.1	NB-ARC domain-containing disease resistance protein	LOC_Os12g37740.1	resistance protein LR10, putative, expressed
Sobic.002G393900	Suscepible vs Resistant	5 10	Lower in Susceptible	161	15	5.03322	28.3333	10.105	707.333	162.481	644	75.4807	11.3333	4.33333	22.6667	6.33333	870	154	913.667	13.8604	16.6667	2.02759	7	1.52753	887	60.3517	1337.33	100.989	AT3G46730.1	NB-ARC domain-containing disease resistance protein	LOC_Os08g14830.1	NB-ARC domain containing protein, expressed
Sobic.004G014600	Suscepible vs Resistant	10	Higher in Susceptible	115	12	3.21455	14	5.50757	0	0	0	0	15	5.50757	14	3.78594	0	0	0	0	11.3333	1.33333	24	3.78594	0	0	1.66667	1.66667	AT3G14470.1	NB-ARC domain-containing disease resistance protein	LOC_Os02g18000.1	disease resistance protein RGA2, putative, expressed
Sobic.005G047700	Suscepible vs Resistant	5 10 15	Lower in Susceptible	289	34	10.116	42	13.6504	1366.33	109.109	1418.67	80.6481	29.6667	21.7281	32.6667	9.52774	1620.67	213.528	2064	86.9617	30.6667	2.66667	21.3333	6.17342	2347.67	68.5476	2266	137.153	AT3G07040.1	NB-ARC domain-containing disease resistance protein	LOC_Os06g17880.1	NBS-LRR disease resistance protein, putative, expressed
Sobic.005G047800	Suscepible vs Resistant	5 10 15	Lower in Susceptible	289	12.6667	3.75648	8.66667	1.76383	170.333	2.72845	164.667	7.83865	5.66667	2.96273	4	2	203.667	22.1008	189.333	6.35959	4.33333	4.33333	2	2	212.333	13.9084	171	1	AT3G07040.1	NB-ARC domain-containing disease resistance protein	LOC_Os06g17880.1	NBS-LRR disease resistance protein, putative, expressed
Sobic.005G048400	Suscepible vs Resistant	5 10	Lower in Susceptible	161	15	1.1547	13.3333	3.1798	117	8.0829	137	10.4403	16	8.7178	7.66667	4.09607	144.333	15.0591	183.667	11.5662	18	2.51661	3.33333	3.33333	196.333	16.7564	178	5.68624	AT3G46730.1	NB-ARC domain-containing disease resistance protein	LOC_Os06g17880.1	NBS-LRR disease resistance protein, putative, expressed
Sobic.005G053100	Suscepible vs Resistant	5 10	Lower in Susceptible	161	53.3333	3.92994	64	4.04145	397	43.062	526	32.9242	52	5.1316	74	21	395	48.8501	522.667	39.4729	41	3.21455	56	10.5987	461	30.6649	511.667	2.02759	AT3G14470.1	NB-ARC domain-containing disease resistance protein	LOC_Os11g47780.1	pollen signalling protein with adenylyl cyclase activity, putative, expressed
Sobic.005G053200	Suscepible vs Resistant	5 10 15	Higher in Susceptible	392	1038.67	2.90593	1730.33	198.828	181	14.8436	249.333	17.1691	1240	372.79	2065	474.394	181.333	30.3333	233.333	21.0581	975.667	55.0162	1578.33	504.903	204.667	15.1694	233.333	26.3902	AT3G14470.1	NB-ARC domain-containing disease resistance protein	LOC_Os11g47780.1	pollen signalling protein with adenylyl cyclase activity, putative, expressed
Sobic.005G054000	Suscepible vs Resistant	5 10 15	Lower in Susceptible	289	40	12.8582	38.3333	3.28295	516	30.5123	790.333	24.6599	35.6667	4.25572	37.3333	8.56997	985.333	236.911	1133.67	102.924	30	2.08167	35	7.37111	799	148.716	864	65.5922	AT3G14470.1	NB-ARC domain-containing disease resistance protein	LOC_Os11g28950.1	pollen signalling protein with adenylyl cyclase activity, putative, expressed
Sobic.005G054300	Suscepible vs Resistant	10 15	Lower in Susceptible	170	66.6667	8.95048	66.6667	4.66667	187	15.8219	278.333	2.02759	43.6667	9.68389	86.3333	13.4825	332.667	78.6773	391.333	30.5632	64.6667	4.40959	90	20.0749	284.667	54.2105	282.333	13.1698	AT3G14470.1	NB-ARC domain-containing disease resistance protein	LOC_Os11g47780.1	pollen signalling protein with adenylyl cyclase activity, putative, expressed
Sobic.005G054600	Suscepible vs Resistant	10 15	Lower in Susceptible	170	71.6667	9.8714	50	6.1101	224.667	6.64162	315.667	7.79601	52.3333	6.83943	36.6667	5.78312	416	39.9541	485	15.8745	68.3333	6.88799	43.6667	5.23874	330.667	37.6932	364.667	14.8922	AT3G14470.1	NB-ARC domain-containing disease resistance protein	LOC_Os11g28950.1	pollen signalling protein with adenylyl cyclase activity, putative, expressed
Sobic.005G057000	Suscepible vs Resistant	5 10 15	Lower in Susceptible	289	64	7.50555	43.3333	6.38575	335.667	7.12585	338.333	19.342	37.3333	6.06447	41.6667	6.43774	401	49.6421	355.667	21.3724	63.3333	3.75648	45	5	399.333	14.8922	255.667	13.6667	AT4G19050.1	NB-ARC domain-containing disease resistance protein	LOC_Os04g32940.1	Leucine Rich Repeat family protein, expressed
Sobic.005G057201	Suscepible vs Resistant	5	Higher in Susceptible	107	34.3333	4.48454	22.3333	5.81187	10	1	9	0.57735	35.3333	7.35603	15.3333	4.97773	16.6667	3.4801	7.66667	4.97773	50.6667	3.1798	25.6667	7.5351	16	2	13.3333	0.881917	AT4G19050.1	NB-ARC domain-containing disease resistance protein	LOC_Os04g32940.1	Leucine Rich Repeat family protein, expressed
Sobic.005G071900	Suscepible vs Resistant	10	Higher in Susceptible	115	22.6667	2.33333	17.6667	4.40959	7	3.60555	0	0	21.6667	4.25572	17.3333	1.45297	5	2.64575	5.66667	0.333333	20.6667	0.881917	16.3333	5.78312	12.6667	4.17665	9.33333	2.18581	AT3G07040.1	NB-ARC domain-containing disease resistance protein	ChrUn.fgenesh.mRNA.29	expressed protein
Sobic.005G072000	Suscepible vs Resistant	5 10	Higher in Susceptible	198	355.667	6.93622	312.333	7.42369	9	4.93288	12.3333	6.22718	443.333	20.0194	404	16.5227	8	4.04145	9	4.93288	444.667	27.6305	471.333	39.8176	2.66667	2.66667	2.66667	2.66667	AT3G07040.1	NB-ARC domain-containing disease resistance protein	ChrUn.fgenesh.mRNA.29	expressed protein
Sobic.005G093800	Suscepible vs Resistant	5 10 15	Higher in Susceptible	392	2616.67	246.083	4613.67	506.43	125.333	22.8789	115.667	31.2054	3635.33	455.405	7066.67	102.594	109	16.5227	106	24.379	6965.33	152.962	9345.33	931.351	81.3333	12.1152	71.6667	2.96273	AT3G07040.1	NB-ARC domain-containing disease resistance protein	LOC_Os11g11990.1	NB-ARC domain containing protein, expressed
Sobic.005G094200	Suscepible vs Resistant	5 10	Lower in Susceptible	161	6.33333	3.1798	8	4.6188	97	5.50757	107.333	9.20748	3.33333	3.33333	9.33333	1.85592	99.3333	5.23874	109.333	4.91031	3.33333	1.66667	3.33333	1.66667	173	2.3094	154.667	10.9138	AT3G46710.1	NB-ARC domain-containing disease resistance protein	LOC_Os11g11920.1	resistance protein, putative, expressed
Sobic.005G095000	Suscepible vs Resistant	5 10	Higher in Susceptible	198	306.667	4.25572	462.667	5.36449	33	9.0185	19.3333	0.666667	552.667	106.01	720.333	89.5439	40.6667	5.23874	30.6667	9.17121	364.667	10.9138	506.333	46.6631	25.3333	2.90593	29.6667	5.23874	AT3G07040.1	NB-ARC domain-containing disease resistance protein	LOC_Os11g11770.1	disease resistance protein RPM1, putative, expressed
Sobic.005G095680	Suscepible vs Resistant	5 10 15	Higher in Susceptible	392	30	2.51661	44.6667	3.92994	2	2	2.66667	2.66667	30.3333	3.33333	60	13.7961	9	1.73205	4.66667	2.4037	33.6667	3.38296	57.6667	4.8074	0	0	5	2.51661	AT1G50180.1	NB-ARC domain-containing disease resistance protein	LOC_Os11g11770.1	disease resistance protein RPM1, putative, expressed
Sobic.005G128000	Suscepible vs Resistant	5 10 15	Lower in Susceptible	289	15.3333	0.333333	18	4.3589	307.333	5.04425	323	31.1823	10	1.52753	18.6667	4.48454	388.667	65.92	311.333	7.68838	6.66667	3.52767	6	3.05505	246	11.2694	174.667	16.1692	AT1G50180.1	NB-ARC domain-containing disease resistance protein	LOC_Os11g34920.1	stripe rust resistance protein Yr10, putative, expressed
Sobic.005G150700	Suscepible vs Resistant	5	Higher in Susceptible	107	29.6667	0.666667	33.6667	6.83943	10	0.57735	10.6667	2.60342	17.6667	4.70225	17	4.72582	7.66667	1.66667	9.66667	4.17665	25.6667	3.52767	10.6667	0.666667	10	1.52753	6.66667	0.881917	AT3G07040.1	NB-ARC domain-containing disease resistance protein	LOC_Os12g37740.1	resistance protein LR10, putative, expressed
Sobic.005G167400	Suscepible vs Resistant	5 10 15	Lower in Susceptible	289	63.3333	16.4756	89.3333	28.3392	1629.67	28.0377	2069.33	215.345	66	24.2693	61	17.6163	2170.67	156.423	2463.33	87.1021	62.3333	5.696	49.6667	17.9475	1498.67	79.0808	1066	33.7787	AT3G07040.1	NB-ARC domain-containing disease resistance protein	LOC_Os08g42670.2	resistance protein, putative, expressed
Sobic.005G192100	Suscepible vs Resistant	5 10	Higher in Susceptible	198	95.3333	5.4569	107.667	6.11919	28.6667	0.666667	33.3333	9.02466	96	8.32666	109	10.0167	32.3333	0.881917	41.3333	1.85592	117.333	7.5351	145.667	11.4649	40.3333	4.33333	31.3333	1.45297	AT3G07040.1	NB-ARC domain-containing disease resistance protein	LOC_Os11g37880.1	stripe rust resistance protein Yr10, putative, expressed
Sobic.005G192300	Suscepible vs Resistant	5 10 15	Higher in Susceptible	392	352.667	27.6305	459	40.9186	18.3333	3.84419	17.3333	7.88106	353	19.975	448.333	22.5783	9	0	8.66667	4.91031	428.333	8.21246	471	22.301	2.66667	2.66667	5	0	AT1G50180.1	NB-ARC domain-containing disease resistance protein	LOC_Os02g18510.1	stripe rust resistance protein Yr10, putative, expressed
Sobic.005G192400	Suscepible vs Resistant	5 10	Lower in Susceptible	161	25.6667	5.36449	40.3333	13.8604	590	70.812	478	26.3502	20	3.21455	22.6667	3.4801	732.333	50.0977	576.333	36.8345	25	2.64575	23.6667	1.76383	410.667	15.0591	234.667	2.60342	AT1G50180.1	NB-ARC domain-containing disease resistance protein	LOC_Os11g37880.1	stripe rust resistance protein Yr10, putative, expressed
Sobic.005G212600	Suscepible vs Resistant	5 10 15	Higher in Susceptible	392	38.6667	5.78312	25.6667	1.76383	2	2	2.66667	2.66667	36.3333	4.70225	29.3333	1.33333	0	0	2	2	43.3333	6.35959	25.6667	6.74125	1.66667	1.66667	1.66667	1.66667	AT3G14470.1	NB-ARC domain-containing disease resistance protein	LOC_Os11g44970.1	NBS-LRR disease resistance protein, putative, expressed
Sobic.005G218400	Suscepible vs Resistant	5 10	Lower in Susceptible	161	117	13.1149	103	9.71253	499	23.7136	483.667	20.7311	114	7.37111	120.333	15.0591	695.333	64.0555	571	45.299	193.333	12.1289	164.333	54.9131	580	63.1216	449	13.5031	AT3G07040.1	NB-ARC domain-containing disease resistance protein	LOC_Os10g04180.1	NB-ARC domain containing protein, expressed
Sobic.005G219700	Suscepible vs Resistant	5	Higher in Susceptible	107	22.3333	1.45297	13.3333	3.84419	1.66667	1.66667	2	2	19.3333	7.79601	7	3.78594	3	3	5.33333	3.1798	14.3333	5.48736	13	0.57735	3.33333	1.66667	2.33333	2.33333	AT3G46730.1	NB-ARC domain-containing disease resistance protein	LOC_Os11g46200.1	Leucine Rich Repeat family protein, expressed
Sobic.005G219900	Suscepible vs Resistant	10 15	Higher in Susceptible	200	20.6667	4.91031	13.3333	2.90593	3.33333	3.33333	0	0	26	4.58258	4.66667	2.4037	0	0	4.33333	2.33333	28.6667	3.92994	7	1	3.66667	1.85592	2.33333	2.33333	AT3G07040.1	NB-ARC domain-containing disease resistance protein	LOC_Os11g46210.1	NB-ARC domain containing protein, expressed
Sobic.005G223925	Suscepible vs Resistant	5 10	Lower in Susceptible	161	17.3333	9.33333	31	11.7189	682	38.9744	543.667	28.298	7.33333	7.33333	11	3.21455	709	55.4737	522	33.2916	6	3.05505	6	1	531.333	34.3333	379.667	9.38675	AT3G07040.1	NB-ARC domain-containing disease resistance protein	LOC_Os11g37880.1	stripe rust resistance protein Yr10, putative, expressed
Sobic.005G228250	Suscepible vs Resistant	5 10	Higher in Susceptible	198	462.667	48.6118	480.333	95.0041	49	3.05505	59.6667	9.68389	264	66.5658	341	48.0312	51.6667	11.4649	69	7.0946	466.333	19.785	295.667	31.7508	61.6667	3.38296	39.3333	8.17177	AT3G14470.1	NB-ARC domain-containing disease resistance protein	LOC_Os09g13820.1	pollen signalling protein with adenylyl cyclase activity, putative, expressed
Sobic.007G148100	Suscepible vs Resistant	5 10	Lower in Susceptible	161	19.6667	7.85988	20.3333	3.52767	264.667	20.0859	231	11.0151	18.3333	5.92546	9.33333	1.45297	342	19.1572	249.667	19.5306	17	1.73205	1.66667	1.66667	317	12.5831	269.333	20.5129	AT3G07040.1	NB-ARC domain-containing disease resistance protein	LOC_Os10g04110.1	MLA6 protein, putative, expressed
Sobic.008G031350	Suscepible vs Resistant	5 10	Lower in Susceptible	161	0	0	0	0	29.6667	5.60753	25	3.05505	0	0	0	0	36	5.03322	24.3333	5.36449	0	0	0	0	33.6667	4.91031	14.6667	2.90593	AT3G14470.1	NB-ARC domain-containing disease resistance protein	LOC_Os04g53496.1	NBS-LRR disease resistance protein, putative, expressed
Sobic.008G067700	Suscepible vs Resistant	5 10 15	Higher in Susceptible	392	99.6667	5.17472	126.667	20.5778	0	0	5.66667	2.848	80.6667	11.0955	107	16.0416	0	0	7	4.3589	88.6667	9.82061	111.667	8.74325	1.66667	1.66667	1.66667	1.66667	AT3G46530.1	NB-ARC domain-containing disease resistance protein	LOC_Os08g10440.1	NBS-LRR disease resistance protein, putative, expressed
Sobic.008G067800	Suscepible vs Resistant	5 10 15	Higher in Susceptible	392	58.6667	6.74125	133.333	15.7621	0	0	2.66667	2.66667	98	17.673	186.667	30.9049	5	2.64575	5.33333	2.90593	98.3333	3.4801	185	10.0664	1.66667	1.66667	0	0	AT3G46530.1	NB-ARC domain-containing disease resistance protein	LOC_Os12g09240.1	NBS-LRR disease resistance protein, putative, expressed
Sobic.008G119700	Suscepible vs Resistant	10	Higher in Susceptible	115	6	3	10.6667	2.90593	0	0	0	0	19.6667	3.66667	14.3333	3.4801	3	3	0	0	31	4.58258	25.6667	4.91031	3.66667	1.85592	1.66667	1.66667	AT3G14470.1	NB-ARC domain-containing disease resistance protein	LOC_Os12g25170.1	NB-ARC domain containing disease resistance protein, putative, expressed
Sobic.008G131900	Suscepible vs Resistant	10	Lower in Susceptible	95	27	6.1101	15.6667	3.28295	55	4.72582	38.6667	2.4037	12	3.78594	12.3333	2.66667	40.3333	5.66667	45.6667	7.42369	24.6667	1.76383	14	3	50.6667	5.92546	36.3333	4.48454	AT3G07040.1	NB-ARC domain-containing disease resistance protein	LOC_Os12g37740.1	resistance protein LR10, putative, expressed
Sobic.008G138700	Suscepible vs Resistant	10 15	Lower in Susceptible	170	4	2	0	0	9.66667	1.85592	18	2.08167	0	0	2	2	18.6667	2.4037	14.3333	2.33333	1.66667	1.66667	2	2	8.66667	1.45297	3.33333	1.66667	AT3G07040.1	NB-ARC domain-containing disease resistance protein	LOC_Os12g17480.1	MLA12, putative, expressed
Sobic.008G138900	Suscepible vs Resistant	10 15	Higher in Susceptible	200	14.6667	4.70225	20.3333	5.92546	0	0	0	0	20	6.80686	18.3333	2.4037	0	0	0	0	15.3333	1.45297	31	2.51661	0	0	0	0	AT3G07040.1	NB-ARC domain-containing disease resistance protein	LOC_Os12g17480.1	MLA12, putative, expressed
Sobic.008G177900	Suscepible vs Resistant	5 10	Lower in Susceptible	161	103	17.5214	95.3333	17.5341	1217.33	84.3096	2615.67	483.527	65	3.78594	76	11.5902	754.333	165.032	2259	174.037	74.6667	13.2958	55.6667	2.96273	4075.33	280.41	4888.67	734.668	AT3G14470.1	NB-ARC domain-containing disease resistance protein	LOC_Os12g29710.1	NBS-LRR disease resistance protein, putative, expressed
Sobic.008G184900	Suscepible vs Resistant	5 10 15	Higher in Susceptible	392	49.3333	5.36449	64	1.1547	6.66667	3.38296	2	2	73.6667	8.19214	67.3333	7.85988	3	3	0	0	62	6.50641	52	4.50925	0	0	1.66667	1.66667	AT3G07040.1	NB-ARC domain-containing disease resistance protein	LOC_Os07g26430.1	resistance protein, putative, expressed
Sobic.008G185200	Suscepible vs Resistant	5 10 15	Higher in Susceptible	392	187.333	15.7198	213.333	23.9188	29.6667	2.90593	19.6667	2.18581	350.333	11.865	286	19.1398	21.3333	2.72845	27.3333	5.23874	281	28.1484	184.333	1.45297	24.6667	2.90593	20.6667	1.20185	AT3G46730.1	NB-ARC domain-containing disease resistance protein	LOC_Os12g37740.1	resistance protein LR10, putative, expressed
Sobic.009G020600	Suscepible vs Resistant	5	Higher in Susceptible	107	29	1.52753	36	2.3094	9.66667	2.33333	14.6667	4.37163	33.6667	5.81187	54.3333	6.74125	16.3333	5.4569	19.6667	1.45297	40.6667	7.05534	74.3333	20.9868	25.3333	3.84419	18.6667	2.33333	AT3G46530.1	NB-ARC domain-containing disease resistance protein	LOC_Os12g28100.1	NBS-LRR disease resistance protein, putative, expressed
Sobic.009G220500	Suscepible vs Resistant	5 10 15	Lower in Susceptible	289	27.6667	3.1798	32.6667	5.48736	329	29.5691	395.333	3.28295	43.3333	12.7061	40.6667	5.17472	347	42.0159	427.667	26.5477	35.6667	2.4037	50.6667	6.00925	535.667	27.7629	533.333	34.0653	AT3G14470.1	NB-ARC domain-containing disease resistance protein	LOC_Os04g53160.1	NBS-LRR disease resistance protein, putative, expressed
Sobic.009G221000	Suscepible vs Resistant	5 10 15	Lower in Susceptible	289	63.3333	5.81187	56.3333	4.48454	260.333	20.6908	282.667	29.9796	66	6.50641	74.3333	16.272	256.333	22.9298	305.667	9.27961	72	11.5036	92.6667	11.348	362	24.7049	375.333	21.1056	AT3G14470.1	NB-ARC domain-containing disease resistance protein	LOC_Os04g53160.1	NBS-LRR disease resistance protein, putative, expressed
Sobic.010G120700	Suscepible vs Resistant	5 10 15	Higher in Susceptible	392	142.333	10.3494	168	12	21	2	24.6667	4.91031	139.333	6.22718	157	5.56776	30.6667	2.33333	26	3.21455	205	7.57188	180.667	21.458	29.6667	5.48736	32.3333	1.20185	AT3G07040.1	NB-ARC domain-containing disease resistance protein	LOC_Os06g17880.1	NBS-LRR disease resistance protein, putative, expressed
Sobic.010G164600	Suscepible vs Resistant	5 10 15	Lower in Susceptible	289	0	0	4	2	36.6667	2.4037	30.6667	5.78312	0	0	2.33333	2.33333	39	3.05505	37.3333	2.02759	1.66667	1.66667	0	0	40.3333	2.90593	34	3.78594	AT3G46710.1	NB-ARC domain-containing disease resistance protein	LOC_Os08g14850.1	resistance protein, putative, expressed
Sobic.010G248400	Suscepible vs Resistant	10 15	Higher in Susceptible	200	11.3333	1.85592	21	2.51661	0	0	0	0	16.6667	2.33333	18.6667	0.333333	0	0	0	0	12.6667	2.18581	23.6667	3.84419	0	0	1.66667	1.66667	AT3G07040.1	NB-ARC domain-containing disease resistance protein	LOC_Os06g48520.1	disease resistance protein RPM1, putative, expressed
Sobic.010G248500	Suscepible vs Resistant	5 10 15	Higher in Susceptible	392	98.6667	12.9915	183.333	22.4524	2	2	7.66667	4.97773	123.667	37.2842	256	40.0042	3	3	9.33333	2.4037	156	16.8226	330.333	45.6995	1.66667	1.66667	1.66667	1.66667	AT3G07040.1	NB-ARC domain-containing disease resistance protein	LOC_Os06g48520.1	disease resistance protein RPM1, putative, expressed
Sobic.008G043100	Suscepible vs Resistant	5 10	Higher in Susceptible	198	77	16.1658	39	5.85947	23.6667	1.20185	26.3333	4.70225	68.6667	25.7574	24	9.86577	23	1.52753	19	2.08167	65.3333	2.72845	22.3333	9.02466	20.6667	4.25572	24.3333	3.38296	AT5G06320.1	NDR1/HIN1-like 3	LOC_Os12g06220.1	harpin-induced protein 1 domain containing protein, expressed
Sobic.003G226300	Suscepible vs Resistant	5 10 15	Higher in Susceptible	392	80.3333	13.2832	44.3333	12.0185	12.6667	1.20185	13.3333	1.85592	62.6667	5.78312	19.6667	5.696	17.3333	2.848	9.66667	1.20185	65.3333	9.17121	42.3333	18.7469	12	1.52753	7	2	AT2G38010.1	Neutral/alkaline non-lysosomal ceramidase	LOC_Os01g43520.1	neutral ceramidase precursor, putative, expressed
Sobic.010G077400	Suscepible vs Resistant	5 10	Higher in Susceptible	198	154	18.5023	227.333	36.0293	26.6667	1.85592	25.3333	2.90593	139	18.23	236.333	31.3546	22.6667	2.18581	44.3333	0.666667	183.333	23.9049	195	34.1223	56	3.21455	53.6667	8.41295	AT5G12040.1	Nitrilase/cyanide hydratase and apolipoprotein N-acyltransferase family protein	LOC_Os06g10420.1	nitrilase, putative, expressed
Sobic.007G038500	Suscepible vs Resistant	10 15	Lower in Susceptible	170	0	0	2	2	13.3333	6.35959	7	1	0	0	0	0	19	0.57735	11	1.52753	1.66667	1.66667	1.66667	1.66667	8.66667	2.02759	8	1.73205	AT4G10380.1	NOD26-like intrinsic protein 5;1	LOC_Os08g05580.1	aquaporin protein, putative, expressed
Sobic.003G327900	Suscepible vs Resistant	5	Higher in Susceptible	107	637.667	96.4319	1016.67	141.509	166.667	34.7099	292	50.1431	1010.33	94.1494	1178.67	203.228	323.667	54.5476	222.333	46.0953	592.333	71.0923	669.667	126.336	247	9.71253	250	12.741	AT5G07050.1	nodulin MtN21 /EamA-like transporter family protein	LOC_Os01g58910.1	auxin-induced protein 5NG4, putative, expressed
Sobic.004G002901	Suscepible vs Resistant	5	Higher in Susceptible	107	24.3333	7.42369	11.6667	2.33333	2	2	0	0	16	2.08167	2	2	2	2	0	0	33.3333	3.92994	11.3333	5.92546	0	0	1.66667	1.66667	AT3G30340.1	nodulin MtN21 /EamA-like transporter family protein	LOC_Os06g01966.1	auxin-induced protein 5NG4, putative, expressed
Sobic.009G181700	Suscepible vs Resistant	5 10	Higher in Susceptible	198	75.6667	12.9786	48	5.1316	21	2.08167	31	7.50555	93.6667	19.936	55.6667	18.7469	25	9.60902	19.3333	2.72845	63	7.2111	23	5.50757	12	3.78594	13.3333	0.881917	AT5G07050.1	nodulin MtN21 /EamA-like transporter family protein	LOC_Os05g41420.1	auxin-induced protein 5NG4, putative, expressed
Sobic.002G237800	Suscepible vs Resistant	10 15	Lower in Susceptible	170	125.667	16.0451	112.333	9.82061	371.667	24.9154	329	13.5769	67	12.3423	72.3333	13.7154	338	33.8674	313	37.8021	76.6667	4.05518	54.6667	7.17248	263.667	31.4766	218	4.93288	AT3G13180.1	NOL1/NOP2/sun family protein / antitermination NusB domain-containing protein	LOC_Os09g30100.1	NOL1/NOP2/sun family protein, putative, expressed
Sobic.002G095600	Suscepible vs Resistant	5	Lower in Susceptible	131	22	4.72582	22	6.02771	76.6667	42.6862	45.6667	15.6027	119	93.0018	23	8.5049	280	226.537	38	7	37	9.0185	32	10.0664	70.3333	31.8346	30	3.05505	AT1G15960.1	NRAMP metal ion transporter 6	LOC_Os07g15460.1	metal transporter Nramp6, putative, expressed
Sobic.007G209300	Suscepible vs Resistant	10	Lower in Susceptible	95	8	1	3.33333	3.33333	10.6667	2.60342	15.6667	3.52767	0	0	12.6667	2.33333	11.6667	2.96273	14.6667	2.33333	13	4.6188	14.6667	1.45297	13.6667	0.666667	20.6667	1.20185	AT1G51130.1	Nse4, component of Smc5/6 DNA repair complex	LOC_Os08g40010.1	expressed protein
Sobic.010G193700	Suscepible vs Resistant	10 15	Lower in Susceptible	170	27	2.64575	11.6667	1.45297	21	5.03322	18	8.32666	13	3	8.66667	0.881917	33.6667	8.76229	28.6667	5.17472	30.3333	3.28295	12.6667	8.96908	33	14	24.3333	4.63081	AT1G51130.1	Nse4, component of Smc5/6 DNA repair complex	LOC_Os06g41380.1	expressed protein
Sobic.003G417800	Suscepible vs Resistant	10	Lower in Susceptible	95	31	7	18.6667	2.33333	29	6.65833	31	8.62168	15.6667	3.84419	15.6667	0.666667	49	20.4287	45	16.0416	57.6667	1.76383	23.6667	6.83943	75.6667	21.9874	78.6667	13.7396	AT2G47810.1	nuclear factor Y, subunit B5	LOC_Os01g70890.1	histone-like transcription factor and archaeal histone, putative, expressed
Sobic.010G165700	Suscepible vs Resistant	5 10 15	Higher in Susceptible	392	298.333	15.4524	286.333	24.9154	10	6.4291	10.3333	5.36449	220.333	39.3503	320.667	52.3142	2	2	7.66667	3.84419	199.667	10.4775	196.333	25.4318	2.66667	2.66667	2.66667	2.66667	AT1G52950.1	Nucleic acid-binding, OB-fold-like protein	LOC_Os07g02230.1	retrotransposon protein, putative, unclassified, expressed
Sobic.001G361000	Suscepible vs Resistant	5 10 15	Lower in Susceptible	289	16	3.51188	14	4.04145	104.333	9.40449	101	5.1316	4.66667	4.66667	9.33333	1.76383	85.3333	5.36449	79.3333	4.37163	12.6667	2.18581	19.3333	2.33333	102.333	14.8137	106.333	13.0171	AT1G07130.1	Nucleic acid-binding, OB-fold-like protein	LOC_Os03g25130.2	OB-fold nucleic acid binding domain containing protein, putative, expressed
Sobic.002G237400	Suscepible vs Resistant	10	Higher in Susceptible	115	7	1	11.3333	2.02759	0	0	0	0	17.3333	2.72845	15	1.1547	0	0	0	0	10.3333	0.666667	9.66667	2.02759	1.66667	1.66667	0	0	AT2G40020.2	Nucleolar histone methyltransferase-related protein	LOC_Os09g02690.1	expressed protein
Sobic.004G152501	Suscepible vs Resistant	5 10	Higher in Susceptible	198	54.3333	6.69162	49	5.2915	1.66667	1.66667	4	2	33	4.72582	35.3333	4.17665	0	0	1.66667	1.66667	58	1	51	4.50925	0	0	3.33333	1.66667	AT2G39630.2	Nucleotide-diphospho-sugar transferases superfamily protein	LOC_Os03g60700.1	dolichyl-phosphate beta-glycosyltransferase, putative, expressed
Sobic.010G197300	Suscepible vs Resistant	10 15	Higher in Susceptible	200	124.333	24.3333	83	6.80686	9.33333	9.33333	4	4	90.6667	17.6383	36	4.93288	0	0	5.66667	2.848	83.3333	3.28295	22.3333	9.56266	3.33333	1.66667	5.66667	0.666667	AT5G03760.1	Nucleotide-diphospho-sugar transferases superfamily protein	LOC_Os06g42020.1	CSLA9 - cellulose synthase-like family A, expressed
Sobic.010G136250	Suscepible vs Resistant	5 10 15	Higher in Susceptible	392	66.6667	15.2461	39	2.3094	3.66667	3.66667	2.66667	2.66667	42.3333	13.4205	29.6667	2.90593	2	2	3.66667	1.85592	64.6667	4.48454	48	2.08167	0	0	0	0	AT1G27600.1	Nucleotide-diphospho-sugar transferases superfamily protein	LOC_Os03g17850.1	glycosyltransferase family 43 protein, putative, expressed
Sobic.008G014700	Suscepible vs Resistant	10	Higher in Susceptible	115	16.3333	2.848	8.33333	1.20185	9.66667	2.4037	8	5.2915	22.6667	4.17665	5.33333	2.90593	4	2	0	0	20.6667	2.33333	7.33333	4.05518	6	3.05505	11.6667	1.45297	AT4G32390.1	Nucleotide-sugar transporter family protein	LOC_Os12g04170.1	domain of unknown function, DUF250 domain containing protein, expressed
Sobic.002G349000	Suscepible vs Resistant	10	Lower in Susceptible	95	15.6667	3.33333	10	1.52753	18.6667	0.881917	17.3333	4.48454	3.66667	3.66667	6.33333	0.333333	23	0.57735	18.3333	3.84419	12.3333	1.45297	9.66667	3.28295	22.3333	3.1798	23.6667	2.33333	AT4G35335.1	Nucleotide-sugar transporter family protein	LOC_Os07g38610.1	UAA transporter family domain containing protein, expressed
Sobic.002G020000	Suscepible vs Resistant	10 15	Higher in Susceptible	200	7.69369e+06	7.69353e+06	116.333	76.6645	92.3333	14.4952	33	6.65833	169.667	74.4812	3	3	33	16.3707	35	18.735	33.6667	13.1698	11.3333	3.4801	22.3333	11.4649	3.66667	3.66667	AT3G49190.1	O-acyltransferase (WSD1-like) family protein	LOC_Os01g56360.1	wax synthase, putative, expressed
Sobic.003G241900	Suscepible vs Resistant	5	Lower in Susceptible	131	3015.67	299.795	6107	2041.51	19659.3	10913.9	10045	4187.69	14778.7	8314.2	9533	3955.31	35447.3	8427.97	13788.3	4550.88	3361.33	1004.24	2081.67	318.853	8126.67	3338.79	3571	1942.52	AT5G53450.1	OBP3-responsive gene 1	LOC_Os01g46720.1	expressed protein
Sobic.009G163400	Suscepible vs Resistant	10	Lower in Susceptible	95	15.6667	1.76383	11.3333	0.881917	26.3333	3.52767	21.3333	2.848	3.33333	3.33333	8.66667	1.20185	24	8.02081	22.6667	4.33333	15.6667	3.71184	10	1.1547	29.6667	3.1798	25	1.52753	AT2G01480.1	O-fucosyltransferase family protein	LOC_Os05g38490.1	growth regulator related protein, putative, expressed
Sobic.002G328600	Suscepible vs Resistant	10 15	Higher in Susceptible	200	91.6667	10.6667	33.3333	0.881917	40.3333	5.04425	52.3333	10.1708	75	33.8674	19	3.05505	24.6667	4.37163	35.3333	4.70225	29.6667	5.04425	30	8.18535	17	1.73205	27.3333	3.1798	AT4G26830.1	O-Glycosyl hydrolases family 17 protein	LOC_Os07g35350.1	glucan endo-1,3-beta-glucosidase precursor, putative, expressed
Sobic.004G273400	Suscepible vs Resistant	10 15	Higher in Susceptible	200	141.333	19.7428	253.333	116.575	86.6667	15.3007	57	1	1117.33	362.905	871.333	307.22	94.3333	17.4579	73.6667	4.25572	193	58.6174	387.333	146.07	69.3333	7.31057	87.3333	25.8349	AT5G64410.1	oligopeptide transporter 4	LOC_Os01g43940.1	oligopeptide transporter, putative, expressed
Sobic.007G059100	Suscepible vs Resistant	10 15	Higher in Susceptible	200	622	285.055	1544	529.525	511	168.334	198.667	46.6417	1410	308.078	2324.33	327.46	362	40.4475	181.667	41.0298	704.333	209.046	1254	687.928	112	20.5264	200.333	41.7027	AT5G54160.1	O-methyltransferase 1	LOC_Os04g01470.1	O-methyltransferase, putative, expressed
Sobic.007G170500	Suscepible vs Resistant	5	Higher in Susceptible	107	188.667	11.0955	115	13.8924	54.6667	16.5965	73	18.5023	282.667	55.7863	68.3333	15.0148	106.667	44.2016	57.3333	24.037	475.667	45.2008	35	6.08276	148	68.6246	133.667	24.0439	AT4G35160.1	O-methyltransferase family protein	LOC_Os11g33300.1	O-methyltransferase, putative, expressed
Sobic.009G197000	Suscepible vs Resistant	5 10	Higher in Susceptible	198	2064.33	353.271	2160	168.09	39.6667	4.40959	75.6667	6.38575	2196.67	411.816	2097	768.446	61.3333	17.8543	91.3333	17.8543	3496	534.45	1800.33	624.532	74.3333	3.84419	78.3333	10.0388	AT4G35160.1	O-methyltransferase family protein	LOC_Os05g43930.1	O-methyltransferase, putative, expressed
Sobic.009G197100	Suscepible vs Resistant	5 10	Higher in Susceptible	198	120	29.1605	72	6.80686	27.3333	5.36449	19.3333	2.33333	154.667	12.9142	35	9.53939	13.3333	3.71184	13.6667	0.881917	127.333	6.88799	48	15.1438	21.3333	4.91031	17	2.08167	AT4G35160.1	O-methyltransferase family protein	LOC_Os05g43940.1	O-methyltransferase, putative, expressed
Sobic.005G216200	Suscepible vs Resistant	10 15	Higher in Susceptible	200	121.333	46.2181	357.333	120.778	80	26.8576	99.6667	15.7198	306.333	123.528	381.333	91.3498	89.3333	25.6537	99	12.4231	416.333	95.0164	392.333	75.1273	83	18.6815	187.667	14.6553	AT4G35160.1	O-methyltransferase family protein	LOC_Os11g33300.1	O-methyltransferase, putative, expressed
Sobic.007G074800	Suscepible vs Resistant	10 15	Higher in Susceptible	200	89.6667	1.20185	53.3333	13.3333	48.3333	3.84419	39.6667	3.1798	111.667	19.9694	15.6667	9.24362	37.3333	6.17342	49.3333	13.1318	337.667	56.3363	31.3333	13.0171	66.6667	7.2188	70.3333	11.3186	AT4G35160.1	O-methyltransferase family protein	LOC_Os05g43930.1	O-methyltransferase, putative, expressed
Sobic.002G079500	Suscepible vs Resistant	5	Lower in Susceptible	131	10	1	5.66667	3.1798	30.3333	2.66667	18.3333	5.54777	14.6667	4.63081	8.33333	1.85592	34.3333	9.8714	18.6667	3.66667	13.6667	4.25572	9	1	32.3333	2.60342	31	1.1547	AT4G35150.1	O-methyltransferase family protein	LOC_Os08g35310.1	O-methyltransferase, putative, expressed
Sobic.002G079300	Suscepible vs Resistant	5 10 15	Lower in Susceptible	289	2	2	7.66667	3.92994	106.333	8.45248	73.3333	14.24	3.33333	3.33333	0	0	102	13.8564	90.3333	11.8369	1.66667	1.66667	1.66667	1.66667	116.333	21.797	92.6667	6.35959	AT1G51990.2	O-methyltransferase family protein	LOC_Os08g07260.1	O-methyltransferase, putative, expressed
Sobic.008G013900	Suscepible vs Resistant	5 10 15	Lower in Susceptible	289	15.3333	2.33333	17.3333	6.33333	67.3333	10.1708	46.6667	10.9291	9.33333	1.20185	7.66667	3.84419	56.3333	11.893	61.6667	3.28295	17.3333	2.848	6.66667	6.66667	58	12.0139	55	5.1316	AT1G51990.2	O-methyltransferase family protein	LOC_Os06g13280.1	O-methyltransferase, putative, expressed
Sobic.006G227900	Suscepible vs Resistant	10 15	Higher in Susceptible	200	71.6667	17.6383	92	15.1767	26.3333	5.84047	28	8.62168	161.667	12.6667	416.667	93.9758	45.3333	9.17121	30.3333	4.63081	89.6667	12.6007	182	64.2106	22.3333	2.90593	25	3.78594	AT3G20660.1	organic cation/carnitine transporter4	LOC_Os04g53930.1	organic cation transporter protein, putative, expressed
Sobic.001G541800	Suscepible vs Resistant	10 15	Lower in Susceptible	170	104.333	23.3333	68	7.37111	284	46.6083	309.333	8.33333	61.3333	5.89727	89.6667	16.9542	220	13.7961	245.333	20.2759	321.667	99.1066	188	38.553	542	150.819	389.667	28.3451	AT4G22540.1	OSBP(oxysterol binding protein)-related protein 2A	LOC_Os10g40590.1	oxysterol-binding protein, putative, expressed
Sobic.008G182900	Suscepible vs Resistant	10	Higher in Susceptible	115	928	434.777	3406.67	1180.85	1239	496.278	643.667	219.776	1781	180.29	3420.67	178.395	453.333	78.0135	526	296.076	2541.33	1232.68	8255.67	764.852	776.333	314.81	2879.67	1329.61	AT4G11650.1	osmotin 34	LOC_Os12g43430.1	thaumatin, putative, expressed
Sobic.008G182700	Suscepible vs Resistant	5 10	Lower in Susceptible	161	6.3439e+06	6.3438e+06	355	99.5004	731	260.294	431.333	164.82	142	37.6475	393.667	86.6686	541.667	74.7113	478.667	281.561	439	305.31	1728	1019.51	303.667	80.0757	1014	361.696	AT4G11650.1	osmotin 34	LOC_Os12g43430.1	thaumatin, putative, expressed
Sobic.008G182400	Suscepible vs Resistant	5 10 15	Lower in Susceptible	289	2	2	3.66667	3.66667	23.3333	5.84047	17.6667	4.63081	0	0	0	0	21.6667	3.84419	13	2.08167	0	0	0	0	12	3.05505	13	3.60555	AT4G11650.1	osmotin 34	LOC_Os12g43440.1	thaumatin, putative, expressed
Sobic.001G497800	Suscepible vs Resistant	10 15	Higher in Susceptible	200	29	2.51661	18.3333	4.84195	14.6667	2.72845	12.3333	2.33333	32	5.7735	10	1.52753	12.6667	1.66667	16	0.57735	27.6667	1.76383	4.66667	2.4037	13.3333	2.02759	21	4.3589	AT1G05420.1	ovate family protein 12	LOC_Os03g06350.1	DUF623 domain containing protein, expressed
Sobic.008G042200	Suscepible vs Resistant	5	Higher in Susceptible	107	50	26.6271	12.3333	6.69162	8.33333	4.25572	14.6667	3.52767	19.3333	3.66667	3.33333	3.33333	10.3333	2.33333	10	5.7735	38.3333	5.23874	37.3333	23.2475	15	4.3589	15	3.4641	AT3G52525.1	ovate family protein 6	LOC_Os12g06160.1	DUF623 domain containing protein, expressed
Sobic.006G191600	Suscepible vs Resistant	5	Lower in Susceptible	131	515	59.7746	3734	660.496	2119.67	401.099	4319.33	490.641	1330.33	551.029	3185	1216.43	3156	384.621	2085	192.518	293.667	187.243	1217	270.223	901.667	242.304	692	46.6512	AT5G56550.1	oxidative stress 3	LOC_Os04g49370.1	expressed protein
Sobic.004G337200	Suscepible vs Resistant	5 10 15	Lower in Susceptible	289	139	18.0278	226.333	31.6719	1379	112.5	1309.33	46.884	87.3333	19.8774	216.333	34.7099	1229.67	69.4774	1209.33	106.315	151.333	18.2056	204.667	52.2313	1415	106.533	1400.33	92.2936	AT4G21580.1	oxidoreductase, zinc-binding dehydrogenase family protein	LOC_Os02g56180.1	dehydrogenase, putative, expressed
Sobic.003G101200	Suscepible vs Resistant	5	Lower in Susceptible	131	4.66667	2.4037	4.66667	2.4037	31.3333	4.66667	16	0.57735	3.66667	3.66667	8	1.1547	14.3333	1.20185	19.3333	3.84419	3.33333	3.33333	4.33333	2.33333	13.3333	5.4569	17	1.73205	AT1G24200.1	Paired amphipathic helix (PAH2) superfamily protein	LOC_Os08g25200.1	paired amphipathic helix repeat-containing protein, putative, expressed
Sobic.007G065000	Suscepible vs Resistant	10 15	Higher in Susceptible	200	16.6667	4.25572	17	2.08167	3.66667	1.85592	11	1.52753	17	1	7.33333	0.881917	2	2	8	2	19	2.51661	8	4	2.66667	2.66667	6	3.21455	AT4G28556.1	PAK-box/P21-Rho-binding family protein	LOC_Os01g65210.1	proton-dependent oligopeptide transport, putative, expressed
Sobic.008G031300	Suscepible vs Resistant	5 10 15	Lower in Susceptible	289	14	1	18.6667	1.33333	91.6667	7.83865	115.667	13.2204	7.33333	3.71184	13	2.51661	96	2.64575	113	8.73689	13	1.1547	10.3333	2.60342	96	6.55744	119	12.5033	AT3G51620.2	PAP/OAS1 substrate-binding domain superfamily	LOC_Os12g02260.1	nucleotidyltransferase, putative, expressed
Sobic.005G219000	Suscepible vs Resistant	10	Higher in Susceptible	115	79.6667	31.2481	1400.33	810.921	112.667	51.5666	54.6667	14.746	1301.33	1000.19	6767.33	2260.79	135.333	26.3397	170.667	52.2345	291.333	44.4685	8924.67	4982.31	336.333	118.423	255	92.2298	AT4G37050.1	PATATIN-like protein 4	LOC_Os11g39990.1	patatin, putative, expressed
Sobic.006G015900	Suscepible vs Resistant	10 15	Higher in Susceptible	200	77	4.72582	65.6667	8.25295	37.6667	3.84419	25.6667	3.84419	74.6667	11.2002	47.3333	4.09607	25.6667	2.02759	20.3333	1.20185	70.6667	6.17342	42.3333	7.75314	33	2.3094	30	2.3094	AT1G75800.1	Pathogenesis-related thaumatin superfamily protein	LOC_Os10g05660.1	thaumatin, putative, expressed
Sobic.008G135600	Suscepible vs Resistant	10 15	Higher in Susceptible	200	522.667	17.6761	524	138.424	275	106.627	475.667	137.235	485.667	199.337	455.333	70.2053	135	9.86577	207.333	38.9629	266	32.6241	412.667	199.108	204.667	46.4913	284.667	46.0953	AT2G28790.1	Pathogenesis-related thaumatin superfamily protein	LOC_Os12g38150.1	osmotin, putative, expressed
Sobic.003G050100	Suscepible vs Resistant	5	Lower in Susceptible	131	24	7.93725	27.6667	3.38296	104	13.6504	97.3333	1.76383	32.6667	8.95048	24	1	84	6.02771	81.3333	4.05518	26.3333	3.28295	24.3333	2.90593	53	6.65833	59.6667	3.1798	AT1G05650.1	Pectin lyase-like superfamily protein	LOC_Os01g07790.1	polygalacturonase, putative, expressed
Sobic.005G159801	Suscepible vs Resistant	5	Higher in Susceptible	107	648.667	77.2924	663.333	108.29	156	13.3167	163	16.6233	407.667	144.41	531	123.525	139	23.5018	140.667	8.41295	545.333	28.3392	426.667	40.7035	117.667	8.45248	113.667	14.7686	AT1G57590.1	Pectinacetylesterase family protein	LOC_Os07g44070.1	pectinacetylesterase domain containing protein, expressed
Sobic.006G061000	Suscepible vs Resistant	5	Higher in Susceptible	107	97	13.5769	135	10.0167	28.3333	0.881917	24.3333	0.333333	65.3333	17.9475	110.333	27.7208	28	5	33.3333	5.04425	85.3333	12.4544	116.333	26.7727	43	6.1101	45	0	AT5G61800.1	Pentatricopeptide repeat (PPR) superfamily protein	LOC_Os04g32870.1	pentatricopeptide repeat-containing protein, putative, expressed
Sobic.008G185300	Suscepible vs Resistant	5	Higher in Susceptible	107	210	18.2483	173.667	1.85592	63.3333	8.08977	56.6667	4.33333	172.333	21.3724	178	13.5277	60	3.4641	55.6667	3.84419	217	10.5357	176.333	17.0229	55.3333	3.38296	45	4.04145	AT5G43820.1	Pentatricopeptide repeat (PPR) superfamily protein	LOC_Os02g20160.1	PPR repeat domain containing protein, putative, expressed
Sobic.001G391101	Suscepible vs Resistant	10	Lower in Susceptible	95	13.3333	2.848	6	3.05505	8.66667	0.333333	9	1.52753	0	0	10.6667	6.35959	15.6667	0.333333	12.3333	0.881917	23.6667	4.40959	26.6667	7.68838	24.3333	2.96273	20.6667	2.60342	AT1G56690.1	Pentatricopeptide repeat (PPR) superfamily protein	LOC_Os03g20190.1	pentatricopeptide, putative, expressed
Sobic.002G198900	Suscepible vs Resistant	10	Lower in Susceptible	95	9	4.93288	3	3	10	1	5.66667	2.848	3.33333	3.33333	10	2.3094	19.3333	4.40959	14	1.52753	21.6667	0.333333	27.6667	3.92994	23.3333	2.4037	29	1.73205	AT5G61400.1	Pentatricopeptide repeat (PPR) superfamily protein	LOC_Os09g25050.1	PPR repeat domain containing protein, putative, expressed
Sobic.004G025100	Suscepible vs Resistant	10 15	Lower in Susceptible	170	14.6667	1.85592	11	4.04145	17	4.04145	10.3333	1.20185	7.66667	3.84419	6.33333	3.1798	24.6667	3.38296	16.6667	2.18581	26.6667	0.881917	25.3333	1.20185	31	3.21455	28	4.72582	AT1G18485.1	Pentatricopeptide repeat (PPR) superfamily protein	LOC_Os02g03420.1	pentatricopeptide repeat-containing protein, putative, expressed
Sobic.005G081000	Suscepible vs Resistant	5 10 15	Lower in Susceptible	289	10	1	10	6.4291	71.3333	3.75648	58.6667	5.54777	14.6667	4.33333	14	2.08167	78.3333	4.66667	66.6667	17.1302	22.3333	5.48736	40.3333	2.4037	79	3.78594	79	1.52753	AT3G11460.1	Pentatricopeptide repeat (PPR) superfamily protein	LOC_Os11g14980.1	pentatricopeptide, putative, expressed
Sobic.008G066900	Suscepible vs Resistant	10 15	Lower in Susceptible	170	13.3333	1.45297	9.66667	2.33333	13.6667	3.28295	20	2.51661	2.33333	2.33333	9	3	21.6667	2.18581	23.6667	3.66667	16.6667	2.02759	28	1.73205	24.3333	3.4801	26.3333	4.40959	AT2G46050.1	Pentatricopeptide repeat (PPR-like) superfamily protein	LOC_Os07g15570.1	pentatricopeptide, putative, expressed
Sobic.007G212000	Suscepible vs Resistant	5 10	Higher in Susceptible	198	38.3333	4.70225	34	2.88675	11	3.4641	11.6667	2.02759	30	2.88675	31	3.60555	10.3333	5.17472	9	1.73205	27.3333	0.881917	33.6667	7.83865	11.6667	2.72845	12.3333	2.33333	AT1G17750.1	PEP1 receptor 2	LOC_Os10g06760.1	receptor-like protein kinase precursor, putative, expressed
Sobic.002G093500	Suscepible vs Resistant	10 15	Higher in Susceptible	200	156.333	30.9641	154.333	18.5861	52.3333	6.17342	45.3333	4.17665	46.6667	18.6756	59.6667	11.0504	16	2.88675	35.6667	13.8604	24339335	2.43387e+07	646.667	176.798	162	27.2213	183.333	33.9329	AT3G02875.1	Peptidase M20/M25/M40 family protein	LOC_Os07g14590.1	hydrolase, putative, expressed
Sobic.001G276100	Suscepible vs Resistant	10 15	Higher in Susceptible	200	144.667	9.76957	218	44.7698	144.333	41.3495	131.333	29.3561	141.333	33.5675	124	11.1505	42.3333	9.82061	83.6667	6.06447	927	140.171	1240.67	136.921	777.333	87.6362	922.667	61.0528	AT2G02040.1	peptide transporter 2	LOC_Os10g22560.3	peptide transporter PTR2, putative, expressed
Sobic.001G080300	Suscepible vs Resistant	5	Higher in Susceptible	107	31.6667	5.54777	45.3333	7.5351	8.33333	1.20185	23.6667	6.64162	40.6667	9.13479	75	16.5227	19.6667	4.97773	27.3333	2.848	25	2.64575	46	3.78594	13.6667	2.4037	22.6667	2.4037	AT4G37530.1	Peroxidase superfamily protein	LOC_Os03g55410.1	peroxidase precursor, putative, expressed
Sobic.007G014200	Suscepible vs Resistant	5 10	Higher in Susceptible	198	43.6667	7.5351	80	8.02081	16.6667	4.37163	32.6667	5.696	72.3333	13.5442	135.333	14.3101	20	1.52753	58.3333	17.0326	148	10.116	527.333	69.5996	123.667	23.3619	124	6.50641	AT4G33420.1	Peroxidase superfamily protein	LOC_Os08g02110.1	peroxidase precursor, putative, expressed
Sobic.003G050300	Suscepible vs Resistant	10 15	Higher in Susceptible	200	204	29.5973	243.333	27.0329	72	20	88.3333	17.3813	397.333	48.8751	219.667	23.3833	69.6667	10.105	68.6667	7.2188	135	4.58258	109.333	34.6474	75.6667	10.0885	42.6667	3.4801	AT2G41480.1	Peroxidase superfamily protein	LOC_Os01g07770.1	peroxidase precursor, putative, expressed
Sobic.009G144900	Suscepible vs Resistant	10 15	Higher in Susceptible	200	11.3333	0.881917	101.667	27.0206	3.66667	3.66667	16.6667	8.41295	25.3333	6.11919	205	134.131	7	1	5.66667	3.1798	54.3333	28.3862	302.333	185.142	28.6667	10.2035	12.3333	2.66667	AT5G06730.1	Peroxidase superfamily protein	LOC_Os03g13180.1	peroxidase precursor, putative, expressed
Sobic.010G162000	Suscepible vs Resistant	10 15	Higher in Susceptible	200	168	71.4516	583.667	201.977	99.6667	9.90511	143	14.9778	266	95.3887	641.333	49.9811	56.6667	18.4962	88.6667	48.254	277.667	100.905	1316.67	514.303	55.3333	20.5372	146.333	98.9046	AT5G05340.1	Peroxidase superfamily protein	LOC_Os06g35520.1	peroxidase precursor, putative, expressed
Sobic.008G010400	Suscepible vs Resistant	5	Lower in Susceptible	131	12	0.57735	4.66667	2.4037	36	3.05505	26.3333	5.84047	24.3333	8.87568	0	0	38	11.0604	19.6667	2.18581	5	2.88675	2.66667	2.66667	27.6667	4.09607	16.3333	2.90593	AT5G05340.1	Peroxidase superfamily protein	LOC_Os11g02130.1	peroxidase precursor, putative, expressed
Sobic.009G218450	Suscepible vs Resistant	10 15	Lower in Susceptible	170	16.6667	2.02759	12.6667	0.881917	40.3333	4.17665	32.3333	4.63081	8.66667	1.66667	15	1.1547	46	11.9304	44	8.88819	19.3333	2.02759	9.33333	2.33333	28.6667	2.96273	28.6667	1.45297	AT1G02520.1	P-glycoprotein 11	LOC_Os01g50160.1	MDR-like ABC transporter, putative, expressed
Sobic.004G340566	Suscepible vs Resistant	5	Lower in Susceptible	131	13	3.51188	14.3333	2.02759	49.6667	6.17342	54	6.08276	17.3333	2.96273	14.6667	4.91031	38.6667	5.04425	43	4.04145	12.3333	0.881917	11	0.57735	46.6667	6.64162	45.6667	2.90593	AT2G02230.1	phloem protein 2-B1	LOC_Os02g56840.1	OsFBX70 - F-box domain containing protein, expressed
Sobic.003G344800	Suscepible vs Resistant	5 10 15	Higher in Susceptible	392	759.667	27.3821	617	43.2936	206.667	27.8468	178.667	11.5662	839.667	68.1673	782.333	11.5662	172.333	12.3468	179.667	5.84047	343.333	25.1153	242.667	6.98411	199.333	8.74325	206.333	12.3468	AT5G58560.1	Phosphatidate cytidylyltransferase family protein	LOC_Os01g61560.1	phosphatidate cytidylyltransferase, putative, expressed
Sobic.005G026800	Suscepible vs Resistant	5 10 15	Higher in Susceptible	392	113.333	14.1461	134.667	12.3468	19	1.52753	18	4.6188	143.333	7.42369	144.667	1.20185	13.6667	2.18581	16.6667	2.60342	113.333	6.64162	166.667	8.83805	14	2.3094	16	3.51188	AT3G50520.1	Phosphoglycerate mutase family protein	LOC_Os12g04110.1	pentatricopeptide, putative, expressed
Sobic.010G090100	Suscepible vs Resistant	10 15	Lower in Susceptible	170	16.3333	9.24362	10.3333	2.33333	26.6667	4.84195	16	4	13.3333	1.76383	2.33333	2.33333	34.6667	8.11035	32.6667	4.05518	26	4.3589	5.33333	0.333333	29.6667	4.97773	26.3333	5.23874	AT1G22170.1	Phosphoglycerate mutase family protein	LOC_Os02g51590.1	phosphoglycerate mutase, putative, expressed
Sobic.005G219100	Suscepible vs Resistant	10 15	Higher in Susceptible	200	29.6667	10.1379	336.667	184.182	32.6667	13.8363	22.6667	5.36449	303.333	224.968	1522.67	549.053	42.3333	0.333333	51.6667	10.3655	79.3333	11.0202	1967	1079.39	95.3333	26.3397	77	20.9841	AT2G26560.1	phospholipase A 2A	LOC_Os08g37210.1	patatin, putative, expressed
Sobic.008G183400	Suscepible vs Resistant	5 10	Higher in Susceptible	198	1528.33	186.235	2417.67	226.285	37148	36847.5	148.333	25.8349	2821	205.78	3736.33	378.964	224	37.072	156	17.088	1686	196.981	1929.67	384.257	108	17.2143	131.667	12.252	AT3G15730.1	phospholipase D alpha 1	LOC_Os01g07760.1	phospholipase D, putative, expressed
Sobic.002G204500	Suscepible vs Resistant	10 15	Higher in Susceptible	200	16.3333	2.848	4.66667	4.66667	8.66667	0.333333	7.66667	3.84419	32.3333	9.02466	4.33333	2.18581	8	2	7.66667	5.36449	14	0.57735	10.3333	7.9652	8.33333	2.02759	3.33333	1.66667	AT1G52570.1	phospholipase D alpha 2	LOC_Os09g25390.1	phospholipase D, putative, expressed
Sobic.004G118400	Suscepible vs Resistant	5 10	Higher in Susceptible	198	241	23.6432	297.667	29.4863	51	5.03322	50	5.1316	207	31.8957	329.333	61.3361	53.3333	8.08977	57	8.14453	245.667	8.37324	352	99.3529	40.6667	4.09607	36.6667	4.05518	AT1G07780.1	phosphoribosylanthranilate isomerase 1	LOC_Os02g16630.1	tryptophan biosynthesis protein trpCF, putative, expressed
Sobic.003G007800	Suscepible vs Resistant	10	Higher in Susceptible	115	969.667	461.667	464.333	185.775	1328.67	1164.19	190.333	65.006	3254.67	1278.25	398	272.937	191.333	47.6317	470	168.114	448	140.008	416.333	225.98	158.333	44.2957	118.333	27.5096	AT4G28940.1	Phosphorylase superfamily protein	LOC_Os01g12940.1	phosphorylase domain containing protein, putative, expressed
Sobic.003G209800	Suscepible vs Resistant	10	Higher in Susceptible	115	29491.3	3352.45	15822.3	2155.27	22586.3	1463.09	20382.3	544.603	45017	17119.9	7217	2622.01	10538	2640.79	11447	2882.42	19538.7	1867.64	4827	2331.68	9935.67	2354.09	14939.7	2586.68	AT2G34420.1	photosystem II light harvesting complex gene B1B2	LOC_Os01g41710.1	chlorophyll A-B binding protein, putative, expressed
Sobic.003G209900	Suscepible vs Resistant	10	Higher in Susceptible	115	112701	1655.45	80545	3440.38	44186	3083.52	35377.7	2160.23	127853	40372	51204	15690	23644.7	4011.87	28216.3	3738.88	71410	7518.92	27398	11297.4	36685.3	9540.13	31385.3	4538.48	AT2G34420.1	photosystem II light harvesting complex gene B1B2	LOC_Os01g41710.1	chlorophyll A-B binding protein, putative, expressed
Sobic.006G120000	Suscepible vs Resistant	5	Higher in Susceptible	107	31.6667	2.02759	16.6667	2.848	5.33333	3.1798	5.66667	3.1798	21.3333	4.97773	6.33333	3.4801	12	3.05505	5	2.64575	14.6667	2.72845	8	4.16333	4	4	8	1.73205	AT1G67900.3	Phototropic-responsive NPH3 family protein	LOC_Os04g40100.1	BTBN11 - Bric-a-Brac, Tramtrack, Broad Complex BTB domain with non-phototropic hypocotyl 3 NPH3 domain, expressed
Sobic.008G148300	Suscepible vs Resistant	5 10 15	Lower in Susceptible	289	104.333	27.6546	72.6667	11.348	379.667	20.1687	490.333	51.9882	60.6667	8.08977	54	7	442.333	96.9989	500.667	29.6104	143	13.7477	88	30.348	560	23.0723	495.667	16.6966	AT3G19050.1	phragmoplast orienting kinesin 2	LOC_Os12g39980.1	kinesin motor domain containing protein, putative, expressed
Sobic.008G057300	Suscepible vs Resistant	5 10 15	Higher in Susceptible	392	100	23	152.333	12.2384	22.6667	4.33333	46.3333	9.38675	146	20.664	216.667	41.6106	25.3333	8.08977	29	4.58258	191.667	17.3333	210	17.2143	53	18.61	59.6667	2.18581	AT2G02220.1	phytosulfokin receptor 1	LOC_Os04g57630.1	phytosulfokine receptor precursor, putative, expressed
Sobic.008G034700	Suscepible vs Resistant	5	Higher in Susceptible	107	146	14.7309	66	8.88819	30.3333	5.89727	41	10.2144	99	21.2838	24	7.23418	36	1	42.3333	4.25572	139.333	5.54777	56	36.6606	55.3333	9.73539	60.6667	0.666667	AT3G44735.2	PHYTOSULFOKINE 3 PRECURSOR	LOC_Os12g05260.1	phytosulfokines precursor, putative, expressed
Sobic.008G034500	Suscepible vs Resistant	5 10 15	Higher in Susceptible	392	833.333	59.1448	506	27.2091	218.333	12.4677	225.333	16.1486	754.667	91.5903	430	120.67	178	29.2973	194.333	7.17248	631	24.173	668.333	114.211	193.667	15.1914	190	11.0151	AT3G44735.2	PHYTOSULFOKINE 3 PRECURSOR	LOC_Os12g05260.1	phytosulfokines precursor, putative, expressed
Sobic.008G106800	Suscepible vs Resistant	5 10 15	Higher in Susceptible	392	814.333	134.179	851	154.484	42.3333	5.78312	49.3333	8.64741	942.667	109.863	1191.67	237.386	36	6.1101	43	10.0167	638	58.5947	910	50.6392	18	2.88675	27.3333	1.20185	AT1G32100.1	pinoresinol reductase 1	LOC_Os12g16410.1	isoflavone reductase, putative, expressed
Sobic.001G209300	Suscepible vs Resistant	10 15	Higher in Susceptible	200	74.3333	15.9409	58.3333	13.2958	33.3333	5.36449	17.6667	4.97773	76.6667	17.6289	36.3333	2.4037	17.3333	2.96273	10.3333	1.45297	61.6667	10.6823	99	19	18.3333	6.00925	26	4.04145	AT2G15220.1	Plant basic secretory protein (BSP) family protein	LOC_Os10g34910.1	secretory protein, putative, expressed
Sobic.001G209200	Suscepible vs Resistant	5	Lower in Susceptible	131	32	9.29157	134	40.4475	102.667	36.8299	49.3333	14.4376	84	22.5019	157.667	19.6412	101.667	27.4853	74.3333	15.1033	156.333	73.0213	281.333	89.5197	130	35.7911	413.667	154.817	AT2G15220.1	Plant basic secretory protein (BSP) family protein	LOC_Os10g34910.1	secretory protein, putative, expressed
Sobic.010G171900	Suscepible vs Resistant	5 10 15	Higher in Susceptible	392	956.667	386.096	858.333	315.729	101.333	16.7962	79.3333	2.33333	2046.67	437.36	1291.33	342.562	126.667	10.9138	76.3333	9.82061	460.667	107.207	1127.33	548.189	60.6667	5.23874	41.6667	7.51295	AT5G21100.1	Plant L-ascorbate oxidase	LOC_Os06g37150.1	L-ascorbate oxidase precursor, putative, expressed
Sobic.006G239700	Suscepible vs Resistant	5	Higher in Susceptible	107	21.3333	1.85592	14.3333	2.72845	0	0	2	2	15	3.21455	5.33333	2.90593	3	3	4.66667	2.4037	20.3333	2.4037	14.3333	5.48736	0	0	0	0	AT3G50170.1	Plant protein of unknown function (DUF247)	LOC_Os05g10900.1	plant protein of unknown function domain containing protein, expressed
Sobic.001G393600	Suscepible vs Resistant	10	Higher in Susceptible	115	11.6667	3.1798	20.6667	0.666667	8	4.3589	10.3333	2.60342	20.6667	3.4801	34.3333	14.345	5	2.64575	0	0	23	2.51661	26.3333	5.36449	4.33333	2.33333	11.3333	2.02759	AT3G50170.1	Plant protein of unknown function (DUF247)	LOC_Os03g19700.1	plant protein of unknown function domain containing protein, expressed
Sobic.007G188500	Suscepible vs Resistant	10 15	Higher in Susceptible	200	51	6.1101	65	13.3167	21.6667	2.4037	43.6667	3.52767	64.3333	6.88799	55	16.8226	23.3333	0.333333	29	5.2915	40.6667	3.1798	68.6667	11.6667	25.3333	2.72845	33	3	AT3G50170.1	Plant protein of unknown function (DUF247)	LOC_Os08g42570.1	plant protein of unknown function domain containing protein, expressed
Sobic.009G005600	Suscepible vs Resistant	5 10 15	Lower in Susceptible	289	5.66667	2.848	2.66667	2.66667	49.3333	8.45248	52	9.29157	5.66667	2.96273	6.33333	3.28295	37.3333	6.43774	36.3333	4.37163	9.33333	2.33333	16	3.78594	48	8.96289	72.6667	4.33333	AT3G50180.1	Plant protein of unknown function (DUF247)	LOC_Os11g17720.1	plant protein of unknown function domain containing protein, expressed
Sobic.001G280700	Suscepible vs Resistant	5 10 15	Higher in Susceptible	392	103.667	20.0859	162.333	32.199	17.6667	4.25572	14	2.51661	95.6667	22.8206	106.667	21.881	9.66667	2.33333	10.3333	0.881917	74.6667	9.90511	108.333	26.9959	8.66667	2.02759	12.6667	3.84419	AT3G02610.1	Plant stearoyl-acyl-carrier-protein desaturase family protein	LOC_Os04g31070.1	acyl-desaturase, chloroplast precursor, putative, expressed
Sobic.003G218000	Suscepible vs Resistant	10 15	Higher in Susceptible	200	20	4.04145	24	2.64575	8.33333	1.45297	8.33333	1.20185	27	1.52753	15	5.68624	8.33333	2.33333	6.33333	0.881917	24.3333	2.90593	25.3333	3.92994	10.6667	1.76383	9.33333	0.881917	AT5G20030.1	Plant Tudor-like RNA-binding protein	LOC_Os02g11000.2	agenet domain containing protein, putative, expressed
Sobic.006G069050	Suscepible vs Resistant	5 10	Higher in Susceptible	198	33.6667	2.4037	38	3.60555	3.66667	1.85592	4.66667	2.4037	31.6667	2.66667	39.6667	6.69162	0	0	0	0	24.3333	3.38296	20	4.04145	0	0	2.66667	2.66667	AT3G54850.1	plant U-box 14	LOC_Os02g28720.1	spotted leaf 11, putative, expressed
Sobic.007G226500	Suscepible vs Resistant	5 10 15	Higher in Susceptible	392	587.333	41.9139	567.333	37.649	148	18.1475	109	16.4418	651.333	28.3686	528.667	52.6698	158.667	38.2376	119.667	25.7704	256.667	9.70109	189.667	25.1153	59.6667	8.95048	58	8.88819	AT5G42340.1	Plant U-Box 15	LOC_Os08g37570.1	spotted leaf 11, putative, expressed
Sobic.008G044300	Suscepible vs Resistant	10 15	Higher in Susceptible	200	7	4.3589	12.6667	4.40959	0	0	4	2	14	3.78594	13.3333	2.848	0	0	2	2	6	3.05505	12.3333	2.60342	0	0	4	2.08167	AT3G52450.1	plant U-box 22	LOC_Os12g06410.1	U-box domain-containing protein, putative, expressed
Sobic.004G302700	Suscepible vs Resistant	10 15	Lower in Susceptible	170	45	24.2693	11	2.88675	36.6667	19.2209	35.6667	10.9138	13	1.52753	10.3333	2.18581	40.6667	14.8361	71.6667	28.6667	31	4.16333	39	26.4071	79.3333	43.8799	54.3333	5.23874	AT2G45190.1	Plant-specific transcription factor YABBY family protein	LOC_Os02g42950.1	YABBY domain containing protein, putative, expressed
Sobic.005G110520	Suscepible vs Resistant	5 10	Higher in Susceptible	198	19	1.73205	16.6667	2.33333	0	0	0	0	17.3333	3.66667	7.33333	0.881917	2	2	1.66667	1.66667	18.3333	1.20185	12	2.64575	0	0	1.66667	1.66667	AT5G13760.1	Plasma-membrane choline transporter family protein	LOC_Os07g46240.1	choline transporter-related, putative, expressed
Sobic.006G248300	Suscepible vs Resistant	10 15	Higher in Susceptible	200	812.333	166.233	750.667	87.9571	276.333	30.683	255.333	27.0637	759	91.7406	924	330.07	170	38.5919	235.333	39.4814	599	40	820.667	228.649	173.333	31.9653	194	14.7309	AT3G22400.1	PLAT/LH2 domain-containing lipoxygenase family protein	LOC_Os03g49380.1	lipoxygenase, putative, expressed
Sobic.003G216300	Suscepible vs Resistant	5	Higher in Susceptible	107	38.3333	7.5351	44.3333	3.1798	10.6667	4.66667	10.6667	5.81187	24	11.5326	23	5.7735	13.3333	2.18581	19.6667	6.17342	76.6667	10.9747	64.6667	6.33333	21	2.51661	16.3333	0.881917	AT1G15520.1	pleiotropic drug resistance 12	LOC_Os01g42410.1	pleiotropic drug resistance protein, putative, expressed
Sobic.003G216166	Suscepible vs Resistant	5	Lower in Susceptible	131	11.6667	5.89727	18.3333	8.87568	49.6667	3.84419	46	3.60555	44	24.5561	92.6667	23.2116	44.6667	7.42369	40	7.2111	42	18.1475	96.3333	60.0342	44.3333	5.20683	108.667	31.8346	AT1G15520.1	pleiotropic drug resistance 12	LOC_Os01g42380.1	pleiotropic drug resistance protein, putative, expressed
Sobic.003G215600	Suscepible vs Resistant	10 15	Lower in Susceptible	170	5.33333	2.90593	4	2	26.3333	8.29324	19.6667	4.33333	0	0	2	2	25.3333	2.33333	19.6667	2.18581	4	2.08167	4.33333	2.33333	21.6667	1.20185	18	1.1547	AT1G15520.1	pleiotropic drug resistance 12	LOC_Os01g42380.1	pleiotropic drug resistance protein, putative, expressed
Sobic.010G247300	Suscepible vs Resistant	10	Higher in Susceptible	115	41.3333	19.8522	67.3333	21.1056	16.3333	2.848	16	4.16333	85.3333	8.68588	110	38.6307	23	5.50757	14.6667	0.333333	47.6667	3.71184	102.667	42.2387	5.66667	3.4801	20	6.50641	AT3G28510.1	P-loop containing nucleoside triphosphate hydrolases superfamily protein	LOC_Os06g48240.1	AAA ATPase, putative, expressed
Sobic.010G012200	Suscepible vs Resistant	10 15	Higher in Susceptible	200	89.6667	12.7192	104.667	19.4279	40.6667	2.72845	48	1.73205	89.6667	11.4649	113.667	27.552	26.6667	4.33333	28.6667	10.0885	44.3333	0.666667	92.6667	20.8513	24.3333	3.4801	34.6667	1.33333	AT2G16790.1	P-loop containing nucleoside triphosphate hydrolases superfamily protein
Sobic.001G362100	Suscepible vs Resistant	5 10 15	Lower in Susceptible	289	24.3333	2.96273	17.3333	4.91031	68.6667	5.4569	55.6667	2.02759	27	6.9282	24	3.78594	85	10.9697	61.6667	5.60753	38.3333	1.66667	22.3333	5.696	95.6667	7.31057	82	9	AT2G15730.1	P-loop containing nucleoside triphosphate hydrolases superfamily protein	LOC_Os03g24910.1	nodulation protein-related, putative, expressed
Sobic.010G160500	Suscepible vs Resistant	5 10 15	Lower in Susceptible	289	7.33333	1.33333	5.66667	3.1798	39.3333	10.6667	42.3333	3.84419	2.33333	2.33333	0	0	31.6667	3.33333	30.3333	1.45297	3.33333	1.66667	1.66667	1.66667	26	5.1316	28	1.52753	AT3G18600.1	P-loop containing nucleoside triphosphate hydrolases superfamily protein	LOC_Os03g58810.1	DEAD-box ATP-dependent RNA helicase, putative, expressed
Sobic.K044300	Suscepible vs Resistant	5	Higher in Susceptible	107	27.6667	4.25572	59	14.1067	0	0	2	2	15	1.52753	17.6667	5.696	3.66667	3.66667	5.66667	0.333333	20.3333	3.84419	9.33333	0.666667	4.66667	2.4037	12.3333	4.66667	AT4G02390.1	poly(ADP-ribose) polymerase	LOC_Os01g24940.1	poly synthetase 2-A, putative, expressed
Sobic.003G158900	Suscepible vs Resistant	5 10	Higher in Susceptible	198	791.667	111.387	675.333	66.5841	122.333	13.8724	113.667	8.95048	404	77.7839	281	125.065	97.6667	8.76229	126.667	8.56997	538	54.6016	232	78.4283	119.667	18.3515	80	1	AT4G02390.1	poly(ADP-ribose) polymerase	LOC_Os01g24940.1	poly synthetase 2-A, putative, expressed
Sobic.001G294600	Suscepible vs Resistant	5 10 15	Lower in Susceptible	289	10.6667	2.18581	14	2	33.3333	5.4569	30.3333	2.60342	9	1	5.33333	2.72845	27.3333	2.60342	27.3333	0.881917	8	1.52753	5.33333	2.66667	25.6667	6.93622	32	2.08167	AT5G51120.1	polyadenylate-binding protein 1	LOC_Os06g11620.1	RNA recognition motif containing protein, putative, expressed
Sobic.006G261500	Suscepible vs Resistant	10 15	Higher in Susceptible	200	2686	179.41	4785.33	210.097	866.667	98.7697	1114	34.9333	3025.33	501.143	9041	2101.05	588.333	45.9214	1040	45.6107	4365.67	453.281	16070.7	7039.84	1419.33	79.5327	2272.33	133.31	AT2G43020.1	polyamine oxidase 2	LOC_Os04g57550.1	amine oxidase, flavin-containing, domain containing protein, expressed
Sobic.009G002500	Suscepible vs Resistant	10 15	Higher in Susceptible	200	838.667	113.185	1186	440.786	7349921	7.34956e+06	592	123.208	761.667	233.555	738	285.213	171.667	51.531	481.333	102.681	281.667	49.4548	548.667	241.927	157	29.1376	316.333	11.2891	AT5G06860.1	polygalacturonase inhibiting protein 1	LOC_Os05g01430.1	polygalacturonase inhibitor 2 precursor, putative, expressed
Sobic.004G023300	Suscepible vs Resistant	5 10 15	Lower in Susceptible	289	14.3333	2.90593	15	2.08167	301.667	10.4934	311.667	10.9747	14	5.1316	7.66667	4.09607	238.333	20.8833	267.667	29.2252	11.3333	0.881917	1.66667	1.66667	218	36.6606	159.333	10.7445	AT1G64720.1	Polyketide cyclase/dehydrase and lipid transport superfamily protein	LOC_Os02g03230.1	membrane related protein CP5, putative, expressed
Sobic.003G134700	Suscepible vs Resistant	5 10 15	Lower in Susceptible	289	4.66667	4.66667	12	3.4641	288.667	6.83943	247.333	18.0954	7	4.04145	9.33333	1.45297	278.667	3.4801	278	17.3494	7.33333	5.04425	8	2.51661	302.333	16.8259	333.667	16.3843	AT5G07710.1	Polynucleotidyl transferase, ribonuclease H-like superfamily protein	LOC_Os10g26730.1	exonuclease, putative, expressed
Sobic.005G043800	Suscepible vs Resistant	5 10 15	Higher in Susceptible	392	39.3333	3.4801	30.6667	4.25572	0	0	2	2	19.6667	4.70225	23.6667	8.41295	0	0	0	0	38.6667	1.20185	30.6667	0.666667	0	0	0	0	AT2G16120.1	polyol/monosaccharide transporter 1	LOC_Os12g32940.1	transporter family protein, putative, expressed
Sobic.005G196300	Suscepible vs Resistant	10 15	Higher in Susceptible	200	37.3333	2.66667	37.3333	5.23874	17.6667	4.25572	17	2.51661	63.6667	9.76957	53.3333	7.35603	15	1	12.6667	3.1798	52.3333	1.85592	55.3333	12.6007	12	1.1547	12.3333	2.02759	AT3G18830.1	polyol/monosaccharide transporter 5	LOC_Os11g41850.1	transporter family protein, putative, expressed
Sobic.003G403700	Suscepible vs Resistant	5 10	Higher in Susceptible	198	3821	305.634	3598.67	116.535	851.667	81.5298	498	51.4198	5965.33	644.24	4143.67	728.061	837.667	56.3037	578.667	14.7234	3645.33	90.865	4184	864.84	521	15.1327	423.667	28.1681	AT4G05320.4	polyubiquitin 10	LOC_Os06g46770.1	ubiquitin family protein, putative, expressed
Sobic.007G006501	Suscepible vs Resistant	5	Lower in Susceptible	131	10	1.52753	6.66667	0.666667	36	4.72582	18.3333	1.33333	13	6.55744	3	3	31.3333	4.48454	23.3333	1.85592	6.66667	1.66667	0	0	15.6667	1.85592	14	1.52753	AT5G38280.1	PR5-like receptor kinase	LOC_Os01g49580.1	Protein kinase domain containing protein, expressed
Sobic.003G080700	Suscepible vs Resistant	5 10 15	Lower in Susceptible	289	54.3333	6.83943	90	6.02771	232.667	44.0921	249.333	21.6667	59.6667	18.4782	95.6667	26.2953	255.667	49.7672	227	12.49	54	2.51661	65	12.6623	224	9.64365	247.667	14.6211	AT5G38280.1	PR5-like receptor kinase	LOC_Os01g04570.2	Ser/Thr protein kinase, putative, expressed
Sobic.009G019100	Suscepible vs Resistant	5 10 15	Lower in Susceptible	289	34	6.4291	71.6667	11.7945	162.333	34.9396	188	16.1658	45.6667	11.5662	78.3333	12.441	143	39.3446	155.333	18.1873	125.667	8.17177	129.667	18.6667	364	24.2693	389.333	31.5454	AT5G38280.1	PR5-like receptor kinase	LOC_Os01g04480.1	expressed protein
Sobic.008G006300	Suscepible vs Resistant	5	Higher in Susceptible	107	32.6667	8.41295	23.6667	2.96273	10.6667	0.881917	14.6667	2.33333	32.3333	8.45248	16.6667	1.66667	21.6667	5.23874	11	0.57735	39	4.50925	17.3333	1.85592	9.33333	0.666667	9.33333	5.48736	AT5G01640.1	prenylated RAB acceptor 1.B5	LOC_Os11g01610.1	prenylated rab acceptor, putative, expressed
Sobic.005G071100	Suscepible vs Resistant	5 10 15	Lower in Susceptible	289	5.66667	3.1798	2	2	30	2.51661	25	1.52753	2	2	0	0	19.3333	1.20185	32.6667	4.91031	6.66667	0.881917	5.33333	2.90593	24.6667	2.4037	32	4.3589	AT1G07370.1	proliferating cellular nuclear antigen 1	LOC_Os02g56130.1	PCNA - Putative DNA replicative polymerase clamp, expressed
Sobic.002G236500	Suscepible vs Resistant	10 15	Lower in Susceptible	170	70.6667	10.8064	42	0.57735	171.667	3.66667	166.333	7.42369	37.6667	4.66667	35	4.3589	144	19.0788	158.667	12.441	61.3333	7.83865	44	6.65833	162.667	19.3764	137	14.5717	AT1G69020.1	Prolyl oligopeptidase family protein	LOC_Os09g29950.1	OsPOP19 - Putative Prolyl Oligopeptidase homologue, expressed
Sobic.003G060800	Suscepible vs Resistant	10 15	Lower in Susceptible	170	0	0	0	0	13.3333	3.38296	13.3333	2.33333	0	0	0	0	14	1.52753	14.6667	3.52767	0	0	0	0	8	2.08167	13	3.78594	AT1G22670.1	Protease-associated (PA) RING/U-box zinc finger family protein	LOC_Os08g01360.3	RING finger protein 13, putative, expressed
Sobic.004G028600	Suscepible vs Resistant	5 10 15	Higher in Susceptible	392	253.333	34.9968	455.333	30.7698	64	13.7477	83.6667	13.9563	328	33.1713	717	69.407	59.6667	13.1698	74.3333	0.333333	487.667	18.6667	865	216.543	108.667	15.5063	126	5.50757	AT5G25930.1	Protein kinase family protein with leucine-rich repeat domain	LOC_Os02g13430.1	receptor-like protein kinase 5 precursor, putative, expressed
Sobic.008G058600	Suscepible vs Resistant	5	Lower in Susceptible	131	0	0	2	2	17	3.05505	11	2.51661	0	0	0	0	4	2	7	4.3589	1.66667	1.66667	0	0	8.33333	3.33333	11.6667	1.76383	AT1G77280.1	Protein kinase protein with adenine nucleotide alpha hydrolases-like domain	LOC_Os12g07990.1	protein kinase family protein, putative, expressed
Sobic.003G233800	Suscepible vs Resistant	5	Higher in Susceptible	107	49	8.18535	44	3.05505	15.3333	4.84195	10.3333	2.18581	29	9.71253	21.3333	4.09607	11.6667	4.25572	2.66667	2.66667	10.3333	2.66667	4.33333	2.33333	2.33333	2.33333	1.66667	1.66667	AT1G23540.1	Protein kinase superfamily protein	LOC_Os03g37120.1	retrotransposon protein, putative, unclassified, expressed
Sobic.001G152600	Suscepible vs Resistant	10	Higher in Susceptible	115	20.6667	2.848	23	1.1547	13.6667	3.71184	10.3333	1.20185	33.6667	2.02759	31.3333	9.76957	12.3333	2.02759	13.3333	2.02759	20	3.21455	32	2.64575	12.6667	2.66667	8.66667	4.48454	AT5G63370.1	Protein kinase superfamily protein	LOC_Os09g27350.1	RIO1 family protein, expressed
Sobic.003G079900	Suscepible vs Resistant	10 15	Higher in Susceptible	200	88	2.51661	200.667	17.4005	41.6667	10.7445	60.3333	20.3497	137	12.7671	307.667	49.7404	38.6667	5.78312	28	6.02771	108.333	10.3976	339	86.0949	41.6667	4.8074	67.3333	3.92994	AT1G66910.1	Protein kinase superfamily protein	LOC_Os01g04520.1	Ser/Thr protein kinase, putative, expressed
Sobic.003G263400	Suscepible vs Resistant	10 15	Higher in Susceptible	200	54.3333	7.88106	86.3333	16.8556	25.6667	3.66667	23.3333	6.06447	88	3.78594	166.333	28.1089	24	1	22.6667	1.45297	82	3.05505	142	17.2143	24.6667	4.09607	27.6667	4.33333	AT5G38260.1	Protein kinase superfamily protein	LOC_Os01g49580.1	Protein kinase domain containing protein, expressed
Sobic.003G263500	Suscepible vs Resistant	5 10 15	Higher in Susceptible	392	31.3333	7.31057	54.3333	0.666667	4.66667	2.4037	8	4.16333	34.3333	5.66667	106.333	6.88799	6	3	7.33333	1.33333	32.6667	6.76593	77	19.2873	2.66667	2.66667	10.6667	2.848	AT1G66920.2	Protein kinase superfamily protein	LOC_Os01g49614.1	Protein kinase domain containing protein, expressed
Sobic.002G390700	Suscepible vs Resistant	10	Lower in Susceptible	95	39.3333	9.38675	16.6667	4.63081	27.3333	9.9387	35	16.7432	14	3.51188	2	2	55.3333	21.2315	56	8.5049	69.3333	1.85592	13.3333	7.51295	59	10.116	53.6667	7.35603	AT1G09450.1	Protein kinase superfamily protein	LOC_Os07g44360.1	serine/threonine-protein kinase Haspin, putative, expressed
Sobic.008G072400	Suscepible vs Resistant	10	Lower in Susceptible	95	47.3333	8.41295	31	0.57735	43.3333	1.33333	55.6667	6.66667	17	1	16.6667	2.33333	53.6667	5.36449	49.3333	3.52767	56.3333	9.6148	26.3333	3.71184	72	8.62168	63.6667	9.56266	AT1G09600.1	Protein kinase superfamily protein	LOC_Os12g10190.1	transposon protein, putative, unclassified, expressed
Sobic.009G063450	Suscepible vs Resistant	10	Lower in Susceptible	95	2	2	0	0	16.6667	5.60753	23.6667	0.333333	2	2	0	0	20	4.72582	27.3333	2.60342	0	0	0	0	40	1.52753	43.3333	3.52767	AT3G53840.1	Protein kinase superfamily protein	LOC_Os08g39220.1	OsWAK75 - OsWAK receptor-like protein kinase, expressed
Sobic.009G117100	Suscepible vs Resistant	10	Lower in Susceptible	95	129	42.7122	43.3333	15.0591	92.6667	35.4087	94.6667	34.9158	39.3333	4.33333	11	2.51661	119	41.7892	119.667	36.7892	133	8.66025	23.6667	7.68838	112	24.5425	118.333	27.7208	AT3G26700.1	Protein kinase superfamily protein	LOC_Os05g30820.1	protein kinase, putative, expressed
Sobic.005G182500	Suscepible vs Resistant	5	Lower in Susceptible	131	90	6.65833	222	43.5584	522	72.6659	790	208.644	110	71.0094	303	123.622	493.667	193.785	612.333	71.5177	109.333	6.33333	131.667	63.357	464.667	42.9509	531.333	18.5502	AT1G26970.1	Protein kinase superfamily protein	LOC_Os04g30040.2	jacalin-like lectin domain containing protein, expressed
Sobic.003G262700	Suscepible vs Resistant	5 10	Lower in Susceptible	161	2.66667	2.66667	4.66667	2.4037	45.3333	6.06447	51.6667	6.22718	0	0	4.33333	2.18581	67.6667	12.5742	70.6667	13.6789	1.66667	1.66667	0	0	75.3333	15.8149	70.3333	11.6237	AT5G38260.1	Protein kinase superfamily protein	LOC_Os01g49580.1	Protein kinase domain containing protein, expressed
Sobic.003G263001	Suscepible vs Resistant	5 10	Lower in Susceptible	161	53	5.50757	48	7.37111	245	43.8634	244.333	28.3686	55.6667	6.06447	46.6667	1.45297	251	38.223	205	16.9214	44	3.05505	32	5.50757	233.667	14.4029	248	20.4287	AT5G38260.1	Protein kinase superfamily protein	LOC_Os01g49614.1	Protein kinase domain containing protein, expressed
Sobic.003G389900	Suscepible vs Resistant	5 10	Lower in Susceptible	161	0	0	2	2	21	4	19.6667	3.28295	0	0	2	2	19.3333	4.09607	20.6667	4.91031	0	0	0	0	19.6667	1.45297	18	4.58258	AT3G59350.3	Protein kinase superfamily protein	LOC_Os01g67340.2	STRUBBELIG-RECEPTOR FAMILY 8 precursor, putative, expressed
Sobic.003G080800	Suscepible vs Resistant	5 10 15	Lower in Susceptible	289	18.3333	1.66667	24	4.04145	76.6667	10.6823	84.3333	12.9786	12.6667	1.20185	21	5.19615	56.6667	10.0885	77	11.0151	15	2	12	2	53	2.51661	59	0.57735	AT1G18390.2	Protein kinase superfamily protein	LOC_Os01g04470.1	expressed protein
Sobic.003G263300	Suscepible vs Resistant	5 10 15	Lower in Susceptible	289	2	2	3.66667	3.66667	36.6667	1.85592	59	1.73205	0	0	0	0	36.6667	7.62306	44	4.6188	0	0	1.66667	1.66667	77.6667	13.6667	72	11.6762	AT1G67000.1	Protein kinase superfamily protein	LOC_Os01g49614.1	Protein kinase domain containing protein, expressed
Sobic.004G155200	Suscepible vs Resistant	5 10 15	Higher in Susceptible	392	362.667	15.3007	346	23.7136	31.6667	10.3655	24.3333	4.17665	558.667	105.018	504.667	73.9016	29	3.21455	19	2.64575	268.333	17.9382	389	138.551	13.3333	2.02759	18.3333	0.333333	AT3G48660.1	Protein of unknown function (DUF 3339)	LOC_Os02g30470.1	expressed protein
Sobic.006G072501	Suscepible vs Resistant	5 10 15	Higher in Susceptible	392	27	2.51661	36.6667	6.48931	0	0	2.66667	2.66667	20.6667	0.333333	30.3333	5.78312	0	0	2	2	39	1	51.6667	6.33333	0	0	0	0	AT5G22350.1	Protein of unknown function (DUF1022)	LOC_Os02g33230.1	nucleoside-diphosphate-sugar epimerase, putative, expressed
Sobic.008G026700	Suscepible vs Resistant	5 10 15	Higher in Susceptible	392	467.667	72.6185	232.333	20.4641	37.3333	11.1405	20	5.1316	321.333	38.7829	79.3333	15.3442	12.3333	4.09607	15	0.57735	223.667	2.33333	84.6667	29.79	14	5.50757	7.66667	2.66667	AT3G08600.1	Protein of unknown function (DUF1191)	LOC_Os11g02630.1	expressed protein
Sobic.005G220900	Suscepible vs Resistant	5 10	Higher in Susceptible	198	991.667	130.54	902.667	291.451	19.3333	15.0591	22.3333	14.678	1793.33	275.53	1556	418.575	20	10.4083	26	7.81025	766.333	140.055	576	99.8599	2.66667	2.66667	4.33333	2.33333	AT1G13480.1	Protein of unknown function (DUF1262)	LOC_Os08g31880.1	expressed protein
Sobic.005G217900	Suscepible vs Resistant	5	Lower in Susceptible	131	860	298.634	2164.33	715.557	3750	1275.52	2003.67	561.589	3035	435.766	4359.33	916.681	4399.67	847.588	3793.67	1234.68	3368	679.02	5568.33	401.763	1923.67	271.859	4930.67	1491.45	AT3G13510.1	Protein of Unknown Function (DUF239)	LOC_Os07g38590.1	carboxyl-terminal peptidase, putative, expressed
Sobic.010G009600	Suscepible vs Resistant	5 10	Higher in Susceptible	198	76.6667	15.2133	63.3333	3.4801	28	1.73205	22	4.04145	71.3333	6.11919	60.3333	6.00925	22.6667	1.33333	25.3333	3.84419	83	0.57735	69.6667	6.17342	34.6667	8.98765	19.3333	2.02759	AT1G65760.1	Protein of unknown function (DUF295)	LOC_Os06g02110.1	OsFBX182 - F-box domain containing protein, expressed
Sobic.005G179500	Suscepible vs Resistant	5 10 15	Higher in Susceptible	392	214	20.2237	249	33.126	5	5	9	1	387	48.9524	332.333	84.8378	8	1	16	2	85.3333	5.23874	84.6667	14.8474	10.6667	0.666667	11	2.3094	AT5G55150.1	Protein of unknown function (DUF295)	LOC_Os01g34630.1	retrotransposon protein, putative, Ty1-copia subclass, expressed
Sobic.002G418900	Suscepible vs Resistant	5	Lower in Susceptible	131	66.3333	21.5278	600.333	374.055	233.333	47.1074	259.333	75.0674	71	21.5484	2948.33	2858.33	229.667	14.2517	84	2.88675	106.333	47.0331	201	39.7157	403.667	75.9217	115.667	9.33333	AT2G46380.1	Protein of unknown function (DUF3133)	LOC_Os07g48280.1	expressed protein
Sobic.002G122800	Suscepible vs Resistant	5	Higher in Susceptible	107	43.3333	7.5351	50.3333	6.11919	16.3333	3.52767	51	23.516	33	2.64575	65	5.56776	19	4.16333	24.3333	6.9602	37.6667	3.71184	37.6667	10.0885	17.3333	3.71184	20	6.35085	AT1G06515.1	Protein of unknown function (DUF3317)	LOC_Os07g26550.1	expressed protein
Sobic.K044404	Suscepible vs Resistant	5 10 15	Higher in Susceptible	392	54.3333	12.1701	51.3333	11.3333	0	0	2	2	47	2.08167	47.3333	7.83865	2	2	4.66667	2.4037	39.6667	4.66667	40.6667	8.17177	0	0	1.66667	1.66667	AT2G37860.3	Protein of unknown function (DUF3411)	LOC_Os04g44290.1	expressed protein
Sobic.004G185500	Suscepible vs Resistant	5 10	Higher in Susceptible	198	209.667	7.31057	195	18.8768	40	4.16333	31.3333	2.18581	153.667	26.5225	150	26.3122	41.6667	3.38296	38.3333	3.52767	174	2.64575	152	9.0185	49.3333	4.84195	44	7.54983	AT3G20300.1	Protein of unknown function (DUF3537)	LOC_Os02g35830.1	extracellular ligand-gated ion channel, putative, expressed
Sobic.006G194100	Suscepible vs Resistant	10 15	Higher in Susceptible	200	51.6667	0.333333	45.6667	8.68588	34	5.03322	46.3333	7.35603	81	24.0069	105	28.0951	28	6.4291	25.3333	3.84419	36	5.50757	42.3333	2.60342	32.3333	5.60753	29.6667	4.17665	AT5G47060.1	Protein of unknown function (DUF581)	LOC_Os04g49670.1	DUF581 domain containing protein, expressed
Sobic.002G211000	Suscepible vs Resistant	5 10 15	Higher in Susceptible	392	8453	578.069	5895	253.54	1003.67	254.523	759.667	128.984	14543.7	4069.54	5557.67	723.532	1310.33	151.631	567.333	21.4269	6350	761.824	3596	1207.7	612.667	99.6232	441.333	53.0482	AT1G74940.1	Protein of unknown function (DUF581)	LOC_Os09g26370.1	DUF581 domain containing protein, expressed
Sobic.001G481100	Suscepible vs Resistant	5	Lower in Susceptible	131	19.6667	6.33333	81.6667	29.4468	113.667	29.7228	71	30.4357	33.3333	6.83943	104	57.5876	30	9.16515	14	1.52753	31	16	34	4.58258	111.667	40.2175	16.3333	3.71184	AT5G20700.1	Protein of unknown function (DUF581)	LOC_Os03g08520.1	DUF581 domain containing protein, expressed
Sobic.006G194000	Suscepible vs Resistant	5	Lower in Susceptible	131	10	1	11.3333	2.66667	33.3333	5.23874	33	2.51661	9.33333	6.17342	8	1.1547	22.6667	2.60342	17.6667	5.20683	3.33333	1.66667	1.66667	1.66667	19	2.88675	26.3333	2.33333	AT5G47060.1	Protein of unknown function (DUF581)	LOC_Os04g49670.1	DUF581 domain containing protein, expressed
Sobic.006G194200	Suscepible vs Resistant	5 10 15	Lower in Susceptible	289	36	2.3094	51.3333	6.98411	510.667	6.33333	625.333	53.9918	64.3333	15.3007	103	22.8692	475.667	59.6778	448.333	9.9387	18	1.73205	46	5.03322	301	30.6431	298.333	19.0992	AT5G47060.1	Protein of unknown function (DUF581)	LOC_Os04g49670.1	DUF581 domain containing protein, expressed
Sobic.008G170250	Suscepible vs Resistant	5	Higher in Susceptible	107	39	3.51188	14.6667	4.17665	9	4.50925	9.66667	1.66667	26.3333	8.68588	11.3333	5.78312	16.6667	3.4801	13.6667	0.881917	33.3333	3.1798	19	11.9304	15	4.16333	15.3333	3.1798	AT5G45530.1	Protein of unknown function (DUF594)	LOC_Os05g46690.1	expressed protein
Sobic.005G196600	Suscepible vs Resistant	5 10	Higher in Susceptible	198	65	5.50757	37	4.93288	17.3333	1.45297	14.3333	1.20185	57	13.4536	27.3333	5.89727	15.3333	2.33333	15.6667	0.881917	62	5.03322	33.3333	11.2596	12.6667	1.33333	13.3333	2.60342	AT5G45470.1	Protein of unknown function (DUF594)	LOC_Os07g17050.1	retrotransposon protein, putative, unclassified, expressed
Sobic.010G128200	Suscepible vs Resistant	10 15	Higher in Susceptible	200	23.6667	6.56591	18	6.50641	10.3333	2.33333	10.3333	0.881917	27.3333	3.1798	6	3.05505	8.66667	2.66667	9	4.93288	30.6667	4.25572	13.3333	6.76593	11.3333	1.33333	10.3333	2.72845	AT5G45540.1	Protein of unknown function (DUF594)	LOC_Os10g05410.1	expressed protein
Sobic.002G064600	Suscepible vs Resistant	5 10 15	Higher in Susceptible	392	30.3333	9.56266	17.3333	1.85592	0	0	3	3	27.3333	3.92994	7.66667	4.97773	0	0	1.66667	1.66667	28	3	19	9.71253	0	0	0	0	AT4G19090.1	Protein of unknown function (DUF594)	LOC_Os07g17050.1	retrotransposon protein, putative, unclassified, expressed
Sobic.006G268700	Suscepible vs Resistant	5 10 15	Higher in Susceptible	392	29.3333	2.60342	23.3333	5.04425	8.33333	1.76383	4.66667	2.4037	37	1.1547	10.3333	2.60342	2	2	3.66667	1.85592	37.3333	4.48454	12.6667	7.51295	11	1.52753	8	1.52753	AT5G45470.1	Protein of unknown function (DUF594)	LOC_Os01g42340.1	expressed protein
Sobic.008G170400	Suscepible vs Resistant	5 10 15	Lower in Susceptible	289	11.3333	3.92994	13.3333	2.33333	38	8.66025	37	10.583	6.33333	3.75648	6.33333	3.1798	43.3333	9.33333	47.6667	2.72845	10	2.51661	7.66667	1.45297	53.6667	7.85988	61.6667	4.48454	AT5G45540.1	Protein of unknown function (DUF594)	LOC_Os04g14540.1	expressed protein
Sobic.006G018900	Suscepible vs Resistant	10	Higher in Susceptible	115	69.3333	7.17248	58.6667	5.20683	30.6667	9.20748	14.6667	4.37163	77.6667	5.78312	64	8.88819	25.3333	4.33333	34.6667	2.90593	70.6667	4.37163	90.3333	4.09607	28.3333	1.20185	24.3333	2.18581	AT3G23160.1	Protein of unknown function (DUF668)	LOC_Os04g08764.1	avr9/Cf-9 rapidly elicited protein 137, putative, expressed
Sobic.003G065700	Suscepible vs Resistant	5	Higher in Susceptible	107	28.6667	10.651	7.33333	1.33333	0	0	4	2	8.66667	4.66667	6.33333	3.1798	3	3	0	0	23.3333	4.70225	18.3333	9.70109	3.66667	1.85592	0	0	AT3G09110.1	Protein of unknown function (DUF674)	LOC_Os01g06140.1	expressed protein
Sobic.003G066900	Suscepible vs Resistant	5 10 15	Higher in Susceptible	392	79.3333	4.33333	59.3333	13.3708	2	2	2.66667	2.66667	103	16.0416	35	5.19615	0	0	2	2	58.6667	4.37163	36.6667	6.38575	0	0	0	0	AT3G09140.1	Protein of unknown function (DUF674)	LOC_Os01g06030.1	expressed protein
Sobic.010G158200	Suscepible vs Resistant	10 15	Higher in Susceptible	200	44	5.1316	33.3333	4.63081	25.6667	1.45297	31.6667	10.3976	52.6667	16.6767	33.3333	11.348	19.6667	4.05518	20.6667	1.85592	38	1.1547	25.6667	4.05518	17.6667	3.92994	31	5.1316	AT4G18425.1	Protein of unknown function (DUF679)	LOC_Os06g24490.1	expressed protein
Sobic.010G126600	Suscepible vs Resistant	5	Lower in Susceptible	131	17.3333	3.71184	15	2.08167	49.6667	3.75648	44.6667	2.90593	16.3333	2.848	14	4.3589	38.3333	5.04425	35	8.544	13.3333	2.90593	13.3333	1.85592	21.6667	2.96273	28.3333	2.60342	AT4G18425.1	Protein of unknown function (DUF679)	LOC_Os01g29240.1	expressed protein
Sobic.007G005600	Suscepible vs Resistant	5 10 15	Lower in Susceptible	289	12.6667	0.881917	9.33333	2.4037	82	6.65833	71.3333	12.7192	11.6667	2.60342	10.6667	2.60342	73.6667	7.2188	54.6667	7.85988	7	1	3.66667	1.85592	50.3333	6.43774	57.3333	1.76383	AT4G24310.1	Protein of unknown function (DUF679)	LOC_Os08g01530.1	expressed protein
Sobic.002G088900	Suscepible vs Resistant	10 15	Higher in Susceptible	200	21.6667	6.22718	41	10.116	19	5.50757	23.3333	3.52767	42.3333	7.12585	105.667	58.0153	15	2.64575	14.6667	1.76383	73	20.2978	147	52.5959	21.3333	2.02759	57.3333	2.96273	AT1G09310.1	Protein of unknown function, DUF538	LOC_Os07g02880.1	DUF538 domain containing protein, putative, expressed
Sobic.003G191400	Suscepible vs Resistant	10 15	Higher in Susceptible	200	12.6667	1.20185	11.3333	3.52767	5.66667	0.333333	0	0	16.6667	3.75648	16.6667	5.36449	2	2	1.66667	1.66667	18.6667	3.84419	22.3333	2.848	1.66667	1.66667	2.66667	2.66667	AT3G08890.2	Protein of unknown function, DUF538	LOC_Os01g38500.1	DUF538 domain containing protein, putative, expressed
Sobic.005G088300	Suscepible vs Resistant	10 15	Higher in Susceptible	200	24.3333	3.52767	13.6667	0.881917	7.66667	0.881917	5	2.64575	32	5.7735	6.33333	0.333333	3	3	2.66667	2.66667	25.3333	2.60342	1.66667	1.66667	7	0.57735	5.33333	3.1798	AT4G02360.1	Protein of unknown function, DUF538	LOC_Os11g13720.1	expressed protein
Sobic.010G117700	Suscepible vs Resistant	10 15	Higher in Susceptible	200	4	2	15.6667	2.60342	0	0	0	0	11	5.50757	30.3333	9.40449	0	0	0	0	19.6667	4.66667	35	2.88675	0	0	0	0	AT1G09310.1	Protein of unknown function, DUF538	LOC_Os07g02900.1	DUF538 domain containing protein, putative, expressed
Sobic.004G204600	Suscepible vs Resistant	5 10 15	Higher in Susceptible	392	47.3333	2.33333	35.6667	3.75648	11.6667	4.25572	11.3333	2.848	38.3333	6.33333	30.6667	2.18581	8.33333	4.17665	17.6667	2.66667	53	3.21455	39.6667	2.18581	15.6667	0.881917	13.6667	1.20185	AT4G31860.1	Protein phosphatase 2C family protein	LOC_Os02g38710.1	protein phosphatase 2C containing protein, expressed
Sobic.006G073100	Suscepible vs Resistant	5 10 15	Higher in Susceptible	392	56.3333	5.20683	73.3333	3.84419	0	0	4.66667	2.4037	37.6667	9.70109	64.3333	10.5251	0	0	1.66667	1.66667	53	6.4291	50	3.05505	0	0	0	0	AT4G31860.1	Protein phosphatase 2C family protein	LOC_Os04g42260.1	protein phosphatase 2C, putative, expressed
Sobic.004G279200	Suscepible vs Resistant	10 15	Lower in Susceptible	170	37.3333	7.75314	22	4.04145	29.6667	14.6553	29	2.64575	14.3333	0.881917	17	4	44	11.0151	36.6667	8.96908	26.3333	1.20185	32.3333	10.3976	26.3333	8.25295	26.6667	7.05534	AT5G06750.1	Protein phosphatase 2C family protein	LOC_Os02g46080.1	protein phosphatase 2C, putative, expressed
Sobic.002G360701	Suscepible vs Resistant	5 10 15	Higher in Susceptible	392	75	7	74.3333	5.20683	0	0	4	2	43.3333	17.4197	61	10.4403	2	2	4.66667	2.4037	40.6667	5.84047	46.6667	2.60342	0	0	2.66667	2.66667	AT3G11410.1	protein phosphatase 2CA	LOC_Os09g15670.1	protein phosphatase 2C, putative, expressed
Sobic.004G169501	Suscepible vs Resistant	5 10	Higher in Susceptible	198	248.333	4.40959	237	19.4251	8	2.51661	8.66667	5.92546	150	76.5593	188.333	45.4325	0	0	9.66667	3.66667	206.667	11.0955	135	4.6188	0	0	1.66667	1.66667	AT3G04830.1	Protein prenylyltransferase superfamily protein	LOC_Os02g03470.1	tetratricopeptide repeat containing protein, putative, expressed
Sobic.005G060700	Suscepible vs Resistant	5 10 15	Lower in Susceptible	289	9.66667	1.85592	13.3333	4.05518	229	36.5103	314	48.4458	11.3333	8.08977	15	4.16333	397.667	110.721	359.333	48.5467	9	2.08167	8.66667	1.33333	448.333	71.1087	456	46.0579	AT1G11300.1	protein serine/threonine kinases;protein kinases;ATP binding;sugar binding;kinases;carbohydrate binding	LOC_Os11g10640.1	protein kinase domain containing protein, expressed
Sobic.009G047400	Suscepible vs Resistant	5	Higher in Susceptible	107	20.3333	2.02759	34.3333	6.56591	1.66667	1.66667	9	1.52753	17.3333	6.38575	35.3333	3.84419	12.6667	2.02759	5.33333	2.90593	18.3333	4.25572	39.6667	8.21246	10.6667	0.666667	8	1.52753	AT5G37870.1	Protein with RING/U-box and TRAF-like domains	LOC_Os05g06060.1	E3 ubiquitin-protein ligase SINA-like 2, putative, expressed
Sobic.003G091800	Suscepible vs Resistant	10 15	Higher in Susceptible	200	10	5.1316	5.66667	2.848	0	0	0	0	13.6667	2.72845	11	0.57735	0	0	2	2	6	3.05505	0	0	0	0	0	0	AT5G62800.1	Protein with RING/U-box and TRAF-like domains	LOC_Os01g03170.1	seven in absentia protein family protein, expressed
Sobic.003G091200	Suscepible vs Resistant	5 10 15	Higher in Susceptible	392	42	1.1547	32	0.57735	11.3333	2.848	14.3333	0.881917	21	7	30	6.1101	7.66667	1.66667	11.6667	1.20185	26.3333	2.72845	29	8.0829	9	1	13	4.16333	AT5G37870.1	Protein with RING/U-box and TRAF-like domains	LOC_Os01g03290.1	seven in absentia protein family domain containing protein, expressed
Sobic.009G047700	Suscepible vs Resistant	10 15	Lower in Susceptible	170	9.33333	1.66667	6.33333	3.28295	27.6667	5.23874	22.6667	4.91031	2.33333	2.33333	0	0	21	1	23.3333	3.1798	10	0.57735	0	0	22	2.51661	17.3333	0.666667	AT5G37870.1	Protein with RING/U-box and TRAF-like domains	LOC_Os05g06060.1	E3 ubiquitin-protein ligase SINA-like 2, putative, expressed
Sobic.003G282500	Suscepible vs Resistant	5	Higher in Susceptible	107	41.6667	23.3833	14.3333	0.881917	2	2	2.66667	2.66667	18	5.56776	2.33333	2.33333	4	4	11	4.04145	29.6667	2.90593	20.6667	16.8259	19.3333	10.8372	3.66667	3.66667	AT2G42840.1	protodermal factor 1	LOC_Os01g52690.1	retrotransposon protein, putative, unclassified, expressed
Sobic.008G036300	Suscepible vs Resistant	5	Higher in Susceptible	107	120.667	14.7686	76	1.73205	38.3333	4.48454	28	2	85.3333	10.8372	96.6667	12.252	32.3333	4.05518	26.3333	7.88106	79.6667	21.1844	64	13.6504	14.6667	1.76383	20.3333	1.45297	AT3G52820.1	purple acid phosphatase 22	LOC_Os11g05400.1	Ser/Thr protein phosphatase family protein, putative, expressed
Sobic.008G037000	Suscepible vs Resistant	10	Higher in Susceptible	115	16.6667	3.1798	18	1.52753	2	2	5.66667	3.1798	18	4.3589	18	4.50925	2	2	1.66667	1.66667	9.66667	0.881917	12.6667	1.45297	1.66667	1.66667	13.3333	1.66667	AT3G52780.1	Purple acid phosphatases superfamily protein	LOC_Os12g05540.1	Ser/Thr protein phosphatase family protein, putative, expressed
Sobic.008G140300	Suscepible vs Resistant	10 15	Higher in Susceptible	200	42.6667	23.7791	60	22.8546	17	8.62168	81.6667	61.1837	31.3333	6.38575	89.3333	14.8474	10	1	24.6667	2.96273	10.6667	2.02759	46.3333	7.88106	6	3.78594	12.6667	1.20185	AT1G13750.1	Purple acid phosphatases superfamily protein	LOC_Os12g38750.2	nucleotide pyrophosphatase/phosphodiesterase, putative, expressed
Sobic.005G048500	Suscepible vs Resistant	5 10 15	Higher in Susceptible	392	89.6667	10.3333	66.6667	5.36449	11.3333	1.85592	13.3333	1.66667	70	12.0554	64	7.76745	4	4	5.66667	2.848	73	4.50925	42.6667	2.848	0	0	6	1	AT1G58350.1	Putative serine esterase family protein	LOC_Os12g06800.1	serine esterase family protein, putative, expressed
Sobic.001G400700	Suscepible vs Resistant	5	Lower in Susceptible	131	32	7.57188	97	17.1561	102.667	34.08	70.6667	15.8149	59	6.35085	168.333	7.75314	76.3333	2.96273	58.3333	4.48454	98.6667	49.7639	204.333	65.3512	44	3.4641	106.667	31.0609	AT2G40330.1	PYR1-like 6	LOC_Os03g18850.1	pathogenesis-related Bet v I family protein, putative, expressed
Sobic.001G255300	Suscepible vs Resistant	10 15	Higher in Susceptible	200	185	69.2917	74	25.4231	137.333	73.2492	38.3333	9.76957	321.667	126.571	14.6667	4.48454	73.3333	16.5764	64.3333	13.7396	114	21.2211	12.3333	5.04425	62.3333	6.43774	55.3333	3.66667	AT2G20340.1	Pyridoxal phosphate (PLP)-dependent transferases superfamily protein	LOC_Os10g26110.1	decarboxylase, putative, expressed
Sobic.009G192600	Suscepible vs Resistant	10 15	Higher in Susceptible	200	21.3333	1.85592	27.6667	3.66667	24.6667	6.06447	6.66667	4.05518	33	4.3589	38	16.5025	11	3.60555	4.66667	2.4037	19.3333	0.333333	14.6667	3.52767	23.6667	7.79601	3.33333	1.66667	AT2G20340.1	Pyridoxal phosphate (PLP)-dependent transferases superfamily protein	LOC_Os05g43510.1	decarboxylase, putative, expressed
Sobic.007G035000	Suscepible vs Resistant	10 15	Lower in Susceptible	170	0	0	10.3333	1.45297	11.6667	7.62306	12.6667	6.74125	9	1	65.3333	9.17121	27.3333	9.17121	16	9.0185	0	0	276	261.634	16.3333	4.17665	35.3333	1.66667	AT2G20340.1	Pyridoxal phosphate (PLP)-dependent transferases superfamily protein	LOC_Os08g04540.1	decarboxylase, putative, expressed
Sobic.003G209600	Suscepible vs Resistant	10	Higher in Susceptible	115	48.6667	0.881917	41.6667	7.83865	28	3.4641	27	3.05505	76.3333	23.8491	47	8.0829	22.6667	4.48454	25	2.64575	22	2	29.3333	5.33333	14.6667	1.76383	16.6667	1.20185	AT4G29530.1	Pyridoxal phosphate phosphatase-related protein	LOC_Os01g41660.1	phosphoethanolamine/phosphocholine phosphatase, putative, expressed
Sobic.002G284000	Suscepible vs Resistant	10	Higher in Susceptible	115	16.6667	7.05534	3.66667	3.66667	0	0	2	2	36.6667	10.6823	4.33333	2.18581	2	2	0	0	14.3333	2.60342	2	2	0	0	0	0	AT5G11880.1	Pyridoxal-dependent decarboxylase family protein	LOC_Os09g37120.1	pyridoxal-dependent decarboxylase protein, putative, expressed
Sobic.007G143600	Suscepible vs Resistant	5	Lower in Susceptible	131	4	2	8.33333	1.45297	24	1.52753	23.3333	2.60342	10.3333	2.02759	7.33333	0.881917	23	0	25	4.04145	6	3.05505	5	2.88675	33.3333	1.66667	30.3333	3.28295	AT5G14800.1	pyrroline-5- carboxylate (P5C) reductase	LOC_Os01g71990.1	pyrroline-5-carboxylate reductase, putative, expressed
Sobic.003G351150	Suscepible vs Resistant	10 15	Higher in Susceptible	200	10	2.08167	10.6667	2.60342	10	7.63763	12.3333	4.09607	19.6667	14.5182	20	3.60555	4	2	6.33333	3.28295	8	1.73205	15.6667	5.78312	1.66667	1.66667	1.66667	1.66667	AT1G16920.1	RAB GTPase homolog A1B	LOC_Os06g35814.1	ras-related protein, putative, expressed
Sobic.001G434800	Suscepible vs Resistant	10 15	Higher in Susceptible	200	20.3333	3.71184	44.3333	6.69162	11.3333	5.78312	4	2	20.6667	3.84419	42.3333	11.6094	4	2	2.66667	2.66667	30.3333	3.28295	54.6667	16.0243	7.33333	2.33333	4.33333	2.33333	AT1G75250.1	RAD-like 6	LOC_Os03g14810.1	MYB-like transcription factor DIVARICATA, putative, expressed
Sobic.003G319400	Suscepible vs Resistant	10	Higher in Susceptible	115	20	4.50925	42.3333	1.76383	11	3.4641	23.3333	3.1798	26	4.58258	48.3333	2.60342	8	1	14.3333	1.45297	24.3333	1.20185	46.3333	11.392	9.66667	1.20185	22.3333	4.40959	AT4G21380.1	receptor kinase 3	LOC_Os01g57510.1	receptor protein kinase, putative, expressed
Sobic.001G237100	Suscepible vs Resistant	10 15	Higher in Susceptible	200	23.6667	4.63081	31.6667	6.64162	21	10.6927	16.3333	4.09607	41	7.2111	62.6667	14.3333	16.3333	1.85592	24.6667	8.19214	32.3333	4.33333	82.3333	31.9705	16.3333	2.4037	39.6667	5.04425	AT2G37710.1	receptor lectin kinase	LOC_Os10g30530.1	lectin-like receptor kinase, putative, expressed
Sobic.010G124800	Suscepible vs Resistant	10 15	Higher in Susceptible	200	39.6667	8.21246	68.6667	2.33333	20	6.80686	19.3333	3.38296	52.3333	4.66667	104	7.50555	20	2.64575	23.3333	3.1798	131.667	12.7715	441	106.444	37.6667	2.90593	47.6667	7.83865	AT2G37710.1	receptor lectin kinase	LOC_Os07g03810.1	lectin-like receptor kinase 7, putative, expressed
Sobic.003G059100	Suscepible vs Resistant	5 10	Lower in Susceptible	161	0	0	5.33333	2.66667	60.3333	1.66667	76	7.57188	3.33333	3.33333	5	2.64575	85.6667	9.90511	102.667	3.4801	5.66667	0.666667	0	0	91	5.50757	93	5	AT2G32680.1	receptor like protein 23	LOC_Os01g06900.1	verticillium wilt disease resistance protein Ve2, putative, expressed
Sobic.004G103400	Suscepible vs Resistant	10	Higher in Susceptible	115	27.6667	2.18581	56	9.64365	13	4	11	1.52753	47.3333	7.33333	78.3333	19.7512	17	6.65833	19.3333	1.20185	50.3333	5.4569	112.333	24.835	21.3333	1.33333	23.3333	4.70225	AT3G11010.1	receptor like protein 34	LOC_Os01g04070.1	verticillium wilt disease resistance protein, putative, expressed
Sobic.008G076600	Suscepible vs Resistant	10	Higher in Susceptible	115	13	6.50641	41	7.81025	5.33333	2.90593	2	2	29	3.4641	48.6667	14.1931	9	0	1.66667	1.66667	29.3333	4.37163	43.3333	11.0955	9	2.64575	5.33333	2.72845	AT1G45616.1	receptor like protein 6	LOC_Os12g11370.1	verticillium wilt disease resistance protein, putative, expressed
Sobic.003G058001	Suscepible vs Resistant	5 10	Lower in Susceptible	161	21	3.78594	18.6667	5.23874	757	114.409	531	79.7392	6.33333	3.4801	10.3333	1.45297	957.667	186.204	739	82.803	18.6667	4.66667	12.3333	3.38296	429.333	67.8487	234.667	38.5155	AT1G47890.1	receptor like protein 7	LOC_Os01g06730.1	verticillium wilt disease resistance protein, putative, expressed
Sobic.007G221201	Suscepible vs Resistant	5 10 15	Higher in Susceptible	392	38.6667	6.64162	26.6667	1.66667	11.3333	0.333333	17.6667	3.1798	38	7.81025	36.6667	11.9768	12	0.57735	14.6667	1.45297	32.6667	3.52767	35.3333	2.18581	10.6667	1.45297	15	1.52753	AT3G17840.1	receptor-like kinase 902	LOC_Os03g12250.1	atypical receptor-like kinase MARK, putative, expressed
Sobic.009G074250	Suscepible vs Resistant	5 10 15	Lower in Susceptible	289	8.33333	1.45297	11.3333	5.696	206.667	20.8673	195.667	9.9387	2.33333	2.33333	4.33333	2.18581	133	11	160.667	9.24362	4.33333	2.33333	3.66667	1.85592	118.667	4.66667	136.333	4.8074	AT5G64760.2	regulatory particle non-ATPase subunit 5B	LOC_Os03g63430.1	proteasome subunit, putative, expressed
Sobic.002G212000	Suscepible vs Resistant	5 10	Higher in Susceptible	198	9329.67	2297.79	16156	3516	417.667	50.67	478.333	104.953	11480.3	1633.42	19065	3738.47	465	69.371	450.333	81.8461	13120.7	1108.06	20014.3	3129.69	475	78.5005	436	77.1384	AT1G53910.1	related to AP2 12	LOC_Os09g26420.5	AP2 domain containing protein, expressed
Sobic.007G188701	Suscepible vs Resistant	5	Higher in Susceptible	107	20.6667	8.00694	43.6667	15.6773	0	0	18	6.65833	15.6667	5.48736	84.3333	16.6966	6	3	8	1.52753	10.6667	4.70225	101.333	15.3007	2.66667	2.66667	6.66667	0.881917	AT5G13330.1	related to AP2 6l	LOC_Os04g32620.1	ethylene-responsive transcription factor ERF114, putative, expressed
Sobic.004G180400	Suscepible vs Resistant	10	Lower in Susceptible	95	41	10.504	25	7.54983	36	18.2483	39	12.0968	17.3333	2.02759	14.3333	4.33333	45	15.3948	55.3333	5.54777	47.3333	2.90593	36.3333	16.5059	50	16.3707	59.3333	7.2188	AT1G67590.1	Remorin family protein	LOC_Os03g02840.1	remorin family protein, putative, expressed
Sobic.009G070250	Suscepible vs Resistant	5 10 15	Higher in Susceptible	392	198.333	15.1033	208.333	25.208	6.66667	4.40959	12.6667	2.18581	112	35.3883	151.667	38.843	4	2	5.66667	2.848	172.333	2.60342	103.667	10.0388	6	0.57735	5	0	AT5G22010.1	replication factor C1	LOC_Os11g36390.1	RFC1 - Putative clamp loader of PCNA, replication factor C subunit 1, expressed
Sobic.009G012200	Suscepible vs Resistant	10	Lower in Susceptible	95	0	0	0	0	16	2.08167	17	1.73205	0	0	0	0	19.6667	3.1798	15	2.88675	0	0	0	0	14.6667	2.4037	18.6667	3.1798	AT5G45400.1	Replication factor-A protein 1-related	LOC_Os05g02040.1	RPA1C - Putative single-stranded DNA binding complex subunit 1, expressed
Sobic.009G012500	Suscepible vs Resistant	5 10 15	Lower in Susceptible	289	11.3333	4.37163	0	0	53.6667	9.17121	66.3333	2.90593	6.33333	3.75648	4	2	73	16.4621	70.3333	17.6761	9.33333	1.33333	9.33333	6.98411	102.333	28.9156	80	3.60555	AT5G45400.1	Replication factor-A protein 1-related	LOC_Os05g02040.1	RPA1C - Putative single-stranded DNA binding complex subunit 1, expressed
Sobic.010G243100	Suscepible vs Resistant	10	Lower in Susceptible	95	10.6667	1.45297	6.33333	3.28295	23.3333	9.38675	14.3333	4.40959	3.33333	3.33333	3	3	28	9.53939	25.3333	7.17248	14	3	6.66667	3.33333	27.6667	6.00925	21.6667	1.66667	AT2G24490.2	replicon protein A2	LOC_Os06g47830.1	RPA2C - Putative single-stranded DNA binding complex subunit 2, expressed
Sobic.003G200000	Suscepible vs Resistant	5 10 15	Higher in Susceptible	392	27	2.08167	26.6667	4.63081	2	2	2	2	23	5.85947	26	2.08167	0	0	1.66667	1.66667	28	1.1547	24.6667	7.31057	0	0	0	0	AT1G64060.1	respiratory burst oxidase protein F	LOC_Os05g45210.1	respiratory burst oxidase, putative, expressed
Sobic.006G152000	Suscepible vs Resistant	10 15	Lower in Susceptible	170	81.6667	5.696	75	8.62168	171	9.53939	149.333	9.20748	57	8.0829	66.3333	6.43774	180.333	6.56591	149	12.5831	96.3333	2.90593	67	6.80686	210.333	23.1397	203	2.08167	AT5G22790.1	reticulata-related 1	LOC_Os04g44290.1	expressed protein
Sobic.007G187700	Suscepible vs Resistant	10 15	Lower in Susceptible	170	171	81.267	78.3333	32.0953	114	60.2578	91.6667	40.1843	47.3333	6.17342	25.6667	1.45297	156	58.9604	176.333	63.5724	178.333	25.3136	85.3333	43.2101	187.667	80.4764	152.667	35.1014	AT3G12280.2	retinoblastoma-related 1	LOC_Os08g42600.1	retinoblastoma-related protein-like, putative, expressed
Sobic.001G159032	Suscepible vs Resistant	5 10 15	Higher in Susceptible	392	161.333	8.76229	175	17.0392	7	4.3589	5	2.64575	132.667	26.1937	155	27.6827	6	3	2.66667	2.66667	110	4	76.6667	9.26163	0	0	0	0	AT4G03100.1	Rho GTPase activating protein with PAK-box/P21-Rho-binding domain	LOC_Os12g34840.1	rhoGAP domain containing protein, expressed
Sobic.010G003200	Suscepible vs Resistant	10 15	Lower in Susceptible	170	41.6667	3.71184	33	6.02771	45.3333	6.35959	42.3333	2.66667	13.3333	4.09607	15	4.16333	36	3.4641	44.6667	7.35603	24	2.08167	17.3333	7.88106	30	4.04145	24.6667	4.91031	AT4G24580.1	Rho GTPase activation protein (RhoGAP) with PH domain	LOC_Os03g11140.3	pleckstrin homology domain-containing protein-related taxo, putative, expressed
Sobic.002G278700	Suscepible vs Resistant	10 15	Higher in Susceptible	200	40.3333	17.1885	18	4.50925	130.667	108.691	18	3	128.667	49.6465	31.6667	19.0992	26	11.5036	48	21.5019	24.6667	5.54777	32.3333	19.4622	20.3333	5.23874	11	2.51661	AT1G14220.1	Ribonuclease T2 family protein	LOC_Os09g36680.1	ribonuclease T2 family domain containing protein, expressed
Sobic.002G278800	Suscepible vs Resistant	10 15	Higher in Susceptible	200	724.667	300.459	172.333	74.4968	818	672.216	91	14	1673.67	531.706	233.333	169.251	185	51.7816	351.333	159.28	577.667	61.8097	66	35.7911	129.667	63.2833	82.3333	22.2286	AT1G14220.1	Ribonuclease T2 family protein	LOC_Os09g36700.1	ribonuclease T2 family domain containing protein, expressed
Sobic.007G169533	Suscepible vs Resistant	10 15	Lower in Susceptible	170	88.6667	72.6873	269.667	245.667	272.667	130.831	244	118.507	25.6667	3.28295	25.3333	4.17665	406	45.17	377.333	85.3411	26.6667	2.02759	29	5.50757	531.333	20.0194	366.667	173.724	AT1G08360.1	Ribosomal protein L1p/L10e family	LOC_Os08g44380.1	L1P family of ribosomal proteins domain containing protein, expressed
Sobic.007G169500	Suscepible vs Resistant	5 10 15	Lower in Susceptible	289	48.6667	12.1427	65	23.5867	2392	41.9325	2043.67	99.6433	46.3333	24.3402	43.3333	10.3976	2459	92.6517	2297.67	147.162	35	9.45163	16	4.16333	2803	145.211	2825.67	99.7619	AT1G08360.1	Ribosomal protein L1p/L10e family	LOC_Os08g44380.2	L1P family of ribosomal proteins domain containing protein, expressed
Sobic.007G194500	Suscepible vs Resistant	10	Lower in Susceptible	95	21	2.08167	30.3333	0.881917	23.3333	4.09607	28	5.03322	12	1.1547	27.3333	3.1798	30.3333	3.1798	31.6667	3.4801	23.6667	1.85592	33.3333	3.75648	22	1	28.3333	2.02759	AT1G27400.1	Ribosomal protein L22p/L17e family protein	LOC_Os09g08430.1	ribosomal protein L22, putative, expressed
Sobic.003G061000	Suscepible vs Resistant	5 10 15	Lower in Susceptible	289	4.66667	2.4037	2.66667	2.66667	81	9.64365	112.333	4.66667	0	0	4.33333	2.18581	56	13.5277	71.6667	1.45297	0	0	3.33333	1.66667	85	6.80686	95.3333	5.36449	AT3G17465.1	ribosomal protein L3 plastid	LOC_Os01g14830.1	ribosomal protein L3, putative, expressed
Sobic.006G206900	Suscepible vs Resistant	5 10 15	Lower in Susceptible	289	4.66667	4.66667	4	2	120.333	10.6823	93	6.1101	6.33333	3.4801	5	2.51661	97.3333	11.8509	108.333	15.3876	3.33333	3.33333	0	0	96.6667	10.8372	102.667	3.84419	AT2G44120.2	Ribosomal protein L30/L7 family protein	LOC_Os04g51630.1	60S ribosomal protein L7, putative, expressed
Sobic.003G175400	Suscepible vs Resistant	5 10	Lower in Susceptible	161	0	0	4	4	68.3333	10.8372	60.3333	4.97773	4	4	0	0	47.3333	5.84047	47.6667	4.66667	3.33333	1.66667	0	0	39.6667	4.91031	20.6667	3.92994	AT2G47610.1	Ribosomal protein L7Ae/L30e/S12e/Gadd45 family protein	LOC_Os08g23710.1	ribosomal protein L7Ae, putative, expressed
Sobic.003G439900	Suscepible vs Resistant	5 10 15	Higher in Susceptible	392	497.667	39.1592	318	1	16.3333	5.84047	16.6667	10.8372	230.667	62.6906	191	53.1131	15.6667	2.60342	11.6667	2.02759	453.333	23.73	259.667	31.3174	2.66667	2.66667	5.66667	0.666667	AT5G09500.1	Ribosomal protein S19 family protein	LOC_Os07g08660.1	40S ribosomal protein S15, putative, expressed
Sobic.001G208800	Suscepible vs Resistant	5	Lower in Susceptible	131	5.66667	2.848	14.3333	3.84419	29	4.3589	19.6667	4.91031	10.6667	4.17665	15	5	17.6667	1.76383	15.3333	2.4037	11.3333	1.66667	14.3333	4.91031	7.66667	4.97773	20.6667	2.72845	AT1G23410.1	Ribosomal protein S27a / Ubiquitin family protein	LOC_Os01g22490.1	40S ribosomal protein S27a, putative, expressed
Sobic.003G217300	Suscepible vs Resistant	10 15	Higher in Susceptible	200	17.6667	1.76383	18	1.1547	10	1	11.6667	1.20185	23.6667	1.76383	27	3.78594	9.66667	1.85592	14	1	21.3333	4.84195	28	2.51661	9.33333	2.02759	8.66667	1.85592	AT1G11020.1	RING/FYVE/PHD zinc finger superfamily protein	LOC_Os08g29590.1	zinc finger, C3HC4 type family protein, expressed
Sobic.003G357166	Suscepible vs Resistant	5 10 15	Lower in Susceptible	289	11.3333	0.333333	11	2.88675	54	5.68624	53.3333	3.1798	7.66667	4.63081	8	0.57735	51.3333	4.05518	60.6667	4.17665	19.3333	4.91031	12.6667	2.60342	134	8.0829	120.333	4.33333	AT5G05830.1	RING/FYVE/PHD zinc finger superfamily protein	LOC_Os05g37900.1	zinc finger, C3HC4 type domain containing protein, expressed
Sobic.001G520400	Suscepible vs Resistant	10 15	Higher in Susceptible	200	13.3333	2.02759	14.6667	6.33333	5.66667	2.848	13.3333	2.33333	28.3333	6.83943	14.6667	3.4801	10	2.64575	6.33333	3.28295	13	2.64575	21.6667	2.848	6.33333	4.09607	16	4.16333	AT1G76410.1	RING/U-box superfamily protein	LOC_Os02g58540.1	RING-H2 finger protein, putative, expressed
Sobic.004G109200	Suscepible vs Resistant	10 15	Higher in Susceptible	200	19.3333	4.17665	13	2.51661	3	3	3	3	35.3333	9.06152	0	0	5.66667	3.1798	0	0	18	1.1547	7	1	6.66667	1.66667	5	0	AT3G18930.2	RING/U-box superfamily protein	LOC_Os02g15000.1	zinc finger, C3HC4 type domain containing protein, expressed
Sobic.009G168900	Suscepible vs Resistant	10 15	Higher in Susceptible	200	12.6667	2.18581	25.6667	4.84195	15.6667	2.96273	34	4.04145	16	2.08167	45.6667	11.865	4	2	23.3333	3.1798	9.66667	0.333333	23.3333	4.37163	10.6667	3.1798	16.3333	0.881917	AT3G11110.1	RING/U-box superfamily protein	LOC_Os05g39260.1	zinc finger, C3HC4 type domain containing protein, expressed
Sobic.004G332500	Suscepible vs Resistant	5	Lower in Susceptible	131	50	9.64365	115.333	10.4934	198.667	12.8106	202.667	22.2136	81.6667	8.64741	111.667	12.3333	179.667	20.3661	98.3333	6.69162	89.3333	16.2515	144	1.52753	197.667	7.5351	138.667	2.18581	AT3G02340.1	RING/U-box superfamily protein	LOC_Os09g06740.1	zinc finger, C3HC4 type domain containing protein, expressed
Sobic.004G148300	Suscepible vs Resistant	10	Higher in Susceptible	115	6.33333	3.75648	6	3.05505	0	0	2	2	22	3.78594	5.66667	3.1798	4	2	1.66667	1.66667	6	3.78594	9.33333	5.81187	1.66667	1.66667	14.6667	4.84195	AT5G39110.1	RmlC-like cupins superfamily protein	LOC_Os02g29000.1	Cupin domain containing protein, expressed
Sobic.006G018100	Suscepible vs Resistant	10	Higher in Susceptible	115	119.667	15.857	219	75.5006	104.333	34.3333	80.6667	16.3843	105.667	25.6732	216	84.2397	35.3333	2.60342	57.6667	6.83943	72.6667	4.33333	253	85.6874	44	5	40.6667	2.4037	AT3G05950.1	RmlC-like cupins superfamily protein	LOC_Os08g13440.2	cupin domain containing protein, expressed
Sobic.009G017600	Suscepible vs Resistant	10 15	Higher in Susceptible	200	1787.33	102.699	1470.33	184.179	687.333	31.5929	654.667	68.6278	2769.33	499.526	942.333	143.379	606.333	52.3015	530	39.145	1638.67	110.569	1098.33	118.177	648.333	37.1229	675.333	13.5933	AT2G28680.1	RmlC-like cupins superfamily protein	LOC_Os05g02520.1	cupin domain containing protein, expressed
Sobic.008G120132	Suscepible vs Resistant	5 10 15	Higher in Susceptible	392	256	23.8956	238	45.6326	9.66667	6.88799	10.6667	3.28295	125.333	27.3882	143	27.9344	3	3	2	2	225	11.7898	137.333	5.60753	0	0	3.33333	1.66667	AT3G08010.1	RNA binding	LOC_Os02g39740.1	psaB translation factor, putative, expressed
Sobic.010G104000	Suscepible vs Resistant	10 15	Lower in Susceptible	170	4	2	2.66667	2.66667	13.3333	1.66667	13.3333	0.881917	0	0	2.66667	2.66667	15.6667	2.33333	9.33333	1.76383	6	1	2.66667	2.66667	9.33333	1.76383	9	3.05505	AT5G66470.1	RNA binding;GTP binding	LOC_Os05g49220.1	GTP-binding protein, putative, expressed
Sobic.001G413300	Suscepible vs Resistant	10 15	Higher in Susceptible	200	14	4.16333	16	1.73205	4.66667	2.4037	13.3333	2.02759	13.3333	4.09607	23.6667	9.70109	0	0	12.3333	1.20185	10.3333	1.76383	19	5.50757	7.66667	4.33333	4.66667	2.60342	AT1G32490.1	RNA helicase family protein	LOC_Os03g17432.1	pre-mRNA-splicing factor ATP-dependent RNA helicase DHX16, putative, expressed
Sobic.005G131800	Suscepible vs Resistant	10 15	Lower in Susceptible	170	32.3333	5.78312	32.3333	3.66667	45.3333	2.33333	49	2.64575	19	3.51188	23.6667	4.91031	50.3333	7.4461	59	7.50555	29.6667	3.52767	48	9.07377	69	12.8582	53	0	AT4G35800.1	RNA polymerase II large subunit	LOC_Os05g05860.1	retrotransposon protein, putative, unclassified, expressed
Sobic.009G141000	Suscepible vs Resistant	5 10 15	Higher in Susceptible	392	314.333	6.56591	280.667	22.674	8	5.68624	11.3333	6.64162	353	20.232	1.26707e+07	1.26704e+07	8	4.04145	9.33333	5.20683	277	13.6137	234	43.2782	0	0	3.33333	1.66667	AT1G09660.1	RNA-binding KH domain-containing protein	LOC_Os01g66300.1	KH domain containing protein, putative, expressed
Sobic.008G010000	Suscepible vs Resistant	5 10 15	Lower in Susceptible	289	4	2	2	2	30.6667	4.09607	31	2.51661	4	4	2	2	23	2.64575	31.6667	4.63081	7.66667	1.45297	6.33333	0.881917	23.3333	3.1798	17	2.64575	AT2G30280.1	RNA-directed DNA methylation 4	LOC_Os11g01880.1	expressed protein
Sobic.004G332800	Suscepible vs Resistant	10 15	Higher in Susceptible	200	16	3.60555	28.6667	3.4801	12	1.52753	37	16.6233	21	3.05505	34.3333	2.848	7.66667	1.66667	25.6667	6.33333	233.667	32.0017	1005.33	147.74	283	62.3886	557	53.6781	AT1G80570.2	RNI-like superfamily protein	LOC_Os04g30200.1	OsFBL14 - F-box domain and LRR containing protein, expressed
Sobic.001G300750	Suscepible vs Resistant	5 10 15	Higher in Susceptible	392	31	1.52753	31.6667	5.89727	0	0	2	2	23.6667	4.17665	19.6667	2.90593	0	0	0	0	22.3333	4.66667	14	1.52753	0	0	0	0	AT4G03010.1	RNI-like superfamily protein	LOC_Os11g42450.1	leucine-rich repeat family protein, putative, expressed
Sobic.007G070300	Suscepible vs Resistant	5 10 15	Higher in Susceptible	392	1198.67	194.191	1485.67	139.071	24	4.16333	34	14.1539	1220	377.54	2407.33	524.017	23	7.37111	36	12.3423	684.333	85.2082	1021.67	173.269	9	0.57735	10	6.08276	AT4G05460.1	RNI-like superfamily protein	LOC_Os08g09450.1	OsFBL41 - F-box domain and LRR containing protein, expressed
Sobic.007G070500	Suscepible vs Resistant	5 10 15	Higher in Susceptible	392	50.6667	8.37324	72.3333	6.17342	5.33333	3.1798	10.6667	2.18581	87.3333	8.45248	90.6667	10.9291	5	2.64575	10.3333	3.38296	62.6667	9.38675	86.6667	4.48454	8	1.52753	14.3333	1.85592	AT4G05460.1	RNI-like superfamily protein	LOC_Os08g09450.1	OsFBL41 - F-box domain and LRR containing protein, expressed
Sobic.001G303825	Suscepible vs Resistant	10 15	Lower in Susceptible	170	4	2	8.33333	2.33333	15.6667	2.33333	15.6667	1.76383	0	0	13.3333	2.02759	12	6.65833	8	2	0	0	2.66667	2.66667	10.3333	2.72845	13	1.52753	AT5G07670.1	RNI-like superfamily protein	LOC_Os02g44104.1	F-box family protein, putative, expressed
Sobic.007G070700	Suscepible vs Resistant	10 15	Lower in Susceptible	170	2	2	2	2	11	2.64575	19	6.55744	4	4	2	2	34.6667	8.35331	24.6667	2.4037	1.66667	1.66667	0	0	13	2.64575	14	1.1547	AT4G05460.1	RNI-like superfamily protein	LOC_Os08g09410.1	OsFBX265 - F-box domain containing protein, expressed
Sobic.007G090445	Suscepible vs Resistant	5 10 15	Lower in Susceptible	289	2.66667	2.66667	6	0	24.6667	4.84195	25.6667	1.76383	2.33333	2.33333	7	3.78594	28	7.81025	21.6667	2.33333	3	3	0	0	13.6667	0.666667	19.6667	0.881917	AT4G05497.1	RNI-like superfamily protein	LOC_Os08g09450.1	OsFBL41 - F-box domain and LRR containing protein, expressed
Sobic.007G090451	Suscepible vs Resistant	5 10 15	Lower in Susceptible	289	6	3.4641	4.66667	2.4037	155	41.7612	180.333	18.9766	5.33333	5.33333	7	4.3589	216.667	59.1786	160	12.2882	6.66667	3.38296	2.66667	2.66667	111.333	16.2207	127.333	8.74325	AT4G03630.1	RNI-like superfamily protein	LOC_Os08g09450.1	OsFBL41 - F-box domain and LRR containing protein, expressed
Sobic.008G159701	Suscepible vs Resistant	5	Higher in Susceptible	107	31.6667	5.696	18.6667	0.666667	9	3	7	3.78594	24.6667	3.4801	25.6667	2.18581	13.6667	3.71184	18	3.4641	39.6667	3.52767	35	1.1547	18.6667	5.20683	27	3.05505	AT5G45160.1	Root hair defective 3 GTP-binding protein (RHD3)	LOC_Os12g41170.1	SEY1, putative, expressed
Sobic.004G036100	Suscepible vs Resistant	10 15	Higher in Susceptible	200	2220.33	269.341	1520.67	257.14	589.667	278.934	1248.33	366.799	2281.33	182	985	201.609	331.667	125.622	1017.67	178.481	1354	240.804	661.333	281.221	932.333	131.548	1025	91.0165	AT5G04370.2	S-adenosyl-L-methionine-dependent methyltransferases superfamily protein	LOC_Os06g13310.1	SAM dependent carboxyl methyltransferase, putative, expressed
Sobic.004G036200	Suscepible vs Resistant	5 10 15	Higher in Susceptible	392	6061.67	2266.36	8795.67	1524.79	84	36.7741	282.333	61.7369	3910	233.087	10974.7	654.687	141	37.8065	213.333	21.8276	7948.67	1106.66	16836	1782.36	206.333	42.2072	218	48.645	AT5G04370.2	S-adenosyl-L-methionine-dependent methyltransferases superfamily protein	LOC_Os06g13310.1	SAM dependent carboxyl methyltransferase, putative, expressed
Sobic.003G104900	Suscepible vs Resistant	10	Lower in Susceptible	95	0	0	0	0	10	6.08276	13.3333	3.33333	0	0	0	0	16	4.72582	17.3333	2.90593	0	0	0	0	9.66667	3.71184	9.33333	6.17342	AT5G38020.1	S-adenosyl-L-methionine-dependent methyltransferases superfamily protein	LOC_Os05g01140.1	methyltransferase, putative, expressed
Sobic.003G445700	Suscepible vs Resistant	5 10	Lower in Susceptible	161	15	6.50641	10.6667	1.45297	54	4.72582	71.6667	13.2455	8.33333	5.60753	2	2	71.3333	10.8372	74.3333	3.71184	18	4.04145	14	4.93288	66	5.68624	70.6667	8.00694	AT5G57300.1	S-adenosyl-L-methionine-dependent methyltransferases superfamily protein	LOC_Os01g74520.1	methyltransferase domain containing protein, putative, expressed
Sobic.010G037200	Suscepible vs Resistant	10 15	Lower in Susceptible	170	25.6667	5.23874	15.3333	2.33333	55.3333	1.20185	60.6667	8.41295	18.6667	0.333333	13.3333	3.84419	76.3333	6.76593	77	1.52753	36	1.52753	38	5.7735	96	1.52753	98	12.6623	AT5G04370.2	S-adenosyl-L-methionine-dependent methyltransferases superfamily protein	LOC_Os06g20920.1	SAM dependent carboxyl methyltransferase, putative, expressed
Sobic.002G044700	Suscepible vs Resistant	5 10 15	Lower in Susceptible	289	4	2	7	7	29	11.9304	14	2	0	0	3	3	23.6667	9.68389	15	3.51188	3.33333	1.66667	2	2	54.6667	9.27961	28	2.64575	AT5G04370.2	S-adenosyl-L-methionine-dependent methyltransferases superfamily protein	LOC_Os06g13310.1	SAM dependent carboxyl methyltransferase, putative, expressed
Sobic.004G291700	Suscepible vs Resistant	5 10 15	Lower in Susceptible	289	13	3.05505	11.6667	1.85592	48	5.03322	72	8.18535	9	4.58258	6	3.21455	55	11.5326	71	7.37111	13.6667	1.76383	9.66667	0.881917	68	9.60902	93	12.4231	AT1G48600.2	S-adenosyl-L-methionine-dependent methyltransferases superfamily protein	LOC_Os01g50030.1	CPuORF25 - conserved peptide uORF-containing transcript, expressed
Sobic.009G097200	Suscepible vs Resistant	10 15	Higher in Susceptible	200	512	31.4802	752.333	19.7428	288.667	57.3914	341	51.7301	739	47.4798	882.667	19.0117	190.333	30.2783	204.333	9.35117	679	23.388	759.333	36.8435	213.333	14.7686	195.333	41.8343	AT3G51730.1	saposin B domain-containing protein	LOC_Os05g26954.1	saposin-like type B, region 1 family protein, putative, expressed
Sobic.009G097250	Suscepible vs Resistant	5 10 15	Higher in Susceptible	392	262.333	22.3408	318.333	15.1914	16.3333	10.8372	13.3333	3.92994	387	9.0185	417.333	30.6884	18	3.05505	15	4.04145	331	13.8924	331	34	11.6667	2.02759	7.33333	3.71184	AT5G01800.1	saposin B domain-containing protein	LOC_Os05g26954.1	saposin-like type B, region 1 family protein, putative, expressed
Sobic.010G252500	Suscepible vs Resistant	5	Higher in Susceptible	107	160.667	61.1046	293	72.9932	49.3333	13.5688	81.6667	4.97773	111.667	14.2517	251.333	66.1673	57.6667	14.678	67.6667	15.5063	72.6667	6.17342	194.333	25.9572	52.3333	1.76383	48	6.80686	AT3G20220.1	SAUR-like auxin-responsive protein family	LOC_Os06g48860.1	OsSAUR28 - Auxin-responsive SAUR gene family member, expressed
Sobic.004G156300	Suscepible vs Resistant	5 10 15	Higher in Susceptible	392	25.6667	3.4801	75.3333	14.4376	4	2	7.33333	3.71184	106.333	23.6807	335	75.3459	10	2.64575	14.6667	4.8074	156	43.6616	1764.67	1185.21	7.66667	0.333333	7.66667	2.66667	AT5G50760.1	SAUR-like auxin-responsive protein family	LOC_Os02g30810.1	OsSAUR10 - Auxin-responsive SAUR gene family member, expressed
Sobic.003G065100	Suscepible vs Resistant	10	Lower in Susceptible	95	0	0	3	3	14.6667	5.17472	12	2.08167	0	0	2	2	14.3333	4.17665	12.6667	4.33333	2.33333	2.33333	4.33333	2.33333	14.3333	1.76383	11.3333	0.333333	AT1G16510.1	SAUR-like auxin-responsive protein family	LOC_Os01g06230.1	OsSAUR1 - Auxin-responsive SAUR gene family member, expressed
Sobic.009G192933	Suscepible vs Resistant	10	Lower in Susceptible	95	14	4.04145	12.6667	0.881917	25.6667	1.76383	22	1	9	2.51661	9.33333	4.70225	30	2.51661	23.6667	1.76383	12.3333	1.20185	12.3333	3.71184	27.3333	1.33333	20.6667	1.76383	AT5G27780.1	SAUR-like auxin-responsive protein family	LOC_Os09g37400.1	OsSAUR45 - Auxin-responsive SAUR gene family member, expressed
Sobic.008G012700	Suscepible vs Resistant	5 10	Lower in Susceptible	161	2	2	7.33333	0.666667	36.6667	2.33333	41.3333	3.4801	0	0	0	0	35.3333	2.90593	37	5.50757	7.66667	1.76383	6	1	56.3333	5.04425	47	4.04145	AT1G50420.1	scarecrow-like 3	LOC_Os12g04370.1	GRAS family transcription factor containing protein, expressed
Sobic.001G186300	Suscepible vs Resistant	5 10 15	Higher in Susceptible	392	93.6667	3.1798	112.333	16.3843	3	3	2.66667	2.66667	59.6667	24.0647	77.3333	20.7552	0	0	0	0	81.6667	3.71184	86.3333	1.33333	0	0	0	0	AT3G24315.1	Sec20 family protein	LOC_Os02g44111.1	sec20 domain containing protein, expressed
Sobic.005G110499	Suscepible vs Resistant	10	Higher in Susceptible	115	12.6667	1.45297	14.3333	1.66667	8.33333	4.25572	8.66667	1.76383	43.3333	26.0278	30.3333	18.8532	8	1	42.6667	34.1679	11.6667	2.4037	10	1.1547	7.66667	4.33333	52	38.0044	AT3G23660.1	Sec23/Sec24 protein transport family protein	LOC_Os11g24560.1	protein transport protein, putative, expressed
Sobic.003G143100	Suscepible vs Resistant	10 15	Higher in Susceptible	200	39	6.08276	69.6667	14.1931	23.6667	5.66667	15.6667	2.72845	83.3333	1.20185	78.6667	2.18581	24.6667	0.881917	16.6667	2.02759	70	7.02377	108.333	7.5351	28	2.51661	35.3333	5.78312	AT1G17020.1	senescence-related gene 1	LOC_Os10g40880.1	flavonol synthase/flavanone 3-hydroxylase, putative, expressed
Sobic.008G091500	Suscepible vs Resistant	10 15	Higher in Susceptible	200	9	2.08167	8.33333	1.45297	5	2.64575	4.66667	2.4037	11.6667	2.60342	9	2.08167	0	0	8.33333	4.17665	9.33333	2.18581	9	2.08167	8.66667	1.76383	4.33333	2.33333	AT1G17020.1	senescence-related gene 1	LOC_Os10g40934.12	flavonol synthase/flavanone 3-hydroxylase, putative, expressed
Sobic.003G142800	Suscepible vs Resistant	5 10 15	Higher in Susceptible	392	19.6667	1.76383	18.6667	0.881917	2	2	2	2	17	0.57735	14	3.78594	0	0	2.66667	2.66667	19.3333	1.85592	15	3.60555	0	0	0	0	AT1G17020.1	senescence-related gene 1	LOC_Os10g40880.1	flavonol synthase/flavanone 3-hydroxylase, putative, expressed
Sobic.010G068200	Suscepible vs Resistant	5 10 15	Higher in Susceptible	392	268	29.9054	278	12.7671	6.66667	3.38296	12.3333	6.22718	216.333	28.3569	189	11.547	8	1	10.3333	0.333333	269	18.1751	219.333	43.6056	0	0	8.66667	3.66667	AT1G17020.1	senescence-related gene 1	LOC_Os10g40880.1	flavonol synthase/flavanone 3-hydroxylase, putative, expressed
Sobic.005G080400	Suscepible vs Resistant	5 10 15	Lower in Susceptible	289	0	0	0	0	17.3333	4.33333	19	4.93288	2	2	0	0	17	0.57735	14.3333	2.18581	0	0	0	0	13.3333	1.85592	15.6667	1.45297	AT1G17020.1	senescence-related gene 1	LOC_Os03g63900.1	1-aminocyclopropane-1-carboxylate oxidase 2, putative, expressed
Sobic.004G139700	Suscepible vs Resistant	10 15	Higher in Susceptible	200	23.3333	7.31057	36.6667	18.2239	6.66667	3.38296	0	0	38	20.5994	39.6667	5.66667	0	0	0	0	51	16.4418	30	4.04145	0	0	0	0	AT4G12910.1	serine carboxypeptidase-like 20	LOC_Os02g26480.2	OsSCP7 - Putative Serine Carboxypeptidase homologue, expressed
Sobic.004G224700	Suscepible vs Resistant	10 15	Higher in Susceptible	200	33.6667	2.72845	26	3.60555	26	5.50757	26.3333	3.28295	55	28.0238	26	4.3589	21.3333	1.76383	19.6667	5.04425	42.3333	21.8276	21.3333	4.37163	14.3333	0.666667	21.3333	1.66667	AT5G23210.1	serine carboxypeptidase-like 34	LOC_Os02g42310.1	OsSCP8 - Putative Serine Carboxypeptidase homologue, expressed
Sobic.004G224766	Suscepible vs Resistant	10 15	Lower in Susceptible	170	11.3333	2.72845	14.3333	1.20185	11.6667	3.4801	13.3333	4.84195	9	1	14.3333	0.666667	54	38.6825	9.33333	2.18581	11	0.57735	14	3.21455	6	3.05505	8.66667	0.881917	AT5G23210.2	serine carboxypeptidase-like 34	LOC_Os02g42310.1	OsSCP8 - Putative Serine Carboxypeptidase homologue, expressed
Sobic.007G181000	Suscepible vs Resistant	5 10 15	Higher in Susceptible	392	27.6667	4.37163	16.3333	5.23874	3	3	2	2	40.6667	23.1685	11	8.18535	0	0	1.66667	1.66667	11.6667	1.85592	2	2	0	0	0	0	AT1G47710.1	Serine protease inhibitor (SERPIN) family protein	LOC_Os11g13530.1	serpin domain containing protein, putative, expressed
Sobic.002G048100	Suscepible vs Resistant	5 10 15	Lower in Susceptible	289	9.66667	2.02759	17	0.57735	58.6667	0.881917	81.3333	3.1798	12.6667	0.881917	9.66667	0.333333	73	5.2915	73.3333	20.0361	5.66667	2.848	0	0	88.6667	10.8679	75	5.56776	AT1G47710.1	Serine protease inhibitor (SERPIN) family protein	LOC_Os05g43590.1	serpin domain containing protein, putative, expressed
Sobic.009G009900	Suscepible vs Resistant	10	Higher in Susceptible	115	61.6667	9.9387	83	29.0517	23.3333	8.33333	74.3333	43.8571	63.3333	8.19214	115.667	3.1798	15.6667	0.881917	31.3333	1.76383	64.6667	4.63081	60.6667	27.6064	23.6667	5.23874	22.3333	1.76383	AT2G38870.1	Serine protease inhibitor, potato inhibitor I-type family protein	LOC_Os12g36210.1	inhibitor I family protein, putative, expressed
Sobic.008G067200	Suscepible vs Resistant	5 10	Higher in Susceptible	198	58.6667	3.28295	65	1	5	2.64575	8	2	110.667	30.7535	51	19.7569	0	0	2	2	29.3333	5.78312	28.6667	6.9602	1.66667	1.66667	5.33333	2.72845	AT2G38870.1	Serine protease inhibitor, potato inhibitor I-type family protein	LOC_Os12g36210.1	inhibitor I family protein, putative, expressed
Sobic.009G009600	Suscepible vs Resistant	5 10	Higher in Susceptible	198	56.3333	10.8064	135.667	50.5448	17	3.05505	23.3333	3.92994	84	41.3562	140.667	38.3898	28.6667	7.31057	16.3333	2.848	45.6667	4.25572	365	195.638	20	3.05505	24.3333	6.69162	AT5G43580.1	Serine protease inhibitor, potato inhibitor I-type family protein	LOC_Os12g25090.2	expressed protein
Sobic.009G009800	Suscepible vs Resistant	5 10	Higher in Susceptible	198	351.667	58.2647	211.667	29.0364	82.6667	29.248	186.667	68.7273	457.333	159.755	204.667	109.109	38.6667	10.4775	102.667	18.7469	100.667	11.2596	51.6667	8.68588	24.3333	7.17248	55.3333	17.8916	AT2G38870.1	Serine protease inhibitor, potato inhibitor I-type family protein	LOC_Os12g25090.2	expressed protein
Sobic.010G132200	Suscepible vs Resistant	5 10 15	Higher in Susceptible	392	50	11.8462	51.3333	5.81187	13	1.1547	13	2.08167	31	12.7671	36.3333	9.56266	3.66667	3.66667	8.33333	4.91031	62	4.50925	40.6667	11.8369	10.6667	1.76383	9.33333	2.18581	AT3G46860.1	Serine protease inhibitor, potato inhibitor I-type family protein	LOC_Os06g21540.1	inhibitor I family protein, putative, expressed
Sobic.009G009500	Suscepible vs Resistant	5	Lower in Susceptible	131	125.333	17.8543	198.333	20.4966	1148.67	391.691	794.667	145.076	342	60.0028	666.333	228.095	548.667	118.48	948	104.5	99.6667	15.6027	921.333	412.519	853.333	279.136	915	243.286	AT2G38870.1	Serine protease inhibitor, potato inhibitor I-type family protein	LOC_Os12g36210.1	inhibitor I family protein, putative, expressed
Sobic.005G164966	Suscepible vs Resistant	5 10	Higher in Susceptible	198	54.6667	10.4137	85.6667	27.2845	12.6667	3.1798	32.3333	10.8679	38.6667	4.40959	80	13.8684	14.3333	2.02759	22	3.60555	57.6667	9.17121	85.3333	21.8352	22.3333	1.20185	38	4.16333	AT1G64030.1	serpin 3	LOC_Os11g13540.1	serpin domain containing protein, putative, expressed
Sobic.003G018800	Suscepible vs Resistant	5 10 15	Higher in Susceptible	392	374.333	66.3333	690.333	84.8063	55.6667	10.5251	42.3333	10.4934	424.667	6.35959	896.333	84.4775	58.3333	14.746	46.3333	4.40959	501.333	55.0283	997.667	141.489	54.6667	4.09607	64.3333	6.9602	AT5G45920.1	SGNH hydrolase-type esterase superfamily protein	LOC_Os01g11570.1	GDSL-like lipase/acylhydrolase, putative, expressed
Sobic.004G130500	Suscepible vs Resistant	10	Lower in Susceptible	95	9	1.52753	2	2	18.6667	0.666667	18	1.52753	0	0	0	0	22.3333	2.848	19	3.05505	2.33333	2.33333	1.66667	1.66667	14.3333	1.33333	8.66667	0.881917	AT4G10950.1	SGNH hydrolase-type esterase superfamily protein	LOC_Os02g18870.1	GDSL-like lipase/acylhydrolase, putative, expressed
Sobic.006G046300	Suscepible vs Resistant	5	Higher in Susceptible	107	25.3333	3.1798	19.3333	2.90593	7.66667	0.881917	13.3333	3.52767	16.6667	5.78312	17	2.51661	15	7.50555	12	2.64575	10.3333	2.02759	6.66667	3.52767	4.33333	2.18581	14	0.57735	AT2G47430.1	Signal transduction histidine kinase	LOC_Os06g08450.1	histidine kinase, putative, expressed
Sobic.002G327600	Suscepible vs Resistant	10 15	Higher in Susceptible	200	23	6.9282	61	17.7858	4.33333	4.33333	5.33333	2.90593	21.6667	11.348	38.6667	12.9142	0	0	4.66667	2.4037	34	21	30.6667	4.05518	1.66667	1.66667	2.66667	2.66667	AT3G23150.1	Signal transduction histidine kinase, hybrid-type, ethylene sensor	LOC_Os07g15540.1	ethylene receptor, putative, expressed
Sobic.009G105500	Suscepible vs Resistant	5	Higher in Susceptible	107	113.667	22.6667	367.667	32.7482	35.6667	13.8604	67.3333	14.3101	157	24.0208	665	90.9634	62.3333	23.3405	56	5.2915	421.333	52.3461	1258.67	258.996	185.333	23.1397	176.667	25.3399	AT2G19130.1	S-locus lectin protein kinase family protein	LOC_Os11g03820.1	D-mannose binding lectin family protein, expressed
Sobic.001G428900	Suscepible vs Resistant	10	Higher in Susceptible	115	11.3333	3.1798	29.6667	9.33333	4.33333	4.33333	9.66667	0.881917	23.3333	5.81187	72	36.5011	4	2	10.3333	1.20185	27.3333	2.18581	81.6667	39.6246	10.3333	5.36449	23.6667	2.33333	AT2G19130.1	S-locus lectin protein kinase family protein	LOC_Os07g36780.1	S-domain receptor-like protein kinase, putative, expressed
Sobic.006G229200	Suscepible vs Resistant	10	Higher in Susceptible	115	15.3333	1.20185	11.6667	4.70225	9.33333	0.881917	13.6667	3.84419	20	1.52753	15.3333	3.28295	7	1	8.66667	1.76383	21.3333	1.85592	17	2.88675	13	2.88675	14	2.08167	AT4G21390.1	S-locus lectin protein kinase family protein	LOC_Os04g54070.1	receptor-like kinase, putative, expressed
Sobic.006G228400	Suscepible vs Resistant	5 10	Higher in Susceptible	198	67	4.04145	70	13.8924	9.66667	5.78312	5.66667	3.1798	85.6667	5.54777	160.333	13.9563	7	1	6	3.05505	79.3333	4.66667	110.333	24.8819	5	2.64575	9.33333	0.881917	AT1G61610.1	S-locus lectin protein kinase family protein	LOC_Os04g53994.1	kinase, putative, expressed
Sobic.002G314700	Suscepible vs Resistant	5 10 15	Higher in Susceptible	392	24.6667	1.76383	29.3333	3.84419	6.66667	0.666667	5	2.64575	28	3.21455	31	4.6188	9	0	9.66667	2.02759	11	2.3094	23.6667	3.75648	6	3.05505	7	1.1547	AT2G19130.1	S-locus lectin protein kinase family protein	LOC_Os01g12430.1	receptor-like protein kinase, putative, expressed
Sobic.009G029100	Suscepible vs Resistant	5 10 15	Higher in Susceptible	392	137	14.2945	156.667	6.11919	15.3333	4.33333	16	4.50925	165.333	4.8074	148.333	7.51295	18.6667	1.20185	18.3333	0.881917	139	8.66025	118.333	21.6205	21.6667	2.33333	20	0.57735	AT1G11330.1	S-locus lectin protein kinase family protein	LOC_Os04g54002.1	serine/threonine-protein kinase receptor precursor, putative, expressed
Sobic.005G203200	Suscepible vs Resistant	10	Lower in Susceptible	95	0	0	2	2	10.6667	1.20185	12	1.73205	0	0	2	2	30	4.04145	27	6	4.33333	2.33333	3.33333	3.33333	45.3333	7.51295	50.3333	4.40959	AT4G11900.1	S-locus lectin protein kinase family protein	LOC_Os12g14610.1	cysteine-rich receptor-like protein kinase 32 precursor, putative, expressed
Sobic.009G018900	Suscepible vs Resistant	5	Lower in Susceptible	131	2	2	2	2	19	2	15.6667	2.60342	6	3.21455	0	0	18	2.3094	17	2.08167	3.33333	3.33333	0	0	24.3333	3.71184	21	1.52753	AT2G19130.1	S-locus lectin protein kinase family protein	LOC_Os04g01310.1	serine/threonine-protein kinase receptor precursor, putative, expressed
Sobic.005G095500	Suscepible vs Resistant	10 15	Lower in Susceptible	170	25.6667	11.2596	74	27.3922	40.3333	10.729	31.3333	3.1798	15	1	20.3333	2.02759	60	11.2694	68	18.4481	19.3333	1.20185	27.3333	1.33333	41.3333	11.8509	82	6.02771	AT1G11330.2	S-locus lectin protein kinase family protein	LOC_Os11g11780.1	cysteine-rich receptor-like protein kinase 21 precursor, putative, expressed
Sobic.005G226000	Suscepible vs Resistant	5 10 15	Lower in Susceptible	289	7.66667	0.881917	7	3.78594	55.3333	8.37324	48	12.0139	6.66667	0.333333	13.3333	2.33333	43	8.544	32.6667	9.38675	7.66667	2.66667	20.3333	9.49269	2.00896e+07	2.00896e+07	60.6667	8.37324	AT2G19130.1	S-locus lectin protein kinase family protein	LOC_Os07g36780.1	S-domain receptor-like protein kinase, putative, expressed
Sobic.008G021300	Suscepible vs Resistant	5 10 15	Higher in Susceptible	392	5924.67	587.871	3944	419.442	1340	80.314	1032.67	75.7283	8788.67	1544.93	4031.33	351.465	1503.67	18.4059	1125.33	74.7537	2421.67	120.024	893.667	218.987	641.667	106.452	384	38.4751	AT2G21530.1	SMAD/FHA domain-containing protein	LOC_Os12g03070.2	FHA domain containing protein, putative, expressed
Sobic.003G286600	Suscepible vs Resistant	10	Higher in Susceptible	115	10.3333	3.38296	15	6.245	11.3333	1.45297	7.66667	0.881917	19.3333	8.83805	43.3333	9.49269	4	2	8.33333	0.333333	25	1	70	27.0062	9	4	21.3333	3.4801	AT1G14290.1	sphingoid base hydroxylase 2	LOC_Os01g46940.1	sphingolipid C4-hydroxylase SUR2, putative, expressed
Sobic.005G210100	Suscepible vs Resistant	10 15	Higher in Susceptible	200	85.6667	15.5063	87	28.0238	60.3333	19.4279	38.6667	10.3494	163	27.0986	83	11.547	41	5.50757	26	12.6623	156	10.4403	58	18.0093	48.3333	8.19214	45	5.50757	AT4G01970.1	stachyose synthase	LOC_Os01g07530.1	uncharacterized glycosyltransferase, putative, expressed
Sobic.008G008801	Suscepible vs Resistant	5	Higher in Susceptible	107	34.6667	5.78312	54	5.1316	2	2	6	3.4641	33	23.7136	41.3333	14.4029	5.66667	5.66667	7.66667	4.97773	32	2	34.6667	2.90593	2	2	0	0	AT2G40410.2	Staphylococcal nuclease homologue	LOC_Os11g01830.1	staphylococcal nuclease homologue, putative, expressed
Sobic.008G162600	Suscepible vs Resistant	10	Lower in Susceptible	95	23.6667	7.51295	94	48.2804	22	5.85947	79.6667	26.8473	29	3.05505	391.667	25.2212	91	62.3244	164.333	30.4923	44.6667	13.3708	339.667	130.836	202	26.6646	179.667	19.2729	AT4G22756.1	sterol C4-methyl oxidase 1-2	LOC_Os10g39810.1	fatty acid hydroxylase, putative, expressed
Sobic.009G184200	Suscepible vs Resistant	10 15	Lower in Susceptible	170	201.333	85.5265	46	14.7309	113.333	65.0137	124	56.3116	51.6667	17.3237	23.6667	6.93622	178	71.6194	247.667	71.345	260.333	19.3592	67	29.6704	242.333	94.0609	210	44.2305	AT5G48600.2	structural maintenance of chromosome 3	LOC_Os05g41750.1	RecF/RecN/SMC N terminal domain containing protein, expressed
Sobic.005G207800	Suscepible vs Resistant	10	Lower in Susceptible	95	29.6667	7.17248	37	8.0829	54.3333	6.17342	81.6667	32.9663	16.6667	3.38296	38	9.64365	57	4.50925	65.3333	3.92994	36	3.60555	58	26.1598	81.6667	9.52774	88.6667	3.4801	AT1G79990.1	structural molecules	LOC_Os02g11830.2	coatomer subunit beta, putative, expressed
Sobic.006G011400	Suscepible vs Resistant	10 15	Higher in Susceptible	200	242.667	24.6667	385.667	46.5558	82.3333	13.776	88.3333	21.6744	413.667	55.4266	358.667	55.2127	104	24.0208	98.3333	18.4962	321.333	8.11035	359.333	90.731	86	9.07377	84.3333	7.31057	AT4G10540.1	Subtilase family protein	LOC_Os04g03100.1	OsSub35 - Putative Subtilisin homologue, expressed
Sobic.002G065300	Suscepible vs Resistant	5 10 15	Higher in Susceptible	392	79.6667	3.92994	74.3333	5.4569	21.3333	1.66667	17.6667	4.17665	79.3333	15.857	56.6667	6.76593	17.3333	2.18581	13	2.64575	65.6667	5.81187	42.6667	4.63081	11.3333	2.18581	15	3.4641	AT5G58840.1	Subtilase family protein	LOC_Os01g52750.1	OsSub3 - Putative Subtilisin homologue, expressed
Sobic.005G165400	Suscepible vs Resistant	10 15	Lower in Susceptible	170	51	19.3993	21.3333	4.09607	83	19.6723	111.667	53.7101	25	6.55744	6.33333	3.1798	126	49.6924	117.667	31.3546	51.6667	10.4775	12	6.1101	173.667	55.84	156.667	28.8983	AT4G10510.1	Subtilase family protein	LOC_Os02g17090.1	OsSub17 - Putative Subtilisin homologue, expressed
Sobic.001G190200	Suscepible vs Resistant	5	Higher in Susceptible	107	255.333	88.5708	566.667	166.639	70.6667	17.901	220.667	63.8288	114	6.245	695.333	131.415	45.6667	11.7237	106.333	17.6761	257.667	62.9082	1039.33	94.4199	144.333	35.7134	247.333	27.3882	AT1G11260.1	sugar transporter 1	LOC_Os03g39710.1	transporter family protein, putative, expressed
Sobic.005G217600	Suscepible vs Resistant	5 10	Lower in Susceptible	161	0	0	0	0	24.3333	5.81187	11.3333	3.52767	0	0	4.33333	2.18581	19	2.3094	14.3333	4.63081	4.33333	2.33333	6	3.05505	20.6667	2.96273	22	1.73205	AT2G14920.1	sulfotransferase 4A	LOC_Os09g38239.1	sulfotransferase domain containing protein, expressed
Sobic.002G279500	Suscepible vs Resistant	5 10 15	Lower in Susceptible	289	300.333	8.29324	298.333	18.2787	1505.33	120.665	1605	83.6242	192.667	42.412	213.333	45.6155	1738	115.547	1766.67	61.1346	204.667	7.42369	102	6.08276	1266	20.502	1301.67	25.8607	AT2G20990.1	synaptotagmin A	LOC_Os09g36770.2	NTMC2Type1.2 protein, putative, expressed
Sobic.003G060500	Suscepible vs Resistant	10	Higher in Susceptible	115	396.667	31.8451	386.667	24.2097	194	50.0033	125.333	24.902	417.667	37.1184	423.333	5.60753	104.667	17.8543	137.333	11.6667	431	11.9304	431.333	12.4141	112.333	6.22718	127.667	12.7715	AT5G20890.1	TCP-1/cpn60 chaperonin family protein	LOC_Os03g42220.1	T-complex protein, putative, expressed
Sobic.001G366300	Suscepible vs Resistant	10	Lower in Susceptible	95	64	18.1751	30	8.3865	85.6667	25.6732	78.3333	20.8992	21	9.07377	11.3333	1.85592	91.6667	20.7391	121	23.6925	68	8.5049	25.6667	12.7845	104.667	29.0765	88	20.8087	AT5G16850.1	telomerase reverse transcriptase	LOC_Os12g19549.1	telomerase reverse transcriptase, putative, expressed
Sobic.004G019400	Suscepible vs Resistant	5	Lower in Susceptible	131	121.667	23.9188	322.333	186.155	919	205.161	509	107.751	203	89.7905	453	135.146	701	80.9341	452.333	9.17121	628.333	95.8581	436.333	176.085	677.333	103.328	449.333	77.9238	AT1G61680.1	terpene synthase 14	LOC_Os02g02930.1	terpene synthase, putative, expressed
Sobic.004G019300	Suscepible vs Resistant	5 10	Lower in Susceptible	161	14	7.02377	15.6667	3.71184	80.3333	13.1698	54	1.73205	7	4.04145	6.66667	4.05518	74.3333	7.88106	50.3333	1.33333	46	9.07377	58	42.0278	142.667	16.7962	87	11.5036	AT1G61680.1	terpene synthase 14	LOC_Os02g02930.1	terpene synthase, putative, expressed
Sobic.004G019100	Suscepible vs Resistant	5 10 15	Lower in Susceptible	289	25	2.51661	27.6667	9.6148	513.667	103.906	419.333	92.7188	18.6667	4.09607	31	2.3094	482.667	17.0717	403.333	23.2403	28.6667	5.36449	23.3333	0.666667	404	34.3123	271.667	44.7747	AT1G61680.1	terpene synthase 14	LOC_Os02g02930.1	terpene synthase, putative, expressed
Sobic.007G034700	Suscepible vs Resistant	5 10 15	Higher in Susceptible	392	93.3333	5.66667	98.3333	16.6767	31	6.50641	39.6667	4.84195	114	19.1572	104	43.2936	22	3.21455	38	2.88675	116.333	4.17665	120.333	55.1795	58.3333	12.7192	27	4.50925	AT5G23960.1	terpene synthase 21	LOC_Os08g04500.1	terpene synthase, putative, expressed
Sobic.009G009300	Suscepible vs Resistant	5 10	Lower in Susceptible	161	11.3333	3.1798	11	6.65833	146	10.2144	169.667	30.6938	2.33333	2.33333	3.66667	3.66667	111	28.746	136.667	11.3186	3	3	0	0	140	14.1892	142	3.21455	AT5G23960.1	terpene synthase 21	LOC_Os02g26014.1	terpene synthase, putative, expressed
Sobic.002G065600	Suscepible vs Resistant	10 15	Lower in Susceptible	170	5	2.64575	7	3.78594	23	7.02377	27.6667	13.691	2	2	13.3333	6.66667	25.3333	7.26483	12.3333	1.20185	6.33333	1.33333	13	5.1316	14	5.19615	29	4	AT5G23960.1	terpene synthase 21	LOC_Os03g24690.1	terpene synthase, putative, expressed
Sobic.006G247500	Suscepible vs Resistant	5 10 15	Lower in Susceptible	289	9	1.73205	8.33333	1.45297	44.6667	3.28295	43	3.51188	12	2	8.66667	1.33333	48	1	45.3333	3.75648	6	3.78594	18.3333	9.35117	51.6667	7.35603	36.3333	1.20185	AT5G23960.2	terpene synthase 21	LOC_Os07g11790.1	terpene synthase, putative, expressed
Sobic.005G130400	Suscepible vs Resistant	5 10	Higher in Susceptible	198	1933.33	954.744	3484.67	1084.23	254.333	8.87568	615.667	32.2197	883.667	174.119	4855.33	851.017	219.667	28.7189	508.333	68.3163	1463.33	368.545	7156.33	932.084	341.667	86.111	344.333	37.3556	AT3G14520.1	Terpenoid cyclases/Protein prenyltransferases superfamily protein	LOC_Os03g24640.1	terpene synthase, putative, expressed
Sobic.006G211400	Suscepible vs Resistant	5	Lower in Susceptible	131	6.66667	3.38296	40.3333	16.0451	53.3333	18.123	22.3333	5.23874	5.33333	2.90593	50.3333	7.83865	17.3333	9.33333	39.3333	24.3949	15	4.3589	23.6667	13.5688	78.6667	38.6667	29.6667	7.85988	AT1G79460.1	Terpenoid cyclases/Protein prenyltransferases superfamily protein	LOC_Os04g52210.1	terpene synthase, putative, expressed
Sobic.007G055600	Suscepible vs Resistant	5	Lower in Susceptible	131	28.6667	12.5742	32.3333	9.76957	148	32.532	92.3333	23.1828	31.6667	4.48454	148	32.3316	73.6667	8.11035	60.3333	12.7061	12	1.1547	57.3333	8.21246	37	2.08167	38.3333	5.84047	AT3G14490.1	Terpenoid cyclases/Protein prenyltransferases superfamily protein	LOC_Os08g07080.1	terpene synthase, putative, expressed
Sobic.004G321400	Suscepible vs Resistant	10	Lower in Susceptible	95	97.6667	29.6104	31	10.2632	58.6667	28.3451	48	13.5277	24	7.23418	12.3333	1.20185	78.3333	25.4384	85.6667	23.3975	90.3333	8.21246	28.6667	10.6823	82	31.4802	75.6667	14.7234	AT3G18730.1	tetratricopeptide repeat (TPR)-containing protein	LOC_Os02g54290.1	BRUSHY 1, putative, expressed
Sobic.003G281700	Suscepible vs Resistant	10 15	Higher in Susceptible	200	4.66667	4.66667	13.3333	0.333333	7.66667	0.881917	6.33333	3.75648	10	3.51188	14.3333	0.666667	0	0	6.66667	0.666667	7.33333	1.45297	3.33333	3.33333	4.33333	2.18581	4	4	AT1G77170.1	Tetratricopeptide repeat (TPR)-like superfamily protein	LOC_Os03g20190.1	pentatricopeptide, putative, expressed
Sobic.001G448500	Suscepible vs Resistant	5 10 15	Higher in Susceptible	392	57.3333	3.52767	61	6.245	0	0	3.66667	3.66667	84	10.9697	97.3333	17.8357	3.66667	3.66667	2	2	69.3333	10.1708	89.3333	7.88106	0	0	2.33333	2.33333	AT3G13160.1	Tetratricopeptide repeat (TPR)-like superfamily protein	LOC_Os01g57630.3	pentatricopeptide containing protein, putative, expressed
Sobic.003G149900	Suscepible vs Resistant	5 10 15	Higher in Susceptible	392	64	4.04145	73	11.6762	2.66667	2.66667	8	4.16333	39.3333	8.98765	59	7.02377	2	2	3.33333	3.33333	50.6667	1.85592	58	7	0	0	2.66667	2.66667	AT3G53170.1	Tetratricopeptide repeat (TPR)-like superfamily protein	LOC_Os03g02430.1	PPR repeat domain containing protein, putative, expressed
Sobic.007G226400	Suscepible vs Resistant	5 10 15	Higher in Susceptible	392	199.333	11.6237	240.333	17.1302	30.3333	4.25572	24.6667	8.74325	173.667	20.8513	193.667	31.9653	29.3333	3.1798	27.6667	0.666667	116.667	7.4461	87.3333	5.54777	32.6667	6.22718	39	3.21455	AT4G02750.1	Tetratricopeptide repeat (TPR)-like superfamily protein	LOC_Os08g37520.1	pentatricopeptide, putative, expressed
Sobic.001G033600	Suscepible vs Resistant	10	Lower in Susceptible	95	22.3333	2.90593	15	3.78594	13.3333	3.38296	17.3333	1.76383	5.66667	2.96273	18.6667	0.881917	24.6667	1.66667	23.6667	4.8074	31.3333	3.28295	36.6667	4.91031	34	7	39.6667	1.66667	AT4G21065.1	Tetratricopeptide repeat (TPR)-like superfamily protein	LOC_Os03g60690.1	pentatricopeptide, putative, expressed
Sobic.008G170600	Suscepible vs Resistant	10	Lower in Susceptible	95	8	1	2	2	7	3.51188	9.33333	1.76383	0	0	2	2	13.3333	1.20185	8	1.73205	9.33333	2.60342	9.66667	1.66667	13.6667	2.4037	15.3333	2.33333	AT1G10330.1	Tetratricopeptide repeat (TPR)-like superfamily protein	LOC_Os05g18950.1	pentatricopeptide, putative, expressed
Sobic.005G028200	Suscepible vs Resistant	10 15	Lower in Susceptible	170	14.3333	3.33333	13	2.51661	33.6667	7.2188	29.3333	5.20683	6.33333	3.4801	9.66667	2.02759	30.3333	1.85592	34	4.72582	19.3333	1.45297	20.3333	3.1798	63	6.245	63.3333	3.84419	AT1G63130.1	Tetratricopeptide repeat (TPR)-like superfamily protein	LOC_Os08g01870.1	Rf1, mitochondrial precursor, putative, expressed
Sobic.001G243800	Suscepible vs Resistant	5 10 15	Higher in Susceptible	392	28	3.78594	37	6.65833	2	2	0	0	42	1.52753	42	11.5326	0	0	2.66667	2.66667	24	2	30.6667	2.33333	0	0	0	0	AT1G22070.1	TGA1A-related gene 3	LOC_Os08g07970.1	transcription factor, putative, expressed
Sobic.004G100400	Suscepible vs Resistant	5 10 15	Higher in Susceptible	392	53.6667	11.9768	71	6.9282	16	4.16333	11	6.65833	61.3333	10.9747	43.3333	10.4934	12.6667	1.85592	14.6667	1.20185	40.6667	5.23874	21.3333	0.881917	7	0.57735	10	1	AT4G24180.1	THAUMATIN-LIKE PROTEIN 1	LOC_Os09g36580.1	thaumatin, putative, expressed
Sobic.006G171801	Suscepible vs Resistant	5 10 15	Higher in Susceptible	392	24	5	21.3333	3.66667	2	2	4	2	19.6667	2.02759	12.6667	5.23874	0	0	0	0	27.6667	4.97773	2.66667	2.66667	0	0	0	0	AT1G68280.1	Thioesterase superfamily protein	LOC_Os04g46710.1	thioesterase family protein, putative, expressed
Sobic.009G035100	Suscepible vs Resistant	10 15	Lower in Susceptible	170	12	1.52753	11.6667	2.848	25.6667	1.76383	33	6.4291	4.66667	4.66667	7	3.51188	26.3333	5.4569	31	2.64575	7.66667	3.92994	11.6667	2.72845	40	1.52753	50.6667	4.48454	AT1G48320.1	Thioesterase superfamily protein	LOC_Os05g04660.1	thioesterase family protein, putative, expressed
Sobic.008G117900	Suscepible vs Resistant	10	Lower in Susceptible	95	12	3.51188	28.3333	7.42369	20.6667	4.09607	37.3333	7.17248	2	2	10.6667	5.36449	22.6667	5.36449	18.6667	7.2188	0	0	7.33333	4.05518	4	2.08167	0	0	AT2G47870.1	Thioredoxin superfamily protein	LOC_Os12g35330.1	OsGrx_C12 - glutaredoxin subgroup III, expressed
Sobic.005G204000	Suscepible vs Resistant	5	Lower in Susceptible	131	28.3333	6.98411	66.3333	29.339	85.3333	12.9142	95.3333	22.5561	41.6667	17.1885	48.6667	11.865	74.6667	23.2116	76	18.4752	16	8.32666	80.6667	33.4581	51	14.0119	73.6667	21.4191	AT4G15680.1	Thioredoxin superfamily protein	LOC_Os11g43550.1	OsGrx_C14 - glutaredoxin subgroup III, expressed
Sobic.003G107800	Suscepible vs Resistant	5 10	Higher in Susceptible	198	614	62.5247	637.667	108.022	98.6667	11.4649	130.333	44.8566	516.333	62.7703	499.667	67.1425	82	9.07377	128.333	15.0591	419.667	25.5626	297.667	75.1029	91.3333	4.66667	81	2.51661	AT4G24930.1	thylakoid lumenal 17.9 kDa protein, chloroplast	LOC_Os01g01280.1	expressed protein
Sobic.002G245300	Suscepible vs Resistant	5	Lower in Susceptible	131	152	36.0416	1563.67	765.319	650	230.84	1806.33	1061.06	313	108.26	2644.67	357.587	1033.33	403.322	2258	1412.62	126.333	53.0859	4743	2663.44	430.667	213.994	487.667	274.185	AT5G47560.1	tonoplast dicarboxylate transporter	LOC_Os09g31130.1	citrate transporter, putative, expressed
Sobic.002G245400	Suscepible vs Resistant	5	Lower in Susceptible	131	451.333	52.2345	1612	449.76	1939.67	87.4878	2118	523.017	1435.67	126.428	3243.33	375.057	2936	104.94	1792	189.388	182.667	35.4699	866.333	129.615	299.333	48.447	388.667	64.2244	AT5G47560.1	tonoplast dicarboxylate transporter	LOC_Os09g31130.1	citrate transporter, putative, expressed
Sobic.009G049800	Suscepible vs Resistant	5 10	Higher in Susceptible	198	1267	134.309	1512.67	41.5706	57	13.4536	55.6667	6.00925	598.333	309.626	1088	415.295	37.3333	5.23874	62.6667	7.17248	897	112.367	681.333	84.2345	30	3.21455	28.6667	4.8074	AT3G16830.1	TOPLESS-related 2	LOC_Os05g15040.1	NB-ARC domain containing protein, expressed
Sobic.009G049600	Suscepible vs Resistant	5 10 15	Higher in Susceptible	392	216.667	14.9481	254.333	25.458	18.3333	2.33333	14.3333	7.62306	103.667	41.1758	185	63.2166	11.6667	3.4801	13.3333	1.66667	192.333	7.33333	133.667	22.784	7	3.51188	7	2	AT3G16830.1	TOPLESS-related 2	LOC_Os05g15040.1	NB-ARC domain containing protein, expressed
Sobic.001G494300	Suscepible vs Resistant	10 15	Lower in Susceptible	170	54.6667	18.622	20.3333	2.72845	41.3333	17.3813	34.3333	10.9747	18.3333	2.18581	18.6667	3.66667	47.3333	11.6667	68.6667	13.5442	67	0.57735	36.3333	4.91031	61.6667	25.2014	65	8	AT5G63920.1	topoisomerase 3alpha	LOC_Os03g06900.1	DNA topoisomerase 3 protein, putative, expressed
Sobic.005G030700	Suscepible vs Resistant	5 10 15	Lower in Susceptible	289	11	2.51661	12.6667	3.52767	327	13.2791	377.667	30.7481	2	2	5	5	228.333	17.2466	311.667	21.797	7.66667	0.333333	1.66667	1.66667	600883	600696	194	20.5994	AT3G17380.1	TRAF-like family protein	LOC_Os10g33830.1	MATH domain containing protein, expressed
Sobic.010G110200	Suscepible vs Resistant	5 10 15	Higher in Susceptible	392	29	1.52753	26	1	2	2	2	2	18	8.62168	24.3333	5.4569	2	2	0	0	29.3333	2.60342	25.3333	0.666667	1.66667	1.66667	0	0	AT5G53360.1	TRAF-like superfamily protein	LOC_Os03g24040.1	seven in absentia protein family domain containing protein, expressed
Sobic.001G175000	Suscepible vs Resistant	10	Lower in Susceptible	95	89.6667	38.3507	25.3333	8.98765	61	25.3246	50	15.0444	29.3333	4.91031	8.33333	1.85592	90.3333	36.2415	102	29.9555	104.667	7.2188	28.6667	8.00694	121.667	49.0453	86.6667	19.5306	AT1G62310.1	transcription factor jumonji (jmjC) domain-containing protein	LOC_Os03g31594.1	jmjC domain containing protein, expressed
Sobic.006G156801	Suscepible vs Resistant	10	Lower in Susceptible	95	31.3333	6.9602	17.3333	2.4037	79	0.57735	77.3333	2.33333	18.6667	4.09607	24.3333	4.09607	83.3333	2.02759	80	4.50925	31	5.19615	40.3333	4.97773	93.3333	9.33333	106.333	3.84419	AT3G15420.1	Transcription factor TFIIIC, tau55-related protein	LOC_Os04g44770.1	expressed protein
Sobic.001G529100	Suscepible vs Resistant	5 10 15	Lower in Susceptible	289	0	0	0	0	30.3333	1.85592	27.6667	7.31057	0	0	0	0	30.6667	4.05518	26	5.85947	0	0	0	0	33.3333	3.84419	28.6667	1.76383	AT3G15420.1	Transcription factor TFIIIC, tau55-related protein	LOC_Os04g44770.1	expressed protein
Sobic.001G257200	Suscepible vs Resistant	10	Higher in Susceptible	115	466.333	46.1892	709	48.5215	143.667	6.64162	158	7.76745	787	123.049	1239.67	110.599	179.667	32.0017	189.333	20.955	656.333	105.934	907.667	100.234	218.333	44.145	194.667	8.11035	AT4G20330.1	Transcription initiation factor TFIIE, beta subunit	LOC_Os10g25770.2	transcription initiation factor IIE subunit beta, putative, expressed
Sobic.008G136601	Suscepible vs Resistant	5 10 15	Lower in Susceptible	289	5.66667	2.848	2	2	56.6667	2.4037	59	6.245	0	0	2	2	50.3333	6.64162	60.6667	5.696	6	1	0	0	56.3333	2.72845	61	3.60555	AT5G13240.1	transcription regulators	LOC_Os04g56730.2	repressor of RNA polymerase III transcription MAF1, putative, expressed
Sobic.001G459400	Suscepible vs Resistant	5 10 15	Lower in Susceptible	289	16	3.78594	9	2.08167	43.6667	3.1798	40.6667	5.36449	13.3333	1.85592	14	2.64575	33.3333	3.75648	45.6667	3.38296	20	2.08167	15	7.93725	42.6667	4.66667	45.6667	2.90593	AT2G24645.1	Transcriptional factor B3 family protein	LOC_Os03g11370.1	B3 DNA binding domain containing protein, expressed
Sobic.004G119700	Suscepible vs Resistant	10	Lower in Susceptible	95	89.3333	38.8859	30	6.65833	74	30.1717	67.6667	24.538	30.6667	8.56997	16	1.52753	89	36.0185	131.667	24.3949	93	6.1101	38.6667	5.36449	124.667	41.4782	123.333	14.4261	AT4G33270.1	Transducin family protein / WD-40 repeat family protein	LOC_Os02g47180.2	WD repeat-containing protein, putative, expressed
Sobic.001G163600	Suscepible vs Resistant	5 10 15	Higher in Susceptible	392	30	4.16333	18.6667	2.60342	5.66667	3.1798	2.66667	2.66667	36.6667	6.11919	16.6667	5.23874	7	1	7.33333	3.71184	27.3333	2.72845	13	2.51661	6.33333	0.881917	2.33333	2.33333	AT3G18950.1	Transducin/WD40 repeat-like superfamily protein	LOC_Os03g42710.1	WD-40 repeat family protein, putative, expressed
Sobic.008G066300	Suscepible vs Resistant	5 10 15	Higher in Susceptible	392	127	11.1355	88	3.4641	6.66667	3.38296	11.3333	2.02759	79.6667	12.7192	58	10.504	11.6667	3.1798	12.3333	2.18581	125	11.3578	108.333	20.3661	8.66667	2.33333	7.33333	0.333333	AT4G29830.1	Transducin/WD40 repeat-like superfamily protein	LOC_Os11g43890.1	WD domain, G-beta repeat domain containing protein, expressed
Sobic.001G353400	Suscepible vs Resistant	5	Lower in Susceptible	131	208.667	13.1191	326.667	37.9707	809.667	101.038	782	65.041	276	49.0034	848	144.128	998.667	17.4197	1365.33	175.781	220.667	28.1504	405	53.563	407.333	24.7274	768	19.3993	AT1G78070.1	Transducin/WD40 repeat-like superfamily protein	LOC_Os03g26870.1	WD-40 repeat family protein, putative, expressed
Sobic.007G085966	Suscepible vs Resistant	5 10 15	Higher in Susceptible	392	205	7.0946	168.333	9.24362	8.33333	4.91031	5.66667	5.66667	145.333	24.6329	136	14.0475	5.66667	3.1798	3.66667	1.85592	194	4.16333	106.333	8.68588	1.66667	1.66667	2.66667	2.66667	AT3G55620.1	Translation initiation factor IF6	LOC_Os07g44620.2	eukaryotic translation initiation factor 6, putative, expressed
Sobic.005G128800	Suscepible vs Resistant	5 10 15	Lower in Susceptible	289	34.3333	6.83943	38	1.52753	855	42.501	886.667	34.9301	17	0.57735	17.3333	2.60342	463.667	55.4987	666	41.4287	18	2.64575	15.6667	1.66667	445	71.631	458	37.421	AT3G16640.1	translationally controlled tumor protein	LOC_Os11g43900.1	translationally-controlled tumor protein, putative, expressed
Sobic.008G139500	Suscepible vs Resistant	5 10 15	Higher in Susceptible	392	48.6667	5.84047	74.6667	1.85592	9	2.3094	5.66667	2.848	60.3333	13.5442	115.333	25.2212	0	0	6.66667	1.20185	68.6667	5.20683	108	8.32666	0	0	0	0	AT2G39130.1	Transmembrane amino acid transporter family protein	LOC_Os12g38570.1	transmembrane amino acid transporter protein, putative, expressed
Sobic.003G207900	Suscepible vs Resistant	5	Lower in Susceptible	131	17.6667	0.666667	104.333	61.0173	83.3333	17.1691	23.3333	1.45297	24.6667	7.2188	243	217.028	19.3333	6.88799	13.6667	2.02759	22.6667	3.84419	27.6667	5.78312	100.333	43.9785	24	7.23418	AT5G15240.1	Transmembrane amino acid transporter family protein	LOC_Os01g41420.1	transmembrane amino acid transporter protein, putative, expressed
Sobic.001G308700	Suscepible vs Resistant	10 15	Higher in Susceptible	200	59	9.50438	47.3333	3.75648	26	2.51661	32	2.64575	84.3333	29.4637	70.6667	7.12585	26.6667	5.36449	24.3333	3.84419	54	7.50555	62	8	15.3333	3.71184	27	6.02771	AT3G51790.1	transmembrane protein G1P-related 1	LOC_Os10g39870.1	ATG1, putative, expressed
Sobic.006G027101	Suscepible vs Resistant	5 10	Higher in Susceptible	198	50	4.04145	52.6667	1.76383	2	2	2	2	24.6667	11.6809	37	4.3589	0	0	3.66667	1.85592	37.6667	7.2188	38.3333	0.881917	0	0	1.66667	1.66667	AT4G10320.1	tRNA synthetase class I (I, L, M and V) family protein	LOC_Os06g43760.1	tRNA synthetase class I, putative, expressed
Sobic.001G100900	Suscepible vs Resistant	5 10 15	Higher in Susceptible	392	3372.33	122.705	3216	162.312	200.333	33.7655	225.333	39.3968	3464.33	292.09	3563	297.879	222	14.4338	230.333	21.458	2990	45.2364	2871.33	383.529	192	4.72582	191	17.3877	AT5G27660.1	Trypsin family protein with PDZ domain	LOC_Os12g04750.1	OsDegp14 - Putative Deg protease homologue, expressed
Sobic.006G249200	Suscepible vs Resistant	5 10 15	Higher in Susceptible	392	42	6.80686	36.6667	2.72845	5.66667	2.848	0	0	25.6667	4.40959	19.3333	5.20683	0	0	1.66667	1.66667	39	6.55744	23.6667	3.84419	1.66667	1.66667	0	0	AT5G27660.1	Trypsin family protein with PDZ domain	LOC_Os07g12810.1	expressed protein
Sobic.008G023600	Suscepible vs Resistant	5 10 15	Higher in Susceptible	392	68	4.72582	73.3333	8.08977	2	2	4	4	45.3333	11.8369	59.6667	18.2239	3	3	8	1.1547	54.6667	8.21246	69.6667	22.1685	0	0	0	0	AT5G27660.1	Trypsin family protein with PDZ domain	LOC_Os12g04750.1	OsDegp14 - Putative Deg protease homologue, expressed
Sobic.004G325500	Suscepible vs Resistant	5 10	Lower in Susceptible	161	16.6667	3.4801	16.3333	3.33333	69.3333	2.90593	86.6667	13.5442	8.33333	5.60753	22	4.72582	64.3333	3.66667	76.3333	2.96273	11.6667	1.76383	17	3.51188	60.3333	5.81187	62.6667	6.93622	AT5G27660.1	Trypsin family protein with PDZ domain	LOC_Os05g07180.1	expressed protein
Sobic.006G254200	Suscepible vs Resistant	10 15	Lower in Susceptible	170	13.3333	2.18581	9.33333	2.02759	28.3333	2.02759	27.3333	2.33333	5.66667	2.96273	8.33333	4.25572	23.3333	2.72845	29.6667	4.66667	13.6667	1.20185	15.3333	0.881917	34.6667	2.33333	25.6667	2.4037	AT5G27660.1	Trypsin family protein with PDZ domain	LOC_Os08g04920.3	OsDegp11 - Putative Deg protease homologue, expressed
Sobic.001G365266	Suscepible vs Resistant	5 10	Lower in Susceptible	161	20.6667	3.66667	23.3333	5.33333	60.3333	10.8985	50.3333	6.64162	18	3.78594	16	3.78594	59.6667	11.392	62.3333	13.0937	25.6667	2.90593	18.6667	8.08977	66.3333	13.691	60.6667	5.696	AT1G19260.1	TTF-type zinc finger protein with HAT dimerisation domain	LOC_Os11g14270.1	transposon protein, putative, unclassified, expressed
Sobic.002G178700	Suscepible vs Resistant	10 15	Lower in Susceptible	170	51	9.53939	36.6667	4.84195	100.667	13.2455	96	25.0067	32.6667	7.75314	21.6667	2.90593	146.333	62.8817	86.3333	10.3333	36.6667	6.22718	32	11.3725	82.3333	16.3333	96.6667	13.9563	AT2G36170.1	Ubiquitin supergroup;Ribosomal protein L40e	LOC_Os09g27930.1	ubiquitin fusion protein, putative, expressed
Sobic.002G230400	Suscepible vs Resistant	10	Lower in Susceptible	95	63.6667	8.98765	39.3333	4.48454	107.333	3.38296	104.333	6.33333	34.3333	6.48931	28.3333	0.333333	119	9.0185	131	11.5036	51	2.08167	36.3333	11.2151	131	6.4291	92.3333	14.1931	AT5G65450.1	ubiquitin-specific protease 17	LOC_Os09g28940.1	ubiquitin carboxyl-terminal hydrolase domain containing protein, expressed
Sobic.003G198080	Suscepible vs Resistant	10	Higher in Susceptible	115	18.6667	5.4569	26.3333	5.92546	3	3	3.33333	3.33333	20.6667	5.60753	17	1.1547	3.66667	3.66667	2	2	15.6667	2.4037	22.3333	4.48454	8.66667	2.33333	10	2.64575	AT3G06910.1	UB-like protease 1A	LOC_Os02g16220.1	expressed protein
Sobic.007G141380	Suscepible vs Resistant	5 10	Higher in Susceptible	198	38.6667	2.33333	36	2.08167	2	2	2	2	24.6667	13.4205	25.6667	8.08977	0	0	0	0	18.6667	1.20185	15	4.72582	0	0	0	0	AT3G06910.1	UB-like protease 1A	LOC_Os04g44640.1	ulp1 protease family, C-terminal catalytic domain containing protein, expressed
Sobic.004G230700	Suscepible vs Resistant	5 10 15	Higher in Susceptible	392	207.667	17.9475	202.667	38.4028	10.6667	7.85988	7	7	75.3333	36.988	124	45.4899	2	2	7	3.51188	83	10.1489	66.6667	1.33333	1.66667	1.66667	1.66667	1.66667	AT3G06910.1	UB-like protease 1A	LOC_Os08g20480.1	OsFBO20 - F-box and other domain containing protein, expressed
Sobic.001G343766	Suscepible vs Resistant	5 10	Lower in Susceptible	161	48	18.7705	89.6667	34.1679	2432	327.492	2734.67	210.734	26.6667	12.1701	71.3333	21.0502	1721.67	342.24	2491	184.31	37	5.7735	14.6667	10.9138	3570.33	123.629	3294	462.954	AT3G06910.1	UB-like protease 1A	LOC_Os04g44640.1	ulp1 protease family, C-terminal catalytic domain containing protein, expressed
Sobic.001G195600	Suscepible vs Resistant	5 10	Lower in Susceptible	161	46	19.1572	47.3333	17.1691	2096.67	292.247	2326.33	387.101	12	7.57188	28	12.0968	1123.67	152.955	1771.33	136.853	22	5.56776	7.33333	3.71184	1546.67	54.8706	1789.33	187.169	AT4G00690.1	UB-like protease 1B	LOC_Os08g20480.1	OsFBO20 - F-box and other domain containing protein, expressed
Sobic.001G334400	Suscepible vs Resistant	5 10 15	Higher in Susceptible	392	26	1	27	3.4641	3.66667	1.85592	6.33333	3.28295	26.6667	2.02759	46.3333	2.96273	2	2	6.66667	1.20185	37.6667	4.37163	29.6667	10.2686	0	0	6.66667	1.66667	AT2G45910.1	U-box domain-containing protein kinase family protein	LOC_Os03g31000.1	protein kinase, putative, expressed
Sobic.005G179400	Suscepible vs Resistant	5 10	Higher in Susceptible	198	33.6667	3.84419	22.3333	4.48454	3.66667	1.85592	3.66667	3.66667	28	9.53939	16	5.50757	2	2	0	0	24	2.64575	15	4.3589	2	2	4.33333	2.33333	AT3G56860.4	UBP1-associated protein 2A	LOC_Os11g39030.1	RNA recognition motif containing protein, putative, expressed
Sobic.002G233400	Suscepible vs Resistant	10	Lower in Susceptible	95	2	2	4.66667	2.4037	16.6667	3.52767	19.3333	2.90593	0	0	5.33333	2.72845	15	3.21455	16	4.6188	3.33333	1.66667	1.66667	1.66667	16	2.51661	16.6667	0.881917	AT2G32300.1	uclacyanin 1	LOC_Os09g29390.1	plastocyanin-like domain containing protein, putative, expressed
Sobic.007G218200	Suscepible vs Resistant	5 10 15	Higher in Susceptible	392	155.667	13.1698	188	13.0767	9.33333	3.84419	4.66667	2.4037	133.667	33.0774	210.667	43.5597	2	2	12.6667	3.52767	178.333	14.8922	215.667	28.3392	3.66667	1.85592	4.33333	2.33333	AT1G08200.1	UDP-D-apiose/UDP-D-xylose synthase 2	LOC_Os01g73790.1	NAD dependent epimerase/dehydratase family protein, putative, expressed
Sobic.010G179400	Suscepible vs Resistant	10 15	Lower in Susceptible	170	0	0	2.66667	2.66667	11	3.60555	13	3.78594	0	0	0	0	14.6667	5.54777	13	0.57735	0	0	2	2	15.6667	6.69162	13	0.57735	AT1G01420.1	UDP-glucosyl transferase 72B3	LOC_Os11g38650.1	UDP-glucoronosyl/UDP-glucosyl transferase, putative, expressed
Sobic.003G233100	Suscepible vs Resistant	10	Higher in Susceptible	115	72.3333	7.5351	67	8.5049	36.6667	6.33333	35.3333	3.28295	99	15.1767	67.3333	11.9768	27.3333	2.02759	28.6667	7.17248	64	9.2376	69	3.05505	25.6667	4.91031	28	1.52753	AT2G15480.2	UDP-glucosyl transferase 73B5	LOC_Os01g45110.1	anthocyanin 3-O-beta-glucosyltransferase, putative, expressed
Sobic.009G186800	Suscepible vs Resistant	5 10 15	Higher in Susceptible	392	48.3333	4.97773	32	6.65833	6.66667	4.40959	6.66667	0.666667	58.3333	10.1708	14.6667	1.20185	6	3	0	0	67	0.57735	12.3333	6.69162	10.6667	1.33333	9.33333	1.20185	AT2G15480.2	UDP-glucosyl transferase 73B5	LOC_Os05g42060.1	UDP-glucoronosyl/UDP-glucosyl transferase, putative, expressed
Sobic.005G192200	Suscepible vs Resistant	5 10 15	Higher in Susceptible	392	30.6667	3.75648	31.6667	4.05518	6.33333	3.28295	0	0	52.6667	8.66667	33	0.57735	5	2.64575	0	0	26.6667	0.881917	42.3333	2.02759	7	1.52753	12.6667	4.25572	AT3G53160.1	UDP-glucosyl transferase 73C7	LOC_Os04g44250.1	cytokinin-O-glucosyltransferase 3, putative, expressed
Sobic.009G064500	Suscepible vs Resistant	5 10 15	Lower in Susceptible	289	2	2	4.66667	2.4037	36.3333	1.76383	44	5.85947	3.33333	3.33333	2	2	40	5.03322	48.6667	7.88106	0	0	0	0	47.3333	5.36449	50.3333	4.25572	AT3G53150.1	UDP-glucosyl transferase 73D1	LOC_Os05g08490.1	cytokinin-O-glucosyltransferase 1, putative, expressed
Sobic.002G305600	Suscepible vs Resistant	10 15	Higher in Susceptible	200	33.3333	8.95048	55.6667	10.4934	32.6667	7.05534	16.6667	4.05518	82.6667	3.75648	57.3333	11.4066	23.6667	3.84419	17	1.52753	51	4.04145	86.3333	12.3468	9.33333	2.96273	19.6667	9.17121	AT1G22360.1	UDP-glucosyl transferase 85A2	LOC_Os07g30369.1	indole-3-acetate beta-glucosyltransferase, putative, expressed
Sobic.006G100900	Suscepible vs Resistant	5 10 15	Higher in Susceptible	392	479.333	128.986	349.667	63.1937	5.66667	2.848	20	8.7178	564.667	149.834	196.333	55.1191	6.33333	3.75648	11	1.52753	486.333	129.277	201	141.892	3.33333	1.66667	2.66667	2.66667	AT1G22360.1	UDP-glucosyl transferase 85A2	LOC_Os04g37820.1	cytokinin-O-glucosyltransferase 2, putative, expressed
Sobic.006G101200	Suscepible vs Resistant	5 10 15	Higher in Susceptible	392	270.333	40.4489	329.667	45.1676	3	3	7.66667	4.09607	134	20.0749	327.333	79.007	5	2.64575	5.33333	2.90593	261.333	50.9717	369	115.326	0	0	1.66667	1.66667	AT1G22360.1	UDP-glucosyl transferase 85A2	LOC_Os04g37820.1	cytokinin-O-glucosyltransferase 2, putative, expressed
Sobic.010G113100	Suscepible vs Resistant	5	Lower in Susceptible	131	7.33333	3.84419	6.66667	4.05518	30.3333	2.60342	23.3333	9.95546	14.6667	2.60342	4.33333	4.33333	11.6667	4.25572	17.6667	2.848	9	2.3094	12	6.9282	13.6667	1.76383	23.6667	2.4037	AT1G22360.1	UDP-glucosyl transferase 85A2	LOC_Os04g25980.1	cytokinin-O-glucosyltransferase 2, putative, expressed
Sobic.007G027200	Suscepible vs Resistant	5	Lower in Susceptible	131	105	19.3477	62.3333	10.1708	468.667	25.543	382.667	73.3424	156	43.5469	23	4.6188	482.667	78.2226	317.667	53.4052	102	2	19.6667	8.41295	307	35.6417	358.667	45.9613	AT3G16520.3	UDP-glucosyl transferase 88A1	LOC_Os06g18670.1	anthocyanidin 3-O-glucosyltransferase, putative, expressed
Sobic.010G117000	Suscepible vs Resistant	5 10 15	Higher in Susceptible	392	24	2.64575	20.6667	5.696	4	2	2.66667	2.66667	17.3333	3.84419	17.6667	9.17121	0	0	3.66667	1.85592	20.6667	2.848	13.6667	2.18581	0	0	0	0	AT1G73880.1	UDP-glucosyl transferase 89B1	LOC_Os06g17020.1	anthocyanin 3-O-beta-glucosyltransferase, putative, expressed
Sobic.006G097800	Suscepible vs Resistant	5	Lower in Susceptible	131	12	1.52753	49.3333	15.0591	35	1.1547	48.6667	11.5662	25.3333	4.63081	59.6667	2.33333	22.6667	6.98411	35.6667	7.5351	15.6667	5.36449	96.6667	17.5721	73.6667	21.6667	137.333	24.8618	AT1G05560.1	UDP-glucosyltransferase 75B1	LOC_Os11g04860.1	anthocyanin 5-O-glucosyltransferase, putative, expressed
Sobic.008G011700	Suscepible vs Resistant	10 15	Lower in Susceptible	170	2	2	4	2	16.6667	1.66667	9.66667	1.85592	0	0	0	0	17.3333	4.17665	17	8.73689	1.66667	1.66667	0	0	5	2.88675	17	3.21455	AT1G05560.1	UDP-glucosyltransferase 75B1	LOC_Os11g04860.1	anthocyanin 5-O-glucosyltransferase, putative, expressed
Sobic.004G106500	Suscepible vs Resistant	10	Higher in Susceptible	115	27.3333	2.33333	24	1.52753	18	1	13	0.57735	50.3333	8.95048	37.3333	8.68588	14.3333	5.60753	16.6667	2.60342	30	3.51188	32.6667	5.17472	15	1.73205	19.6667	0.333333	AT4G01070.1	UDP-Glycosyltransferase superfamily protein	LOC_Os02g14570.1	hydroquinone glucosyltransferase, putative, expressed
Sobic.004G186600	Suscepible vs Resistant	10	Higher in Susceptible	115	249.667	22.5561	299.667	17.9103	98	6.80686	131	4	304.333	48.9773	375.333	73.3129	85.3333	15.7727	78.3333	23.9467	138.333	18.8355	362	49.7594	36.3333	5.17472	76.6667	11.865	AT1G22400.1	UDP-Glycosyltransferase superfamily protein	LOC_Os06g11720.1	cytokinin-O-glucosyltransferase 2, putative, expressed
Sobic.003G076100	Suscepible vs Resistant	10 15	Higher in Susceptible	200	16.3333	3.52767	21.6667	1.33333	4.66667	2.60342	6.33333	3.75648	28.6667	4.91031	32.6667	4.17665	3	3	2.66667	2.66667	23.3333	3.71184	34.3333	5.92546	2.66667	2.66667	4.33333	4.33333	AT4G15480.1	UDP-Glycosyltransferase superfamily protein	LOC_Os01g49230.1	limonoid UDP-glucosyltransferase, putative, expressed
Sobic.005G071300	Suscepible vs Resistant	10 15	Higher in Susceptible	200	30.3333	2.66667	25.3333	7.5351	14.6667	1.20185	11.6667	1.45297	54.3333	8.66667	28.6667	2.02759	12	3	7	3.51188	42	2.08167	27.6667	2.60342	15.6667	1.33333	18	2	AT3G02100.1	UDP-Glycosyltransferase superfamily protein	LOC_Os10g18510.1	UDP-glucoronosyl and UDP-glucosyl transferase domain containing protein, expressed
Sobic.006G123700	Suscepible vs Resistant	10 15	Higher in Susceptible	200	38.6667	5.23874	32	5.2915	19.6667	1.45297	20	3.51188	70	18.9297	23	2.51661	24.6667	4.33333	19.3333	5.60753	36	1	14.6667	2.90593	10.3333	2.33333	15	3.4641	AT5G12890.1	UDP-Glycosyltransferase superfamily protein	LOC_Os04g20330.1	UDP-glucoronosyl/UDP-glucosyl transferase, putative, expressed
Sobic.002G070800	Suscepible vs Resistant	10 15	Lower in Susceptible	170	53	7.76745	23.6667	8.56997	105.667	8.41295	103.333	16.7365	40.6667	8.08977	8	1.52753	121.667	19.8858	90	14.0119	43	8.02081	13	4.3589	88	3.05505	136	14.2244	AT5G49690.1	UDP-Glycosyltransferase superfamily protein	LOC_Os07g10190.1	glucosyltransferase, putative, expressed
Sobic.004G224400	Suscepible vs Resistant	10 15	Lower in Susceptible	170	13.6667	2.90593	29.3333	3.1798	28.3333	1.45297	21	5.50757	10	3.51188	24.6667	8.11035	30	3.4641	30.6667	3.1798	18.3333	1.33333	23.3333	4.8074	23.3333	1.45297	21.3333	3.75648	AT3G22250.1	UDP-Glycosyltransferase superfamily protein	LOC_Os04g44354.1	UDP-glucoronosyl and UDP-glucosyl transferase domain containing protein, expressed
Sobic.004G063000	Suscepible vs Resistant	10 15	Higher in Susceptible	200	62	5.56776	39	4.04145	37.3333	1.85592	30.3333	2.02759	69	20.5183	58	2	22.6667	6.98411	27	1	40	2.88675	50.3333	18.3424	17.6667	2.90593	21	0	AT2G35760.1	Uncharacterised protein family (UPF0497)	LOC_Os02g08110.1	membrane associated DUF588 domain containing protein, putative, expressed
Sobic.001G463301	Suscepible vs Resistant	5 10 15	Higher in Susceptible	392	63.3333	3.92994	63.3333	1.33333	15	3.4641	23	7.54983	64.3333	0.881917	45.3333	13.7396	23.3333	3.38296	16.6667	2.18581	70.3333	2.72845	43.3333	18.2239	23.3333	0.881917	17	2.51661	AT2G28370.1	Uncharacterised protein family (UPF0497)	LOC_Os03g10870.1	membrane associated DUF588 domain containing protein, putative, expressed
Sobic.010G214800	Suscepible vs Resistant	5	Lower in Susceptible	131	37	2.51661	25.6667	5.36449	108	7.76745	74.6667	5.23874	37.3333	10.3976	21	5.50757	82.6667	7.68838	69.3333	9.20748	32.3333	4.91031	13	3	70	1.52753	58	11.2398	AT4G25830.1	Uncharacterised protein family (UPF0497)	LOC_Os06g44610.1	membrane associated DUF588 domain containing protein, putative, expressed
Sobic.006G238400	Suscepible vs Resistant	5 10	Lower in Susceptible	161	27.3333	2.33333	18.3333	2.96273	82	3.60555	68	9.84886	14	7.50555	17.3333	2.33333	87.3333	6.35959	74.3333	1.20185	31.3333	1.20185	22.3333	5.66667	78	7.2111	74.6667	2.02759	AT3G53850.1	Uncharacterised protein family (UPF0497)	LOC_Os05g38250.1	membrane associated DUF588 domain containing protein, putative, expressed
Sobic.009G134450	Suscepible vs Resistant	5 10 15	Higher in Susceptible	392	42.3333	1.20185	29.6667	0.666667	11.6667	6.00925	7.33333	3.71184	52.3333	4.84195	12.6667	3.75648	9.66667	0.666667	2.66667	2.66667	21.3333	6.11919	6.66667	4.40959	6.33333	0.881917	4.33333	2.33333	AT3G24100.1	Uncharacterised protein family SERF	LOC_Os05g33700.1	4F5 protein family protein, expressed
Sobic.004G038500	Suscepible vs Resistant	10 15	Lower in Susceptible	170	33.3333	7.9652	19	6.08276	38.6667	3.4801	33.6667	11.2891	17.3333	5.78312	17.3333	3.84419	55	13.5769	56	4.50925	27.6667	4.33333	26.6667	1.76383	44.6667	8.41295	43.3333	2.18581	AT2G41830.1	Uncharacterized protein	LOC_Os02g05040.1	cyclin-related protein, putative, expressed
Sobic.002G298400	Suscepible vs Resistant	5 10 15	Lower in Susceptible	289	2	2	14.3333	9.02466	22.3333	8.37324	10.6667	5.4569	0	0	6.33333	3.4801	19	1	20	6.65833	27	7.02377	30.6667	10.3976	24.6667	4.09607	31.6667	2.18581	AT5G58770.1	Undecaprenyl pyrophosphate synthetase family protein	LOC_Os01g63830.1	dehydrodolichyl diphosphate synthase, putative, expressed
Sobic.010G115900	Suscepible vs Resistant	5 10	Lower in Susceptible	161	34.6667	13.0427	32.6667	4.91031	1347.67	75.1584	1898	138.753	13	7	25.3333	4.17665	1243.67	62.8393	1626	87.9223	17	8.544	2	2	1261.67	95.515	1390.67	55.8759	AT2G03590.1	ureide permease 1	LOC_Os12g31890.1	ureide permease, putative, expressed
Sobic.004G198100	Suscepible vs Resistant	10	Lower in Susceptible	95	40.6667	8.11035	10.6667	5.60753	24.3333	12.8106	18.3333	6.69162	8	4.16333	0	0	29.6667	11.2151	44	12.1244	42	2.3094	15.3333	6.38575	44.3333	18.0954	44	7.63763	AT3G57860.1	UV-B-insensitive 4-like	LOC_Os02g37850.1	expressed protein
Sobic.002G194600	Suscepible vs Resistant	5 10 15	Higher in Susceptible	392	191	19.6977	82	25.2389	51	23.516	47.3333	13.1951	135.333	88.8713	134	51.984	22.6667	2.60342	16	3.78594	228.333	97.9546	201.667	69.8721	45.6667	34.6715	68.3333	32.9865	AT2G01770.1	vacuolar iron transporter 1	LOC_Os09g23300.1	integral membrane protein, putative, expressed
Sobic.004G013900	Suscepible vs Resistant	10 15	Lower in Susceptible	170	19	2	20.6667	1.66667	24	5.85947	24.3333	4.48454	10.6667	2.90593	25	0	26	2.64575	28	2.64575	13.3333	4.63081	18.6667	1.33333	22.3333	2.18581	24	3.78594	AT2G28520.1	vacuolar proton ATPase A1	LOC_Os01g61780.1	vacuolar ATP synthase 98 kDa subunit, putative, expressed
Sobic.006G211300	Suscepible vs Resistant	10 15	Higher in Susceptible	200	179.667	54.8098	325	87.6945	121	36.428	96.3333	15.4524	432.667	106.374	758.667	179.144	120.667	18.6667	146.667	29.3617	327	32.7414	617.667	112.151	90	8.0829	221	41.5812	AT4G20110.1	VACUOLAR SORTING RECEPTOR 7	LOC_Os04g52190.1	vacuolar-sorting receptor precursor, putative, expressed
Sobic.008G099232	Suscepible vs Resistant	5 10 15	Higher in Susceptible	392	56.3333	3.28295	106	12.5033	2	2	2	2	112	22.6789	147.333	19.7174	5	2.64575	2.66667	2.66667	104.333	12.3333	116.667	8.68588	1.66667	1.66667	0	0	AT3G60600.1	vesicle associated protein	LOC_Os11g17380.1	protein kinase domain containing protein, expressed
Sobic.004G008100	Suscepible vs Resistant	5 10 15	Higher in Susceptible	392	52.6667	8.56997	93.6667	20.2759	5.66667	0.333333	8.33333	1.20185	92.6667	12.0185	282	145.775	9	0	9.66667	2.02759	136.333	10.3494	294.667	7.2188	12.3333	2.18581	11	4	AT1G21240.1	wall associated kinase 3	LOC_Os02g02120.1	OsWAK11 - OsWAK receptor-like protein kinase, expressed
Sobic.003G208700	Suscepible vs Resistant	5 10 15	Lower in Susceptible	289	5.66667	3.1798	4	2	45	6.1101	67	19.6554	15	4.50925	7	3.51188	41	2.08167	46.6667	3.28295	15.3333	4.17665	8.66667	0.666667	59.3333	9.95546	58	6.1101	AT1G21240.1	wall associated kinase 3	LOC_Os09g38840.1	OsWAK90 - OsWAK receptor-like protein kinase, expressed
Sobic.006G152400	Suscepible vs Resistant	10 15	Higher in Susceptible	200	8.66667	1.45297	22.3333	5.20683	0	0	2	2	13.3333	1.85592	23.3333	3.75648	0	0	0	0	14.3333	0.881917	29.6667	9.70109	3.33333	1.66667	0	0	AT1G21230.1	wall associated kinase 5	LOC_Os04g24220.1	OsWAK32 - OsWAK receptor-like protein kinase, expressed
Sobic.004G211000	Suscepible vs Resistant	5 10 15	Lower in Susceptible	289	16.6667	2.848	23	3.60555	127.333	4.66667	186.333	15.6454	14.6667	3.92994	37.6667	1.76383	121.333	19.1253	241.333	20.2018	16.3333	1.76383	60.6667	10.9138	134.667	21.957	215.333	11.5662	AT1G21230.1	wall associated kinase 5	LOC_Os02g42150.1	OsWAK14 - OsWAK receptor-like protein kinase, expressed
Sobic.004G223500	Suscepible vs Resistant	5	Lower in Susceptible	131	32.6667	2.33333	46.3333	4.70225	161.667	66.4839	77	24.0069	64.3333	3.38296	72.6667	13.776	167	29.2973	98.3333	6.76593	57.6667	3.38296	53.6667	6.98411	130.333	33.0118	188.333	17.2272	AT1G21270.1	wall-associated kinase 2	LOC_Os02g42150.1	OsWAK14 - OsWAK receptor-like protein kinase, expressed
Sobic.009G063500	Suscepible vs Resistant	5 10 15	Lower in Susceptible	289	0	0	2	2	23.6667	4.66667	33.6667	2.90593	2.33333	2.33333	2	2	24	1.52753	30.3333	2.848	1.66667	1.66667	0	0	48.6667	3.71184	50.6667	1.76383	AT1G21270.1	wall-associated kinase 2	LOC_Os08g39220.1	OsWAK75 - OsWAK receptor-like protein kinase, expressed
Sobic.007G215700	Suscepible vs Resistant	10 15	Higher in Susceptible	200	50.3333	8.00694	75.6667	22.3632	22.3333	7.88106	24	4.58258	79.6667	20.6101	99	26.4575	23.6667	4.63081	32	3.60555	101	11.2694	103.333	15.3442	25.3333	3.52767	51.3333	3.33333	AT1G79670.1	Wall-associated kinase family protein	LOC_Os08g39210.1	OsWAK74 - OsWAK receptor-like protein kinase, expressed
Sobic.003G096100	Suscepible vs Resistant	5	Lower in Susceptible	131	630	20.4206	419.333	52.9224	2470	51.0816	2296	243.034	561	115.169	93.3333	21.4968	1539.67	256.255	2000	106.908	648	64.7148	139.667	67.6026	1970.67	58.3448	1826.67	33.5278	AT1G75500.1	Walls Are Thin 1	LOC_Os01g02870.1	auxin-induced protein 5NG4, putative, expressed
Sobic.010G136900	Suscepible vs Resistant	5 10 15	Higher in Susceptible	392	74.6667	20.1687	60.3333	15.3442	16.3333	5.54777	7.33333	0.666667	78.3333	11.8369	37	5.1316	9.33333	4.70225	15.3333	4.70225	65.3333	8.25295	21.6667	4.33333	5.33333	2.90593	6	3.78594	AT1G17840.1	white-brown complex homolog protein 11	LOC_Os09g03939.1	white-brown complex homolog protein 11, putative, expressed
Sobic.006G230900	Suscepible vs Resistant	5 10 15	Lower in Susceptible	289	34	2.88675	57	6.1101	165.333	0.333333	243	20.2978	19.3333	2.72845	47.3333	22.9226	169.333	8.66667	148.667	26.2953	18	1.52753	14.6667	7.42369	124	5.85947	145.333	9.56266	AT4G10265.1	Wound-responsive family protein	LOC_Os04g54240.1	wound induced protein, putative, expressed
Sobic.006G115700	Suscepible vs Resistant	5	Higher in Susceptible	107	108.667	4.70225	111	7.63763	23	6.80686	31.3333	5.54777	101	3.60555	101.333	13.4454	42.3333	6.93622	39.6667	1.20185	96	7.93725	49.6667	4.91031	42.3333	12.7061	38.6667	3.1798	AT5G56270.1	WRKY DNA-binding protein 2	LOC_Os04g39570.1	WRKY35, expressed
Sobic.005G013800	Suscepible vs Resistant	5 10 15	Lower in Susceptible	289	7	3.78594	9.66667	2.02759	30	1.73205	21	2.64575	7.33333	3.71184	4.33333	2.18581	32	2.51661	21.6667	2.60342	4.33333	2.33333	0	0	16	2.3094	5.66667	0.666667	AT5G01900.1	WRKY DNA-binding protein 62	LOC_Os11g02520.1	WRKY104, expressed
Sobic.008G029000	Suscepible vs Resistant	5	Lower in Susceptible	131	14	2.51661	13.6667	3.92994	47	11.7189	30.6667	4.25572	36.3333	4.70225	34.6667	7.75314	52.6667	3.75648	35	4.04145	23	3	24.6667	10.0885	34.3333	3.75648	28.3333	2.60342	AT3G56400.1	WRKY DNA-binding protein 70	LOC_Os11g02530.1	WRKY40, expressed
Sobic.009G238200	Suscepible vs Resistant	5	Lower in Susceptible	131	19	4.16333	62.6667	14.3101	50.3333	10.3655	28.6667	2.90593	41	8.02081	48.3333	17.6761	30.6667	0.333333	23.3333	3.75648	38.3333	9.33333	55	7.50555	26.6667	6.88799	42.6667	11.5662	AT4G11070.1	WRKY family transcription factor	LOC_Os05g49620.1	WRKY19, expressed
Sobic.008G137700	Suscepible vs Resistant	10	Lower in Susceptible	95	42.3333	15.857	27.3333	3.1798	97	16.563	102	11.5902	15.3333	1.85592	7.66667	4.33333	98	23.7136	121	28.5365	23.3333	5.36449	12	8.32666	122.667	16.3741	94	17.7858	AT4G00380.1	XH/XS domain-containing protein	LOC_Os12g38440.3	XH domain containing protein, expressed
Sobic.008G138000	Suscepible vs Resistant	10 15	Lower in Susceptible	170	22	7.37111	13	2.08167	29	8.32666	27	7.23418	2.33333	2.33333	12	0.57735	43.6667	12.9915	35	8.18535	13.3333	1.76383	13.6667	2.02759	42.6667	9.82061	42.6667	7.31057	AT1G15910.1	XH/XS domain-containing protein	LOC_Os12g38440.1	XH domain containing protein, expressed
Sobic.004G176600	Suscepible vs Resistant	5	Higher in Susceptible	107	131.667	30.9103	138.333	22.2436	41	5.50757	78.6667	22.4524	71.3333	12.4141	103.667	32.8448	41.3333	6.43774	52.3333	11.893	63.6667	6.22718	87	19.5021	51.3333	7.85988	37	6.65833	AT5G64530.1	xylem NAC domain 1	LOC_Os02g34970.1	no apical meristem protein, putative, expressed
Sobic.008G186500	Suscepible vs Resistant	5 10 15	Higher in Susceptible	392	67.6667	5.20683	64.3333	1.66667	15	3.05505	15.3333	3.92994	40.3333	15.5063	51.6667	10.3976	15.6667	2.90593	16	0.57735	57.6667	1.66667	69	12.7671	14.6667	2.4037	9.33333	1.45297	AT5G49650.1	xylulose kinase-2	LOC_Os12g43664.1	FGGY family of carbohydrate kinases, putative, expressed
Sobic.003G117200	Suscepible vs Resistant	10 15	Lower in Susceptible	170	32.6667	5.4569	34.6667	1.66667	76	7.02377	108.333	16.1898	30.6667	6.88799	31	5.2915	105	10.7858	143.333	17.8916	44	0.57735	46	6.1101	150.667	24.0439	187.333	23.5961	AT2G47680.1	zinc finger (CCCH type) helicase family protein	LOC_Os01g15300.1	zinc finger helicase family protein, putative, expressed
Sobic.007G124000	Suscepible vs Resistant	5 10	Higher in Susceptible	198	50.6667	10.4137	71.6667	9.35117	2	2	2	2	26	8.3865	36	4.3589	0	0	0	0	64.3333	14.8922	47	11.9304	0	0	0	0	AT4G02220.1	zinc finger (MYND type) family protein / programmed cell death 2 C-terminal domain-containing protein	LOC_Os03g18830.2	programmed cell death protein 2, putative, expressed
Sobic.001G174800	Suscepible vs Resistant	10 15	Higher in Susceptible	200	22.6667	1.20185	37	2.64575	9.33333	5.48736	5.66667	3.1798	30	8.5049	45	6.65833	10.3333	0.666667	10.6667	2.96273	32.6667	7.31057	34.6667	7.9652	4.33333	2.33333	8.33333	4.63081	AT4G02220.1	zinc finger (MYND type) family protein / programmed cell death 2 C-terminal domain-containing protein	LOC_Os01g39650.1	programmed cell death protein 2, putative, expressed
Sobic.001G186700	Suscepible vs Resistant	10	Lower in Susceptible	95	2	2	4	2	16.6667	3.28295	9	1.52753	0	0	7.33333	0.881917	16	4.72582	13	4.04145	1.66667	1.66667	10	1.1547	15	2.64575	11	2.3094	AT2G33835.1	Zinc finger C-x8-C-x5-C-x3-H type family protein	LOC_Os03g37140.1	expressed protein
Sobic.002G219300	Suscepible vs Resistant	10	Higher in Susceptible	115	49	2.64575	23.3333	1.45297	34.3333	2.18581	34.6667	7.17248	59	28.2135	20.6667	6.00925	22.6667	3.38296	41.3333	6.38575	19.3333	2.72845	13.6667	2.02759	24	4.58258	16.6667	2.96273	AT2G41940.1	zinc finger protein 8	LOC_Os09g27320.1	ZOS9-13 - C2H2 zinc finger protein, expressed
Sobic.009G222200	Suscepible vs Resistant	5	Lower in Susceptible	131	1629.33	110.883	3537.33	1333.75	8916.67	4328.46	5068.33	2157.09	6350.33	3826.19	3878.67	1766.07	15377	2338.01	6042	1972.88	1512.33	528.851	502	43.0155	3901.67	1284.05	1173.67	687.605	AT3G18290.1	zinc finger protein-related	LOC_Os01g49470.1	E3 ubiquitin ligase, putative, expressed
Sobic.003G131600	Suscepible vs Resistant	5 10	Lower in Susceptible	161	49.3333	8.56997	42.3333	15.9618	303.333	19.936	274	19.8578	44.3333	10.4775	20.6667	2.848	322.333	67.41	249	21.5019	69	1.73205	18.3333	3.84419	248.333	28.591	207.333	20.0361	AT3G43790.1	zinc induced facilitator-like 2	LOC_Os01g17214.1	major facilitator superfamily antiporter, putative, expressed
Sobic.005G048200	Suscepible vs Resistant	5	Lower in Susceptible	131	0	0	0	0	20	2.51661	13	0.57735	0	0	0	0	16.3333	3.1798	12.3333	6.22718	0	0	0	0	19.6667	1.66667	13.3333	3.1798	AT3G42860.1	zinc knuckle (CCHC-type) family protein	LOC_Os12g08530.1	expressed protein
Sobic.001G156800	Suscepible vs Resistant	5	Lower in Susceptible	131	18.6667	4.25572	52.3333	25.0754	212.333	159.104	84	41.0406	157.333	124.834	31.3333	19.0117	473.333	364.739	59.6667	30.683	38.3333	22.5191	7	3.78594	110	91.7006	41.6667	26.8225	AT1G31260.1	zinc transporter 10 precursor	LOC_Os03g46470.1	metal cation transporter, putative, expressed
Sobic.002G379100	Suscepible vs Resistant	10 15	Lower in Susceptible	170	15.3333	1.20185	15	3.05505	29.6667	6.06447	25.6667	4.37163	8	1	9	4.50925	30	4.3589	25.3333	7.31057	12	5.1316	9.33333	0.666667	28.3333	1.45297	30.3333	2.72845	AT1G22440.1	Zinc-binding alcohol dehydrogenase family protein	LOC_Os07g42924.1	dehydrogenase, putative, expressed
Sobic.005G082500	Suscepible vs Resistant	5 10	Lower in Susceptible	161	0	0	0	0	17.6667	4.66667	8.66667	8.66667	0	0	0	0	19.6667	2.72845	10	2.3094	1.66667	1.66667	4	4	9.66667	2.02759	7.66667	1.33333	AT3G03080.1	Zinc-binding dehydrogenase family protein	LOC_Os11g14910.1	NADP-dependent oxidoreductase, putative, expressed
Sobic.005G082600	Suscepible vs Resistant	5 10	Lower in Susceptible	161	13	4.72582	20.6667	12.7192	157.667	14.3333	152.333	19.5306	13.3333	3.28295	16	4.58258	139	8.18535	138.333	12.7715	18.6667	2.96273	36.3333	13.9563	174	24.5832	185	13.5031	AT3G03080.1	Zinc-binding dehydrogenase family protein	LOC_Os11g14910.1	NADP-dependent oxidoreductase, putative, expressed
Sobic.001G092400	Suscepible vs Resistant	5	Higher in Susceptible	107	17.6667	2.18581	13	2.08167	0	0	0	0	9.66667	5.48736	11.6667	4.17665	0	0	2	2	17.6667	3.84419	9.33333	2.96273	0	0	0	0
Sobic.001G156401	Suscepible vs Resistant	5	Higher in Susceptible	107	57.3333	3.33333	44.6667	1.66667	18.6667	3.84419	23.3333	1.76383	79	4.04145	76	6.9282	33.6667	4.8074	27	1.73205	40	4.04145	45.3333	12.4141	28	3	25.3333	2.72845
Sobic.001G243732	Suscepible vs Resistant	5	Higher in Susceptible	107	20.6667	1.20185	27.6667	4.05518	0	0	0	0	17	5.7735	31.3333	5.81187	6	6	1.66667	1.66667	20.6667	2.02759	25.3333	2.66667	0	0	0	0	AT4G14746.1		LOC_Os10g28380.1	MTN26L3 - MtN26 family protein precursor, putative, expressed
Sobic.001G330850	Suscepible vs Resistant	5	Higher in Susceptible	107	126	43.0039	70.6667	21.3646	23	5.68624	24.3333	3.1798	93.3333	19.4108	24	2.51661	32.3333	7.4461	25.6667	6.56591	122.333	15.1914	45.3333	11.2151	27	4.16333	25.6667	3.52767
Sobic.001G448750	Suscepible vs Resistant	5	Higher in Susceptible	107	19.6667	2.66667	9.33333	2.02759	0	0	2	2	19.3333	0.333333	5	5	0	0	0	0	11.3333	1.85592	2.66667	2.66667	0	0	0	0
Sobic.001G535601	Suscepible vs Resistant	5	Higher in Susceptible	107	17.6667	2.33333	12.3333	3.1798	0	0	0	0	8.66667	4.66667	11	5.56776	0	0	0	0	12.3333	3.84419	14.6667	2.60342	0	0	1.66667	1.66667
Sobic.002G018901	Suscepible vs Resistant	5	Higher in Susceptible	107	34	2	21	1.52753	10	0.57735	11	2.64575	16.3333	8.76229	17	5.50757	6	0	11.3333	3.1798	34	4.3589	20.3333	5.78312	13.3333	1.33333	11.3333	2.60342
Sobic.002G022500	Suscepible vs Resistant	5	Higher in Susceptible	107	18.6667	2.02759	18.3333	4.33333	0	0	2	2	7.66667	7.66667	14.6667	2.60342	2	2	0	0	21	3	14.6667	4.48454	0	0	0	0
Sobic.002G049900	Suscepible vs Resistant	5	Higher in Susceptible	107	20	2.3094	19.3333	0.333333	0	0	3.33333	3.33333	12	1.1547	11.3333	5.78312	0	0	0	0	18.3333	1.76383	15.3333	2.60342	0	0	0	0
Sobic.002G073250	Suscepible vs Resistant	5	Higher in Susceptible	107	307	1.52753	272.667	30.2067	76	4.50925	72.3333	8.76229	182.333	31.1466	176.667	31.8608	60.6667	11.5662	79.3333	2.33333	237.333	4.91031	156	3.51188	49.6667	3.1798	56	3.4641
Sobic.002G224450	Suscepible vs Resistant	5	Higher in Susceptible	107	74.6667	2.848	71.6667	2.4037	24.3333	0.666667	24	1.52753	37.6667	8.76229	43	6.245	16.6667	1.85592	19	2.51661	60	4.50925	41	1.52753	14	2.3094	19.3333	2.72845
Sobic.003G146400	Suscepible vs Resistant	5	Higher in Susceptible	107	28.6667	7.31057	19	2.08167	8	2	11.6667	2.02759	18.6667	2.60342	9.66667	0.881917	12.6667	5.23874	14	2.08167	13.6667	2.02759	8.33333	4.40959	11	1	12.3333	1.76383			LOC_Os01g20780.1	anther-specific protein SF18 precursor, putative, expressed
Sobic.003G171701	Suscepible vs Resistant	5	Higher in Susceptible	107	23	7.2111	22	6.50641	2	2	0	0	12.6667	1.76383	14.3333	8.08977	0	0	0	0	12.3333	2.18581	13.3333	3.52767	0	0	0	0
Sobic.003G396900	Suscepible vs Resistant	5	Higher in Susceptible	107	51.6667	6.64162	27.3333	5.84047	18.3333	2.02759	16	4	44.6667	3.52767	20.3333	4.33333	22.6667	6.17342	11	1	25	2.3094	20	6.4291	12.6667	1.85592	15.3333	1.85592			LOC_Os01g68130.1	expressed protein
Sobic.003G416000	Suscepible vs Resistant	5	Higher in Susceptible	107	22.6667	1.45297	24.6667	3.4801	4.66667	2.60342	11	1.52753	34.6667	9.6148	40.6667	7.17248	13	4.72582	14	7.02377	20.3333	3.1798	22.3333	2.33333	21.6667	2.33333	28.3333	1.85592
Sobic.004G005700	Suscepible vs Resistant	5	Higher in Susceptible	107	23	3.4641	16.3333	2.66667	1.66667	1.66667	6.66667	0.666667	12	0.57735	22.3333	1.45297	4	2	2.66667	2.66667	19	4.04145	16	1	3.33333	1.66667	3.33333	1.66667			LOC_Os10g33490.1	expressed protein
Sobic.004G010800	Suscepible vs Resistant	5	Higher in Susceptible	107	149	10.583	144.333	19.3247	38.3333	1.20185	50	3.05505	93	13.2035	151.667	17.3333	40.3333	8.98765	45.6667	3.4801	142.333	12.0324	157	21.9393	50.6667	3.1798	61.6667	4.09607
Sobic.004G111650	Suscepible vs Resistant	5	Higher in Susceptible	107	24.6667	4.33333	24.6667	3.66667	5.66667	0.333333	4.66667	2.4037	25.6667	4.17665	18	1.52753	12.3333	1.76383	6.33333	4.09607	33.3333	0.881917	15.6667	0.666667	4.33333	2.33333	1.66667	1.66667
Sobic.004G134000	Suscepible vs Resistant	5	Higher in Susceptible	107	16.3333	2.02759	9	2.08167	0	0	0	0	10.3333	5.17472	10.6667	2.02759	0	0	0	0	8.33333	0.333333	11.6667	3.52767	0	0	0	0
Sobic.004G154700	Suscepible vs Resistant	5	Higher in Susceptible	107	81.6667	7.12585	74.6667	17.1691	20.3333	0.881917	25	0.57735	52.3333	2.96273	53	4.04145	21	6.1101	23	0.57735	67.3333	5.23874	59	6.50641	23	4.3589	25.3333	1.33333			LOC_Os01g08760.1	choline/ethanolamine kinase, putative, expressed
Sobic.004G167500	Suscepible vs Resistant	5	Higher in Susceptible	107	29.3333	2.33333	16	1.52753	10.6667	1.20185	15.3333	3.28295	36.6667	7.31057	26	4.3589	19.3333	1.76383	13.6667	1.85592	27.3333	0.881917	23	4.93288	15.6667	1.20185	14	4.58258	AT3G11600.1		LOC_Os04g33860.1	expressed protein
Sobic.005G016900	Suscepible vs Resistant	5	Higher in Susceptible	107	28	2.88675	35.6667	6.9602	10	0.57735	12.3333	4.91031	63	15.3731	49.6667	9.38675	24.3333	5.36449	14.6667	5.696	21	0	11.3333	2.4037	8.33333	1.66667	6.33333	3.1798	AT5G01015.1		LOC_Os12g02800.1	CRP11 - Cysteine-rich family protein precursor, expressed
Sobic.005G031800	Suscepible vs Resistant	5	Higher in Susceptible	107	81.6667	23.6948	53.3333	3.1798	12	2.08167	24.3333	8.19214	73.6667	29.2252	41.6667	12.1701	26	6.50641	18	7.93725	199	31.5331	71	42.3596	74.6667	12.7715	80	8.14453
Sobic.005G068300	Suscepible vs Resistant	5	Higher in Susceptible	107	108	14.2945	146	18.5203	25.6667	1.76383	30.3333	12.0324	77.3333	15.4524	89.3333	13.691	29.3333	4.17665	24.3333	5.36449	127.667	4.09607	122.333	7.4461	59.6667	9.38675	53.6667	5.78312
Sobic.005G076700	Suscepible vs Resistant	5	Higher in Susceptible	107	63.6667	4.8074	50.6667	4.91031	11.3333	1.45297	21	7.76745	40	5.1316	35.3333	7.35603	21.6667	1.85592	9.66667	1.20185	55.6667	5.81187	30.6667	8.95048	10	0.57735	11	1.52753
Sobic.005G103200	Suscepible vs Resistant	5	Higher in Susceptible	107	28	9.29157	37	8.5049	0	0	0	0	4.33333	2.18581	13.6667	1.33333	0	0	1.66667	1.66667	44.6667	10.1379	22.3333	1.85592	0	0	0	0
Sobic.005G183450	Suscepible vs Resistant	5	Higher in Susceptible	107	40	3.4641	36	6.245	12.6667	0.881917	11	1.73205	28.6667	4.25572	24	2.08167	17.3333	0.666667	7.33333	4.05518	27	1.1547	20	5.7735	6.66667	3.52767	2.33333	2.33333
Sobic.005G210300	Suscepible vs Resistant	5	Higher in Susceptible	107	64.3333	15.9826	42.3333	9.06152	17	2.3094	16.3333	2.33333	32	2.51661	32.6667	4.70225	20.6667	2.848	15.3333	3.75648	22	2	35.6667	7.88106	19.3333	3.52767	22	4.16333
Sobic.006G007800	Suscepible vs Resistant	5	Higher in Susceptible	107	18.3333	3.28295	43.3333	10.3494	0	0	14.6667	3.52767	18	8.73689	70.3333	24.037	9.33333	2.02759	10	2.88675	21.6667	5.696	104.333	25.0954	7.33333	1.45297	16.3333	3.71184			LOC_Os04g01950.1	legume lectins beta domain containing protein, putative, expressed
Sobic.006G016000	Suscepible vs Resistant	5	Higher in Susceptible	107	17.3333	4.66667	15	3.05505	0	0	0	0	10.3333	6.06447	11.3333	2.18581	0	0	0	0	13.3333	2.02759	8	5.68624	0	0	0	0
Sobic.006G162500	Suscepible vs Resistant	5	Higher in Susceptible	107	20.3333	6.22718	13	6.02771	2	2	5.33333	2.90593	12	2	7.66667	4.97773	0	0	1.66667	1.66667	17	10.4403	10.3333	6.06447	0	0	0	0
Sobic.007G063800	Suscepible vs Resistant	5	Higher in Susceptible	107	33	1.1547	21.3333	2.72845	2	2	11	6.65833	20.6667	4.8074	11.3333	6.35959	19	7.81025	10.3333	0.881917	35	4.72582	12.3333	2.18581	8.33333	2.02759	10.6667	2.33333
Sobic.008G010200	Suscepible vs Resistant	5	Higher in Susceptible	107	80.6667	5.04425	58.3333	2.02759	26.6667	0.666667	24	1.1547	88.6667	12.1701	39	4	33.3333	4.66667	23.6667	1.20185	78	3.4641	67	11.3725	25	1.52753	27.6667	3.1798	AT3G56250.1		LOC_Os12g02050.1	expressed protein
Sobic.008G016250	Suscepible vs Resistant	5	Higher in Susceptible	107	101.333	35.983	45	12.5033	5.33333	2.90593	2.66667	2.66667	41	3	34.3333	29.475	2	2	6.66667	0.666667	7.33333	3.84419	33.6667	18.8001	0	0	0	0
Sobic.008G054800	Suscepible vs Resistant	5	Higher in Susceptible	107	38.3333	2.90593	32	2.51661	4.33333	4.33333	0	0	13.3333	4.09607	19.3333	9.68389	0	0	2.66667	2.66667	30.6667	3.28295	17	3.78594	0	0	3.33333	1.66667			LOC_Os08g41320.1	BHLH transcription factor, putative, expressed
Sobic.008G116200	Suscepible vs Resistant	5	Higher in Susceptible	107	25	2.51661	17.6667	3.84419	3.66667	1.85592	2	2	23.3333	1.45297	13.3333	3.84419	4.66667	4.66667	4.66667	2.4037	18	1.52753	10.3333	2.72845	0	0	1.66667	1.66667
Sobic.008G120920	Suscepible vs Resistant	5	Higher in Susceptible	107	20.3333	5.48736	10.6667	2.60342	0	0	0	0	6	3.21455	4.33333	2.18581	0	0	0	0	15.6667	2.96273	6.33333	0.881917	0	0	0	0
Sobic.009G022600	Suscepible vs Resistant	5	Higher in Susceptible	107	586.333	113.492	623.333	66.2177	109.333	4.33333	433.667	16.9148	412.333	46.6667	2254.67	709.285	126.667	22.2136	393	32.3161	167.333	1.20185	424.333	147.587	107.667	41.0866	122.333	11.3333
Sobic.009G189000	Suscepible vs Resistant	5	Higher in Susceptible	107	4211	835.681	5730.67	1004.93	1018	34.0196	1300.33	95.6754	3209	412.117	5576.67	660.065	836.667	132.683	1007	47.3533	2207	226.754	2776.67	217.221	717.333	74.5035	602.333	44.7859	AT4G27390.1		LOC_Os05g42280.1	expressed protein
Sobic.010G075200	Suscepible vs Resistant	5	Higher in Susceptible	107	85.3333	12.3468	118	9.53939	29	4.04145	37.3333	2.18581	122.333	21.4035	212.667	16.6966	41.6667	7.2188	40	3.51188	56.6667	7.75314	138.667	25.7186	28.6667	4.17665	32.3333	3.66667			LOC_Os06g09940.1	expressed protein
Sobic.010G128500	Suscepible vs Resistant	5	Higher in Susceptible	107	221	11.2694	247	16.773	47	7.57188	63.6667	3.28295	150	17.7858	177.333	17.0522	51	15.5027	60	10.116	188.667	2.18581	241.333	23.877	44.3333	9.52774	54	4.72582
Sobic.010G153201	Suscepible vs Resistant	5	Higher in Susceptible	107	516.667	28.0614	431	29.2973	115.333	25.3136	101.667	3.4801	201.333	73.3697	209.333	51.4015	68.6667	3.4801	71.3333	8.00694	397.333	44.1827	154	8.66025	123.667	25.0089	99	19.8578
Sobic.010G165900	Suscepible vs Resistant	5	Higher in Susceptible	107	329.667	8.83805	260	10.6927	94	7.0946	83.6667	8.37324	437.667	21.1844	323.667	19.1949	141.667	17.0717	109	1.1547	290.333	17.3622	258.333	45.7323	93.3333	7.88106	74.6667	3.1798
Sobic.010G257500	Suscepible vs Resistant	5	Higher in Susceptible	107	64	3.78594	50.6667	2.60342	16.3333	0.666667	18	5.7735	33	10.504	47.3333	8.21246	20	5.19615	23.6667	3.1798	65.6667	8.68588	68	6.80686	33.3333	4.66667	30.6667	4.97773	AT1G60460.1		LOC_Os06g49450.1	expressed protein
Sobic.001G257100	Suscepible vs Resistant	10	Higher in Susceptible	115	17.6667	1.85592	16.3333	1.45297	16.3333	2.72845	12.3333	1.20185	20	2.64575	9	2.51661	5	2.64575	11.6667	3.1798	11.6667	0.881917	9.66667	2.60342	9.33333	0.666667	14.6667	0.333333	AT3G13980.1		LOC_Os10g25810.1	expressed protein
Sobic.001G258700	Suscepible vs Resistant	10	Higher in Susceptible	115	19.6667	3.71184	22	3.51188	8.33333	1.45297	11.6667	1.45297	23.3333	1.45297	24	2.64575	8	1	6	3.4641	21.3333	1.20185	14.3333	0.333333	12.6667	2.18581	4.66667	2.60342
Sobic.001G299300	Suscepible vs Resistant	10	Higher in Susceptible	115	14.3333	5.84047	21	1.1547	0	0	0	0	24.6667	1.45297	33.3333	6.33333	2	2	0	0	28.3333	1.33333	22.3333	6.33333	0	0	0	0
Sobic.001G376150	Suscepible vs Resistant	10	Higher in Susceptible	115	13.3333	0.881917	11.3333	0.881917	8.66667	3.1798	10.3333	1.85592	26.6667	5.78312	13.3333	1.20185	8.66667	1.45297	5	2.64575	8.33333	0.881917	5.33333	2.90593	8	2.51661	1.66667	1.66667
Sobic.002G002900	Suscepible vs Resistant	10	Higher in Susceptible	115	6.66667	0.666667	13.3333	3.52767	4.66667	2.60342	4.33333	4.33333	12.3333	1.85592	8	1.52753	0	0	9.66667	0.881917	10.3333	0.666667	15	8.96289	8.33333	2.848	10.3333	2.02759
[truncated: 715 more rows]
